# Supplementary material for: Waning habitats due to climate change: effects of streamflow and temperature changes at the rear edge of the distribution of a cold-water fish
Source: Copernicus journal article supplement (doi:10.5194/hess-2016-606), 2017-01-09
Supplement: Supplementary file 1 [file hess-2016-606-supplement.zip]

Archive with 5 entries (5 files):
- Santiago_SM01_FigS1-S24 .pdf
- Santiago_SM02_DatasetS1.xlsx
- Santiago_SM03_TableS1 .pdf
- Santiago_SM04_DatasetS2.xlsx
- Santiago_SM05_DatasetS3.xlsx
