# Supplementary material for: Waning habitats due to climate change: effects of streamflow and temperature changes at the rear edge of the distribution of a cold-water fish
Source: Copernicus journal article supplement (doi:10.5194/hess-2016-606), 2017-01-09
Supplement: Supplementary file 1 [file hess-2016-606-supplement.zip › Santiago_SM01_FigS1-S24 .pdf]

## Supplementary Material.

**Figures S1 to S24**, show the expected relative seasonal changes in daily absolute precipitation (mm/day) and daily mean temperature (°C) throughout the XXI century per meteorological station and each of the climate change studied scenarios (RCP4.5 and RCP8.5). Results are shown as 30-years moving average against the 1971-2000 average (used as a reference). The vertical dotted line indicates the end of the historical experiment (black) and the start of the RCPs. Thick lines show the median of the values for all models; the shaded area indicates ranges from the 10<sup>th</sup> to 90<sup>th</sup> percentiles. Seasons are indicated by the initial letter of their months.

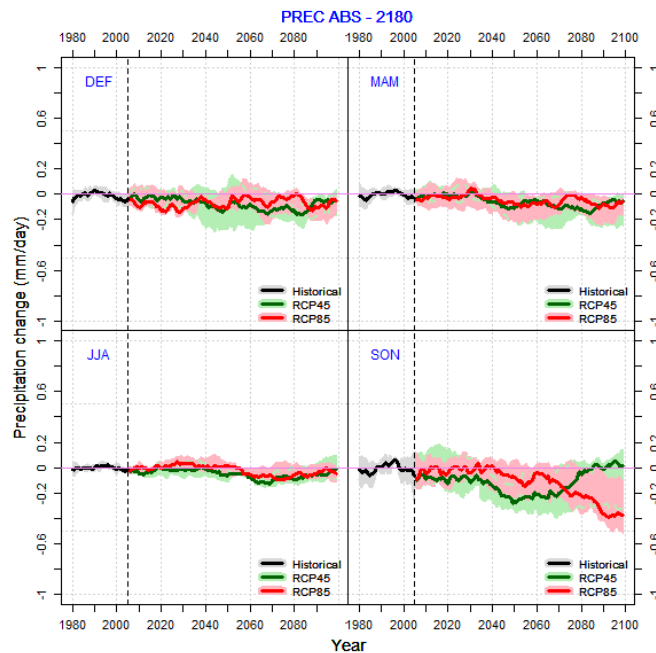

**Figure S1.** Seasonal changes in daily absolute precipitation in the Matabuena meteorological station (code 2180).

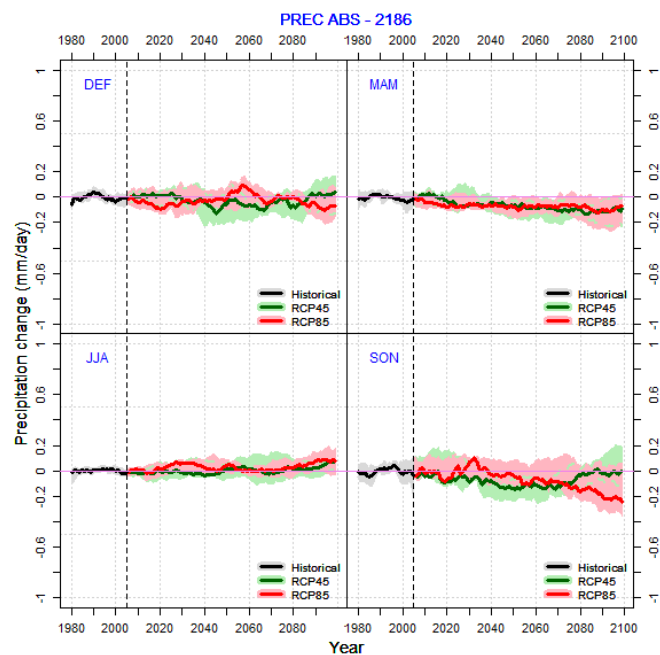

**Figure S2.** Seasonal changes in daily absolute precipitation in the Turégano meteorological station (code 2186).

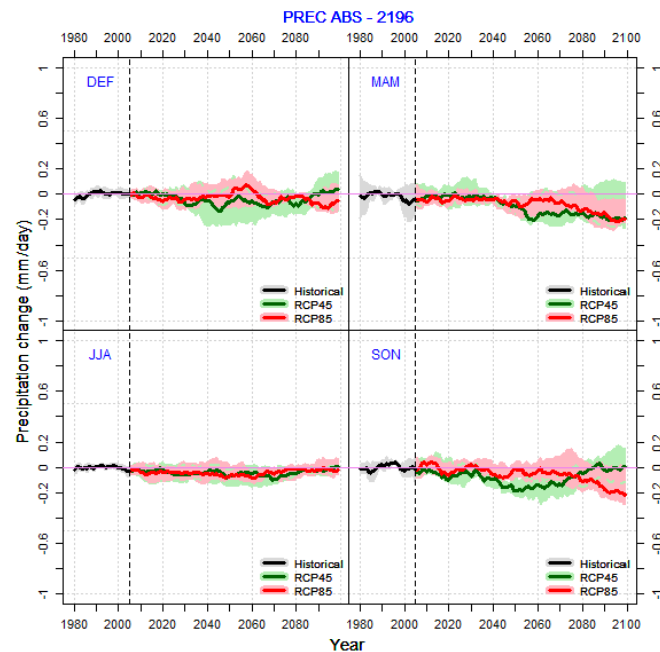

**Figure S3.** Seasonal changes in daily absolute precipitation in the Torreiglesias meteorological station (code 2196).

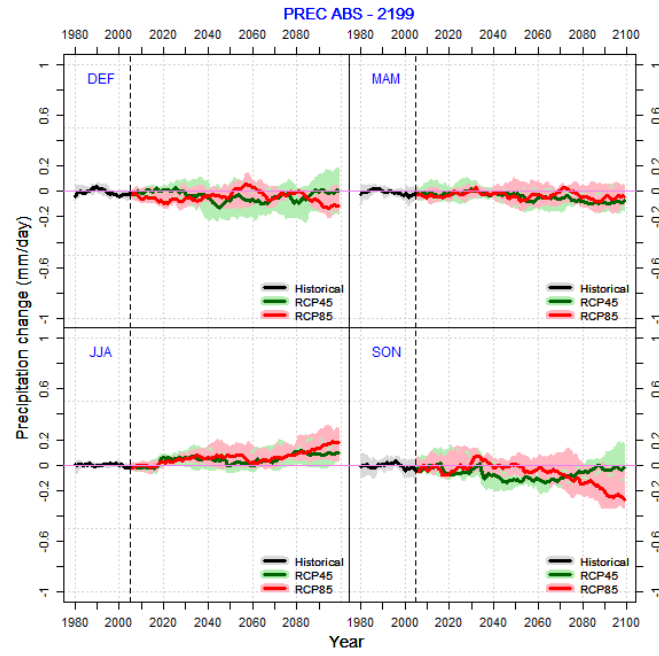

**Figure S4.** Seasonal changes in daily absolute precipitation in the Cantimpalos meteorological station (code 2199).

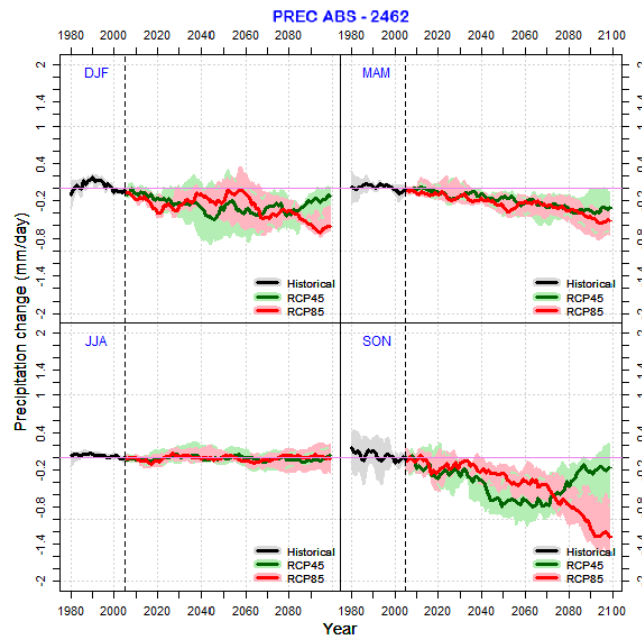

**Figure S5.** Seasonal changes in daily absolute precipitation in the Puerto de Navacerrada meteorological station (code 2462).

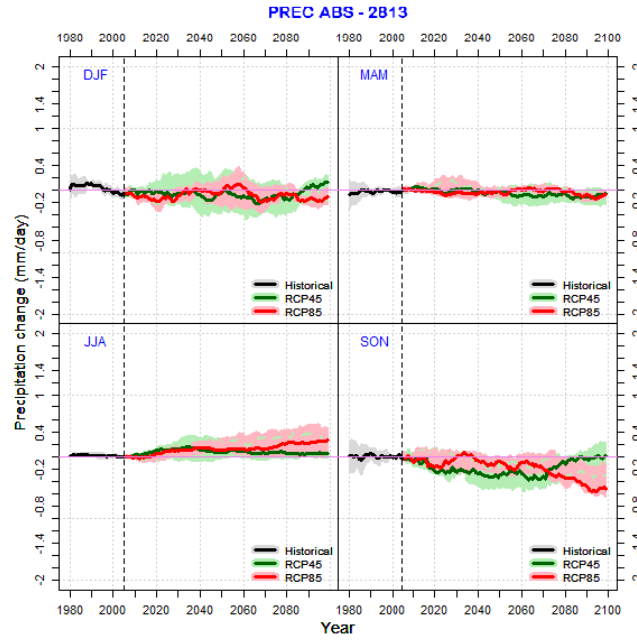

**Figure S6.** Seasonal changes in daily absolute precipitation in the Navacepeda de Tormes meteorological station (code 2813).

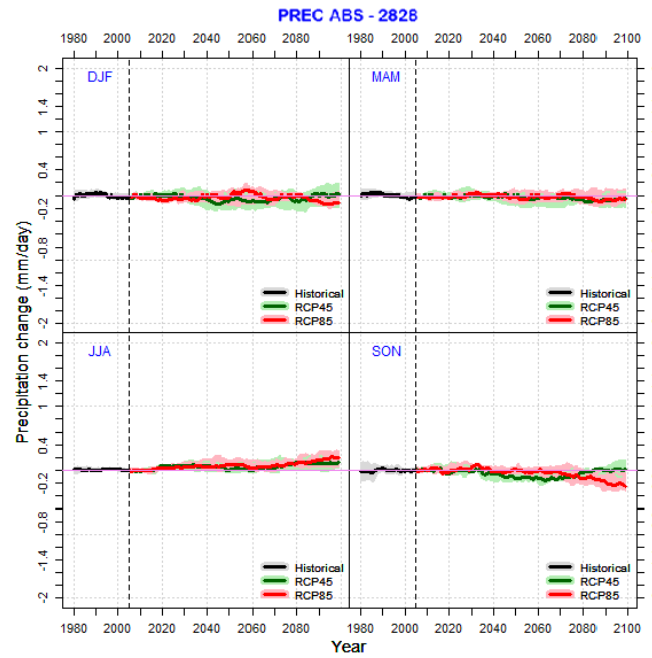

**Figure S7.** Seasonal changes in daily absolute precipitation in the El Barco de Ávila meteorological station (code 2828).

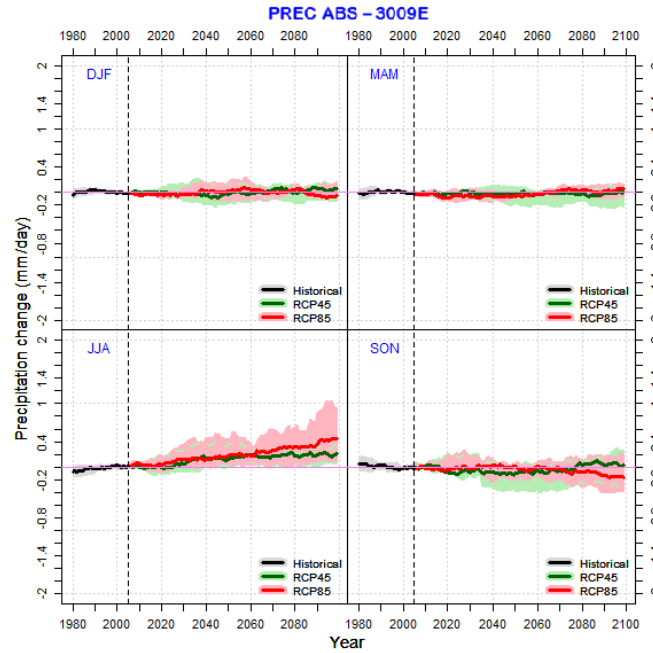

**Figure S8.** Seasonal changes in daily absolute precipitation in Orihuela del Tremedal meteorological station (code 3009E).

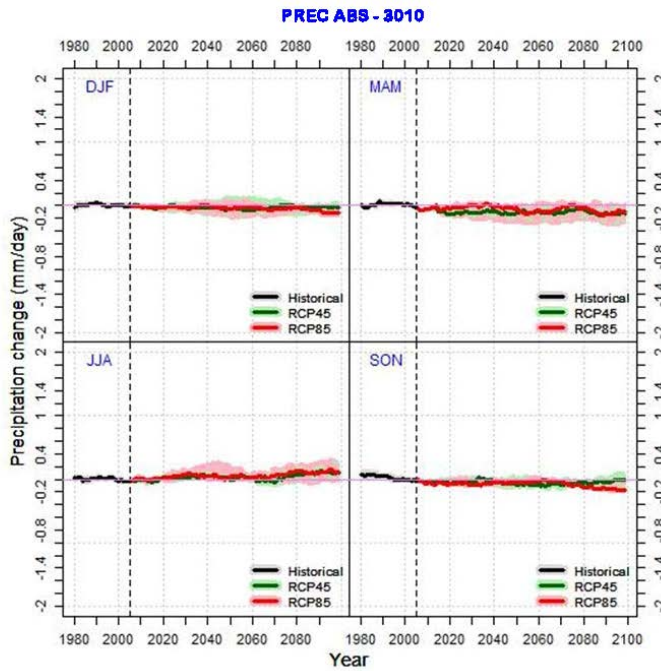

**Figure S9.** Seasonal changes in daily absolute precipitation in Ródenas meteorological station (code 3009E).

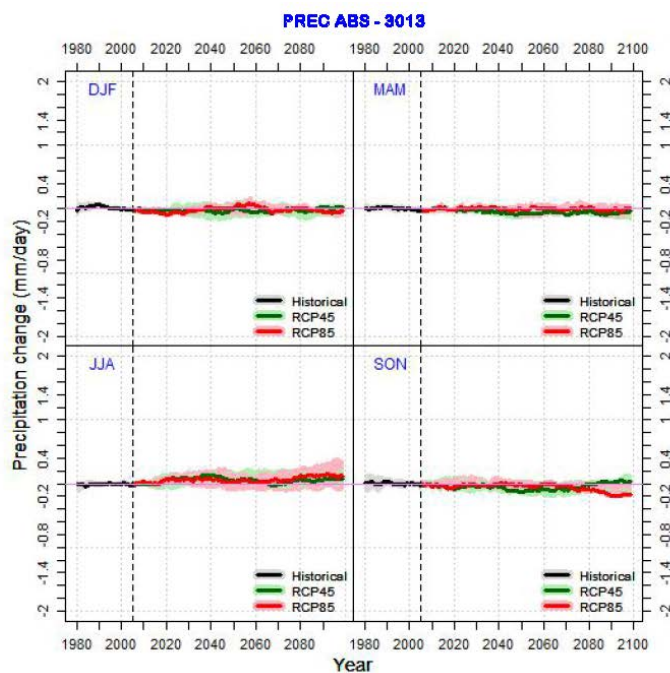

**Figure S10.** Seasonal changes in daily absolute precipitation in Molina de Aragón meteorological station (code 3009E).

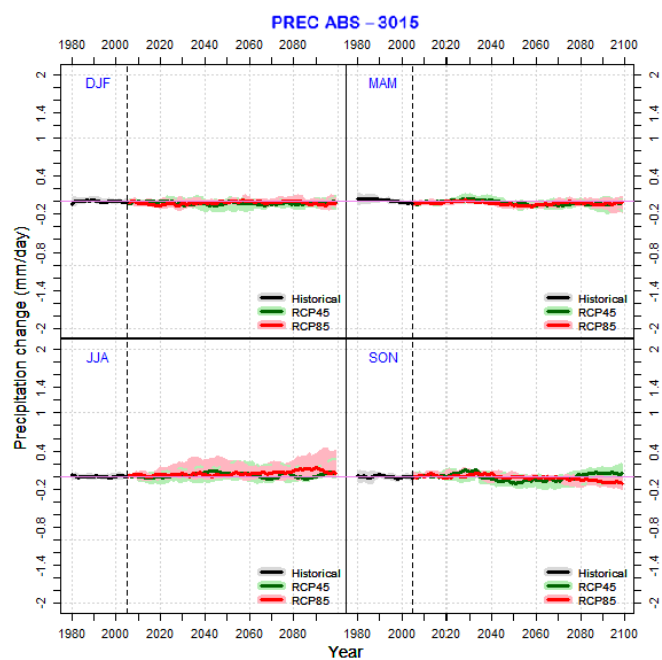

**Figure S11.** Seasonal changes in daily absolute precipitation in Corduente meteorological station (code 3015).

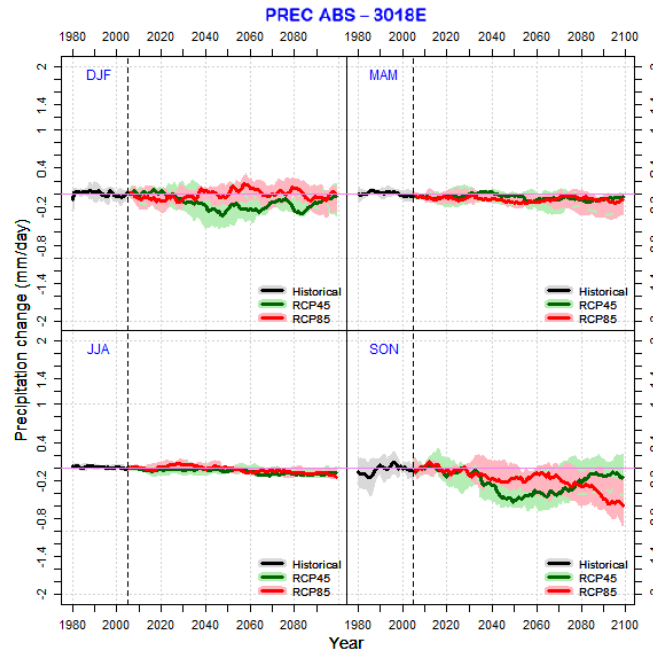

**Figure S12.** Seasonal changes in daily absolute precipitation in Aragoncillo meteorological station (code 3018E).

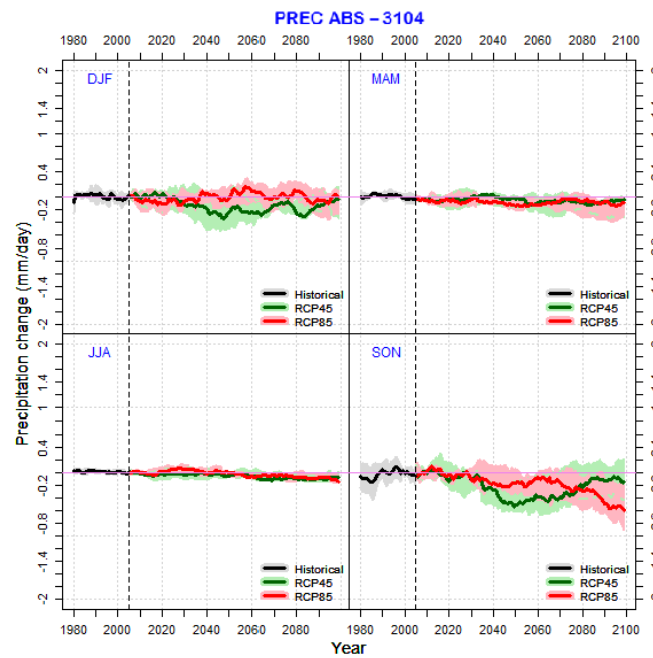

**Figure S13.** Seasonal changes in daily absolute precipitation in Rascafría-El Paular meteorological station (code 3104).

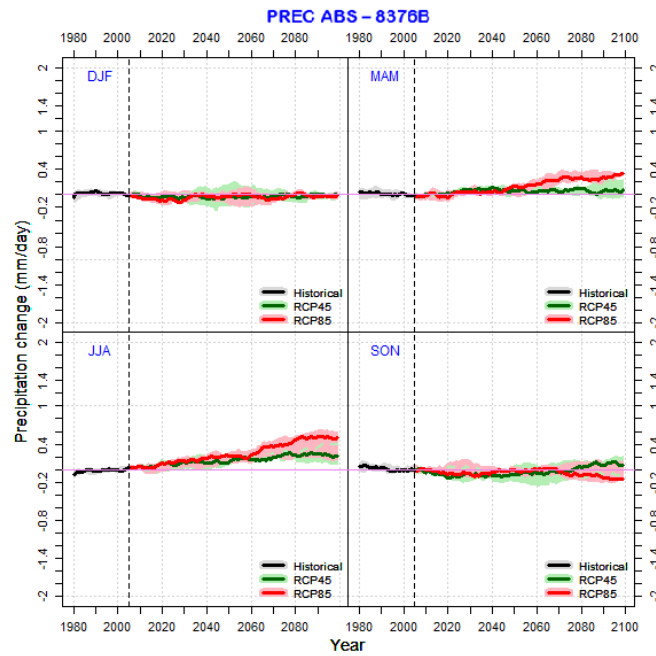

**Figure S14.** Seasonal changes in daily absolute precipitation in Jabaloyas meteorological station (code 8376B).

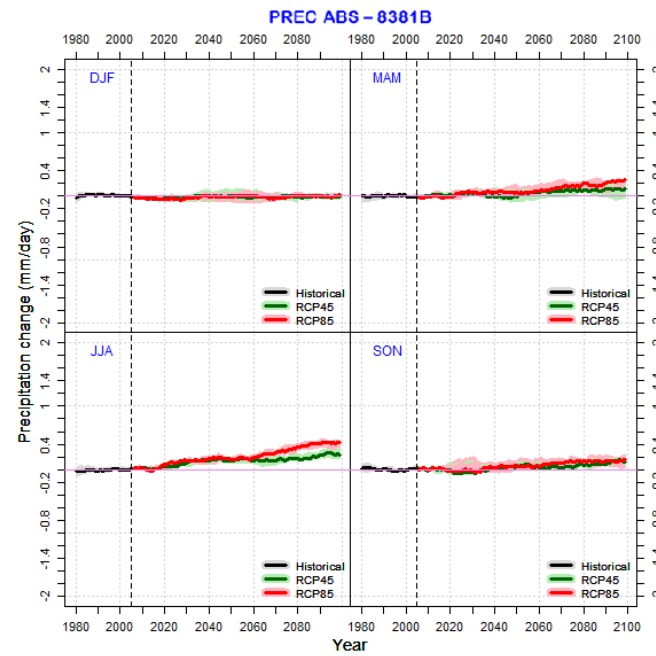

**Figure S15.** Seasonal changes in daily absolute precipitation in Ademuz-Agro meteorological station (code 8381B).

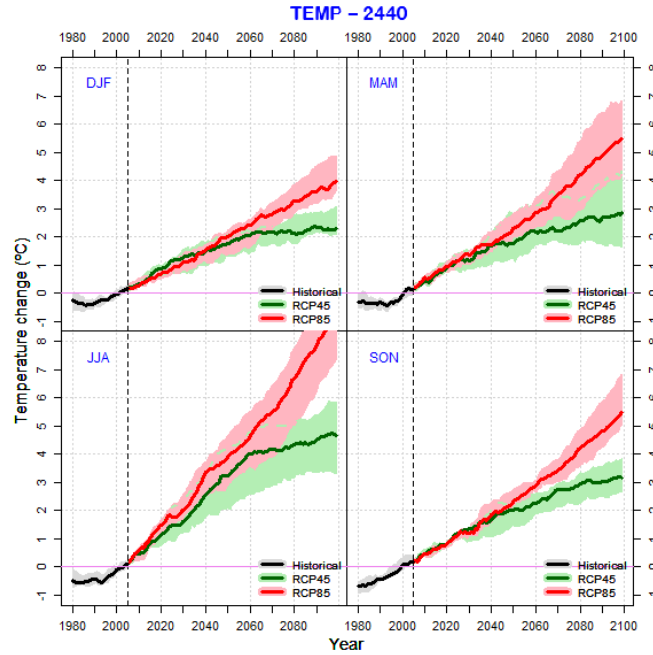

**Figure S16.** Seasonal changes in daily mean temperature in Aldea del Rey Niño meteorological station (code 2440).

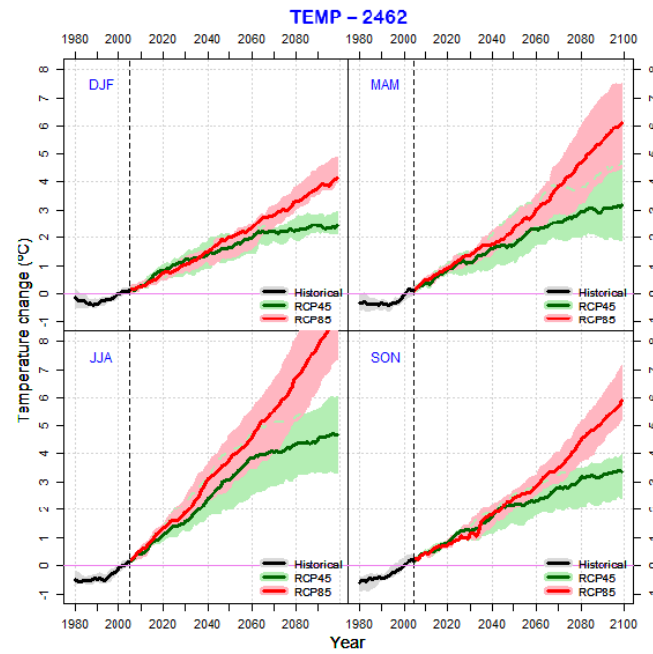

**Figure S17.** Seasonal changes in daily mean temperature in Puerto de Navacerrada meteorological station (code 2462).

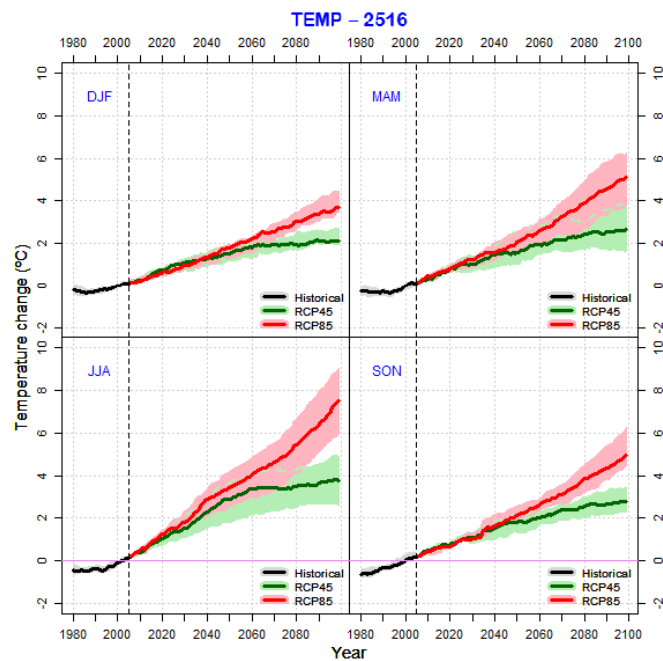

**Figure S18.** Seasonal changes in daily mean temperature in Ataquines meteorological station (code 2516).

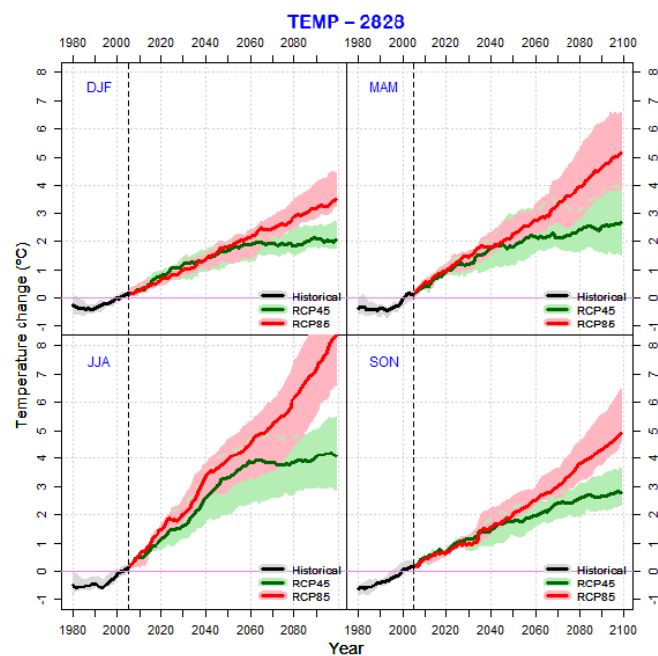

**Figure S19.** Seasonal changes in daily mean temperature in El Barco de Ávila meteorological station (code 2828).

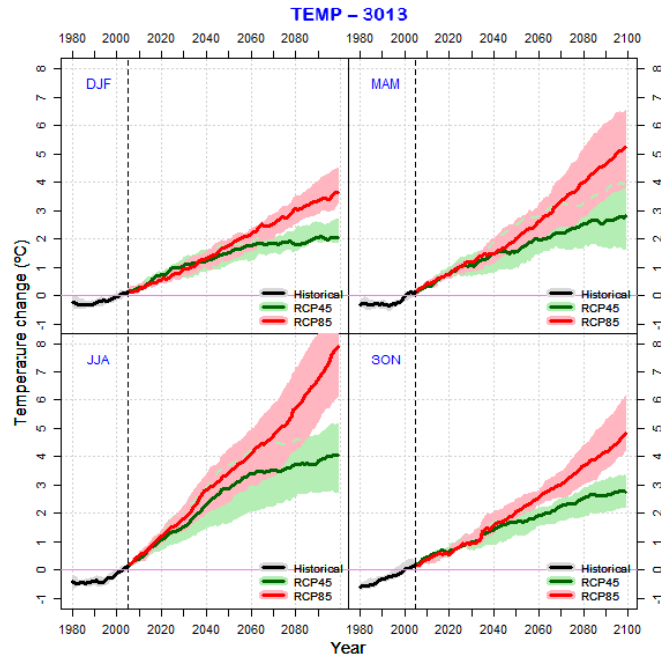

**Figure S20.** Seasonal changes in daily mean temperature in Molina de Aragón meteorological station (code 3013).

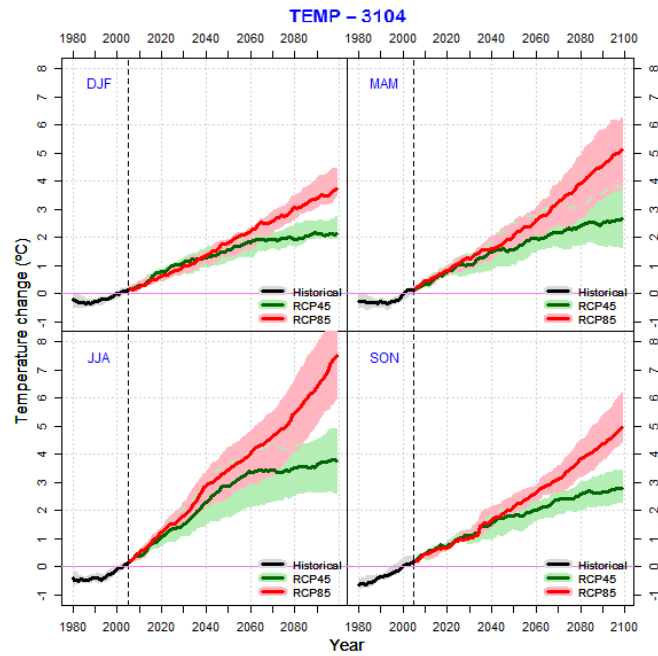

**Figure S21.** Seasonal changes in daily mean temperature in Rascafría-El Paular meteorological station (code 3104).

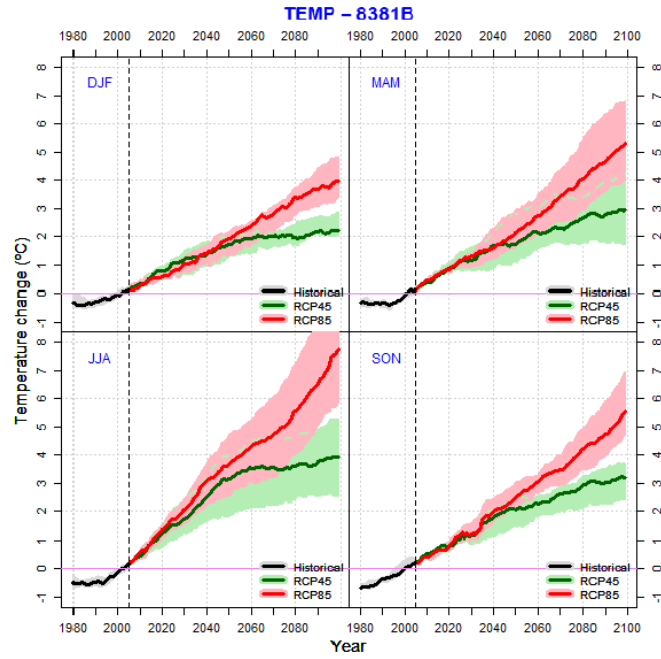

**Figure S22.** Seasonal changes in daily mean temperature in Ademuz-Agro meteorological station (code 8381B).

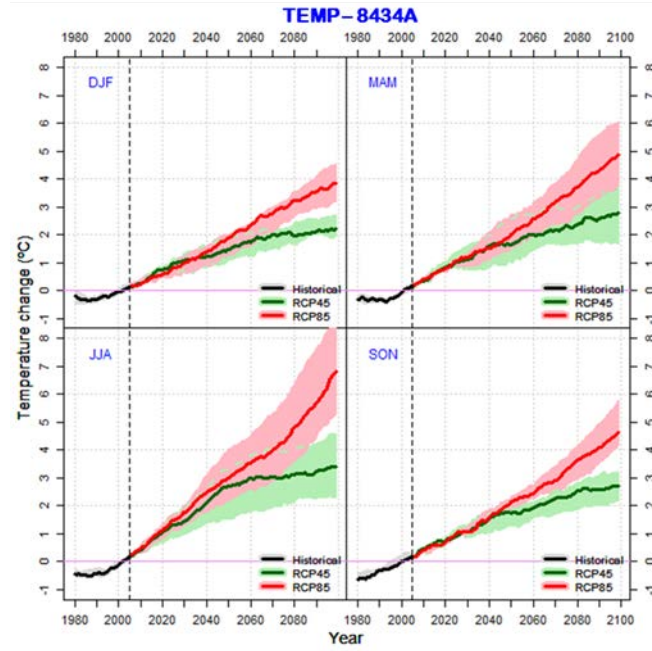

**Figure S23.** Seasonal changes in daily mean temperature in Viver-Agro meteorological station (code 8434A).

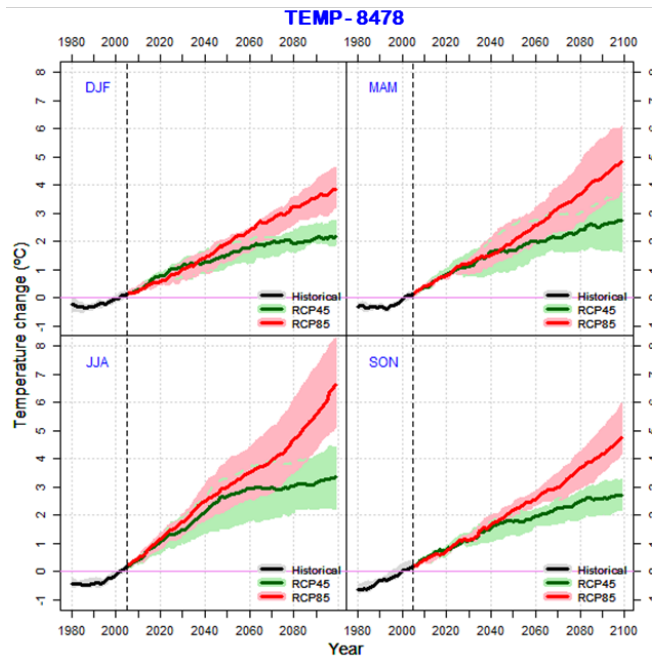

**Figure S24.** Seasonal changes in daily mean temperature in Arañuel meteorological station (code 8478).
