# Supplementary material for: Waning habitats due to climate change: effects of streamflow and temperature changes at the rear edge of the distribution of a cold-water fish
Source: Copernicus journal article supplement (doi:10.5194/hess-2016-606), 2017-01-09
Supplement: Supplementary file 1 [file hess-2016-606-supplement.zip › Santiago_SM05_DatasetS3.xlsx]

## Sheet: Dataset S3. DMST-ensemble
Dataset S3. Climate change predictions (daily mean stream temperature [DMST]) per thermograph site and scenario. Ensemble of nine models. Unit: Celsius degrees.
SITE	Aravalle	Aravalle	Barbellido	Barbellido	Gredos Gorge	Gredos Gorge	Tormes1	Tormes1	Tormes2	Tormes2	Tormes3	Tormes3	Pirón1	Pirón1	Pirón2	Pirón2	Pirón3	Pirón3	Pirón4	Pirón4	Pirón5	Pirón5	Cega1	Cega1	Cega2	Cega2	Cega3	Cega3	Cega4	Cega4	Cega5	Cega5	Cega6	Cega6	Lozoya1	Lozoya1	Lozoya2	Lozoya2	Lozoya3	Lozoya3	Lozoya4	Lozoya4	Tagus-Peralejos	Tagus-Peralejos	Tagus-Poveda	Tagus-Poveda	Gallo	Gallo	Cabrillas
SCENARIO	RCP4.5	RCP8.5	RCP4.5	RCP8.5	RCP4.5	RCP8.5	RCP4.5	RCP8.5	RCP4.5	RCP8.5	RCP4.5	RCP8.5	RCP4.5	RCP8.5	RCP4.5	RCP8.5	RCP4.5	RCP8.5	RCP4.5	RCP8.5	RCP4.5	RCP8.5	RCP4.5	RCP8.5	RCP4.5	RCP8.5	RCP4.5	RCP8.5	RCP4.5	RCP8.5	RCP4.5	RCP8.5	RCP4.5	RCP8.5	RCP4.5	RCP8.5	RCP4.5	RCP8.5	RCP4.5	RCP8.5	RCP4.5	RCP8.5	RCP4.5	RCP8.5	RCP4.5	RCP8.5	RCP4.5	RCP8.5	RCP4.5
2006-01-01	N/A	N/A	N/A	N/A	N/A	N/A	N/A	N/A	N/A	N/A	N/A	N/A	N/A	N/A	N/A	N/A	N/A	N/A	N/A	N/A	N/A	N/A	N/A	N/A	N/A	N/A	N/A	N/A	N/A	N/A	N/A	N/A	N/A	N/A	N/A	N/A	N/A	N/A	N/A	N/A	N/A	N/A	N/A	N/A	N/A	N/A	N/A	N/A	N/A
2006-01-02	5.95251	5.90723	3.1434	3.11902	4.36028	4.34341	3.72193	3.67986	4.30834	4.27187	4.58056	4.53348	1.72179	1.68892	2.34706	2.33183	7.91688	7.9043	5.2064	5.14858	3.75313	3.69541	0.941707	0.952362	1.3035	1.3172	2.22712	2.222	3.5462	3.5274	4.53925	4.48564	5.1353	5.13089	1.96563	2.04066	2.21761	2.33077	2.81123	2.90088	3.68316	3.77271	6.43119	6.47907	5.74765	5.84684	6.4604	6.4689	8.16594
2006-01-03	6.07665	5.99674	3.10876	3.05743	4.26245	4.22651	3.79234	3.71557	4.36086	4.29516	4.64728	4.56375	1.80351	1.71459	2.34034	2.25571	7.95325	7.902	5.37343	5.22413	3.85879	3.6852	0.791665	0.751198	1.0912	1.03269	2.06564	1.9592	3.48714	3.3734	4.66422	4.51667	4.97577	4.87869	2.01407	1.99665	2.19304	2.1728	2.88278	2.85849	3.7851	3.75352	6.48299	6.40837	5.58404	5.55226	6.58591	6.47113	8.24207
2006-01-04	6.72059	6.7263	3.57483	3.56334	4.59508	4.56627	4.42676	4.42317	4.90065	4.89382	5.32764	5.31655	2.2499	2.18792	2.81507	2.74071	8.24896	8.21061	6.12269	6.02398	4.73224	4.60218	1.03549	0.974469	1.43376	1.34661	2.64482	2.52557	4.09633	3.98855	5.40063	5.29621	5.49611	5.38544	2.58518	2.53318	2.98594	2.95222	3.58353	3.52213	4.51087	4.45176	7.19742	7.06865	6.20748	6.03699	7.61308	7.44256	8.71469
2006-01-05	6.73424	6.86634	3.72429	3.81189	4.83826	4.89762	4.51083	4.63804	4.99445	5.10255	5.45797	5.59455	2.42788	2.4458	3.04284	3.05965	8.33514	8.35236	6.3869	6.42086	5.13865	5.16705	1.2986	1.29111	1.81606	1.80369	3.1181	3.11542	4.48031	4.49016	5.71066	5.73808	5.94751	5.94176	2.74898	2.80569	3.25288	3.34316	3.76014	3.83143	4.65216	4.72875	7.27766	7.22006	6.82915	6.72104	7.58557	7.5176	8.59554
2006-01-06	6.67557	6.80396	3.56127	3.66894	4.60981	4.69769	4.39345	4.52659	4.87675	4.99155	5.30041	5.44565	2.62634	2.56485	3.26905	3.19273	8.53208	8.46188	6.7463	6.63354	5.47607	5.37587	1.30379	1.30611	1.80299	1.8153	3.20802	3.18924	4.66381	4.61052	6.01728	5.92483	5.99804	5.9938	2.76385	2.84188	3.26815	3.40023	3.79118	3.88393	4.70548	4.79582	7.26075	7.16905	6.57054	6.49467	7.62443	7.4912	8.65886
2006-01-07	6.67594	6.89381	3.65897	3.79257	4.77091	4.84669	4.44214	4.64559	4.93278	5.10299	5.37865	5.59195	2.68475	2.63962	3.34393	3.28642	8.50771	8.49079	6.80642	6.74183	5.65963	5.55209	1.50407	1.42731	2.10581	1.99317	3.54143	3.40563	4.8868	4.78092	6.13769	6.05739	6.33366	6.20251	2.9011	3.09429	3.48785	3.79118	3.95052	4.18754	4.85448	5.09662	7.31164	7.25983	6.72879	6.61828	7.66821	7.6105	8.65846
2006-01-08	6.33137	6.68918	3.39508	3.64356	4.55507	4.73909	4.0922	4.44341	4.62939	4.93076	4.992	5.37474	2.42762	2.51079	3.05068	3.14006	8.32672	8.38812	6.3783	6.52089	5.15182	5.3094	1.33685	1.3709	1.87294	1.91886	3.17412	3.26404	4.51253	4.61657	5.71418	5.84944	6.00417	6.08193	2.75112	3.08624	3.09335	3.42955	3.76509	4.17142	4.66132	5.07095	7.07753	7.19512	6.55173	6.62225	7.32413	7.50161	8.49327
2006-01-09	6.3419	6.69994	3.33093	3.60396	4.45528	4.66609	4.07007	4.43045	4.60316	4.91255	4.95635	5.34799	2.45146	2.55195	3.05691	3.17726	8.37798	8.45093	6.44587	6.61149	5.15113	5.35163	1.2247	1.29984	1.70282	1.80717	3.0182	3.17448	4.43901	4.59355	5.73867	5.90415	5.84085	5.98135	2.79437	3.08843	3.08845	3.3299	3.82711	4.17916	4.7399	5.08636	7.14643	7.35881	6.39061	6.65003	7.48047	7.76736	8.60438
2006-01-10	6.56096	6.71677	3.50693	3.65872	4.60062	4.74604	4.29537	4.46836	4.79828	4.95142	5.20436	5.40054	2.59866	2.64607	3.23572	3.29343	8.4698	8.4996	6.67958	6.75491	5.4609	5.56053	1.37364	1.42141	1.91532	1.98341	3.30668	3.39923	4.69837	4.78173	5.98667	6.06647	6.10862	6.19444	2.95568	3.0013	3.40541	3.53788	4.01783	4.06769	4.92397	4.96548	7.39102	7.49699	6.73942	6.93946	7.79787	7.9227	8.73364
2006-01-11	6.2266	6.61338	3.41113	3.56678	4.61654	4.66368	4.02643	4.35784	4.57782	4.85466	4.92563	5.27709	2.33942	2.66531	2.97763	3.31588	8.25949	8.52142	6.21597	6.79089	5.00279	5.59105	1.36015	1.41735	1.90984	1.97488	3.16239	3.4006	4.45307	4.79565	5.57468	6.09532	6.00345	6.19145	2.67657	3.03142	3.08688	3.60872	3.66835	4.11215	4.55159	5.02238	7.08919	7.68276	6.65895	7.09198	7.31601	8.19281	8.47417
2006-01-12	5.78923	6.46119	3.00358	3.48505	4.23288	4.6235	3.54869	4.21998	4.15579	4.73951	4.38484	5.1323	2.19522	2.58552	2.76815	3.22606	8.19321	8.44089	6.0153	6.64505	4.65177	5.4574	1.07639	1.42107	1.49815	1.98875	2.67926	3.37292	4.08159	4.7267	5.31862	5.97259	5.54002	6.17972	2.54109	3.09541	2.78716	3.47692	3.52019	4.18419	4.43065	5.08629	6.97177	7.5975	6.22933	7.17439	7.23125	8.02934	8.48926
2006-01-13	5.77097	6.59035	2.98045	3.49254	4.20905	4.55562	3.52621	4.30634	4.1357	4.80194	4.35923	5.2059	2.1565	2.61426	2.76461	3.25296	8.15378	8.4974	5.9257	6.71425	4.61676	5.47553	1.18002	1.34649	1.65064	1.87159	2.80786	3.27095	4.13528	4.68939	5.26499	6.00644	5.67224	6.06769	2.52333	3.16932	2.82973	3.76466	3.48853	4.27701	4.38003	5.18394	7.07003	7.55349	6.38603	6.99212	6.8855	7.17158	8.53376
2006-01-14	5.96105	7.00813	3.04886	3.83765	4.23034	4.82942	3.68754	4.73609	4.27231	5.17093	4.53486	5.67161	2.09529	2.79139	2.66681	3.47244	8.12512	8.63097	5.84421	7.00477	4.46161	5.82925	1.0384	1.48692	1.44568	2.06537	2.57335	3.55532	3.95931	4.96821	5.15509	6.29706	5.4471	6.3225	2.45867	3.32778	2.67077	3.68459	3.41772	4.4666	4.32226	5.36971	7.01336	7.56329	6.3895	7.04353	7.05865	7.66347	8.48138
2006-01-15	6.11656	7.21967	3.22232	4.02551	4.40567	4.98885	3.86971	4.95995	4.43498	5.36488	4.74334	5.91726	2.16494	2.88	2.74792	3.58302	8.16623	8.69224	5.95523	7.14685	4.60782	6.01199	1.10509	1.57117	1.54144	2.1838	2.70542	3.71904	4.07875	5.11954	5.27274	6.44447	5.57014	6.47234	2.41855	3.40928	2.54925	4.04586	3.36268	4.56322	4.25414	5.46308	6.88749	7.66631	6.23437	7.10467	7.08996	8.16214	8.4134
2006-01-16	6.00965	7.13286	3.16064	3.98358	4.36327	4.9942	3.76921	4.88867	4.34844	5.31111	4.63241	5.85443	2.10658	2.85252	2.70197	3.54631	8.12582	8.65531	5.84899	7.09511	4.50723	5.97078	1.11761	1.57756	1.56068	2.19859	2.69229	3.72034	4.03718	5.10048	5.17949	6.40492	5.56334	6.48144	2.28823	3.11505	2.41029	3.62004	3.20646	4.2007	4.09826	5.09148	6.78127	7.3818	6.0927	6.99652	6.95009	7.71576	8.36019
2006-01-17	5.69871	6.76779	3.03594	3.72899	4.29714	4.82643	3.49719	4.53492	4.11303	5.0128	4.32601	5.48027	2.00551	2.67174	2.59316	3.32844	8.06686	8.49881	5.68438	6.78522	4.3011	5.63323	1.04158	1.49339	1.45129	2.09079	2.52947	3.51967	3.88184	4.86598	5.00996	6.1161	5.41258	6.31384	2.15071	2.84726	2.36462	3.29574	3.03609	3.88472	3.91601	4.78737	6.68555	7.02893	5.97731	6.45889	6.82108	7.26723	8.31012
2006-01-18	5.91503	7.47488	2.92605	4.18365	4.0739	4.93427	3.6013	5.16093	4.18936	5.49952	4.42678	6.05678	2.2961	3.1119	2.86552	3.95666	8.29269	9.04328	6.20645	7.56457	4.81127	6.35944	1.03563	1.59373	1.42983	2.1518	2.66515	3.79026	4.13824	5.33589	5.47253	6.76524	5.5079	6.46163	2.35016	3.66524	2.46021	3.86374	3.29693	4.88053	4.21915	5.78558	6.70865	7.63828	5.92675	6.74627	6.87205	8.2077	8.34181
2006-01-19	6.52698	8.77045	3.48139	5.45615	4.58111	5.92351	4.26132	6.53851	4.76907	6.67191	5.1674	7.51806	2.6048	3.72083	3.24325	4.77921	8.47326	9.51287	6.6891	8.52543	5.47422	7.60077	1.38083	2.22367	1.92569	3.01702	3.32022	4.95483	4.71002	6.40631	5.99715	7.75876	6.12135	7.5118	2.72026	4.6434	2.86405	4.90693	3.73465	6.02948	4.64255	6.87793	6.85724	8.39484	6.07696	7.93547	7.08006	9.15547	8.42962
2006-01-20	6.72568	8.88115	3.62293	5.54347	4.67948	6.12494	4.45586	6.68848	4.9341	6.82862	5.37509	7.74001	2.6177	3.64975	3.25926	4.60824	8.47969	9.33047	6.7086	8.39593	5.50314	7.5372	1.39822	2.23791	1.95095	3.08519	3.35213	5.00259	4.73643	6.36982	6.0195	7.68921	6.15169	7.60738	3.00179	4.46134	3.26739	4.80149	4.07871	5.81177	4.99254	6.66801	7.21701	8.47788	6.42331	8.27265	7.5897	9.20859	8.66295
2006-01-21	6.52353	8.8052	3.57456	5.47555	4.72324	6.01112	4.30209	6.59236	4.81456	6.73353	5.22903	7.60946	2.45793	3.69624	3.08653	4.74548	8.34504	9.49344	6.42659	8.48676	5.21545	7.55092	1.36634	2.19802	1.91518	2.98203	3.23211	4.90788	4.56493	6.36307	5.76531	7.71889	6.0581	7.46966	2.82562	4.46097	3.27073	4.82338	3.84818	5.8149	4.73259	6.67412	7.18917	8.48689	6.67394	8.20751	7.47833	9.23935	8.55933
2006-01-22	6.40688	8.61724	3.36917	5.28681	4.47668	5.94681	4.13029	6.41426	4.65365	6.59988	5.01982	7.45891	2.57356	3.76972	3.20326	4.80678	8.4913	9.48826	6.65945	8.59554	5.37134	7.73987	1.26307	2.31289	1.74715	3.16366	3.12525	5.13313	4.58171	6.5327	5.93099	7.86172	5.9243	7.69825	2.65444	4.273	2.79138	4.56023	3.65673	5.58929	4.56706	6.45496	7.21623	8.45117	6.5134	8.21966	7.56501	9.17791	8.63349
2006-01-23	6.95588	7.8064	3.76764	4.58625	4.73993	5.51417	4.66631	5.60492	5.10453	5.93342	5.58345	6.64396	3.00836	3.38524	3.76538	4.22198	8.84914	9.04514	7.37426	7.95394	6.226	7.05589	1.60265	2.06526	2.20588	2.8772	3.80271	4.66943	5.25938	5.99312	6.63512	7.28413	6.5209	7.3418	3.23291	3.7813	3.77275	4.26415	4.36142	5.00271	5.27791	5.88541	7.71633	8.01533	7.00432	7.82015	8.27119	8.5584	8.98521
2006-01-24	7.16759	7.6674	4.00797	4.3857	5.00848	5.19665	4.92192	5.39755	5.33871	5.72348	5.88863	6.35539	3.11074	3.30006	3.87708	4.16242	8.86626	9.10116	7.52068	7.84749	6.478	6.79927	1.77482	1.85501	2.4654	2.54347	4.11754	4.28364	5.49961	5.73162	6.82357	7.10334	6.83131	6.94253	3.49723	3.855	4.12488	4.36455	4.66647	5.09896	5.56143	5.98881	8.00037	7.95083	7.56836	7.46048	8.59818	8.54359	9.08932
2006-01-25	6.89802	7.86485	3.80888	4.58798	4.87151	5.42024	4.65649	5.62771	5.11444	5.93354	5.60758	6.62941	2.87601	3.45823	3.57427	4.36707	8.64963	9.21092	7.1225	8.09679	6.0392	7.12905	1.64373	2.02274	2.29875	2.77878	3.833	4.59856	5.17803	6.01521	6.45168	7.36626	6.59449	7.23148	3.13585	3.91463	3.34551	4.38556	4.22608	5.1652	5.11727	6.04756	7.56399	8.1762	7.28708	7.7517	7.94417	8.84245	8.7281
2006-01-26	6.40099	7.53166	3.50195	4.32167	4.67422	5.26378	4.18653	5.30163	4.71551	5.66556	5.10261	6.30123	2.53661	3.29252	3.17753	4.11029	8.39514	8.99882	6.55425	7.81191	5.37673	6.85032	1.43213	1.94899	2.00875	2.70796	3.36674	4.45201	4.69183	5.81044	5.8969	7.12383	6.18196	7.13522	2.60137	3.60418	2.99964	4.07538	3.57622	4.79173	4.45592	5.68037	6.96862	7.86312	6.49752	7.62046	7.15734	8.35653	8.41358
2006-01-27	6.16996	7.52781	3.21679	4.27035	4.37449	5.13754	3.90366	5.2625	4.46087	5.61476	4.77579	6.22446	2.47545	3.31924	3.0867	4.18969	8.39033	9.11936	6.48231	7.87872	5.20456	6.83605	1.25626	1.87098	1.74857	2.5642	3.0763	4.31358	4.48746	5.76194	5.78009	7.13354	5.89598	6.9681	2.24503	3.68278	2.5607	4.10886	3.15202	4.89367	4.03829	5.78986	6.82531	7.91367	6.07154	7.35428	7.02845	8.50908	8.40321
2006-01-28	6.27737	7.13668	3.32182	4.06154	4.47519	5.12777	4.02307	4.93152	4.56658	5.36065	4.9112	5.92436	2.55082	3.12118	3.18083	3.87789	8.42786	8.82066	6.59586	7.51775	5.374	6.54187	1.35956	1.86755	1.89859	2.61287	3.26507	4.27272	4.64318	5.58904	5.91071	6.85885	6.07554	6.9958	2.21595	3.25487	2.33266	3.76861	3.12317	4.36292	4.02193	5.24298	7.04114	7.61746	6.26516	7.33311	7.33748	8.0214	8.54268
2006-01-29	6.50741	6.57815	3.43427	3.55292	4.51681	4.66306	4.22575	4.32851	4.73393	4.83104	5.12057	5.24788	2.74601	2.82414	3.41941	3.51096	8.62148	8.63277	6.94099	7.0481	5.71721	5.91507	1.40578	1.55703	1.94422	2.17069	3.4102	3.67797	4.85807	5.0575	6.21407	6.35876	6.18015	6.44403	2.55946	2.88634	2.76478	3.42114	3.5484	3.93419	4.46918	4.84057	7.45393	7.40445	6.72242	6.82273	7.90722	7.79865	8.80404
2006-01-30	6.68981	6.50695	3.62771	3.48566	4.71316	4.59989	4.4361	4.25045	4.92226	4.76218	5.36289	5.15977	2.86322	2.84421	3.55956	3.53865	8.66246	8.66962	7.1122	7.09037	5.99302	5.93636	1.58799	1.53331	2.21334	2.12989	3.74059	3.64677	5.11899	5.05513	6.42281	6.3842	6.50006	6.40526	2.67723	2.93105	2.88007	3.38349	3.67513	3.98776	4.56958	4.89342	7.55937	7.49676	7.06356	6.90203	7.99452	7.93202	8.79647
2006-01-31	6.49418	6.0333	3.51425	3.31924	4.64994	4.55721	4.25526	3.85139	4.77048	4.42575	5.17188	4.7282	2.66485	2.54178	3.32092	3.19975	8.49208	8.38469	6.77262	6.54779	5.62164	5.41215	1.49383	1.50729	2.09209	2.11984	3.51735	3.47908	4.86012	4.76032	6.29328	5.91137	6.31283	6.29431	3.21134	2.71637	3.4364	2.7885	5.0459	3.99345	6.13742	4.98916	7.31726	6.94018	6.83894	6.62175	7.64902	7.07898	8.70266
2006-02-01	6.78524	5.68284	3.61682	2.87138	4.61325	4.09701	4.48627	3.41873	4.94882	4.03966	5.38643	4.23666	2.87713	2.31407	3.6005	2.90379	8.76506	8.27005	7.16787	6.20961	5.94843	4.89298	1.46076	1.16867	2.00431	1.62905	3.53416	2.87235	5.0209	4.26725	6.58479	5.51563	6.2719	5.71682	3.49329	2.43961	3.71342	3.14536	5.40177	3.72649	6.45956	4.77698	7.62663	6.85133	6.88424	5.97497	8.15298	7.09645	8.92694
2006-02-02	7.00481	5.76883	3.89267	3.01356	4.93633	4.2516	4.76468	3.53834	5.20719	4.1476	5.72475	4.37362	3.07529	2.28039	3.83018	2.88648	8.83455	8.23287	7.46174	6.13654	6.41007	4.8546	1.74988	1.2293	2.43269	1.72013	4.06718	2.94391	5.44681	4.28839	6.76701	5.46886	6.78814	5.7935	3.74377	2.48673	4.02562	2.79101	5.69469	3.69168	6.76256	4.72002	7.60825	6.83624	7.22528	6.23125	8.03405	7.00588	8.79281
2006-02-03	6.68088	5.71801	3.64733	2.93348	4.75006	4.16562	4.43987	3.46934	4.929	4.08555	5.37308	4.29492	2.94801	2.34096	3.66633	2.92792	8.72943	8.29834	7.25186	6.26238	6.1606	4.9325	1.65302	1.14932	2.30206	1.59824	3.87241	2.85616	5.25046	4.27517	6.561	5.55692	6.61699	5.69571	3.44656	2.42258	3.6785	2.60207	5.31535	3.69458	6.33917	4.73013	7.3538	6.80322	6.83562	6.03664	7.7108	7.00073	8.65762
2006-02-04	7.42147	6.07011	4.13502	3.0915	4.9074	4.2402	5.10798	3.7801	5.45678	4.34903	6.0054	4.6318	3.39916	2.63582	4.36623	3.27957	9.30268	8.52379	8.02357	6.75476	6.92084	5.50887	1.86325	1.34146	2.50773	1.86077	4.28331	3.27103	5.8136	4.7045	7.22038	6.03821	6.89069	6.06237	4.18857	2.77894	4.41381	3.04769	6.24527	4.23518	7.30777	5.27806	7.93893	7.0598	7.18014	6.26857	8.59483	7.36769	9.16113
2006-02-05	7.54919	6.37832	4.38102	3.39468	5.36777	4.53199	5.3465	4.1236	5.71498	4.65334	6.37091	5.02165	3.38534	2.7672	4.21786	3.44074	9.0327	8.5943	7.95027	6.95676	7.06533	5.79732	2.08153	1.5031	2.90415	2.09459	4.69721	3.57264	6.00752	4.96036	7.28852	6.26376	7.37234	6.34736	4.22326	2.9665	4.77858	3.31676	6.26783	4.3861	7.30588	5.42233	7.93543	7.23682	7.69053	6.5893	8.45888	7.57965	9.04242
2006-02-06	7.11468	7.42235	3.93907	4.13112	4.9242	4.87087	4.85303	5.09866	5.27397	5.44166	5.8033	5.98037	3.16204	3.32595	3.9584	4.27033	8.94693	9.25162	7.61563	7.90892	6.55165	6.76814	1.77011	1.78341	2.44399	2.39605	4.11927	4.13507	5.53976	5.68091	6.89374	7.09902	6.81469	6.75479	4.0163	3.91101	4.45083	4.42519	6.00676	5.81997	7.11969	6.84042	7.60533	8.02187	7.16859	7.23867	8.04392	8.71656	9.5706
2006-02-07	6.97506	8.13813	3.87206	4.83771	4.92314	5.61409	4.73598	5.91402	5.18307	6.17744	5.69457	6.93442	3.11592	3.65437	3.882	4.6293	8.86432	9.3614	7.52709	8.40789	6.49296	7.52892	1.78772	2.22096	2.48533	3.0517	4.14041	4.9686	5.5154	6.35704	6.83406	7.6871	6.85456	7.56545	3.80251	4.43248	4.15706	5.00481	5.76893	6.33452	6.83276	7.32238	7.38604	8.419	6.88569	8.14614	7.75157	9.14333	9.6379
2006-02-08	6.61129	7.82275	3.60426	4.55886	4.7232	5.41852	4.37422	5.59153	4.8735	5.90703	5.30304	6.59964	2.91137	3.46494	3.61847	4.35606	8.68744	9.17619	7.18588	8.09947	6.09946	7.16905	1.64871	2.06506	2.30139	2.85166	3.85351	4.67844	5.21403	6.06012	6.50577	7.39104	6.60707	7.32009	3.54651	4.22841	3.84212	4.7552	5.45731	6.06591	6.51536	7.06001	7.28841	8.05566	6.6967	7.85135	7.63781	8.61745	9.72624
2006-02-09	6.40792	7.60632	3.41974	4.36301	4.55397	5.25746	4.15472	5.36283	4.68053	5.71014	5.05636	6.35153	2.7453	3.28014	3.41407	4.10184	8.56705	9.00964	6.9152	7.79774	5.76414	6.81072	1.51008	1.91322	2.10837	2.65132	3.57533	4.38777	4.94659	5.76807	6.23169	7.0967	6.35557	7.06855	3.17489	3.86764	3.56886	4.30699	4.95062	5.59998	5.95837	6.60612	7.14897	7.56935	6.58469	7.20479	7.43446	7.97448	9.47295
2006-02-10	6.57436	7.25144	3.4937	4.10118	4.56955	5.10898	4.29717	5.02152	4.79634	5.42916	5.20009	6.00591	2.92964	3.27713	3.66125	4.11723	8.7842	9.05262	7.24618	7.80427	6.07	6.77332	1.53551	1.86177	2.11498	2.56405	3.67258	4.29551	5.13221	5.71915	6.50763	7.07643	6.40576	6.96615	3.23579	3.61619	3.58805	4.48632	5.08011	5.33882	6.12138	6.34682	7.13722	7.50679	6.45856	6.90651	7.4475	7.9476	9.48142
2006-02-11	6.95388	6.7156	3.79004	3.70003	4.78932	4.81161	4.67892	4.4873	5.12145	4.973	5.60895	5.43027	3.19038	3.17256	3.99714	3.95257	8.9726	8.89977	7.66214	7.6161	6.60638	6.61322	1.79253	1.84929	2.47348	2.57308	4.16266	4.25717	5.58387	5.61869	6.93886	6.92957	6.8521	6.96311	3.65709	3.32443	4.06224	4.54682	5.60235	4.98814	6.6644	5.99242	7.57022	7.33198	6.82424	6.86959	8.07461	7.66561	10.2293
2006-02-12	7.54343	6.6166	4.27016	3.53155	5.10009	4.60338	5.26527	4.3424	5.60935	4.8359	6.2115	5.25052	3.41836	3.04982	4.33244	3.80186	9.21533	8.83048	8.03973	7.42574	7.02506	6.3469	1.95401	1.70531	2.67121	2.36563	4.46776	3.98645	5.91853	5.38565	7.28875	6.72005	7.09903	6.70855	4.08038	3.50067	4.38744	4.50732	6.09771	5.37532	7.13192	6.40431	8.01175	7.4785	7.49856	6.77327	8.63478	7.93499	10.4015
2006-02-13	7.77164	6.56547	4.50855	3.57512	5.36891	4.70373	5.53425	4.3305	5.85602	4.83629	6.53407	5.25592	3.58744	2.99796	4.55558	3.73106	9.33866	8.77441	8.30643	7.33586	7.37406	6.25523	2.13124	1.68409	2.91753	2.34236	4.79832	3.93777	6.21898	5.32157	7.56749	6.64055	7.40002	6.67236	4.19412	3.41654	4.5467	3.99427	6.23478	5.18661	7.26762	6.18819	8.07362	7.55276	7.71979	7.06163	8.68097	7.984	9.91376
2006-02-14	7.74171	6.08593	4.47002	3.28348	5.31097	4.49756	5.4926	3.87421	5.81471	4.44349	6.47778	4.75344	3.76865	2.73034	4.84802	3.40089	9.55553	8.53035	8.60104	6.87508	7.69464	5.76219	2.27097	1.56672	3.0796	2.1968	5.04002	3.65585	6.4875	4.98113	7.83442	6.21673	7.58621	6.44253	4.34274	3.0573	4.78597	3.20335	6.39991	4.74384	7.41559	5.73531	8.17807	7.08268	7.76399	6.68299	8.84245	7.29906	10.1047
2006-02-15	7.4048	6.08405	4.23395	3.10321	5.22026	4.2504	5.18247	3.79472	5.56841	4.36179	6.1823	4.64808	3.6034	2.79415	4.53041	3.4837	9.26332	8.67112	8.31611	7.02404	7.46352	5.80368	2.21912	1.427	3.07089	1.96876	4.96827	3.45855	6.31528	4.91901	7.62432	6.28865	7.58947	6.21752	3.89805	3.12602	4.53326	3.3417	5.78626	4.81554	6.77609	5.84125	7.86724	7.31093	7.61931	6.44051	8.3637	7.74191	9.60464
2006-02-16	6.61068	6.41199	3.67639	3.41203	4.8284	4.54022	4.4063	4.15386	4.90804	4.67864	5.34898	5.05353	3.1015	2.97932	3.85364	3.70862	8.80896	8.76582	7.48698	7.30768	6.49967	6.21325	1.8455	1.65921	2.58125	2.30599	4.23098	3.89171	5.55256	5.28358	6.82546	6.60808	6.95676	6.62836	3.22653	3.23081	3.76904	3.62764	5.01151	4.94786	6.00167	5.94809	7.41128	7.55389	6.98533	7.03524	7.76781	7.99274	9.09695
2006-02-17	6.34823	6.53312	3.325	3.48077	4.44242	4.57619	4.07138	4.26492	4.603	4.77145	4.9556	5.17005	2.9133	3.08844	3.62667	3.86401	8.7247	8.89513	7.20383	7.49869	6.07307	6.39922	1.5878	1.69567	2.20414	2.33969	3.75599	3.97775	5.16344	5.41062	6.49668	6.77157	6.50213	6.68522	3.03676	3.31516	3.35875	3.63639	4.79682	5.15479	5.81899	6.18362	7.3115	7.68775	6.68912	7.11397	7.67828	8.19544	8.93303
2006-02-18	6.64902	6.81538	3.56528	3.68205	4.63729	4.7121	4.37949	4.54036	4.86905	5.00412	5.29315	5.46198	3.00323	3.27303	3.74424	4.11338	8.80278	9.05289	7.35302	7.79849	6.24686	6.76265	1.6526	1.85437	2.29008	2.55261	3.88695	4.28174	5.29889	5.70899	6.64099	7.06853	6.61549	6.95229	3.39306	3.89071	3.91365	4.05805	5.22165	5.8847	6.24632	6.94778	7.45057	7.73039	6.82549	7.26696	7.87487	8.2269	8.8039
2006-02-19	6.58871	6.60485	3.58327	3.64575	4.70366	4.78757	4.34962	4.38878	4.85182	4.89066	5.27532	5.32636	2.93969	3.09171	3.65454	3.84299	8.7147	8.81177	7.23478	7.47522	6.15105	6.4714	1.6609	1.81953	2.31603	2.54165	3.88244	4.18603	5.2498	5.52153	6.55023	6.80589	6.6301	6.91145	3.32641	3.75009	4.00475	4.09428	5.10606	5.69646	6.10426	6.73752	7.30087	7.55265	6.82206	7.10613	7.62608	7.97225	8.62798
2006-02-20	6.86117	6.24969	3.68099	3.30254	4.66351	4.46046	4.56462	3.99578	5.01586	4.54305	5.47078	4.88121	3.29237	2.85	4.19557	3.54312	9.17612	8.65279	7.84937	7.0907	6.73119	5.9663	1.78214	1.57672	2.41321	2.19767	4.14143	3.71815	5.65579	5.09751	7.06231	6.40101	6.78091	6.47979	3.68828	3.53823	4.8167	3.75545	5.63449	5.45303	6.68682	6.5356	7.55301	7.50083	6.81668	6.93507	8.04791	7.93025	8.91292
2006-02-21	7.32542	6.52199	4.11114	3.43682	5.04847	4.51065	5.06613	4.23604	5.45423	4.74136	6.02851	5.1292	3.59634	3.04662	4.55694	3.81895	9.32665	8.88739	8.31756	7.43812	7.40428	6.29727	2.1544	1.62839	2.95645	2.23816	4.84364	3.85353	6.24833	5.31495	7.58875	6.69483	7.44865	6.56284	4.17344	3.67885	5.21235	4.13252	6.21258	5.6257	7.24912	6.69467	8.19469	7.67518	7.63359	7.09318	8.90229	8.17988	9.28427
2006-02-22	7.83486	6.89208	4.53478	3.75501	5.28433	4.78047	5.56443	4.62458	5.85962	5.07837	6.5205	5.55692	3.85336	3.26234	5.00653	4.09148	9.68436	9.02726	8.73796	7.77729	7.82709	6.75283	2.32974	1.86184	3.13434	2.56922	5.12709	4.29442	6.60143	5.7069	7.94714	7.05696	7.63813	6.97108	4.58248	3.96208	5.48828	4.42452	6.69099	5.96721	7.70176	7.03853	8.76307	7.81471	8.44302	7.32727	9.63037	8.35169	9.67712
2006-02-23	8.08166	7.13382	4.78348	3.94403	5.56409	4.91318	5.85208	4.86592	6.12302	5.28213	6.86502	5.81158	3.96851	3.32823	5.10304	4.18482	9.68308	9.09192	8.91227	7.88588	8.11902	6.87714	2.49745	1.91144	3.40062	2.63247	5.46211	4.38939	6.85813	5.80677	8.16994	7.16007	7.97773	7.05076	4.66919	4.19482	5.57911	4.40875	6.78154	6.24422	7.77811	7.29836	8.6421	8.07634	8.57559	7.57954	9.40287	8.72104	9.4314
2006-02-24	7.48438	6.71931	4.3156	3.76426	5.30274	4.9043	5.27322	4.51896	5.64962	5.00642	6.28689	5.47474	3.65936	3.24403	4.61355	4.0513	9.32353	8.97296	8.40857	7.73715	7.5661	6.74401	2.25949	1.89024	3.12017	2.62288	5.04374	4.34183	6.39786	5.71672	7.70993	7.04054	7.65041	7.03109	4.16532	3.75854	4.83296	4.60082	6.1773	5.70069	7.18483	6.72447	8.16648	7.85585	7.97982	7.58537	8.76854	8.35352	9.10868
2006-02-25	6.50411	6.39586	3.63042	3.36353	4.80814	4.47447	4.31298	4.1205	4.82902	4.64559	5.24792	5.00975	3.13067	3.09716	3.88928	3.86019	8.82426	8.8579	7.53172	7.49938	6.56396	6.44907	1.8818	1.75986	2.63386	2.44404	4.29866	4.08922	5.60973	5.47467	6.87565	6.80062	7.02083	6.80493	3.35383	3.444	3.94707	4.04196	5.1758	5.33833	6.16614	6.39473	7.61422	7.55843	7.30469	7.09301	8.02339	7.9853	8.76097
2006-02-26	6.07677	6.73752	3.15127	3.62274	4.3237	4.6697	3.81145	4.46284	4.38123	4.93838	4.67423	5.37947	2.95655	3.21881	3.68571	4.04801	8.77228	9.02489	7.27921	7.71499	6.14873	6.64324	1.6037	1.78819	2.22076	2.45648	3.79379	4.15743	5.21535	5.60369	6.56269	6.97508	6.52936	6.83449	3.10599	3.88778	3.51838	4.18759	4.90428	5.87862	5.93468	6.97546	7.3423	7.69386	6.791	7.09351	7.70321	8.21089	8.65848
2006-02-27	6.44341	7.31382	3.38093	4.06689	4.47209	4.95137	4.15919	5.02876	4.67623	5.40966	5.04729	5.96307	3.16226	3.62813	3.96537	4.66255	8.96328	9.45609	7.6202	8.38123	6.54082	7.40243	1.7524	2.11748	2.41373	2.86559	4.08793	4.75619	5.52406	6.23306	6.88865	7.6022	6.77953	7.32662	3.24332	4.59667	3.93634	4.82056	4.98891	6.7088	6.00295	7.80898	7.39918	8.06163	6.77123	7.54593	7.80323	8.70523	8.72122
2006-02-28	6.98765	7.45659	3.80354	4.25282	4.78048	5.203	4.70472	5.22097	5.13981	5.59522	5.62951	6.21185	3.53221	3.77644	4.51643	4.81761	9.35629	9.49631	8.22742	8.60648	7.22316	7.75175	2.03288	2.31801	2.75952	3.1696	4.60629	5.14202	6.08032	6.54262	7.45549	7.87162	7.20209	7.70509	3.6728	4.51718	4.57756	4.85602	5.48458	6.62159	6.5033	7.68085	7.90492	8.06622	7.23848	7.74807	8.52403	8.66148	9.10064
2006-03-01	7.15199	7.25024	3.99286	4.06265	4.99406	5.03331	4.90465	4.99849	5.32342	5.40084	5.86906	5.96456	3.674	3.56192	4.66592	4.48535	9.39464	9.25176	8.44173	8.2542	7.55733	7.36567	2.22763	2.15974	3.05407	2.98169	4.9787	4.8566	6.37823	6.22654	7.7127	7.54942	7.56712	7.48032	3.75462	4.35364	4.50834	4.54015	5.33897	6.42324	6.36937	7.50852	7.98841	7.97156	7.66056	7.57428	8.55473	8.54888	9.0369
2006-03-02	7.66473	7.11232	4.37161	3.963	5.1378	4.97392	5.37895	4.86554	5.69747	5.29052	6.31442	5.82798	3.8048	3.32641	4.9073	4.16417	9.59865	9.0494	8.65898	7.87312	7.75873	6.90155	2.30119	1.95211	3.11495	2.7034	5.09096	4.46271	6.54255	5.84216	7.88737	7.17108	7.6258	7.13424	4.33272	4.2971	5.12779	4.32296	6.267	6.35396	7.26251	7.44419	8.43264	7.91263	7.91168	7.50596	9.22265	8.46852	9.72162
2006-03-03	8.5245	7.41226	5.20058	4.15504	5.77022	5.02019	6.28657	5.13156	6.46741	5.49738	7.27252	6.07297	4.32909	3.56547	5.79935	4.57657	10.2252	9.40639	9.47223	8.28258	8.67743	7.27551	2.79922	2.05241	3.6946	2.77686	5.88417	4.63696	7.36856	6.1231	8.63653	7.50063	8.24082	7.21969	4.8837	4.74815	5.9532	4.93668	6.81053	6.86502	7.78201	7.98948	9.062	8.30392	8.83623	7.79211	10.0168	9.04207	9.9496
2006-03-04	8.34604	7.39001	5.03917	4.2177	5.80637	5.20278	6.14432	5.16498	6.38119	5.55254	7.19535	6.16172	4.2191	3.63236	5.42522	4.58689	9.84635	9.32065	9.30258	8.36896	8.649	7.49947	2.78013	2.21751	3.79994	3.0558	5.98764	4.96424	7.32112	6.33681	8.58924	7.65953	8.46388	7.57132	4.65365	4.22107	5.44461	4.52532	6.64643	6.26081	7.61779	7.2894	8.77225	8.13992	8.82741	7.96429	9.55387	8.72844	9.5078
2006-03-05	7.79684	7.04897	4.53858	3.90431	5.40869	4.92045	5.56681	4.79687	5.88716	5.23028	6.57571	5.75115	3.78643	3.47506	4.81172	4.38149	9.47147	9.20826	8.61802	8.12057	7.79279	7.17355	2.3501	2.05296	3.2261	2.82611	5.20721	4.65573	6.58231	6.05703	7.89982	7.39922	7.77725	7.2895	4.16363	3.91247	5.11574	4.10862	5.97732	5.89802	6.97485	6.98709	8.3117	7.8042	8.12001	7.41976	8.97329	8.31033	9.34432
2006-03-06	8.10895	7.35542	4.7938	4.1088	5.46343	4.99455	5.84755	5.07617	6.09585	5.45227	6.81118	6.01815	4.10953	3.74599	5.45492	4.84506	10.0091	9.58039	9.13669	8.56887	8.26497	7.62166	2.56442	2.22453	3.39862	2.99901	5.49328	4.94264	6.99525	6.42213	8.30636	7.78113	7.91202	7.48083	4.69049	4.16562	5.45593	4.55502	6.61359	6.2124	7.59434	7.2814	8.60142	8.03408	8.19506	7.48563	9.42832	8.67495	9.97403
2006-03-07	8.57348	7.75031	5.24454	4.47469	5.8521	5.30627	6.35089	5.49859	6.53252	5.81808	7.36304	6.4806	4.35591	3.86289	5.71636	4.93972	10.0952	9.57103	9.51995	8.74353	8.83512	7.92296	2.86972	2.40328	3.86138	3.28354	6.09266	5.29738	7.48907	6.68991	8.7511	8.00958	8.49701	7.84187	5.2183	4.38968	6.07987	4.78932	7.32115	6.46776	8.26623	7.49301	8.81229	8.36775	8.66343	7.99422	9.6581	9.09685	10.6189
2006-03-08	9.45049	7.24659	6.21399	4.14509	6.39967	5.19125	7.24777	5.04183	7.25133	5.45512	8.21515	6.04375	4.73489	3.43374	6.47887	4.28566	10.6581	9.08389	10.0752	8.03249	9.40188	7.1529	3.24813	2.10814	4.23371	2.93574	6.58366	4.75224	8.04561	6.07281	9.21514	7.36311	8.80351	7.41565	5.79399	3.79269	6.65794	4.22583	7.85385	5.65862	8.76266	6.64652	9.12312	8.00634	8.94598	7.83139	10.089	8.54055	10.6482
2006-03-09	9.31798	6.66676	5.97085	3.621	6.49467	4.71703	7.16296	4.41818	7.24053	4.90834	8.26069	5.34598	4.6907	3.1088	6.19188	3.87557	10.3665	8.86799	10.0369	7.51861	9.50607	6.47169	3.23822	1.76867	4.35635	2.45577	6.74504	4.10676	8.08471	5.49255	9.28469	6.81932	9.07697	6.82017	5.60141	3.44685	6.40296	4.00782	7.62264	5.28148	8.55239	6.29554	9.0427	7.62284	9.0766	7.19278	9.93213	8.06684	10.034
2006-03-10	9.02986	6.42811	5.7087	3.46788	6.15998	4.61459	6.82492	4.19004	6.92437	4.7143	7.84053	5.10037	4.68343	2.94028	6.32782	3.65481	10.5334	8.71159	10.0106	7.23421	9.36646	6.1553	3.19658	1.66786	4.21268	2.32697	6.5606	3.89378	7.99165	5.25629	9.18386	6.55242	8.82827	6.64203	5.49804	3.29175	6.2316	3.84406	7.50504	5.12356	8.43959	6.13732	8.94377	7.39155	8.83973	6.89829	9.8283	7.7575	10.0696
2006-03-11	9.60568	6.33883	6.34914	3.34828	6.55832	4.48333	7.42427	4.07611	7.41307	4.61056	8.42767	4.9666	5.05506	2.93435	6.96182	3.65655	10.931	8.75295	10.5517	7.24243	10.0167	6.1058	3.62196	1.5875	4.71553	2.19928	7.20374	3.76121	8.61055	5.18176	9.70097	6.52707	9.33796	6.50116	5.79629	3.23801	6.40226	3.90362	7.83796	5.0724	8.75135	6.1064	9.31748	7.43632	9.18024	6.80082	10.3424	7.8575	10.5811
2006-03-12	9.53452	6.7067	6.20687	3.57537	6.60303	4.60902	7.37733	4.41922	7.4066	4.8967	8.45222	5.32426	5.06452	3.16956	6.86458	3.97901	10.824	8.97823	10.5902	7.63419	10.1338	6.54918	3.63611	1.74948	4.80443	2.40632	7.32976	4.08343	8.68079	5.52754	9.79034	6.89742	9.51522	6.77151	5.64327	3.47233	6.23923	3.83503	7.60883	5.20411	8.54223	6.22636	9.06353	7.81124	9.19439	7.19199	9.93821	8.38067	10.1091
2006-03-13	9.04045	6.77397	5.70302	3.72655	6.23148	4.81884	6.85373	4.53774	6.96542	5.01431	7.90702	5.48178	4.88762	3.15881	6.58429	3.9361	10.6551	8.8934	10.3265	7.59523	9.80461	6.58231	3.43532	1.83121	4.55323	2.54665	7.00487	4.22357	8.37643	5.59088	9.52882	6.90563	9.24301	6.93102	5.3232	3.76651	5.83704	4.12596	7.30215	5.72057	8.24905	6.79475	8.68938	7.61262	8.58435	7.29051	9.47785	8.0244	10.3166
2006-03-14	9.50167	7.11403	6.25223	3.88246	6.45812	4.79263	7.30785	4.8148	7.30862	5.22401	8.2925	5.72802	5.21129	3.43834	7.27049	4.39987	11.131	9.30116	10.7607	8.08156	10.247	7.02081	3.81272	1.92414	4.91226	2.60356	7.44322	4.40219	8.8522	5.90349	9.88325	7.29602	9.49745	7.01094	5.91892	4.03084	6.37162	4.67738	7.97187	6.04449	8.87217	7.14902	9.19037	7.93197	8.91164	7.24432	10.2012	8.56724	10.7515
2006-03-15	9.68095	7.34511	6.37079	4.16604	6.69513	5.14485	7.52728	5.11048	7.52657	5.50256	8.59415	6.09657	5.25097	3.60482	7.16202	4.5546	11.0009	9.30798	10.8652	8.32676	10.478	7.43784	3.85173	2.18285	5.07243	3.00494	7.67392	4.8989	9.00171	6.28227	10.0631	7.61151	9.80209	7.50887	5.859	4.10318	6.56938	4.37143	7.98228	6.11888	8.8886	7.14498	9.25544	8.11818	9.35426	7.79234	10.208	8.7363	10.0212
2006-03-16	8.77603	7.56542	5.44445	4.28969	6.13762	5.11362	6.60227	5.28773	6.77464	5.62814	7.68975	6.23472	4.70066	3.75425	6.18279	4.84447	10.3453	9.56896	10.0535	8.5805	9.54596	7.64978	3.25717	2.24249	4.39561	3.03079	6.79455	4.9809	8.11645	6.44725	9.31431	7.80153	9.13457	7.52273	4.84495	4.51683	5.6808	4.73205	6.46672	6.63015	7.46973	7.69476	8.79913	8.24316	8.81365	7.83259	9.60098	8.93245	9.87302
2006-03-17	8.31538	8.27985	4.99527	4.95931	5.68317	5.60033	6.08415	6.03106	6.31089	6.25381	7.09137	7.00975	4.41692	4.11239	5.82937	5.39106	10.1788	9.92282	9.61358	9.14229	8.93457	8.32966	2.92611	2.5961	3.92143	3.48165	6.17528	5.59337	7.58076	7.04429	8.83288	8.35071	8.55486	8.04127	4.50192	5.04655	5.3155	5.23098	6.08335	7.25645	7.10614	8.28859	8.51208	8.81583	8.32402	8.44731	9.25195	9.71368	9.73375
2006-03-18	7.96008	7.61737	4.69472	4.48256	5.55377	5.49636	5.74598	5.44131	6.04484	5.8052	6.77701	6.49026	4.21571	3.67263	5.46148	4.59206	9.90323	9.25142	9.30062	8.41178	8.60423	7.64826	2.74843	2.35112	3.73212	3.27637	5.90953	5.21367	7.28159	6.49312	8.5599	7.7599	8.36849	7.83807	4.11459	4.25883	5.04608	4.45266	5.61883	6.30065	6.65181	7.32755	8.2442	8.33861	8.01907	8.38378	8.88728	8.9508	9.66597
2006-03-19	8.12232	6.78401	4.80671	3.70543	5.47376	4.77788	5.86181	4.53373	6.10805	5.00682	6.82645	5.47027	4.30976	3.25545	5.719	4.07773	10.145	9.01097	9.44639	7.76349	8.68385	6.74645	2.79302	1.86708	3.71778	2.58041	5.91132	4.30302	7.36445	5.70582	8.63742	7.0494	8.29566	6.9835	4.5036	3.52588	5.31169	3.76211	6.01303	5.42854	7.04172	6.46655	8.42406	7.76787	8.01567	7.41075	9.18361	8.25213	9.53207
2006-03-20	8.52697	7.70979	5.19875	4.40687	5.82987	5.08415	6.30507	5.40261	6.49644	5.70014	7.32064	6.30265	4.36078	3.70104	5.71379	4.81212	10.0867	9.58771	9.52758	8.50116	8.85313	7.50335	2.87921	2.15594	3.87977	2.88799	6.11553	4.80377	7.50396	6.31814	8.76441	7.6914	8.52297	7.3381	4.85177	4.35232	5.53552	4.54427	6.38149	6.43595	7.38702	7.47752	8.59662	8.28586	8.36701	7.65959	9.37946	9.04486	9.59694
2006-03-21	8.1238	8.62913	4.83958	5.2996	5.66203	5.888	5.91521	6.40825	6.18823	6.57984	6.95585	7.42068	4.10789	4.18084	5.29648	5.49095	9.79516	9.98259	9.13088	9.24849	8.40033	8.46431	2.64389	2.66896	3.59936	3.57789	5.7281	5.72131	7.10327	7.16354	8.39483	8.45832	8.21554	8.15327	4.40909	5.17612	5.13032	5.3908	5.78221	7.39215	6.7937	8.37202	8.514	8.86608	8.3177	8.62166	9.25665	9.75413	9.5009
2006-03-22	7.64978	8.66269	4.40694	5.33078	5.30245	5.93853	5.41233	6.45079	5.75457	6.62175	6.4089	7.47805	3.87353	4.3546	4.95347	5.74886	9.57813	10.1385	8.76015	9.51708	7.94535	8.80276	2.41511	2.85447	3.3002	3.82044	5.31938	6.0431	6.70942	7.46488	8.02733	8.72884	7.86217	8.43264	4.07922	5.1564	4.74884	5.52203	5.46792	7.31834	6.50883	8.27491	8.34616	8.91892	8.10803	8.84236	9.03313	9.78784	9.75036
2006-03-23	8.24696	8.71927	4.93127	5.38881	5.51639	5.95414	5.97991	6.50337	6.19678	6.66008	6.92651	7.52003	4.27643	4.42899	5.73575	5.85828	10.1967	10.2034	9.39044	9.63168	8.56223	8.94867	2.73717	2.93529	3.60458	3.92677	5.76673	6.18348	7.26796	7.59511	8.54597	8.84518	8.12982	8.55527	4.71107	5.12557	5.33406	5.68095	6.2754	7.16798	7.29136	8.11928	8.52639	8.94265	8.17429	8.81555	9.31177	9.83208	10.1211
2006-03-24	9.11221	9.0056	5.80282	5.6852	6.20094	6.13754	6.90629	6.79805	6.98661	6.9006	7.91138	7.81009	4.71583	4.65398	6.35391	6.2791	10.5363	10.5026	10.0628	9.96675	9.44853	9.31334	3.23667	3.16393	4.27854	4.17306	6.64684	6.50918	8.06022	7.94219	9.24776	9.14146	8.91653	8.78649	5.47136	5.21796	6.21122	5.81559	7.20019	7.25729	8.16414	8.20383	8.95755	9.15314	8.71967	9.04175	9.87756	10.1154	10.3551
2006-03-25	9.88171	8.82837	6.67225	5.49098	6.76475	6.10065	7.71489	6.63676	7.65114	6.78819	8.71407	7.69283	5.16	4.56621	7.18124	6.01469	11.0777	10.2656	10.6894	9.84506	10.1607	9.2568	3.74994	3.10052	4.83983	4.1716	7.35315	6.50194	8.76716	7.863	9.81526	9.08657	9.42781	8.86099	6.12848	4.88581	6.9679	5.4787	7.91018	6.84002	8.82247	7.80617	9.45857	9.10694	9.37953	9.12063	10.519	10.0247	11.2437
2006-03-26	10.1871	8.19953	6.95055	4.90414	7.06083	5.70007	8.05749	5.99016	7.95986	6.24957	9.11493	7.03054	5.35907	4.16342	7.39451	5.36703	11.1606	9.83	11.0073	9.21722	10.6218	8.5186	3.98107	2.70731	5.19387	3.68944	7.82004	5.84631	9.1598	7.2067	10.1779	8.48823	9.88447	8.3254	6.21142	4.53971	6.92812	4.86952	7.8855	6.44505	8.77927	7.42738	9.7344	8.76139	9.8561	8.7301	10.8455	9.55978	11.5763
2006-03-27	9.00026	7.80594	5.66372	4.53761	6.35998	5.38777	6.85479	5.56863	7.00078	5.88456	7.9816	6.56921	4.63166	4.10167	6.00246	5.35524	10.1804	9.88601	9.94714	9.12524	9.4796	8.32642	3.21875	2.5951	4.39318	3.49267	6.77844	5.60392	8.04871	7.03984	9.2524	8.34559	9.16942	8.06313	4.83039	4.53833	6.01215	4.82239	6.24584	6.33935	7.2171	7.3363	9.07241	8.65176	9.33325	8.44196	9.9198	9.45103	10.9605
2006-03-28	8.06942	7.9942	4.77339	4.68871	5.56059	5.42846	5.84069	5.74004	6.11424	6.0144	6.8548	6.71824	4.18276	4.24972	5.45928	5.58026	9.93792	10.0277	9.25112	9.3553	8.4984	8.60966	2.68784	2.74765	3.62384	3.68865	5.77591	5.8665	7.19061	7.29119	8.48142	8.57316	8.22249	8.28732	4.10639	4.4938	4.94129	4.80158	5.40327	6.23648	6.42064	7.23969	8.63953	8.52774	8.48386	8.35447	9.42102	9.2701	10.3393
2006-03-29	8.19177	8.5567	4.87558	5.23232	5.56989	5.79624	5.94751	6.32121	6.19021	6.49718	6.937	7.30988	4.20688	4.55006	5.49793	6.11995	9.96382	10.4079	9.28872	9.80969	8.54275	9.11484	2.71148	3.04752	3.65294	4.02386	5.81542	6.31472	7.23004	7.76136	8.51734	8.98364	8.25488	8.62008	4.48838	4.84823	5.13038	5.29086	5.85556	6.65705	6.85595	7.64401	8.7663	8.68487	8.52598	8.39382	9.61627	9.51609	10.4229
2006-03-30	8.37209	9.13941	5.04985	5.83151	5.73041	6.22122	6.14554	6.93505	6.36418	7.01065	7.15878	7.94087	4.34216	4.97847	5.74359	6.83959	10.1442	10.8595	9.49739	10.4397	8.76719	9.87583	2.83625	3.53193	3.78859	4.60392	6.00247	7.06125	7.43513	8.47849	8.70172	9.58964	8.38925	9.21938	4.87053	5.49471	5.35112	5.88402	6.35147	7.38896	7.34794	8.33515	9.02661	9.11184	8.87475	8.92564	9.95238	10.0757	10.856
2006-03-31	8.01803	9.73624	4.74213	6.48768	5.58076	6.66699	5.80269	7.56525	6.09116	7.53334	6.83343	8.57741	4.21153	5.32051	5.45049	7.39334	9.89252	11.1822	9.29377	10.9337	8.60049	10.4947	2.75494	3.90096	3.74177	5.0636	5.92201	7.64664	7.29201	9.01713	8.55617	10.0781	8.37218	9.73972	4.42946	6.2496	5.25578	6.74	5.76316	8.27419	6.74829	9.15796	8.76532	9.6273	8.76364	9.60194	9.55807	10.7322	10.6318
2006-04-01	8.26854	9.81439	4.94943	6.52227	5.56422	6.78556	6.01148	7.66559	6.23098	7.63841	6.97577	8.72752	4.33468	5.2896	5.77126	7.24612	10.1859	11.0598	9.4837	10.9164	8.71938	10.5289	2.82312	3.8739	3.74893	5.08091	5.95344	7.681	7.4115	9.02017	8.66706	10.1039	8.3104	9.82966	5.93945	7.43289	6.07439	7.95498	7.80367	9.48733	9.08925	10.6734	8.90191	9.85748	8.64942	10.0437	9.80495	10.9954	10.6292
2006-04-02	9.08459	9.27864	5.77957	5.93916	6.16809	6.42616	6.87363	7.11052	6.95561	7.18635	7.86974	8.18441	4.81773	4.99383	6.58059	6.72738	10.7049	10.7292	10.2037	10.4892	9.58165	10.0241	3.34532	3.55824	4.37374	4.72276	6.76639	7.2257	8.20291	8.57165	9.35657	9.70209	8.97533	9.444	6.81256	6.71239	6.97884	7.31088	8.81178	8.66055	10.0351	9.90593	9.56956	9.72492	9.45467	9.96075	10.6731	10.8107	11.1201
2006-04-03	9.00046	8.56754	5.65996	5.24217	6.22565	5.94267	6.818	6.37073	6.94104	6.56941	7.88212	7.42659	4.7689	4.56654	6.34155	5.99726	10.476	10.243	10.1542	9.84619	9.62994	9.27289	3.31463	3.10764	4.43596	4.19181	6.85173	6.52652	8.20245	7.87472	9.38603	9.09763	9.1495	8.89337	6.78262	6.00507	7.1892	6.48042	8.78001	7.83182	10.0121	9.12073	9.60625	9.32702	9.82097	9.49884	10.6566	10.2891	11.11
2006-04-04	8.61608	8.22637	5.28504	4.91367	5.9193	5.64318	6.40571	5.99722	6.58693	6.24192	7.43779	7.00961	4.47085	4.35608	5.88271	5.72907	10.1928	10.1116	9.69769	9.52001	9.0627	8.82463	2.99423	2.86465	4.02677	3.84713	6.31146	6.07562	7.69117	7.4813	8.93254	8.74407	8.68961	8.47445	6.07641	5.9611	6.4983	6.22452	7.95435	7.78215	9.2326	9.07467	9.1856	9.14309	9.3112	9.12466	10.1067	10.0812	10.8229
2006-04-05	8.2973	8.17292	4.98567	4.86387	5.72935	5.6067	6.08148	5.94159	6.32013	6.19503	7.11276	6.95146	4.18474	4.36551	5.41344	5.75335	9.87145	10.1333	9.25193	9.5343	8.54615	8.83411	2.71848	2.87065	3.69445	3.84871	5.85803	6.07909	7.23064	7.49114	8.51284	8.7527	8.32544	8.47111	5.67888	5.9367	6.13766	6.19546	7.48659	7.75297	8.78806	9.04646	8.8391	9.00344	8.79205	8.97877	9.671	9.8918	10.6587
2006-04-06	8.35146	8.37542	5.02864	5.05186	5.67658	5.69372	6.11314	6.1383	6.32852	6.34973	7.10721	7.13348	4.20057	4.55179	5.5218	6.09995	10.0025	10.3831	9.27905	9.81492	8.50135	9.13748	2.68915	3.05408	3.60331	4.04617	5.75539	6.34365	7.19661	7.77649	8.48814	9.00018	8.18185	8.65878	5.89014	6.06941	6.28135	6.35756	7.73862	7.90899	9.02908	9.19483	8.81877	9.05694	8.64319	8.94407	9.67329	9.98498	10.6519
2006-04-07	8.56632	9.09147	5.23711	5.79641	5.85631	6.1554	6.34593	6.87584	6.53047	6.95191	7.36242	7.85977	4.54434	4.89605	6.10737	6.69114	10.3982	10.7642	9.8015	10.3223	9.10719	9.73895	3.0419	3.43644	4.01901	4.4961	6.30837	6.92497	7.75346	8.34464	8.97732	9.48075	8.617	9.11675	6.02515	6.5418	6.2252	7.01366	7.8987	8.45889	9.1804	9.71169	9.07434	9.52552	8.91872	9.442	10.0182	10.6088	10.8965
2006-04-08	8.40007	9.35626	5.08014	6.03343	5.78991	6.43984	6.1858	7.18033	6.4062	7.23279	7.2179	8.23005	4.43892	4.97589	5.79849	6.73686	10.1159	10.7536	9.64877	10.4561	9.0325	9.95795	2.97605	3.53375	4.0255	4.66847	6.3041	7.15345	7.65985	8.52183	8.90435	9.6513	8.70617	9.35945	5.83791	6.93664	6.1056	7.49743	7.6806	8.91549	8.97217	10.1395	9.08182	9.71456	9.07135	9.87946	9.99583	10.8109	11.0166
2006-04-09	8.54539	9.24141	5.21963	5.91807	5.79904	6.34369	6.31233	7.05593	6.49238	7.12551	7.30641	8.0952	4.42671	4.99721	5.89264	6.81295	10.2482	10.8188	9.62584	10.4797	8.91192	9.96056	2.92091	3.55522	3.88507	4.66873	6.13158	7.15045	7.56892	8.53787	8.81916	9.65503	8.48722	9.33005	5.88854	6.70806	6.26376	7.25965	7.7398	8.65446	9.02962	9.89886	9.16448	9.55711	9.08126	9.73329	10.1246	10.5988	11.2111
2006-04-10	8.81832	9.54226	5.4873	6.267	6.02883	6.52312	6.60844	7.36099	6.74908	7.36532	7.63054	8.37437	4.59459	5.1724	6.13723	7.12933	10.3892	11.0204	9.88288	10.7277	9.2434	10.2499	3.10777	3.76025	4.13234	4.89953	6.45578	7.44093	7.8661	8.82229	9.08256	9.88488	8.77215	9.54807	6.28224	6.72889	6.53147	7.4632	8.20254	8.67617	9.46617	9.91641	9.45438	9.66709	9.42745	9.73528	10.5029	10.7668	11.4387
2006-04-11	8.63267	10.0559	5.30133	6.84178	5.94982	6.92523	6.42826	7.90761	6.61	7.8214	7.46997	8.93186	4.518	5.54377	5.96555	7.80652	10.2511	11.4306	9.76983	11.2299	9.14354	10.8413	3.0404	4.22278	4.07935	5.411	6.38243	8.06764	7.76533	9.42239	8.99832	10.3498	8.7434	10.0085	6.27946	7.29377	6.49057	8.12073	8.20289	9.3215	9.46742	10.514	9.24588	9.83322	9.38666	10.0021	10.1856	10.9668	11.143
2006-04-12	8.61314	10.4415	5.28428	7.27669	5.87129	7.24314	6.39001	8.32178	6.56328	8.17021	7.39908	9.36105	4.50802	5.68239	5.99775	7.94423	10.3005	11.4814	9.75154	11.4578	9.08386	11.1754	3.0148	4.37915	4.01735	5.66047	6.30448	8.40069	7.72029	9.70137	8.9548	10.6131	8.64707	10.3415	6.16621	7.8588	6.43381	8.32154	8.06373	9.97989	9.33672	11.1219	9.21413	10.3286	9.15394	10.5086	10.1868	11.6033	10.3196
2006-04-13	8.78886	10.3083	5.45798	7.06656	6.00625	7.17418	6.57708	8.19218	6.72245	8.07951	7.5974	9.26864	4.6136	5.54053	6.17038	7.68103	10.4115	11.3226	9.91138	11.2693	9.27629	10.9554	3.12781	4.19965	4.15557	5.46541	6.48632	8.16397	7.89684	9.47438	9.10905	10.4406	8.79578	10.1716	6.20261	7.78449	6.45943	8.10276	8.07818	9.93161	9.35377	11.0811	9.26444	10.2213	9.27434	10.6928	10.2397	11.4193	10.3721
2006-04-14	8.43635	10.4283	5.11967	7.27494	5.85359	7.22504	6.23431	8.30503	6.45457	8.15248	7.28431	9.33539	4.39751	5.58481	5.73474	7.82566	10.0751	11.4274	9.58443	11.306	8.95398	10.9624	2.93374	4.26491	3.97165	5.49494	6.2318	8.18439	7.59008	9.51548	8.84117	10.4455	8.64497	10.1374	5.93822	7.73183	6.32208	7.8869	7.767	9.9421	9.05809	11.0725	8.99858	10.2752	9.03518	10.549	9.87093	11.5214	10.082
2006-04-15	8.24129	9.90488	4.92446	6.57938	5.62616	6.91713	6.00525	7.77959	6.2433	7.75427	7.00666	8.88992	4.27565	5.21734	5.61685	7.0357	10.0486	10.8924	9.39548	10.8302	8.66179	10.4798	2.77599	3.81678	3.72685	5.07484	5.91698	7.68363	7.33731	8.97913	8.61465	10.062	8.3323	9.85674	5.79296	7.06666	6.04297	7.26943	7.59756	9.18247	8.89754	10.3781	9.0048	10.0749	8.86556	10.4853	9.9198	11.2392	9.89625
2006-04-16	8.61664	8.90905	5.29096	5.56894	5.84792	6.18723	6.38657	6.72942	6.55412	6.87268	7.38203	7.8032	4.52572	4.64782	6.06904	6.13105	10.3697	10.3321	9.77437	9.97088	9.07998	9.42003	3.02326	3.19062	4.00113	4.29236	6.28489	6.66092	7.7264	8.00817	8.95501	9.21634	8.60296	9.0021	6.11187	6.01784	6.27122	6.18104	7.97226	7.95459	9.25321	9.21989	9.29071	9.32359	9.20913	9.62381	10.2948	10.2556	10.8159
2006-04-17	8.93011	8.63953	5.60187	5.30967	6.10202	5.89762	6.72393	6.41977	6.8439	6.59003	7.74545	7.43372	4.70715	4.50342	6.31843	5.98474	10.503	10.2889	10.0527	9.74497	9.45094	9.08017	3.23075	3.01151	4.28459	4.0168	6.65498	6.30337	8.05668	7.71579	9.24837	8.95137	8.93712	8.64984	6.38117	5.91625	6.58765	5.99919	8.28607	7.83593	9.54966	9.1095	9.27351	9.0708	9.33855	8.99741	10.24	9.995	10.1532
2006-04-18	9.16125	9.0342	5.84482	5.72066	6.25865	6.14365	6.96408	6.82404	7.04124	6.91805	7.98454	7.82741	4.82698	4.79386	6.53529	6.52868	10.6491	10.6673	10.2284	10.171	9.65106	9.54961	3.36099	3.31888	4.4309	4.34954	6.84431	6.73635	8.24842	8.16863	9.40913	9.33061	9.07866	8.95912	6.29203	6.45626	6.56141	6.63079	8.18269	8.46244	9.45277	9.69914	9.23808	9.39631	9.2277	9.31392	10.2084	10.4366	10.7851
2006-04-19	8.96369	9.05544	5.62454	5.71909	6.18973	6.23703	6.77675	6.86804	6.90411	6.97609	7.83444	7.91891	4.66759	4.76952	6.18109	6.35638	10.3752	10.4931	9.99997	10.1538	9.44087	9.61928	3.20564	3.31197	4.29947	4.42405	6.67196	6.83657	8.03052	8.19587	9.23475	9.37855	8.99913	9.12795	6.06012	6.36819	6.3506	6.46168	7.91138	8.35409	9.19574	9.60203	9.08839	9.4474	9.10801	9.55901	9.99797	10.4649	10.4275
2006-04-20	8.53261	8.53693	5.20547	5.21238	5.87991	5.9133	6.32365	6.33652	6.52195	6.53895	7.361	7.38743	4.35329	4.44489	5.68595	5.82562	10.0576	10.1454	9.51592	9.65796	8.8532	9.0282	2.87916	2.97411	3.88998	4.01178	6.12611	6.28894	7.50233	7.65803	8.7625	8.903	8.54269	8.68156	5.63881	5.86757	5.80978	6.09199	7.4457	7.77299	8.74632	9.04938	8.81747	9.0513	8.76415	9.14485	9.64263	9.9301	9.81032
2006-04-21	8.68641	8.35562	5.3615	5.03331	5.89573	5.70486	6.45925	6.12446	6.61444	6.3435	7.45577	7.13058	4.51257	4.27242	6.06392	5.58849	10.3751	10.0144	9.75273	9.3905	9.04203	8.67609	3.00552	2.78339	3.96917	3.75098	6.24331	5.945	7.6955	7.34751	8.9258	8.62336	8.55813	8.37142	6.04628	5.31493	6.1424	5.57079	7.93011	7.11477	9.2083	8.41689	8.98913	8.69861	8.7837	8.60276	9.91332	9.48842	9.98103
2006-04-22	9.16496	8.31635	5.85432	4.99956	6.24891	5.71676	6.9645	6.09424	7.03788	6.32598	7.97681	7.11583	4.95971	4.19856	6.80924	5.46977	10.8414	9.93461	10.4123	9.27537	9.84167	8.5406	3.50998	2.71116	4.57695	3.66233	7.02682	5.82451	8.44636	7.22701	9.5626	8.51357	9.19098	8.2729	6.58829	5.28955	6.71091	5.3998	8.56544	7.09306	9.80598	8.40193	9.57152	8.69741	9.48665	8.47365	10.6699	9.51745	10.208
2006-04-23	9.66466	8.50478	6.40248	5.17893	6.61692	5.77493	7.49083	6.27104	7.47341	6.45888	8.50633	7.26614	5.31114	4.32323	7.37933	5.72134	11.1746	10.1348	10.9199	9.46797	10.4768	8.72524	3.92843	2.81368	5.08845	3.75551	7.67552	5.95939	9.04827	7.39857	10.064	8.6688	9.7238	8.34822	7.08451	5.67585	7.41948	5.72443	9.10031	7.53728	10.3087	8.82944	10.0763	8.90156	10.2394	8.71355	11.2843	9.78978	10.5183
2006-04-24	9.80309	9.16157	6.51803	5.86478	6.76649	6.21945	7.65055	6.95328	7.62221	7.02018	8.70405	7.94697	5.39666	4.68591	7.46185	6.34697	11.2019	10.5528	11.0594	10.012	10.6836	9.35796	4.02672	3.1973	5.2454	4.20411	7.88403	6.54893	9.22122	7.98815	10.2266	9.1779	9.93267	8.80885	7.18321	6.57208	7.57803	6.70625	9.21649	8.53064	10.4207	9.77193	10.015	9.44718	10.365	9.3124	11.1718	10.515	10.3781
2006-04-25	9.79055	9.31309	6.51523	5.98561	6.74363	6.41508	7.63334	7.13676	7.60311	7.1984	8.67592	8.18981	5.37181	4.7979	7.42635	6.44222	11.1832	10.5684	11.0224	10.1918	10.6344	9.63728	3.99717	3.335	5.20619	4.42755	7.83365	6.84147	9.17637	8.22251	10.1878	9.39563	9.88813	9.10604	6.95678	6.68954	7.30559	6.90657	8.95635	8.67336	10.1795	9.91153	9.83201	9.53248	10.0764	9.69067	10.9509	10.5695	10.2682
2006-04-26	9.69266	9.4346	6.39326	6.1422	6.68845	6.4513	7.53523	7.24981	7.52811	7.27609	8.59101	8.2687	5.20291	4.97096	7.09208	6.81212	10.9626	10.8366	10.7931	10.4322	10.3835	9.87583	3.79557	3.52336	4.99842	4.60315	7.57838	7.06209	8.91568	8.47295	9.98846	9.58922	9.71817	9.23008	6.72943	6.83427	7.0917	7.00846	8.69303	8.83807	9.93276	10.0624	9.78479	9.81766	9.97399	9.86719	10.8991	10.9683	10.2558
2006-04-27	10.2656	10.0768	7.13537	6.88901	7.06569	6.92609	8.1216	7.92474	7.98559	7.82848	9.11698	8.93295	5.54518	5.38289	7.85677	7.53008	11.471	11.2719	11.2114	11.0104	10.7932	10.5719	4.23522	4.02025	5.39181	5.17693	8.03043	7.77945	9.40108	9.15488	10.3109	10.1387	9.9431	9.78509	7.38984	7.42211	7.72702	7.67372	9.44188	9.50601	10.6211	10.6805	10.2171	10.2226	10.3687	10.4567	11.4663	11.4605	10.6327
2006-04-28	10.9104	10.5544	7.84012	7.4056	7.62978	7.33739	8.82293	8.44318	8.5873	8.2725	9.8682	9.48688	6.03255	5.65547	8.6057	7.93993	11.8586	11.4905	11.8903	11.4047	11.6782	11.0876	4.85197	4.35305	6.15597	5.60151	8.98179	8.31715	10.2471	9.6363	11.0019	10.5436	10.7365	10.2454	7.93235	7.99949	8.26438	8.25505	10.0631	10.1629	11.2007	11.2869	10.6105	10.2951	10.9981	10.6753	11.9279	11.5299	10.8527
2006-04-29	11.1661	11.1561	8.13825	8.19122	7.85104	7.8268	9.09915	9.07988	8.82107	8.79181	10.1564	10.1058	6.2487	6.01769	8.93387	8.60743	12.0226	11.8639	12.1866	11.8553	12.0674	11.6211	5.12986	4.8419	6.49935	6.12369	9.40668	8.93256	10.621	10.2075	11.3048	10.956	11.09	10.6758	8.48024	8.68485	8.80741	8.88638	10.6694	10.9154	11.7542	11.9756	10.8753	10.7098	11.3601	11.0302	12.2432	12.0596	11.0282
2006-04-30	11.2039	11.594	8.15772	8.669	7.89075	8.22211	9.14328	9.55857	8.86362	9.20565	10.2146	10.6252	6.20965	6.2959	8.81962	9.01226	11.9562	12.0622	12.167	12.2461	12.0668	12.1425	5.05845	5.19394	6.45659	6.57232	9.37534	9.49376	10.5853	10.6982	11.3078	11.3627	11.1091	11.1562	8.46189	9.01004	8.80768	9.36235	10.6632	11.2623	11.7583	12.3024	10.9852	11.1072	11.5685	11.6563	12.3662	12.5178	11.068
2006-05-01	10.9186	11.9157	7.77881	9.10177	7.66461	8.50624	8.84307	9.90175	8.62119	9.4896	9.92824	10.9666	6.05736	6.54138	8.56426	9.43621	11.8209	12.2708	11.9682	12.5314	11.8173	12.4953	4.85732	5.54318	6.22508	6.94945	9.09552	9.92986	10.3333	11.0816	11.1143	11.631	10.8932	11.4644	8.11362	9.15312	8.54539	9.62431	10.2732	11.4174	11.4007	12.444	10.7403	11.1961	11.3652	11.8624	12.0577	12.6131	10.8562
2006-05-02	10.9428	11.93	7.87701	9.04363	7.65797	8.5262	8.85807	9.92533	8.6172	9.52183	9.90525	11.0208	6.19893	6.61478	8.88073	9.49954	11.9996	12.2982	12.1041	12.6684	11.9488	12.6967	5.07482	5.61443	6.41254	7.08135	9.29025	10.1154	10.5217	11.2405	11.211	11.7918	10.9744	11.6625	8.40705	9.21221	8.77751	9.5402	10.5853	11.5061	11.6784	12.5234	10.9263	11.2321	11.3742	11.8932	12.3096	12.6569	11.0782
2006-05-03	11.4032	11.8553	8.47032	8.98039	8.048	8.45602	9.34893	9.84153	9.02263	9.44619	10.3935	10.9222	6.52016	6.62141	9.40403	9.52837	12.2557	12.3128	12.5039	12.661	12.459	12.6788	5.51482	5.6336	6.91536	7.0865	9.88849	10.1118	11.0458	11.2381	11.603	11.7758	11.431	11.641	8.92584	9.11214	9.31673	9.51598	11.1596	11.3968	12.2047	12.4266	11.1456	11.2836	11.7584	11.962	12.5577	12.7168	11.2018
2006-05-04	12.1936	12.0581	9.52613	9.27252	8.75963	8.63596	10.1939	10.056	9.72655	9.62121	11.2443	11.1294	7.01057	6.73327	10.2024	9.72028	12.6088	12.4026	13.0377	12.7835	13.1378	12.8305	6.23272	5.79757	7.69194	7.26017	10.7749	10.3091	11.794	11.4082	12.1123	11.8899	12.054	11.7758	9.48082	9.07792	9.95501	9.64462	11.7629	11.3558	12.7545	12.3871	11.4764	11.2869	12.1026	11.9868	12.9486	12.7188	11.4265
2006-05-05	12.6362	11.8156	9.99377	8.85868	9.17007	8.43136	10.6804	9.80709	10.1521	9.42997	11.7833	10.9173	7.23762	6.54042	10.4813	9.3271	12.7369	12.2093	13.3899	12.6152	13.6305	12.6532	6.49908	5.48724	8.07572	6.98083	11.2758	10.0209	12.2251	11.1534	12.4999	11.7636	12.525	11.6405	9.62423	9.06758	10.1726	9.39803	11.933	11.3548	12.9167	12.3851	11.6099	11.3163	12.4048	12.0051	13.0922	12.7548	11.4767
2006-05-06	12.7069	11.4886	10.0752	8.50013	9.23598	8.13716	10.7574	9.4499	10.2187	9.12167	11.8666	10.5309	7.17296	6.31577	10.3723	9.00246	12.693	12.0515	13.3335	12.2996	13.5613	12.2309	6.39642	5.2029	7.9739	6.61739	11.1667	9.56605	12.1369	10.7566	12.4504	11.4342	12.4604	11.2502	9.93168	8.74615	10.4068	9.11713	12.2516	11.0211	13.2018	12.0824	11.7901	11.106	12.5606	11.839	13.3016	12.4967	11.6254
2006-05-07	12.9652	11.6018	10.4595	8.68933	9.48507	8.22743	11.0304	9.56579	10.4454	9.20983	12.1377	10.6281	7.19442	6.31485	10.4267	9.031	12.7122	12.0701	13.3252	12.2786	13.5404	12.1897	6.44701	5.2142	8.00307	6.60583	11.1822	9.53932	12.1449	10.7369	12.4293	11.4001	12.4389	11.2025	10.1106	8.80653	10.5621	9.17756	12.4643	11.0731	13.3985	12.123	12.0532	11.0131	12.8977	11.6154	13.5954	12.3982	12.0511
2006-05-08	13.0773	11.7234	10.5419	8.81232	9.58614	8.33918	11.1572	9.69995	10.5603	9.32765	12.2885	10.778	7.33157	6.37625	10.6363	9.12997	12.7964	12.1194	13.4672	12.3575	13.7259	12.2909	6.65008	5.29666	8.22441	6.7019	11.4336	9.65499	12.3499	10.8388	12.5671	11.4782	12.616	11.2929	10.006	8.77931	10.35	9.23805	12.3844	11.0745	13.3248	12.1239	12.0126	11.216	12.9842	11.8018	13.5448	12.6447	12.6661
2006-05-09	13.0567	11.768	10.5277	8.87359	9.56758	8.37796	11.1338	9.7473	10.539	9.36648	12.2603	10.8243	7.59716	6.38612	11.0287	9.13427	12.9422	12.1201	13.7206	12.3783	14.0599	12.323	7.05101	5.30472	8.6547	6.72112	11.9149	9.68334	12.7305	10.8625	12.8114	11.504	12.9437	11.3257	10.3042	8.75201	10.5975	9.08552	12.7131	11.0418	13.6109	12.0927	11.9829	11.2374	12.8781	11.9453	13.5146	12.6587	12.9269
2006-05-10	13.5363	11.5422	11.2584	8.5389	10.0523	8.1897	11.6376	9.51095	10.9621	9.1782	12.7686	10.606	7.84172	6.39222	11.3554	9.1507	13.0673	12.1291	14.0003	12.3814	14.4435	12.324	7.39006	5.31591	9.05833	6.72855	12.3941	9.68929	13.1171	10.8685	13.1015	11.5042	13.3204	11.3243	10.9962	8.53824	11.2478	8.83929	13.414	10.804	14.2513	11.8795	12.3322	10.9729	13.1796	11.6654	13.9022	12.3382	13.2158
2006-05-11	12.908	11.8487	10.128	9.06004	9.42077	8.44284	10.9943	9.82512	10.4467	9.41834	12.1812	10.8713	7.14533	6.55813	10.1819	9.45576	12.6138	12.2797	13.4646	12.5583	13.7993	12.5333	6.25401	5.56225	7.96909	6.97806	11.2584	9.9677	12.2253	11.1142	12.6565	11.6609	12.71	11.5009	10.0694	8.74502	10.4007	9.01809	12.55	11.0189	13.4799	12.0687	12.1087	10.9914	13.2243	11.5372	13.6472	12.378	12.9973
2006-05-12	11.5708	12.3749	8.49652	9.68749	8.23521	8.92704	9.55212	10.3961	9.22884	9.90725	10.6861	11.478	6.32894	6.87133	8.95185	9.96247	12.0135	12.5101	12.3602	12.9173	12.3429	12.9924	5.19339	6.01045	6.66344	7.47417	9.65015	10.543	10.8197	11.6053	11.5257	12.0086	11.3776	11.9202	8.71002	9.04208	9.05173	9.36131	11.0663	11.3505	12.1177	12.3733	11.4948	11.2005	12.4475	11.8009	12.9435	12.6249	12.6148
2006-05-13	11.2029	12.7513	8.17844	10.1778	7.88376	9.28058	9.13921	10.8008	8.85558	10.2502	10.1996	11.8982	6.08957	7.1619	8.63641	10.394	11.863	12.6954	12.0009	13.2632	11.8493	13.4514	4.90535	6.41581	6.26692	7.94626	9.13983	11.1019	10.377	12.0741	11.1382	12.358	10.9127	12.3536	8.52286	9.63637	8.73752	9.91007	10.8463	11.9882	11.8966	12.9487	11.1915	11.6458	11.9005	12.2863	12.6032	13.1435	11.357
2006-05-14	11.7698	12.7617	8.96712	10.111	8.37078	9.28592	9.73934	10.8198	9.34489	10.2759	10.78	11.9426	6.34761	7.09481	9.14397	10.2335	12.1321	12.6351	12.2763	13.2681	12.1585	13.4843	5.28666	6.26999	6.63807	7.85279	9.54999	11.0395	10.7523	12.033	11.3705	12.3961	11.1543	12.3908	9.20974	9.82857	9.48201	10.1385	11.5849	12.2108	12.5654	13.1616	11.4215	11.8678	12.038	12.7176	12.8851	13.3861	11.6337
2006-05-15	12.2874	12.6884	9.56722	10.0501	8.84602	9.21859	10.3027	10.7377	9.82927	10.2021	11.3838	11.8464	6.81584	7.06827	9.89263	10.2382	12.4782	12.6323	12.8334	13.1788	12.8755	13.3468	5.94405	6.26886	7.38083	7.79836	10.4224	10.9418	11.5016	11.9442	11.9169	12.2825	11.8087	12.2557	9.44058	9.73927	9.7589	10.011	11.9077	12.1122	12.8532	13.0736	11.6742	11.7981	12.4329	12.6926	13.1693	13.3038	12.6491
2006-05-16	12.188	13.224	9.35612	10.8608	8.75874	9.74535	10.2044	11.3019	9.75875	10.672	11.3129	12.4083	6.80282	7.44975	9.76635	10.8364	12.423	12.8617	12.9288	13.5252	13.0479	13.79	5.85514	6.85994	7.38874	8.40905	10.4984	11.6108	11.5712	12.4766	12.0648	12.603	11.9908	12.6831	9.16949	10.3536	9.43842	10.592	11.6369	12.7327	12.6063	13.6283	11.4478	11.9992	12.3171	12.8008	12.8951	13.5365	12.5748
2006-05-17	11.8668	14.2654	8.9577	12.2542	8.47089	10.8066	9.85806	12.4087	9.46643	11.6324	10.9545	13.5995	6.50282	8.21801	9.28316	11.8363	12.1895	13.181	12.5554	14.1986	12.5686	14.7159	5.44414	8.00348	6.91657	9.65898	9.93606	13.013	11.0806	13.5259	11.6968	13.2703	11.559	13.6419	8.80652	11.6865	9.10708	12.0164	11.2115	14.1093	12.2266	14.8751	11.4143	12.7213	12.1083	13.5287	12.8706	14.3141	12.6231
2006-05-18	12.0345	15.0001	9.26068	13.094	8.61363	11.5353	10.0288	13.2016	9.59548	12.3345	11.0946	14.4906	6.65311	8.64226	9.63043	12.3488	12.3612	13.3956	12.6505	14.7828	12.6413	15.5357	5.70908	8.52864	7.12234	10.3686	10.1242	13.9109	11.2489	14.2717	11.7402	13.9065	11.5936	14.4401	8.97406	12.4412	9.28173	12.7498	11.3675	14.9282	12.3645	15.6377	11.612	13.3382	12.34	14.4064	13.0993	14.9523	12.6227
2006-05-19	12.9457	14.7601	10.5416	12.6391	9.48001	11.2337	10.9987	12.9699	10.4079	12.131	12.0763	14.2458	7.30396	8.41368	10.6481	12.0811	12.7809	13.3517	13.324	14.7068	13.5113	15.4254	6.67515	8.14761	8.16537	10.0088	11.3051	13.5533	12.2191	14.061	12.3866	13.8526	12.415	14.2839	10.1388	11.909	10.4353	12.3727	12.5804	14.4514	13.4604	15.214	12.115	13.2529	12.8615	14.6072	13.6664	14.8808	12.8196
2006-05-20	13.7054	14.7838	11.4365	12.8394	10.2118	11.3168	11.8234	12.9699	11.1255	12.1288	12.9763	14.2296	7.75918	8.46253	11.2466	12.1345	13.0256	13.3119	13.9047	14.5562	14.3119	15.2169	7.27662	8.29856	8.9219	10.0701	12.2313	13.5412	12.9858	13.9727	13.0018	13.6618	13.191	14.125	10.9139	11.9807	11.3143	12.3913	13.4105	14.4434	14.2337	15.1951	12.6211	13.2383	13.5527	14.4069	14.2118	14.8578	12.2324
2006-05-21	13.4504	15.0651	10.9385	13.1306	9.93478	11.5844	11.5671	13.2783	10.9193	12.4019	12.7433	14.5782	7.53681	8.61936	10.8752	12.3256	12.9107	13.3959	13.8095	14.7861	14.209	15.5389	6.87667	8.48756	8.57466	10.3339	11.9033	13.8803	12.7583	14.2597	12.95	13.9136	13.0775	14.4354	10.4925	12.427	10.9213	12.8926	12.995	14.8862	13.874	15.6058	12.3466	13.4618	13.5504	14.6368	13.9113	15.0818	12.0241
2006-05-22	13.4972	15.0163	11.179	13.0444	10.0078	11.5239	11.5989	13.2307	10.9307	12.3594	12.7332	14.5262	7.51759	8.55478	10.9144	12.2531	12.9009	13.3844	13.6449	14.7621	13.959	15.5033	6.93154	8.38247	8.52528	10.2322	11.7696	13.7772	12.6166	14.1985	12.7376	13.8946	12.8436	14.3867	10.5765	12.1942	10.9359	12.6311	13.0328	14.7094	13.8969	15.4487	12.24	13.3829	13.1798	14.7222	13.8001	15.0125	11.9107
2006-05-23	13.836	15.1656	11.5673	13.292	10.3335	11.7049	11.9676	13.3779	11.2528	12.4916	13.1388	14.6901	7.65434	8.74771	11.09	12.4527	12.9768	13.4021	13.8359	14.8011	14.224	15.5682	7.10357	8.70142	8.75414	10.5307	12.0578	14.0701	12.8599	14.353	12.9436	13.9152	13.0984	14.502	10.7916	12.2146	11.1127	12.5274	13.2844	14.7085	14.1252	15.4369	12.4452	13.4831	13.4021	14.658	14.0238	15.1029	12.0278
2006-05-24	13.8911	15.1127	11.6107	13.1366	10.3823	11.6126	12.0297	13.3377	11.3084	12.454	13.2111	14.6475	7.71828	8.71489	11.1812	12.4453	13.0094	13.4577	13.8963	14.9576	14.3046	15.7781	7.19963	8.59082	8.85818	10.4977	12.1746	14.103	12.951	14.46	13.0025	14.1046	13.1786	14.6595	10.6309	12.0447	10.8253	12.4116	13.1133	14.6397	13.9792	15.3554	12.4139	13.5192	13.4912	14.8262	13.9886	15.1472	11.9529
2006-05-25	14.2799	14.3789	12.2093	12.1132	10.8005	10.84	12.4331	12.5668	11.6551	11.7817	13.6333	13.8139	8.03889	8.16353	11.6204	11.7477	13.1425	13.251	14.1347	14.5122	14.6252	15.1605	7.70378	7.76109	9.37613	9.60347	12.7317	13.1115	13.3567	13.7382	13.2241	13.667	13.5175	14.0042	11.1939	11.4187	11.3401	11.8634	13.6497	13.9743	14.4568	14.7674	12.7508	13.0516	13.6747	14.4584	14.348	14.6733	12.1931
2006-05-26	14.6637	13.857	12.6363	11.5449	11.1736	10.3439	12.8504	11.9955	12.0233	11.2804	14.1003	13.179	8.27339	7.86045	11.9104	11.3692	13.2618	13.0838	14.4489	14.0687	15.0641	14.5419	8.00095	7.3918	9.76804	9.09373	13.2219	12.4588	13.7626	13.1835	13.5636	13.1835	13.9451	13.4101	11.3366	11.0956	11.4679	11.5016	13.9797	13.6385	14.7161	14.4424	13.07	12.7038	14.1864	13.8705	14.6842	14.3018	12.3167
2006-05-27	14.4986	14.1648	12.3468	12.0569	10.9805	10.6815	12.6852	12.3111	11.8806	11.5484	13.9286	13.5002	8.17558	8.14694	11.7815	11.7554	13.2371	13.1848	14.4208	14.2323	15.0272	14.7611	7.8297	7.86147	9.61377	9.55246	13.0744	12.932	13.6747	13.5063	13.5491	13.3228	13.8908	13.659	10.9233	11.5618	11.1037	11.9337	13.5631	14.2209	14.3494	14.9029	12.9544	12.9368	14.2061	13.9456	14.5683	14.5434	12.2071
2006-05-28	13.9481	15.042	11.6015	13.2187	10.4221	11.6125	12.0999	13.2315	11.375	12.3643	13.3039	14.5255	7.88254	8.57633	11.3833	12.264	13.102	13.3488	14.1497	14.6534	14.659	15.3556	7.39305	8.461	9.13568	10.2543	12.536	13.7516	13.2619	14.1244	13.2812	13.7617	13.5175	14.2736	10.5722	12.3451	10.7554	12.7708	13.1361	14.984	13.9745	15.6257	12.7287	13.391	13.9037	14.4781	14.3285	15.0059	12.1683
2006-05-29	13.6121	15.3819	11.234	13.494	10.1038	11.9015	11.7322	13.619	11.0529	12.7047	12.8964	14.9633	7.58449	8.58038	10.967	12.2854	12.9404	13.4034	13.8189	14.8165	14.2116	15.5791	6.97035	8.40662	8.6466	10.2769	11.9635	13.8414	12.7984	14.2589	12.9445	13.9559	13.0814	14.4565	10.4645	12.1744	10.7232	12.4912	13.0189	14.8811	13.8621	15.5394	12.6812	13.3364	13.7681	14.6888	14.2772	14.966	12.714
2006-05-30	13.5542	15.2254	11.1735	13.3089	10.0495	11.7422	11.6684	13.4518	10.9968	12.5558	12.8252	14.7741	7.41843	8.49377	10.7397	12.1785	12.8451	13.3515	13.6079	14.6724	13.9239	15.3777	6.74841	8.30894	8.37204	10.1296	11.6294	13.6452	12.5195	14.0866	12.7235	13.7963	12.8051	14.2657	10.3427	11.8292	10.6137	12.1551	12.889	14.4858	13.7476	15.1902	12.5748	13.1933	13.6983	14.4286	14.1631	14.8151	12.333
2006-05-31	12.3126	14.9703	9.3194	12.9581	8.89489	11.4659	10.3601	13.1864	9.923	12.3203	11.5529	14.4789	6.9034	8.41564	9.8624	12.0853	12.4656	13.3329	13.1089	14.6362	13.3099	15.3262	5.65992	8.21534	7.27007	10.0387	10.4154	13.5527	11.4885	14.0292	12.2735	13.7659	12.2468	14.2013	8.7269	11.6875	9.52944	12.1929	11.1386	14.3302	12.183	15.045	11.6681	13.0216	12.8583	14.2741	13.1284	14.6386	12.0185
2006-06-01	11.9297	14.9207	9.15497	12.9625	8.51688	11.4396	9.91308	13.1231	9.49374	12.2642	10.965	14.4036	6.61643	8.51389	9.51403	12.1972	12.3057	13.3397	12.6604	14.6325	12.6809	15.3237	5.47835	8.37568	6.87183	10.1791	9.83583	13.6821	11.0003	14.0928	11.7783	13.7455	11.6448	14.2278	8.73177	11.7948	9.49704	12.2066	11.0614	14.4309	12.0876	15.1334	11.576	13.0893	12.2316	14.2093	13.0623	14.7041	12.4995
2006-06-02	12.4037	14.9817	9.71966	13.0145	8.95372	11.4933	10.4276	13.1918	9.93454	12.325	11.5123	14.4819	6.79656	8.59616	9.83809	12.2999	12.4556	13.3917	12.8394	14.7768	12.8946	15.5251	5.89874	8.45026	7.35632	10.2973	10.4105	13.8428	11.4939	14.2372	11.9358	13.9059	11.8308	14.417	9.31414	11.8168	9.6532	12.2708	11.7113	14.4552	12.6842	15.1625	11.7105	13.2495	12.5361	14.4263	13.207	14.8695	12.3147
2006-06-03	13.073	14.7868	10.6664	12.7289	9.59799	11.2784	11.1396	12.9906	10.5324	12.1477	12.2355	14.2618	7.19357	8.47316	10.4617	12.1557	12.7179	13.3585	13.2628	14.7018	13.4416	15.418	6.4825	8.25966	7.99248	10.1005	11.136	13.6321	12.0954	14.0966	12.3446	13.8353	12.3441	14.2932	9.93648	11.7549	10.3248	12.2563	12.3897	14.3719	13.2955	15.0954	12.0096	13.2011	12.7893	14.4647	13.5489	14.8242	12.3772
2006-06-04	13.7298	14.8641	11.473	12.9148	10.2372	11.3901	11.849	13.0592	11.1474	12.2077	13.0029	14.3309	7.63321	8.51489	11.0839	12.1999	12.9586	13.3453	13.7398	14.6491	14.0835	15.3464	7.11289	8.35556	8.71193	10.1598	11.9718	13.6627	12.7704	14.0816	12.8257	13.7652	12.9696	14.2466	10.3204	11.8912	10.6826	12.3024	12.8328	14.4851	13.6971	15.2005	12.2392	13.2476	13.1751	14.425	13.7993	14.8676	12.9821
2006-06-05	14.0046	15.7604	11.7787	14.1082	10.5005	12.3944	12.1489	13.9732	11.4104	13.0437	13.3355	15.3999	7.85792	9.0683	11.3731	12.7437	13.078	13.4409	14.0354	14.9498	14.4932	15.8032	7.40401	9.1687	9.08665	11.0243	12.4357	14.6051	13.1557	14.6694	13.1417	14.0599	13.3667	14.8081	10.7138	12.887	11.0375	13.2394	13.214	15.3788	14.0527	16.0322	12.4996	13.7206	13.4459	14.7955	14.0825	15.3258	13.1831
2006-06-06	13.774	16.744	11.3981	15.1699	10.2548	13.4128	11.9107	15.0032	11.2103	13.9943	13.0971	16.6402	7.58955	9.65151	10.9543	13.3094	12.9422	13.6122	13.8649	15.5004	14.2819	16.6115	6.95413	9.90899	8.66012	11.9445	12.0009	15.7174	12.8378	15.4695	13.0043	14.6561	13.1475	15.6712	10.4938	13.8468	10.8508	14.3527	13.0304	16.3132	13.8888	16.9167	12.4427	14.1736	13.5512	15.4114	14.0197	15.7698	12.7255
2006-06-07	13.5628	17.1471	11.1819	15.5681	10.0575	13.797	11.678	15.4427	11.0053	14.3884	12.836	17.1484	7.47917	9.82664	10.8479	13.5311	12.8809	13.7175	13.6329	15.7861	13.9482	17.0095	6.85974	10.1129	8.46582	12.2435	11.716	16.1107	12.5808	15.8144	12.7347	14.9707	12.8306	16.0479	10.3095	14.11	10.7604	14.643	12.8193	16.6176	13.6937	17.2087	12.3821	14.4419	13.3948	15.765	13.9548	16.027	12.9993
2006-06-08	13.4689	16.9008	11.0457	15.2589	9.9635	13.4875	11.5786	15.2167	10.9212	14.1556	12.734	16.8297	7.53588	9.67182	10.9197	13.4307	12.9129	13.721	13.7158	15.7474	14.0635	16.9328	6.92915	9.9029	8.56106	12.0209	11.8377	15.8684	12.6845	15.6963	12.8248	14.933	12.941	15.9225	10.1484	13.9644	10.5707	14.5536	12.7525	16.4725	13.5915	17.0781	12.4036	14.4905	13.4201	15.9284	13.9782	16.0857	13.1088
2006-06-09	14.071	16.5006	11.9951	14.8315	10.6036	13.0836	12.2033	14.7908	11.4522	13.7683	13.3744	16.3284	7.81835	9.4908	11.3347	13.2483	13.0467	13.6629	13.9225	15.5669	14.3324	16.6703	7.38352	9.6721	9.01501	11.7322	12.3182	15.5183	13.0402	15.439	13.0091	14.7377	13.2192	15.6463	10.6446	13.6878	11.0391	14.1786	13.2516	16.1979	14.0369	16.824	12.6582	14.1813	13.6286	15.7435	14.2516	15.8111	13.2541
2006-06-10	14.7215	16.5183	12.7309	14.89	11.2408	13.1353	12.9086	14.7923	12.0744	13.7806	14.1631	16.3497	8.19883	9.51871	11.819	13.2403	13.2159	13.632	14.3191	15.504	14.8826	16.593	7.91962	9.72426	9.64074	11.761	13.0499	15.5278	13.6098	15.4005	13.4191	14.665	13.774	15.5992	11.4534	13.6058	11.8699	14.0966	13.9841	16.0721	14.7482	16.7108	13.0041	14.0063	14.06	15.3776	14.6143	15.6263	13.4785
2006-06-11	14.5054	16.7811	12.3276	15.1846	10.9798	13.4198	12.696	15.0604	11.8912	14.0332	13.9448	16.6823	8.03187	9.72393	11.58	13.4012	13.1804	13.6559	14.3332	15.6188	14.9118	16.7764	7.59361	9.99329	9.38333	12.0682	12.8361	15.8802	13.5079	15.6123	13.4744	14.7865	13.7638	15.8272	11.2765	13.9364	11.7315	14.5639	13.8544	16.3398	14.6421	16.9649	12.8216	14.2822	14.0949	15.502	14.4281	15.868	13.2058
2006-06-12	14.6307	16.9779	12.655	15.3889	11.1613	13.6186	12.8061	15.2687	11.9837	14.2245	14.0461	16.9318	8.09502	9.825	11.6903	13.5281	13.1694	13.7157	14.2033	15.7816	14.7209	17.0034	7.77794	10.1112	9.46935	12.2403	12.8454	16.1061	13.4486	15.8095	13.2972	14.9657	13.6119	16.0425	11.35	14.2924	11.6617	14.9629	13.9601	16.6821	14.7022	17.2914	12.8286	14.4652	13.8887	15.8614	14.4325	16.0574	13.3066
2006-06-13	15.3331	17.2244	13.5427	15.661	11.9032	13.902	13.5447	15.5066	12.6442	14.4619	14.8832	17.2548	8.49861	10.0002	12.1751	13.6116	13.3215	13.6946	14.5803	15.7951	15.2516	17.0545	8.35275	10.3368	10.1279	12.4774	13.6044	16.3637	14.0154	15.9119	13.6854	14.9776	14.1645	16.1604	11.881	14.4709	12.1199	15.0532	14.4583	16.8663	15.1738	17.4657	13.3293	14.4043	14.3434	15.8644	14.9401	16.0091	13.6466
2006-06-14	15.6454	17.909	13.8385	16.3104	12.1884	14.68	13.8922	16.1406	12.951	15.1331	15.2763	18.2078	8.67813	10.5677	12.3924	13.875	13.4146	13.6762	14.8351	15.966	15.6089	17.3956	8.57194	10.9718	10.4289	13.2218	13.9883	17.2456	14.3371	16.3306	13.9638	15.1711	14.5108	16.6826	12.1526	15.0096	12.1708	15.6399	14.742	17.2951	15.4411	17.8849	13.6397	14.8143	14.8842	15.9493	15.2618	16.3325	13.7447
2006-06-15	15.7194	18.5366	13.9481	16.9156	12.2775	15.2641	13.965	16.8316	13.0187	15.7485	15.3627	18.9995	8.79241	11.0592	12.5141	14.2938	13.4393	13.8244	14.902	16.4596	15.7077	18.1282	8.74375	11.5071	10.6099	13.9509	14.1846	18.1816	14.4639	17.005	14.0286	15.7203	14.6284	17.4582	12.4603	15.3741	12.6348	16.0292	15.0348	17.6939	15.7109	18.266	13.861	15.1528	15.101	16.5537	15.4753	16.6692	13.6018
2006-06-16	16.2672	18.4168	14.6539	16.8236	12.9099	15.1126	14.5104	16.7414	13.5337	15.6288	16.0347	18.8101	9.2222	11.1065	12.9097	14.453	13.5012	13.9211	15.1273	16.6784	16.0575	18.4114	9.3615	11.5868	11.2744	14.0872	14.9146	18.3667	14.9092	17.2355	14.2531	15.9577	15.0664	17.6881	13.0236	15.2543	13.2411	15.9653	15.5481	17.6103	16.1953	18.1824	14.2486	15.1419	15.4561	16.6517	15.8356	16.6773	13.4467
2006-06-17	16.621	18.2416	14.9785	16.651	13.2203	14.9578	14.9112	16.5406	13.8826	15.4574	16.4785	18.5963	9.38577	11.0987	13.1491	14.3668	13.6388	13.8634	15.4857	16.5556	16.549	18.2571	9.53173	11.5596	11.5678	14.0314	15.3268	18.2882	15.3092	17.1138	14.6516	15.8252	15.5103	17.5716	13.3452	15.2529	13.6601	15.9213	15.8844	17.5597	16.5127	18.1387	14.5199	15.1329	15.8689	16.5758	16.1012	16.6588	13.8319
2006-06-18	15.9579	18.2995	14.0938	16.7035	12.4535	15.0186	14.2487	16.5973	13.2635	15.5144	15.6775	18.6753	8.92196	11.12	12.6954	14.4323	13.5616	13.9026	15.2403	16.6452	16.1748	18.3735	8.84815	11.5942	10.8438	14.0895	14.54	18.3667	14.822	17.209	14.4122	15.9224	15.0463	17.667	12.97	15.3326	13.434	15.9909	15.5599	17.65	16.2184	18.2246	14.1833	15.2646	15.8097	16.6435	15.8191	16.7616	13.7493
2006-06-19	15.554	18.0012	13.7509	16.4224	12.1044	14.6438	13.7907	16.3509	12.8614	15.2221	15.1614	18.2385	8.69177	10.7163	12.4067	14.3512	13.4164	13.9824	14.8392	16.6599	15.6154	18.2979	8.59402	11.1799	10.4501	13.6222	14.0097	17.8182	14.3491	17.0474	13.9669	15.9293	14.5205	17.4161	12.6048	15.1039	13.1484	15.7605	15.1838	17.4786	15.8624	18.0548	13.8308	15.1915	15.2441	16.7652	15.4611	16.7306	13.9318
2006-06-20	16.233	17.0709	14.6303	15.4127	12.8876	13.6349	14.4675	15.4105	13.499	14.3237	15.9922	17.0432	9.23907	10.0582	12.892	13.824	13.4689	13.8565	15.0586	16.1633	15.9711	17.535	9.39815	10.3825	11.2863	12.6386	14.9052	16.6304	14.8594	16.2699	14.1744	15.3862	15.0078	16.5455	13.1434	14.1699	13.6094	14.7526	15.6402	16.663	16.2828	17.278	14.1027	14.6398	15.2709	16.384	15.696	16.26	13.9562
2006-06-21	17.3283	16.6355	15.7763	15.0151	14.0714	13.2547	15.5667	14.9162	14.5616	13.8941	17.4195	16.4971	10.0211	9.84161	13.5369	13.5282	13.6219	13.7057	15.6487	15.7652	16.8738	16.9854	10.365	10.1352	12.4659	12.2594	16.3191	16.1218	15.789	15.8038	14.8162	14.9469	16.0364	16.0365	14.1888	13.7957	14.7484	14.1944	16.5773	16.2009	17.1786	16.8402	14.7639	14.3141	15.8773	15.754	16.2851	15.9232	14.3881
2006-06-22	18.0317	16.7322	16.4538	15.115	14.7461	13.3503	16.3246	15.0199	15.2512	13.9881	18.3187	16.6188	10.5123	9.88892	13.9666	13.5754	13.7627	13.7222	16.125	15.8164	17.5811	17.0598	10.9309	10.1928	13.2112	12.3346	17.2544	16.2152	16.4571	15.874	15.3424	15.003	16.7915	16.1134	14.8349	13.813	15.3086	14.2835	17.2326	16.2255	17.8056	16.8637	15.1216	14.2766	16.5193	15.6746	16.6417	15.8836	14.4837
2006-06-23	18.0709	16.786	16.4954	15.176	14.7631	13.4094	16.3851	15.0743	15.2894	14.0397	18.3546	16.6869	10.6052	9.88741	14.1274	13.5825	13.8509	13.7297	16.3437	15.8322	17.8761	17.0797	11.0445	10.1893	13.3916	12.336	17.4985	16.2209	16.7031	15.8872	15.5823	15.0206	17.0527	16.1277	14.8198	13.8979	15.3342	14.3531	17.2707	16.2975	17.8416	16.9307	15.0668	14.3761	16.6064	15.7197	16.6163	15.9693	14.4879
2006-06-24	17.9027	17.3879	16.3325	15.8333	14.5821	14.1339	16.2195	15.6264	15.1247	14.6201	18.1286	17.499	10.4279	10.2832	14.045	13.7214	13.8586	13.661	16.2944	15.8272	17.7752	17.156	10.8423	10.6658	13.1576	12.8421	17.224	16.7792	16.5749	16.0758	15.5269	15.014	16.8939	16.3691	14.677	14.6893	15.0058	15.0878	17.1192	16.9476	17.6955	17.555	15.0097	14.8085	16.4635	15.9945	16.553	16.3354	14.479
2006-06-25	17.9419	17.9843	16.3674	16.4119	14.6611	14.6789	16.227	16.2926	15.1631	15.2089	18.2046	18.2432	10.4011	10.6305	13.9351	14.1036	13.7813	13.8233	16.1224	16.2955	17.5528	17.8215	10.8089	11.0686	13.0753	13.4068	17.0978	17.5083	16.4041	16.6694	15.338	15.5302	16.7173	17.0248	14.7531	15.0404	15.0192	15.534	17.1687	17.3963	17.7462	17.9772	15.0228	15.1823	16.475	16.526	16.5643	16.6851	14.4829
2006-06-26	18.278	17.4043	16.6704	15.7742	15.0183	13.9802	16.5527	15.7598	15.4946	14.6458	18.6677	17.4629	10.7143	10.1683	14.0522	13.96	13.757	13.9195	16.1892	16.3359	17.7085	17.7764	11.1433	10.5113	13.4681	12.825	17.5668	16.8741	16.605	16.4807	15.4169	15.5763	16.9828	16.7757	15.0808	14.4956	15.4043	15.1376	17.4155	16.9409	17.9936	17.5397	15.1274	14.8819	16.5172	16.6128	16.6454	16.4793	14.523
2006-06-27	18.5233	16.335	16.9021	14.574	15.2524	12.864	16.8161	14.6391	15.7354	13.6182	18.9835	16.1308	10.9769	9.46814	14.2999	13.2724	13.8521	13.713	16.4861	15.679	18.141	16.8138	11.4361	9.61315	13.8714	11.7169	18.0857	15.5407	16.9978	15.5212	15.7459	14.8674	17.4271	15.7475	15.4307	13.6331	15.8798	14.2175	17.7319	16.1128	18.3043	16.761	15.3971	14.1668	16.6989	15.8428	16.8605	15.8078	14.6089
2006-06-28	18.4606	16.1517	16.861	14.4867	15.1651	12.7557	16.7783	14.407	15.6722	13.4273	18.8753	15.891	10.9212	9.33703	14.3592	13.0695	13.9121	13.5877	16.5897	15.3552	18.2567	16.3714	11.3953	9.48632	13.8458	11.4767	18.0661	15.1923	17.0736	15.1699	15.8563	14.5057	17.4845	15.3541	15.4717	13.4309	16.0522	13.9621	17.8117	15.8512	18.3769	16.5112	15.4533	13.8877	16.9831	15.2421	16.9486	15.5112	14.618
2006-06-29	18.2045	16.7577	16.6236	15.1863	14.896	13.43	16.525	15.0157	15.4204	14.0074	18.5285	16.6582	10.7935	9.79554	14.2447	13.3857	13.8711	13.6013	16.4563	15.525	18.0602	16.6705	11.2522	10.0943	13.6521	12.1431	17.8191	15.9361	16.8923	15.5659	15.7084	14.6806	17.2787	15.7805	15.3459	13.7615	15.8599	14.1238	17.6902	16.1447	18.2594	16.7866	15.4079	14.0497	16.8763	15.3134	16.8993	15.6567	14.6064
2006-06-30	17.7809	16.9729	16.2023	15.3562	14.4214	13.5812	16.1199	15.282	15.0071	14.223	17.9549	16.9214	10.446	9.87375	14.1262	13.6232	13.9181	13.7777	16.4267	15.9329	17.946	17.2063	10.8619	10.1591	13.2158	12.3381	17.3169	16.251	16.7042	15.9686	15.6725	15.1338	17.0288	16.2168	15.0047	13.8912	15.527	14.379	17.4131	16.3	17.9883	16.9338	15.2355	14.2487	16.8348	15.5736	16.773	15.8493	14.546
2006-07-01	17.496	16.8354	15.9309	15.2296	14.1705	13.4613	15.7954	15.1256	14.7272	14.0875	17.6019	16.7496	10.3075	9.64277	13.8604	13.3902	13.7606	13.6994	16.0448	15.6906	17.4346	16.8547	10.7007	9.87077	12.9366	11.9697	16.9262	15.7986	16.2886	15.631	15.2522	14.8702	16.5857	15.8508	14.8816	13.8159	15.2854	14.3718	17.2361	16.232	17.8228	16.8703	15.055	14.3547	16.5702	15.7295	16.6022	15.9533	14.4908
2006-07-02	17.9129	16.8705	16.3262	15.2664	14.6661	13.4968	16.1639	15.1627	15.1358	14.1215	18.1948	16.7939	10.7569	9.62618	14.0134	13.3447	13.7164	13.6638	16.1211	15.6062	17.634	16.7428	11.1744	9.86057	13.4906	11.9307	17.5873	15.7331	16.5572	15.5485	15.3446	14.7756	16.9493	15.7589	15.3001	14.1535	15.7472	14.8378	17.5585	16.5003	18.1433	17.1235	15.3072	14.6554	16.5454	15.9069	16.7733	16.2099	14.5757
2006-07-03	18.5641	17.0994	16.9058	15.533	15.3222	13.7721	16.8202	15.3777	15.7789	14.3404	19.0771	17.0936	11.2008	9.93994	14.3655	13.5309	13.8353	13.6548	16.5356	15.6893	18.2576	16.9081	11.645	10.2666	14.1314	12.3725	18.4128	16.2246	17.1337	15.7863	15.8078	14.8611	17.6221	16.0238	15.7611	14.5302	16.3793	15.2956	17.9908	16.8748	18.5666	17.4802	15.6527	14.8474	16.9796	16.2685	17.0788	16.405	14.6764
2006-07-04	18.8673	17.5252	17.1969	15.9661	15.6045	14.227	17.1533	15.8062	16.0763	14.7554	19.4606	17.6517	11.2953	10.2371	14.5283	13.8167	13.92	13.7558	16.7475	16.0089	18.5436	17.3743	11.7692	10.6184	14.3183	12.8379	18.6584	16.8084	17.3771	16.2221	16.0393	15.2126	17.8771	16.5079	15.9465	14.6985	16.5738	15.3871	18.1943	17.0463	18.7613	17.6436	15.8984	14.9326	17.2313	16.3428	17.2818	16.4786	14.7447
2006-07-05	18.6753	17.5383	17.0664	15.9567	15.3688	14.175	17.0111	15.8658	15.8829	14.7707	19.1494	17.6435	11.0739	10.1878	14.4967	13.8564	13.9621	13.8131	16.7512	16.1129	18.4942	17.4956	11.5657	10.5556	14.0775	12.8011	18.3623	16.791	17.2919	16.2922	16.0354	15.3275	17.7326	16.5748	15.7597	14.5066	16.1995	15.2275	18.0801	16.9087	18.6394	17.5106	15.7443	14.7941	17.4284	16.3597	17.2221	16.3778	14.6987
2006-07-06	18.3742	17.4594	16.7713	15.8992	15.0959	14.1495	16.6716	15.7457	15.5881	14.6909	18.7769	17.5614	10.9189	10.1961	14.2962	13.7853	13.8673	13.7484	16.4957	15.9786	18.1389	17.3274	11.3819	10.5699	13.81	12.7775	18.0121	16.7349	16.9831	16.1747	15.7544	15.1793	17.3973	16.4539	15.4989	14.4037	15.7873	15.025	17.8166	16.7776	18.3852	17.3864	15.5194	14.823	17.0364	16.1819	17.0024	16.3743	14.6383
2006-07-07	18.5504	17.732	16.9034	16.1677	15.3014	14.4308	16.8163	16.0254	15.7644	14.9584	19.0478	17.918	11.0405	10.3624	14.3044	13.9041	13.8368	13.7726	16.4784	16.0899	18.1469	17.5034	11.4936	10.7643	13.9381	13.0179	18.1671	17.0267	17.0159	16.356	15.7398	15.3021	17.4626	16.6625	15.6768	14.6301	16.2288	15.1861	17.9038	16.9662	18.4825	17.5675	15.7107	14.9259	16.9795	16.3584	17.1154	16.4761	14.6965
2006-07-08	18.9381	18.05	17.204	16.4631	15.7021	14.7853	17.1783	16.3235	16.152	15.2705	19.6109	18.3599	11.2959	10.6402	14.4032	14.0312	13.8367	13.7659	16.5742	16.1798	18.3292	17.6793	11.7325	11.0685	14.2456	13.3799	18.56	17.4603	17.207	16.5647	15.8535	15.4047	17.7211	16.9254	16.0785	15.0889	16.6647	15.7685	18.2554	17.3638	18.8338	17.9539	15.9557	15.1673	17.3236	16.4642	17.3355	16.6644	14.759
2006-07-09	19.1581	18.4027	17.459	16.7881	15.8857	15.1377	17.457	16.6864	16.3633	15.6175	19.846	18.8285	11.4449	10.8941	14.5749	14.238	13.9135	13.8335	16.7899	16.4161	18.6335	18.0339	11.9036	11.3473	14.4906	13.7531	18.8796	17.935	17.4747	16.8966	16.0914	15.6676	18.0162	17.3084	16.1908	15.5023	16.8088	16.2966	18.432	17.7582	18.9937	18.337	15.9932	15.3953	17.475	16.7894	17.3891	16.8755	14.7683
2006-07-10	18.8867	18.5452	17.2416	16.9231	15.6017	15.273	17.2027	16.84	16.0928	15.7574	19.4555	19.0114	11.2859	10.9467	14.6058	14.3289	13.9754	13.8819	16.8591	16.5366	18.6796	18.1966	11.7815	11.4143	14.353	13.8562	18.7085	18.0723	17.482	17.0339	16.1589	15.7995	17.9717	17.453	16.0407	15.6026	16.5873	16.2438	18.2964	17.8951	18.8589	18.4644	15.8863	15.4556	17.4258	16.9242	17.3129	16.9398	14.7398
2006-07-11	18.6308	18.6127	17.0071	16.9752	15.3508	15.3493	16.9363	16.898	15.8409	15.8258	19.1173	19.1128	11.1091	11.0034	14.4249	14.3071	13.9007	13.8493	16.637	16.4904	18.3606	18.1528	11.5828	11.4616	14.0744	13.9024	18.3475	18.1239	17.1967	17.0127	15.9132	15.7514	17.6523	17.4488	15.8689	15.6163	16.4315	16.0499	18.1469	17.8861	18.7102	18.4587	15.7075	15.4827	17.2775	16.9311	17.1702	16.9591	14.6907
2006-07-12	18.5971	18.7598	16.9627	17.0928	15.3324	15.5052	16.8839	17.0344	15.8089	15.9785	19.0902	19.3257	11.1296	11.1366	14.3925	14.3813	13.8725	13.8629	16.5861	16.5688	18.3025	18.2828	11.5928	11.5959	14.0768	14.0774	18.3466	18.3463	17.1556	17.1415	15.8592	15.8408	17.6199	17.6089	15.8741	15.7358	16.4986	16.2125	18.1057	17.9845	18.6777	18.5572	15.7325	15.6269	17.1076	16.9872	17.1541	17.0637	14.7003
2006-07-13	18.7128	18.9361	17.0598	17.2381	15.4525	15.6835	16.9951	17.206	15.9238	16.1953	19.253	19.5732	11.1883	11.2673	14.4386	14.4471	13.8879	13.8728	16.6403	16.6387	18.3842	18.4018	11.655	11.723	14.1613	14.2438	18.4555	18.5594	17.2312	17.2599	15.9197	15.9213	17.7083	17.76	15.9462	15.9348	16.6071	16.4663	18.1971	18.149	18.7633	18.7229	15.8621	15.8833	17.2684	17.1851	17.2668	17.2632	14.735
2006-07-14	18.8183	18.9135	17.151	17.2663	15.5581	15.6278	17.1006	17.2309	16.0281	16.2152	19.3974	19.4908	11.1634	11.1547	14.4629	14.5359	13.9115	13.965	16.6799	16.7878	18.4272	18.5591	11.6397	11.6485	14.1502	14.1816	18.4443	18.4921	17.2599	17.3603	15.9614	16.0774	17.7275	17.8195	15.8789	15.8742	16.4589	16.4546	18.1476	18.1731	18.7123	18.7324	15.8209	15.8968	17.358	17.453	17.2584	17.3249	14.7229
2006-07-15	19.0242	18.6939	17.2669	17.0528	15.7894	15.4252	17.258	16.9868	16.2383	15.9681	19.7381	19.2159	11.3814	11.0941	14.3745	14.3459	13.7984	13.8504	16.5258	16.5267	18.2913	18.2201	11.7878	11.5504	14.3087	14.0151	18.6426	18.2659	17.1896	17.084	15.8061	15.7939	17.7353	17.5424	16.0415	15.8472	16.6897	16.4523	18.2208	18.0771	18.7996	18.6504	15.8541	15.786	17.235	17.2842	17.2552	17.222	14.7332
2006-07-16	19.4582	18.5573	17.569	16.9527	16.2181	15.2585	17.6585	16.8814	16.6757	16.3665	20.3873	19.0003	11.7663	10.9576	14.6007	14.4377	13.8616	13.9575	16.7989	16.6978	18.7272	18.4001	12.1441	11.4434	14.8017	13.925	19.2955	18.174	17.5939	17.1916	16.1183	15.9744	18.2418	17.6071	16.3986	15.8166	17.1005	16.5814	18.5382	18.1129	19.1188	18.6746	16.0683	15.6907	17.3696	17.2179	17.4127	17.1482	14.7864
2006-07-17	19.8143	18.4161	17.8921	16.8023	16.5503	15.1483	18.0394	16.703	17.0268	16.6206	20.8531	18.8435	12.0107	10.8314	14.7408	14.2205	13.9027	13.8407	16.9727	16.4075	19.0048	18.0083	12.3613	11.2852	15.1071	13.6791	19.7059	17.845	17.848	16.8623	16.3177	15.6565	18.5635	17.2591	16.6616	15.7864	17.4196	16.5375	18.7825	18.0333	19.3634	18.605	16.361	15.6908	17.5902	17.1181	17.6296	17.1296	14.8523
2006-07-18	19.8725	18.6041	17.9471	16.9607	16.6043	15.3467	18.1029	16.8816	17.0839	18.7777	20.9272	19.1092	12.0591	10.9883	14.8863	14.278	13.9819	13.8335	17.1578	16.4517	19.2452	18.1011	12.4562	11.4414	15.2473	13.871	19.882	18.0821	18.0527	16.9693	16.517	15.7092	18.7631	17.4036	16.7998	15.9153	17.5486	16.5325	18.9273	18.1535	19.5046	18.7231	16.5835	15.7829	17.8884	17.1926	17.8208	17.2024	14.9022
2006-07-19	19.5682	18.4969	17.8811	16.9044	16.2492	15.1771	17.9348	16.8392	16.7627	18.4213	20.3347	18.9032	11.6699	10.8815	14.9321	14.3818	14.0939	13.9424	17.2501	16.6378	19.2593	18.3073	12.1926	11.3594	14.9188	13.8158	19.4401	18.0371	18.0116	17.1018	16.5946	15.9075	18.5833	17.5023	16.5765	15.7616	17.4001	16.4125	18.8398	18.0742	19.387	18.6348	16.3691	15.7777	18.0956	17.2835	17.7441	17.2166	14.8631
2006-07-20	18.7565	18.3288	17.123	16.7103	15.4739	15.0764	17.0677	16.5962	15.9645	17.5968	19.2829	18.7439	11.3026	10.8199	14.5357	14.1876	13.9231	13.8207	16.7566	16.3615	18.5567	17.9483	11.7773	11.2682	14.3298	13.6496	18.6732	17.8043	17.3888	16.8136	16.0494	15.6064	17.8903	17.2096	16.1741	15.7036	17.0094	16.3937	18.4188	17.9491	18.9801	18.5233	15.976	15.8653	17.5948	17.2186	17.4023	17.2588	14.7637
2006-07-21	18.7998	18.654	17.0903	17.0081	15.5655	15.3937	17.0416	16.9357	16.0144	18.559	19.4179	19.173	11.4091	11.0182	14.4652	14.2937	13.8505	13.8358	16.645	16.4678	18.4455	18.1283	11.84	11.4715	14.3904	13.9099	18.7486	18.1313	17.3182	16.9968	15.9348	15.7276	17.8615	17.4382	16.1408	15.9812	16.9077	16.6914	18.3523	18.1714	18.9216	18.749	15.9203	16.106	17.3174	17.3967	17.3126	17.4407	14.7504
2006-07-22	19.1933	18.7188	17.4312	17.08	15.9455	15.4456	17.4456	17.0179	16.404	17.1081	19.9498	19.2437	11.6349	11.0943	14.5955	14.4112	13.8844	13.8954	16.7992	16.6205	18.6935	18.3365	12.0521	11.5665	14.6805	14.0518	19.1301	18.3184	17.5508	17.1748	16.1111	15.8949	18.1531	17.6274	16.304	16.036	16.9394	16.7394	18.4728	18.3009	19.0482	18.8617	16.0781	16.1646	17.4188	17.6638	17.4289	17.5317	14.7893
2006-07-23	19.3002	18.4916	17.5548	16.8958	16.037	15.183	17.5794	16.8233	16.5067	16.4763	20.0653	18.905	11.707	10.8642	14.7154	14.377	13.9448	13.945	16.9524	16.6366	18.9011	18.3019	12.1484	11.3411	14.8223	13.7949	19.3141	18.0125	17.7294	17.0931	16.2783	15.9059	18.34	17.4899	16.405	15.8485	17.0016	16.55	18.6046	18.1243	19.1704	18.6886	16.129	15.9905	17.6034	17.5707	17.4978	17.4066	14.802
2006-07-24	19.3566	18.2304	17.5098	16.6422	16.1175	14.9425	17.5711	16.5328	16.572	17.89	20.2259	18.5781	11.8081	10.6974	14.6437	14.1613	13.8801	13.8426	16.8529	16.3608	18.8045	17.9186	12.1896	11.1442	14.8667	13.5075	19.381	17.6356	17.6623	16.7604	16.1781	15.6026	18.3187	17.1284	16.4796	15.7117	17.148	16.4641	18.6243	17.9992	19.202	18.5657	16.284	15.9626	17.5335	17.3573	17.5734	17.3466	14.8348
2006-07-25	19.4696	18.3381	17.756	16.7298	16.1765	15.0722	17.7978	16.6211	16.6691	17.5186	20.2419	18.7413	11.613	10.7524	14.8856	14.1774	14.0774	13.8355	17.1944	16.3667	19.1762	17.9387	12.1326	11.2014	14.8363	13.5738	19.3331	17.7145	17.9354	16.7898	16.5324	15.6102	18.4946	17.1698	16.449	15.7042	17.2669	16.3608	18.6843	17.9671	19.2408	18.5382	16.3104	16.0008	17.852	17.4624	17.6579	17.3912	14.8469
2006-07-26	18.6778	18.4026	17.0804	16.8063	15.3421	15.1081	17.0418	16.7174	15.8844	18.4779	19.1285	18.7996	10.9431	10.7154	14.5051	14.2132	14.0131	13.8753	16.8082	16.4357	18.5346	18.0164	11.4373	11.1688	13.9441	13.553	18.2125	17.7	17.2891	16.8386	16.0941	15.6844	17.6987	17.2087	15.9322	15.6739	16.6886	16.2287	18.2654	17.965	18.8169	18.5321	15.8945	16.0431	17.6623	17.4488	17.3633	17.4142	14.7391
2006-07-27	18.1128	18.1767	16.5336	16.5972	14.8164	14.8667	16.4188	16.4974	15.3394	16.9018	18.4171	18.4911	10.7269	10.7816	14.1391	14.1347	13.8159	13.8469	16.3165	16.3447	17.8701	17.8831	11.1705	11.072	13.5272	13.4226	17.6527	17.5343	16.7314	16.7155	15.5551	15.5838	17.1072	17.07	15.613	15.5826	16.2917	16.1678	17.8965	17.8744	18.4669	18.4444	15.6399	15.9497	17.126	17.5257	17.0981	17.3723	14.6731
2006-07-28	18.1589	17.9298	16.5727	16.3589	14.8768	14.6081	16.4532	16.2489	15.3762	19.1217	18.4887	18.1632	10.8116	10.7453	14.2318	14.0749	13.8555	13.8649	16.4306	16.3228	18.0324	17.8197	11.268	10.8905	13.6644	13.2174	17.8302	17.2967	16.8758	16.6206	15.681	15.5581	17.2671	16.9463	15.6032	15.5097	16.2835	16.1294	17.8866	17.8102	18.4573	18.3813	15.7179	15.7354	17.1045	17.3108	17.1442	17.1945	14.6971
2006-07-29	18.1531	17.9896	16.5741	16.4095	14.8461	14.7184	16.4701	16.2676	16.4509	19.1836	18.4623	18.2756	10.7376	10.9883	14.2311	13.9757	13.8807	13.773	16.4552	16.143	18.0459	17.6015	11.1938	10.9224	13.5858	13.206	17.7412	17.2513	16.8668	16.4698	15.7061	15.3618	17.2411	16.8021	15.5392	15.537	16.1928	16.3302	17.8413	17.8149	18.4111	18.3888	15.8126	15.7129	17.2455	17.1263	17.2314	17.1452	14.7219
2006-07-30	17.8758	18.3358	16.304	16.7266	14.5405	15.0714	16.2026	16.6171	18.0814	19.5276	18.0866	19.618	10.4797	10.6759	14.1024	14.1238	13.8828	13.8222	16.3642	16.3103	17.8742	17.8505	10.903	11.1174	13.2422	13.4654	17.3327	17.579	16.6636	16.7034	15.6037	15.5472	16.9915	17.068	15.2568	15.6101	15.9612	16.3363	17.6317	17.9015	18.2005	18.4704	15.6742	15.6781	17.2805	17.2102	17.149	17.1386	14.6806
2006-07-31	17.4993	18.5431	15.9194	16.9158	14.1397	15.2769	15.8221	16.8308	14.9299	19.7322	17.5948	21.7334	10.2929	10.97	13.9063	14.1913	13.8048	13.7788	16.1325	16.3311	17.5421	17.9469	10.5567	11.2791	12.8068	13.6632	16.8009	17.8212	16.3067	16.8228	15.3486	15.5787	16.6581	17.2821	14.9667	15.5662	15.6054	16.256	17.3453	17.885	17.926	18.4509	15.6017	15.4958	17.0418	17.074	17.0577	16.9932	14.6639
2006-08-01	17.5655	18.7995	16.0064	17.0914	14.2785	15.5644	15.8395	17.0423	15.1219	19.9907	17.7099	22.2371	10.4781	13.3365	13.9286	14.4323	13.7464	13.8608	16.0783	16.6169	17.5148	18.377	10.8005	11.5858	13.0247	14.0422	17.0118	18.2956	16.2513	17.0157	15.2909	15.8983	16.7263	17.746	15.1539	15.8676	15.7816	16.773	17.4476	18.0498	18.0318	18.633	15.7088	15.9182	17.1017	16.9087	17.1379	17.2263	14.6944
2006-08-02	17.8662	19.0371	16.2978	17.3614	14.5588	15.7616	16.1709	17.3414	15.5	20.2197	18.0885	22.5222	10.5088	13.2863	14.1001	14.5518	13.8683	13.9402	16.3444	16.7834	17.8555	18.5841	10.9366	11.762	13.2732	14.3158	17.3637	18.6572	16.6592	17.4059	15.582	16.0772	16.9915	17.8988	15.3724	16.167	15.9964	17.0153	17.6878	18.4074	18.261	18.9704	15.6925	16.2639	17.2221	17.6985	17.1502	17.5978	14.6875
2006-08-03	17.8227	18.9832	16.2545	17.2582	14.503	15.7394	16.135	17.2367	15.7024	20.172	18.0255	22.5061	10.3714	13.1583	13.961	14.4376	13.8147	13.8482	16.1817	16.6153	17.6209	18.3918	10.776	11.7796	13.0552	14.3103	17.0865	18.6442	16.4446	17.2646	15.4028	15.8997	16.7534	17.7894	15.3006	16.2458	16.0328	17.0195	17.6441	18.4433	18.2158	19.0142	15.5169	16.323	17.0917	17.6898	17.0105	17.6301	14.6355
2006-08-04	17.8168	19.1524	16.2499	17.438	14.5143	15.8885	16.1151	17.4372	17.0138	20.3362	18.0272	22.7029	10.4645	13.2304	13.9625	14.5923	13.7776	13.9211	16.1381	16.8116	17.5866	18.6643	10.88	11.9212	13.1576	14.5157	17.1946	18.9124	16.4477	17.5018	15.3559	16.1154	16.7725	18.0462	15.3402	16.2967	16.0884	17.0469	17.6444	18.5339	18.2204	19.0946	15.4013	16.3065	16.8977	17.8018	16.8985	17.6448	14.6036
2006-08-05	17.9347	19.08	16.3633	17.3758	14.6384	15.8176	16.2332	17.3639	15.1579	20.2645	18.1844	22.6044	10.4832	13.4935	14.0562	14.5672	13.8438	13.8899	16.2836	16.7705	17.7735	18.63	10.9062	11.9621	13.224	14.5616	17.2964	18.9725	16.5912	17.4843	15.5152	16.0747	16.9189	18.053	15.3743	16.3066	16.1731	16.9554	17.6984	18.5064	18.2704	19.0754	15.4096	16.284	16.8556	17.6914	16.8968	17.608	14.6079
2006-08-06	18.1182	19.1636	16.5312	17.3859	14.844	15.9235	16.4034	17.4006	18.7456	20.3535	18.4416	22.7762	10.5956	13.5835	14.0224	14.619	13.7748	13.8894	16.1814	16.8269	17.6709	18.7399	11.0229	12.0943	13.3282	14.7385	17.3996	19.207	16.5468	17.5947	15.4054	16.1432	16.8975	18.2101	15.5013	16.5055	16.2478	17.1862	17.7724	18.6498	18.3485	19.2289	15.5033	16.3936	16.9113	17.7169	16.9692	17.6763	14.6369
2006-08-07	18.3459	19.3298	16.7407	17.5971	15.0746	16.0587	16.635	17.6231	19.4831	20.5111	18.7461	21.9358	10.7814	13.5895	14.1918	14.7571	13.8363	13.9776	16.3794	17.0106	17.9614	18.9655	11.2321	12.1426	13.6118	14.8218	17.7612	19.3121	16.8143	17.7776	15.6247	16.3388	17.2005	18.3731	15.7074	16.5693	16.4732	17.2838	17.97	18.7907	18.5412	19.3491	15.6967	16.4056	17.0379	17.8902	17.118	17.7214	14.6921
2006-08-08	18.5193	19.0178	16.8907	17.3606	15.257	15.7302	16.8019	17.3387	18.5398	20.199	18.9883	22.4763	11.0273	13.1851	14.2455	14.6823	13.8001	13.9928	16.3971	16.9434	18.0429	18.8155	11.4673	11.91	13.8918	14.5229	18.104	18.9257	16.9319	17.6136	15.6519	16.2545	17.3803	18.1334	15.9411	16.19	16.7503	16.9456	18.1595	18.499	18.733	19.0473	15.9833	16.0782	17.2586	17.8012	17.3388	17.5068	14.7658
2006-08-09	18.5278	18.8769	16.9226	17.1683	15.2337	15.6352	16.8461	17.1297	15.7383	20.0665	18.9655	22.3595	11.058	13.4428	14.4597	14.4432	13.9406	13.8274	16.7006	16.6116	18.4273	18.4145	11.5437	11.8622	14.0412	14.4143	18.3131	18.7808	17.2369	17.299	15.9801	15.9011	17.6759	17.8585	15.8498	16.1104	16.6614	16.8352	18.1808	18.3014	18.7352	18.8767	16.0432	15.9806	17.5653	17.3358	17.438	17.3531	14.7813
2006-08-10	18.1581	19.1962	16.5806	17.423	14.83	15.9518	16.4932	17.4407	19.3078	18.279	18.4556	19.9634	10.6686	12.9796	14.2699	14.6432	13.9374	13.9008	16.5479	16.8576	18.1466	18.7825	11.1231	12.1165	13.5305	14.7706	17.6933	19.2489	16.9217	17.6319	15.8063	16.177	17.2819	18.2503	15.4879	16.3461	16.2708	17.0374	17.8237	18.5388	18.3898	19.1087	15.8027	16.1903	17.4344	17.495	17.2612	17.5111	14.7164
2006-08-11	17.8367	19.3579	16.2684	17.5955	14.5185	16.0961	16.1485	17.6316	18.0143	20.5182	18.0445	20.1519	10.3674	12.7212	13.979	14.7337	13.8313	13.9479	16.2151	16.9737	17.6622	18.9376	10.7712	12.184	13.0592	14.8707	17.0979	19.3783	16.4733	17.7645	15.4396	16.3031	16.782	18.3864	15.2328	16.4119	15.9186	17.0832	17.5885	18.6182	18.1614	19.1833	15.5551	16.3161	17.1241	17.718	17.0419	17.6323	14.6467
2006-08-12	17.6909	19.3455	16.1218	17.5554	14.3573	16.0937	16.0068	17.5972	18.639	20.0158	17.8492	20.1621	10.2857	13.4231	13.8931	14.6951	13.7971	13.9205	16.1135	16.9219	17.5166	18.8779	10.6751	12.1801	12.9279	14.8603	16.9305	19.3669	16.3411	17.7176	15.3277	16.2489	16.6359	18.3504	14.9856	16.5013	15.5277	17.204	17.3625	18.6581	17.9427	19.234	15.3491	16.5478	16.9194	17.7096	16.8664	17.7598	14.5841
2006-08-13	17.6086	19.4849	16.0436	17.6447	14.2871	16.2341	15.9113	17.7202	18.602	20.6722	17.7484	20.3998	10.2734	12.3206	13.878	14.6767	13.7901	13.8777	16.0945	16.8921	17.49	18.8852	10.6607	12.2838	12.9072	14.9966	16.9034	19.559	16.3178	17.7413	15.3067	16.2274	16.6105	18.4379	14.844	16.632	15.4853	17.4381	17.2153	18.8034	17.8023	19.3731	15.2842	16.786	16.7404	18.0729	16.7915	17.973	14.5689
2006-08-14	17.7028	19.5302	16.1387	17.7619	14.3955	16.2556	15.9994	17.8221	18.7861	20.7105	17.8768	23.2028	10.2883	12.4555	13.8831	14.9145	13.7876	14.0255	16.0946	17.2003	17.4932	19.2619	10.6784	12.3757	12.9261	15.144	16.9245	19.7362	16.3251	18.0513	15.3069	16.5541	16.6199	18.7085	14.8154	16.5983	15.3629	17.3925	17.1822	18.7949	17.7708	19.3586	15.1836	16.7904	16.7317	18.23	16.7197	18.0126	14.5324
2006-08-15	17.5374	19.4145	15.9529	17.5596	14.1688	16.1723	15.8682	17.6311	18.4966	20.6062	17.641	23.0101	10.1944	12.4994	13.8568	14.6731	13.8101	13.8833	16.1087	16.8884	17.4917	18.869	10.5641	12.2542	12.8088	14.9561	16.7984	19.5023	16.2918	17.7237	15.3229	16.2206	16.5749	18.4047	14.6946	16.6155	15.3201	17.3357	17.0939	18.7583	17.684	19.3351	15.1236	16.7543	16.5823	18.1162	16.6533	17.9664	14.5179
2006-08-16	17.1284	19.6301	15.53	17.8178	13.7517	16.3606	15.439	17.9031	18.0982	16.8556	17.1197	20.5311	9.92852	12.771	13.6666	14.8725	13.7851	14.0032	15.9661	17.1463	17.2587	19.1904	10.2298	12.3459	12.4202	15.0996	16.3463	19.6789	16.0272	17.9904	15.1693	16.4956	16.2804	18.6468	14.382	16.645	15.007	17.3173	16.8156	18.8353	17.4184	19.3993	15.0098	16.6953	16.5532	18.1639	16.5668	17.9456	14.4742
2006-08-17	16.9237	19.2565	15.3147	17.5873	13.5425	15.9548	15.2237	17.5982	17.2666	20.4334	16.8603	22.7684	9.84099	12.2326	13.5265	14.7997	13.7044	14.0369	15.7622	17.0853	16.9815	19.0246	10.1346	12.0537	12.2579	14.7218	16.1195	19.1835	15.8008	17.8035	14.9436	16.4125	16.0333	18.3516	14.3117	16.4128	14.7996	17.2181	16.7095	18.6647	17.318	19.2191	14.807	16.5369	16.3459	18.0561	16.3857	17.833	14.4026
2006-08-18	16.9624	18.8343	15.3772	17.1585	13.6088	15.5783	15.2488	17.1106	17.5905	19.987	16.9131	19.4261	9.93787	12.225	13.6009	14.5067	13.7179	13.8849	15.8234	16.7051	17.0781	18.5118	10.2562	11.8293	12.4019	14.3854	16.2888	18.7426	15.9056	17.3663	15.0098	15.9975	16.1493	17.8943	14.4109	16.2441	14.9041	16.9554	16.8105	18.4675	17.4127	19.0323	14.7763	16.3743	16.1893	17.8861	16.3406	17.7025	14.4023
2006-08-19	17.0888	19.0497	15.5043	17.2979	13.7322	15.8106	15.3849	17.291	18.0825	19.9962	17.0729	19.7641	9.95756	12.0304	13.6436	14.5579	13.7459	13.8889	15.8905	16.7602	17.1674	18.6117	10.2763	11.9424	12.4434	14.5353	16.3505	18.9379	15.9756	17.4662	15.0841	16.0625	16.2249	18.0288	14.4274	16.3018	14.9897	16.9286	16.8302	18.5017	17.4328	19.0706	14.7744	16.3084	16.2374	17.7415	16.346	17.633	14.3972
2006-08-20	17.0819	19.2302	15.4915	17.5163	13.7173	15.9591	15.3824	17.5259	18.0217	17.6504	17.0627	19.9492	9.94196	11.8534	13.6224	14.6397	13.7353	13.928	15.8622	16.8643	17.1284	18.7554	10.2583	12.0157	12.4162	14.6417	16.3141	19.0768	15.9424	17.5911	15.0529	16.1767	16.1887	18.1632	14.2445	16.3926	14.9235	17.1162	16.6738	18.5857	17.2841	19.1543	14.7359	16.3615	16.1926	17.7281	16.3106	17.6606	14.3832
2006-08-21	16.7684	18.8496	15.1105	17.2272	13.3472	15.5429	15.0795	17.1904	17.9559	20.0302	16.6638	19.4182	9.69312	11.607	13.4735	14.6694	13.7511	14.0099	15.8211	16.9434	17.0318	18.7924	9.92075	11.8262	12.0641	14.4221	15.9354	18.8002	15.7719	17.5768	15.0154	16.2509	16.0068	18.0705	13.9786	16.2519	14.6592	17.0997	16.42	18.5291	17.0445	19.0821	14.5901	16.3246	16.1067	17.8372	16.1866	17.663	14.3226
2006-08-22	16.6002	18.1126	14.9782	16.533	13.2195	14.7572	14.8785	16.4666	17.8267	15.5545	16.4528	18.3827	9.64056	11.0178	13.3369	14.3776	13.6461	13.9693	15.5712	16.6634	16.7003	18.3209	9.88551	11.2743	11.9439	13.7267	15.7366	17.9378	15.5258	17.0895	14.7357	15.934	15.7331	17.4732	13.9435	15.7372	14.6277	16.4993	16.3542	18.0947	16.983	18.6486	14.5149	15.9022	15.9378	17.6951	16.1061	17.3744	14.3029
2006-08-23	16.9728	17.5973	15.4047	16.0283	13.6448	14.2619	15.2441	15.9093	18.1884	18.8035	16.9321	20.5174	9.8779	11.0004	13.5262	14.0796	13.6831	13.8191	15.7283	16.2725	16.9454	17.784	10.186	11.0263	12.3	13.3538	16.1556	17.4431	15.79	16.6309	14.9052	15.5045	16.023	16.9789	14.1697	15.1791	14.7944	15.7657	16.551	17.5656	17.1692	18.1366	14.7539	15.389	16.0331	17.0657	16.3013	16.9184	14.4034
2006-08-24	17.4135	17.4916	15.8531	15.922	14.1012	14.1538	15.6992	15.7994	18.6187	18.7004	17.5017	20.4045	10.1466	10.7236	13.7258	14.1224	13.7215	13.8343	15.9041	16.3217	17.2227	17.8563	10.5119	11.0797	12.6945	13.4256	16.6269	17.5342	16.0827	16.6979	15.0972	15.5589	16.3533	17.0546	14.591	14.882	15.121	15.5388	16.9243	17.2533	17.5269	17.8392	15.0375	15.204	16.3886	16.6861	16.5612	16.7267	14.4948
2006-08-25	17.3915	17.6121	15.804	16.051	14.0216	14.3126	15.7143	15.8984	18.598	18.8169	17.4549	20.5821	11.9807	10.7301	13.7974	14.14	13.8129	13.8352	16.0789	16.3364	17.433	17.8826	10.4324	11.117	12.6628	13.4711	16.6335	17.5895	16.2117	16.7269	15.2913	15.5756	16.4831	17.0904	14.5995	15.0024	15.2922	15.8116	17.0049	17.3194	17.5998	17.9065	15.0985	15.1774	16.5803	16.6529	16.635	16.7026	14.5084
2006-08-26	17.1511	17.9198	15.5661	16.3472	13.7918	14.6351	15.4527	16.2074	17.0066	19.0964	17.1515	18.1729	11.8512	11.0296	13.605	14.176	13.7448	13.809	15.8683	16.3413	17.1278	17.9256	10.1994	11.276	12.3577	13.6544	16.2536	17.8078	15.9246	16.7988	15.0607	15.5848	16.1684	17.1982	14.4516	15.2381	15.1532	15.9891	16.8446	17.5479	17.4484	18.1269	14.9341	15.2912	16.4943	16.6647	16.5022	16.7834	14.4468
2006-08-27	17.1876	18.3024	15.6131	16.6821	13.8439	15.0549	15.4817	16.5635	18.4022	19.4964	17.2063	21.4249	11.349	11.3089	13.5996	14.3053	13.7103	13.8102	15.8111	16.4611	17.0647	18.1506	10.2722	11.5792	12.4147	14.0386	16.2996	18.2921	15.9007	17.0383	14.9959	15.7254	16.1447	17.515	14.5387	15.4979	15.1293	16.1203	16.9043	17.7694	17.5059	18.3455	14.9699	15.5587	16.3388	16.8677	16.5051	16.9973	14.4727
2006-08-28	16.8322	18.643	15.1601	17.0059	13.3961	15.3761	15.1552	16.9332	18.0086	19.8307	16.7442	21.2627	11.2321	11.5682	13.4683	14.4982	13.7691	13.8733	15.8549	16.6904	17.0713	18.5001	9.87161	11.8465	12.0283	14.4048	15.9101	18.7675	15.7844	17.3611	15.0554	15.983	16.0249	17.8984	14.1986	15.6819	14.9707	16.4065	16.6514	17.9624	17.2648	18.5311	14.8372	15.8023	16.4273	17.1587	16.4199	17.2079	14.4093
2006-08-29	16.3851	18.7617	14.7115	17.091	12.9706	15.5093	14.6661	17.0329	17.5868	19.9498	16.184	20.5695	10.8045	11.4356	13.2336	14.6194	13.626	13.9606	15.4901	16.8617	16.5748	18.7048	9.72451	11.8605	11.7565	14.4487	15.5189	18.8283	15.3877	17.5191	14.6493	16.1652	15.5848	18.0337	13.6146	15.8361	14.1799	16.5545	16.066	18.0693	16.7167	18.642	14.3465	15.859	15.9853	17.3424	15.975	17.2794	14.2091
2006-08-30	16.8149	18.6448	15.2528	17.0433	13.5007	15.3269	15.0679	16.9908	18.0138	19.7495	16.7342	19.0991	10.4552	11.0643	13.493	14.4988	13.6405	13.9756	15.6459	16.7654	16.8455	18.5031	10.2223	11.531	12.3131	14.0404	16.1497	18.3197	15.7286	17.2898	14.8134	16.0497	15.9601	17.7212	13.9672	15.6288	14.5596	16.4098	16.3052	17.9709	16.9387	18.5313	14.4919	15.7392	15.6877	17.2954	16.0556	17.1942	14.3175
2006-08-31	17.1497	17.761	15.5554	16.1638	13.7775	14.366	15.4589	16.122	18.3529	18.9565	17.1474	17.9193	10.9124	10.5861	13.7756	14.17	13.7654	13.9351	15.9957	16.4777	17.3379	18.0194	10.3281	10.789	12.5258	13.1526	16.4626	17.2586	16.0824	16.7168	15.1983	15.7286	16.4369	17.1029	14.1529	14.867	14.8864	15.5979	16.5542	17.2962	17.1746	17.8782	14.6357	15.28	16.0978	17.0505	16.221	16.8388	14.346
2006-09-01	17.2422	17.6243	15.6805	16.0597	13.9237	14.367	15.5228	15.8755	18.4407	18.8189	17.279	17.8057	11.1765	10.6947	13.8232	13.9186	13.7575	13.7042	16.0154	16.0282	17.3843	17.4756	10.5079	10.9036	12.6771	13.1317	16.5975	17.1317	16.0376	16.2546	15.2198	15.2387	16.5192	16.7464	14.4179	14.8951	15.2858	15.6617	16.7511	17.1828	17.3628	17.7786	14.6585	15.2083	16.062	16.5455	16.2337	16.7063	14.3601
2006-09-02	17.7836	18.137	16.212	16.5549	14.5217	14.847	16.0451	16.4381	18.9677	19.3308	18.0113	18.8779	11.2059	10.9175	13.971	14.2677	13.7241	13.8647	16.0906	16.4692	17.5666	18.0926	11.0524	11.3236	13.3417	13.7368	17.4038	17.9213	16.4773	16.9343	15.3079	15.7241	16.84	17.3361	14.9437	15.1056	15.6459	15.7714	17.2271	17.4395	17.8216	18.0209	15.051	15.3327	16.2444	16.7839	16.5471	16.8322	14.508
2006-09-03	18.1099	18.2681	16.5326	16.6677	14.8041	14.9992	16.4241	16.5526	19.242	19.4612	18.4067	21.4937	10.8156	11.1178	14.2549	14.264	13.9141	13.8002	16.5098	16.4147	18.1051	18.0763	11.1536	11.5114	13.5544	13.9483	17.7137	18.1758	16.8997	16.967	15.7649	15.6727	17.2652	17.4274	15.1836	15.2952	15.9522	16.0124	17.4998	17.5712	18.0806	18.1537	15.3018	15.4128	16.7409	16.8294	16.8037	16.8943	14.5749
2006-09-04	17.9779	18.3086	16.4059	16.7211	14.6679	15.0057	16.2897	16.6281	19.0507	19.4995	18.2321	21.5169	10.604	11.0925	14.0707	14.4908	13.8232	13.9571	16.2703	16.7418	17.7746	18.483	10.9949	11.5668	13.3183	14.0767	17.4017	18.3603	16.6157	17.2838	15.5015	16.0252	16.9581	17.7255	15.1141	15.3869	15.7878	15.957	17.4544	17.699	18.0348	18.2727	15.3203	15.3655	16.7923	16.9047	16.8251	16.8752	14.5795
2006-09-05	17.8805	18.0782	16.3114	16.5027	14.5664	14.7674	16.1912	16.3953	17.2969	19.2734	18.1033	21.208	10.6205	10.8667	14.089	14.2952	13.8325	13.8967	16.2943	16.5224	17.8076	18.1508	11.0101	11.2937	13.3411	13.7145	17.432	17.9017	16.6439	16.9697	15.5279	15.781	16.9884	17.3617	14.9543	15.0604	15.5093	15.5423	17.3101	17.4397	17.8954	18.0177	15.1773	15.1792	16.7481	16.7432	16.7178	16.7184	14.5287
2006-09-06	17.6641	17.9635	16.0901	16.3917	14.3158	14.6597	15.9889	16.2696	18.6177	19.1607	17.8091	19.6755	10.4856	10.7288	14.0434	14.1904	13.8618	13.8652	16.2976	16.4073	17.777	17.9763	10.8304	11.1458	13.1457	13.5204	17.2114	17.6577	16.573	16.8032	15.5303	15.6531	16.8906	17.1698	14.7775	14.7635	15.3642	15.2908	17.1464	17.135	17.7381	17.7268	15.1711	14.9646	16.5772	16.5178	16.6858	16.5282	14.5358
2006-09-07	17.3925	17.9937	15.8163	16.4197	14.0416	14.6986	15.7033	16.2936	14.9143	19.1907	17.461	21.1067	10.3842	10.6934	13.841	14.1346	13.8138	13.8448	16.1049	16.3425	17.4799	17.8815	10.5212	11.0777	12.7628	13.4284	16.7475	17.5407	16.271	16.7159	15.319	15.5814	16.5503	17.0715	14.4686	14.8751	14.9688	15.461	16.8745	17.1937	17.478	17.7865	14.91	14.8888	16.5811	16.3383	16.4964	16.4458	14.429
2006-09-08	17.2083	18.0898	15.6195	16.5095	13.8418	14.8022	15.5179	16.3868	18.2803	19.2851	17.2228	21.2419	10.0463	10.844	13.7025	14.1315	13.7594	13.8163	15.9438	16.3106	17.2494	17.8586	10.3659	11.1519	12.5524	13.5046	16.4808	17.6252	16.0605	16.7181	15.1421	15.5482	16.3191	17.0902	14.2477	15.2338	14.8064	15.9068	16.644	17.5046	17.2594	18.09	14.6664	15.0261	16.1451	16.387	16.251	16.5528	14.3556
2006-09-09	16.9846	17.9991	15.3751	16.4261	13.6003	14.6722	15.2903	16.3257	17.3501	19.1961	16.9369	21.0953	10.0044	10.6541	13.6686	14.182	13.7499	13.897	15.9103	16.4369	17.1992	17.9912	10.3185	11.0391	12.4931	13.4095	16.4088	17.5354	16.0107	16.7858	15.1055	15.684	16.264	17.1334	14.2483	15.0815	14.9396	15.7673	16.628	17.4649	17.2445	18.0416	14.4481	15.0756	15.98	16.5587	16.058	16.6152	14.2651
2006-09-10	17.2519	17.6831	15.6988	16.1122	13.9604	14.3436	15.5139	16.0027	17.6665	18.8876	17.3022	20.6852	10.2903	10.4305	13.7611	13.9799	13.6958	13.8308	15.8962	16.2151	17.2403	17.6628	10.6577	10.7743	12.8506	13.0626	16.8009	17.1017	16.1353	16.4746	15.0892	15.4396	16.4262	16.7836	14.5239	14.5863	15.2739	15.2679	16.8577	16.991	17.4645	17.5887	14.5147	14.9071	15.8292	16.4667	16.092	16.4781	14.3147
2006-09-11	17.5907	17.5474	16.0216	15.9812	14.2549	14.2195	15.9027	15.8514	18.3798	18.7545	17.7196	20.5152	10.4621	10.4177	14.0166	13.927	13.8333	13.7797	16.2431	16.1148	17.7116	17.5407	10.8476	10.7955	13.1494	13.0586	17.2045	17.0774	16.5301	16.3916	15.4705	15.3296	16.8493	16.7028	14.5188	14.5838	15.3079	15.2542	16.9078	16.9264	17.5101	17.5295	14.7394	14.8777	16.0894	16.2882	16.2987	16.4302	14.3927
2006-09-12	17.1412	17.7313	15.5118	16.1668	13.7291	14.4428	15.4727	16.0141	18.1342	18.9335	17.1321	20.7731	10.0328	10.6482	13.7977	14.0348	13.8516	13.7837	16.1423	16.2003	17.5023	17.6946	10.3404	11.0256	12.5893	13.3357	16.5728	17.4111	16.234	16.565	15.3638	15.4259	16.5064	16.9155	14.0083	14.9815	14.6622	15.6954	16.4553	17.2694	17.082	17.8618	14.5843	15.0689	16.1645	16.4142	16.1892	16.5875	14.3126
2006-09-13	16.6402	18.0945	14.9917	16.5073	13.2333	14.8243	14.935	16.375	17.775	19.274	16.5027	18.4139	9.57853	10.7762	13.3408	14.1765	13.7079	13.8437	15.6887	16.3741	16.8397	17.942	9.75507	11.1757	11.8561	13.5463	15.6826	17.6831	15.5845	16.7857	14.8721	15.6176	15.8059	17.1597	13.5667	15.2685	14.1579	16.0125	16.0047	17.5653	16.6581	18.1456	14.3296	15.3792	15.8109	16.6764	15.9422	16.8446	14.2221
2006-09-14	16.2204	17.7351	14.4708	16.1278	12.7628	14.3259	14.51	16.1032	17.4617	15.0084	15.9859	17.8833	9.26075	11.0969	13.0336	14.0431	13.6233	13.932	15.4226	16.3989	16.449	17.8774	9.34457	10.6523	11.3673	12.9887	15.1072	17.0641	15.1789	16.5946	14.5889	15.6438	15.3813	16.9009	13.1456	14.663	13.7778	15.4553	15.6017	17.1206	16.2832	17.711	13.853	15.2231	15.4236	16.9112	15.4947	16.7762	13.9935
2006-09-15	15.7775	16.7395	13.9675	15.0677	12.3111	13.3083	14.0383	15.0536	17.0434	17.9788	15.4419	19.4764	9.10872	10.3622	12.8508	13.4542	13.5542	13.7472	15.227	15.8064	16.1712	17.0093	9.14038	9.8915	11.1018	12.0304	14.7783	15.8965	14.9182	15.7469	14.3767	14.9999	15.1032	15.9805	12.8002	13.904	13.3958	14.5796	15.2495	16.3459	15.9552	16.9787	13.6544	14.7279	14.9515	16.3845	15.2801	16.33	13.9467
2006-09-16	15.3094	16.2251	13.3569	14.4994	11.8061	12.7824	13.5507	14.5081	16.6096	17.4831	14.8873	17.5422	8.96242	9.58138	12.606	13.1266	13.5085	13.6425	15.0923	15.4873	15.9694	16.5465	8.78355	9.48109	10.7243	11.5202	14.3681	15.2801	14.6583	15.2914	14.2456	14.6557	14.8585	15.4952	12.5553	13.512	13.2255	14.0112	15.0019	15.9509	15.7258	16.6079	13.4452	14.1892	14.825	15.7924	15.0774	15.8225	13.8244
2006-09-17	14.8971	16.4217	12.875	14.8126	11.3939	13.0617	13.1071	14.6769	16.2163	17.6568	14.3901	16.2296	8.6878	9.74762	12.2735	13.1551	13.3993	13.5908	14.806	15.3927	15.5644	16.4381	8.39306	9.64724	10.2606	11.6468	13.8221	15.3767	14.244	15.267	13.945	14.5422	14.4415	15.4531	12.2517	13.479	12.8793	13.9226	14.7023	15.8926	15.4506	16.5511	13.0576	14.1209	14.3847	15.4236	14.6779	15.7277	13.622
2006-09-18	15.2577	16.7256	13.4599	15.1024	11.8283	13.338	13.4634	15.016	16.5324	17.9571	14.7902	16.6152	8.92783	9.79971	12.5111	13.3064	13.4041	13.6663	14.8124	15.595	15.5898	16.7187	8.80429	9.77865	10.6293	11.846	14.1687	15.6427	14.4022	15.5063	13.9218	14.7656	14.5425	15.7154	12.6119	13.4113	13.1161	13.8665	15.0112	15.8407	15.7272	16.5043	13.3208	14.1386	14.3515	15.5444	14.9327	15.7551	13.8313
2006-09-19	15.4913	16.6651	13.6259	15.0306	12.0146	13.2695	13.7351	14.9557	16.7745	13.9247	15.0951	16.5339	8.90989	9.68519	12.5639	13.3101	13.4968	13.6587	15.0615	15.5821	15.9252	16.7045	8.72993	9.80306	10.6639	11.8656	14.2995	15.6588	14.6094	15.5038	14.214	14.7503	14.8107	15.7113	12.5203	13.3918	13.1195	13.8719	14.9767	15.8084	15.7044	16.4731	13.4549	14.1429	14.7526	15.5047	15.0826	15.7546	13.8433
2006-09-20	14.9837	16.8113	12.9287	15.2223	11.4636	13.4579	13.2075	15.088	15.2813	18.038	14.5066	16.8707	8.66816	9.85355	12.2738	13.4053	13.3944	13.6635	14.7898	15.6337	15.5421	16.7943	8.40155	9.98363	10.2608	12.0632	13.8152	15.879	14.2317	15.6223	13.9253	14.8033	14.4235	15.838	12.004	13.616	12.669	14.137	14.4608	16.0072	15.2307	16.6583	13.1848	14.3272	14.5213	15.6232	14.8101	15.9185	13.69
2006-09-21	14.6781	16.7717	12.6313	15.1246	11.1805	13.3597	12.8692	15.0782	13.6408	18.0063	14.1234	16.7528	8.54059	9.80525	12.2087	13.3942	13.3602	13.7171	14.6941	15.7257	15.4085	16.8974	8.34614	9.83955	10.1711	11.9513	13.6924	15.7907	14.1208	15.6516	13.8184	14.9108	14.2985	15.8759	11.8627	13.5316	12.4291	13.9293	14.2908	15.9672	15.0687	16.6229	13.068	14.2512	14.2545	15.746	14.6847	15.8703	13.6639
2006-09-22	15.1816	16.335	13.3713	14.621	11.7503	12.894	13.3824	14.6251	16.4638	17.5884	14.6975	16.2809	8.75145	9.37936	12.435	13.0805	13.4029	13.6418	14.8021	15.4749	15.5679	16.523	8.66816	9.39536	10.501	11.4348	14.0425	15.1918	14.3416	15.2472	13.9186	14.6459	14.4947	15.4547	12.2399	13.1278	12.7609	13.5795	14.6484	15.5832	15.393	16.2661	13.1963	13.9994	14.3443	15.4542	14.8143	15.6274	13.743
2006-09-23	15.8982	16.1506	14.2062	14.4493	12.4959	12.7282	14.1385	14.4186	17.1484	17.4071	15.5758	16.5671	9.13552	9.30018	12.8027	12.9508	13.498	13.5652	15.088	15.2729	15.9865	16.2456	9.16237	9.30599	11.0692	11.2743	14.6966	14.9631	14.7962	15.024	14.217	14.4204	14.9559	15.2044	12.5758	13.0928	13.1363	13.4891	14.9965	15.5122	15.7169	16.1958	13.2312	13.8769	14.4667	15.2389	14.8537	15.5015	13.7421
2006-09-24	16.0146	16.4758	14.2557	14.8666	12.563	13.1132	14.2863	14.7359	14.2781	17.7134	15.7298	17.8075	9.06939	9.61456	12.8322	13.2026	13.5686	13.5829	15.2601	15.399	16.2121	16.4601	9.0788	9.7606	11.0584	11.7616	14.749	15.4973	14.9262	15.3172	14.4184	14.5461	15.1236	15.5051	12.6787	13.3593	13.2975	13.8539	15.1106	15.7608	15.8242	16.4272	13.4258	13.9368	14.576	15.2403	15.0445	15.5536	13.8602
2006-09-25	15.6652	16.8842	13.8216	15.2954	12.1884	13.5284	13.9221	15.167	16.6982	18.1087	15.3079	16.8428	8.83711	9.81703	12.5566	13.4914	13.4833	13.6921	15.023	15.7242	15.8727	16.9264	8.74056	10.0921	10.6571	12.2024	14.2773	16.0505	14.5769	15.7488	14.1685	14.902	14.7678	15.9764	12.486	13.651	13.1293	14.3899	14.9366	16.0438	15.666	16.6926	13.3613	14.0325	14.6971	15.3634	14.9905	15.6472	13.7873
2006-09-26	15.6847	16.6914	13.9262	15.0171	12.2521	13.2606	13.9235	15.0019	16.5568	17.9215	15.3173	16.5678	8.87514	9.56609	12.5805	13.3439	13.4539	13.7294	14.9447	15.7339	15.7707	16.8959	8.83652	9.71575	10.7113	11.8347	14.2973	15.6762	14.5388	15.6116	14.0716	14.9249	14.7009	15.8409	12.5663	13.4666	13.1916	14.171	14.9882	15.9121	15.7092	16.5722	13.1812	13.8006	14.4434	15.2764	14.8037	15.4365	13.708
2006-09-27	15.604	16.1941	13.7425	14.4612	12.1222	12.7484	13.8584	14.4762	12.938	17.3991	15.235	15.9507	8.78972	9.23626	12.5238	12.9699	13.477	13.599	15.0066	15.3538	15.8486	16.3513	8.69411	9.27382	10.6091	11.2749	14.2261	14.9924	14.5443	15.0876	14.1531	14.5142	14.7386	15.2837	12.1935	13.0562	12.8708	13.7647	14.6584	15.5086	15.4131	16.1964	13.1315	13.5439	14.3328	14.8948	14.7504	15.1745	13.6944
2006-09-28	14.9285	15.5676	12.8391	13.6496	11.4008	12.0626	13.1515	13.8293	14.2462	15.3905	14.447	15.2017	8.39442	10.12	11.9667	12.5747	13.3214	13.51	14.6513	15.0994	15.3495	15.9772	8.00769	8.7264	9.86792	10.6769	13.4047	14.3273	13.9581	14.6439	13.8024	14.2583	14.1993	14.8547	11.2244	12.1908	12.0093	12.8739	13.6771	14.6741	14.5193	15.432	12.8978	12.999	14.1611	14.4133	14.5089	14.6179	13.5464
2006-09-29	14.179	14.8584	11.8997	12.7829	10.6507	11.3397	12.3476	13.0722	15.5637	16.1464	13.5739	14.3559	7.86744	9.09225	11.3048	12.0432	13.0765	13.3364	14.113	14.6671	14.6121	15.37	7.30799	8.10831	9.05222	9.95784	12.4488	13.4901	13.1974	14.0091	13.2494	13.8099	13.4691	14.2297	10.4734	11.2077	11.0688	11.8678	12.8687	13.6514	13.7758	14.4942	12.4504	12.452	13.6459	13.6376	14.0265	14.0285	13.2859
2006-09-30	13.9138	14.3251	11.6456	12.1143	10.4061	10.803	12.0534	12.5009	14.3803	15.492	13.2356	13.73	7.75778	8.86272	11.2064	11.6248	13.0169	13.1859	13.9057	14.3155	14.3163	14.8834	7.2278	7.65367	8.88458	9.42176	12.2011	12.859	12.9698	13.5118	13.0098	13.4452	13.1913	13.7432	10.5596	11.3086	11.0918	11.9067	12.9307	13.7001	13.8208	14.5225	12.3402	12.4713	13.3258	13.435	13.9093	14.052	13.2792
2006-10-01	14.2713	14.2087	12.1879	12.0455	10.7884	10.7068	12.4254	12.3666	15.6254	11.5996	15.9321	13.5707	7.98906	8.08368	11.5446	11.4817	13.1257	13.1224	14.1112	14.1456	14.5938	14.6461	7.60658	7.51431	9.28537	9.22798	12.6418	12.6101	13.2996	13.3	13.2071	13.2595	13.4778	13.5153	10.9326	11.2928	11.4454	11.9153	13.3214	13.7133	14.1772	14.5428	12.5481	12.723	13.5209	13.7435	14.1345	14.3207	13.4144
2006-10-02	14.273	14.4737	12.054	12.4165	10.7524	10.9859	12.4443	12.6451	15.6478	11.8422	16.482	13.8713	7.94397	9.01054	11.4366	11.5308	13.12	13.1353	14.1815	14.1631	14.7013	14.6687	7.45054	7.57279	9.19605	9.28304	12.6023	12.6654	13.3124	13.3373	13.3114	13.2731	13.5604	13.5414	11.0257	11.3003	11.5773	11.8753	13.4314	13.7093	14.2824	14.5352	12.6799	12.669	13.7531	13.827	14.2757	14.2645	13.4669
2006-10-03	14.2261	14.7348	12.0787	12.7289	10.7274	11.2477	12.3839	12.9256	14.9565	15.2653	13.5879	14.1835	7.88846	9.28983	11.3593	11.6371	13.0742	13.1707	14.0307	14.2383	14.4873	14.7719	7.38796	7.69172	9.07173	9.41497	12.4208	12.8149	13.1456	13.4513	13.1383	13.3483	13.36	13.6468	11.1706	11.3957	11.7527	11.971	13.5726	13.8105	14.4088	14.6277	12.6596	12.6115	13.7697	13.6867	14.2544	14.2027	13.4442
2006-10-04	14.1204	14.8586	11.8684	12.8711	10.6023	11.3703	12.2798	13.0594	15.4889	12.48	13.4878	14.3334	7.78132	9.00843	11.1781	11.7164	13.021	13.2001	13.9703	14.3095	14.4137	14.8707	7.18452	7.77679	8.88502	9.51796	12.2365	12.938	13.0173	13.5496	13.0947	13.4231	13.2786	13.7449	10.7875	11.4431	11.3812	12.0256	13.2033	13.8615	14.081	14.6752	12.6146	12.7108	13.7058	13.7667	14.2061	14.3084	13.4218
2006-10-05	13.8486	14.8945	11.5282	12.9083	10.3345	11.4044	11.9872	13.0988	15.0045	12.2429	13.1713	14.3778	9.03817	8.8352	11.154	11.9677	12.9985	13.2657	13.8713	14.4427	14.2703	15.0558	7.17199	8.09	8.82427	9.84052	12.1336	13.2837	12.9174	13.7889	12.9763	13.5476	13.1452	13.9509	10.7362	11.4955	11.2862	12.0321	13.1223	13.9159	13.9978	14.7244	12.5591	12.685	13.6446	13.8157	14.1464	14.2816	13.3888
2006-10-06	13.7142	14.6639	11.3749	12.5604	10.2057	11.1491	11.8408	12.8613	12.2624	12.0345	13.0103	14.121	8.79584	8.2051	10.9359	11.7961	12.9284	13.2526	13.7975	14.4773	14.1834	15.1074	6.93928	7.8322	8.61254	9.64285	11.9248	13.1269	12.7673	13.7296	12.9236	13.6161	13.054	13.963	10.7259	11.1043	11.3196	11.7002	13.1196	13.5344	13.9984	14.3827	12.3192	12.4072	13.4228	13.5471	13.8837	13.9801	13.2282
2006-10-07	13.176	14.2999	10.5675	12.101	9.67186	10.7825	11.2734	12.4717	14.5272	11.6945	12.4399	13.6951	7.58829	7.93364	10.3235	11.4558	12.6766	13.1208	13.384	14.1635	13.6467	14.6737	6.35617	7.47771	7.97813	9.2081	11.2036	12.6028	12.1744	13.3044	12.524	13.2859	12.5462	13.5372	10.0087	10.5493	10.6004	11.2386	12.3828	12.9495	13.3367	13.8485	11.7327	12.2158	12.7809	13.225	13.2171	13.7715	12.8337
2006-10-08	12.6318	13.8754	9.92934	11.5282	9.16461	10.3543	10.6815	12.0197	14.0881	11.3043	11.8036	13.2136	7.16072	7.73831	9.91946	11.1906	12.494	13.0242	13.0091	13.9706	13.142	14.413	5.98435	7.19855	7.5155	8.89573	10.6357	12.2452	11.689	13.0224	12.1338	13.093	12.0717	13.2787	9.22502	10.0656	9.74898	10.655	11.5288	12.4312	12.5536	13.3749	11.2894	12.0142	12.0814	13.0055	12.7128	13.5458	12.5978
2006-10-09	12.0668	13.6882	9.16181	11.3525	8.65445	10.1822	10.0784	11.8116	13.6109	11.1197	11.1999	12.9766	7.2543	7.74178	9.53597	11.2076	12.3137	13.0171	12.7429	13.9053	12.8061	14.3156	5.65505	7.22925	7.1544	8.88548	10.2173	12.2016	11.3275	12.9699	11.8789	13.0091	11.7701	13.1908	8.88984	10.0861	9.43266	10.6171	11.1421	12.4349	12.1955	13.3703	11.0455	11.821	11.7234	12.7332	12.429	13.3291	12.4536
2006-10-10	12.2808	13.7283	9.62202	11.4101	8.84047	10.2229	10.2893	11.8541	13.6802	11.156	11.3488	13.0208	7.18645	8.56465	9.59132	11.085	12.3429	12.9838	12.6837	13.8894	12.701	14.3035	5.68391	7.09091	7.12955	8.77272	10.1543	12.1023	11.2751	12.9073	11.7909	13.0109	11.6571	13.1716	9.48887	10.2021	9.97553	10.7165	11.7728	12.5643	12.7584	13.4896	11.2644	11.8531	11.8291	12.684	12.7042	13.3703	12.6693
2006-10-11	12.969	13.6407	10.4925	11.2631	9.4919	10.1305	11.0317	11.7637	14.4105	11.0806	12.1315	12.9318	7.90278	9.09381	10.1459	10.9653	12.5879	12.9319	13.0328	13.7597	13.1389	14.1237	6.17964	6.97413	7.65331	8.61754	10.7441	11.9069	11.7722	12.7422	12.1172	12.8711	12.0562	12.999	9.66169	10.2008	10.1854	10.7514	11.9924	12.5632	12.97	13.4903	11.6875	11.8205	12.3758	12.7118	13.1887	13.3298	12.9337
2006-10-12	12.9722	12.8882	10.3627	10.1593	9.48292	9.40165	11.0483	10.9673	14.4485	10.4159	12.2783	12.1334	7.22245	9.11442	10.072	10.3886	12.5634	12.706	13.1456	13.4534	13.3246	13.7421	6.12337	6.4174	7.68577	8.05934	10.8433	11.3061	11.8667	12.2621	12.2746	12.5983	12.2425	12.6368	9.34509	9.31179	9.90964	9.87173	11.6515	11.6285	12.6626	12.6512	11.7006	11.2517	12.5773	12.1662	13.1921	12.6539	12.8745
2006-10-13	12.3984	12.6275	9.58582	10.007	8.95158	9.16298	10.4347	10.6686	11.1129	10.1398	11.5644	11.7634	6.94518	6.99748	9.62113	10.0071	12.3544	12.5335	12.8132	13.0615	12.8978	13.2066	5.72886	6.06117	7.24175	7.59499	10.3227	10.7243	11.4191	11.7642	11.9496	12.1817	11.8538	12.1296	9.1337	9.16684	9.64901	9.68924	11.4134	11.4355	12.4423	12.4584	11.585	11.2675	12.4001	11.8447	13.0618	12.7068	12.8125
2006-10-14	11.2087	12.4475	8.03027	9.67195	7.94732	8.99515	9.16975	10.4851	8.96855	10.001	10.3156	11.6077	6.93199	6.73302	8.46552	9.66234	11.7372	12.3742	12.0456	12.8368	11.9778	12.9258	4.8449	5.76281	6.29983	7.27604	9.22517	10.3607	10.4211	11.4523	11.2437	11.9705	11.0907	11.8778	8.09496	9.06384	8.74051	9.64603	10.2849	11.3368	11.4178	12.3738	11.1553	11.1997	11.9801	11.9449	12.5465	12.6093	12.4791
2006-10-15	11.3835	12.9129	8.52711	10.4835	8.01919	9.44586	9.31841	10.965	12.8399	10.3865	10.328	12.0445	7.01985	7.8929	8.53143	10.1291	11.8214	12.5792	11.8205	12.997	11.5859	13.087	4.78884	6.16325	6.07643	7.62143	8.88249	10.6982	10.1596	11.7318	10.9299	12.0755	10.6524	12.0063	8.47288	9.33336	8.87442	9.87154	10.6745	11.6183	11.7509	12.6223	11.0902	11.161	11.6718	11.7965	12.494	12.574	12.5287
2006-10-16	11.8457	13.7648	8.95802	11.5449	8.44871	10.2783	9.83239	11.8834	9.4498	11.2092	10.9171	13.0349	7.19198	7.57778	8.81489	10.8202	11.9603	12.8594	12.1086	13.5375	11.9736	13.8096	5.03741	6.84003	6.40117	8.40056	9.29297	11.6108	10.5184	12.4816	11.2331	12.621	11.0113	12.7003	8.67196	10.0964	9.12804	10.6248	10.9166	12.4285	11.9868	13.3564	11.2874	11.6873	11.9191	12.2818	12.7256	13.1933	12.6595
2006-10-17	11.9254	13.9128	9.08545	11.6118	8.51712	10.3981	9.91511	12.0559	11.4986	11.333	10.9913	13.2448	7.431	8.32084	9.05203	11.1317	12.0825	12.9896	12.2722	13.8506	12.1742	14.2419	5.22558	7.14939	6.60601	8.79645	9.53265	12.0999	10.7329	12.8898	11.3868	12.9546	11.1832	13.1176	8.65882	10.4801	9.26111	11.0596	10.8928	12.8571	11.9633	13.7551	11.248	11.8868	11.9753	12.7787	12.6695	13.4057	12.5886
2006-10-18	11.7842	13.6272	8.84826	11.2268	8.39884	10.1142	9.76987	11.7511	9.39432	11.0715	10.8667	12.9229	6.82006	9.52504	8.64313	10.944	11.854	12.9309	12.0872	13.7978	11.9886	14.1828	4.93988	6.94774	6.35306	8.61879	9.26585	11.9298	10.4779	12.7704	11.2494	12.9225	11.0607	13.0537	8.48496	9.9659	9.07591	10.5498	10.702	12.3325	11.7921	13.2889	11.1025	11.666	11.7799	12.5708	12.4987	13.1499	12.4978
2006-10-19	11.4733	13.5462	8.46622	11.1759	8.12739	10.0438	9.43542	11.6585	9.1501	11.7701	10.5232	12.8117	5.97834	9.00223	8.45871	10.7931	11.7699	12.8645	11.8499	13.6312	11.6556	13.952	4.76208	6.80193	6.09489	8.42297	8.9282	11.6819	10.1877	12.5598	10.9874	12.7426	10.7416	12.8326	8.21296	9.70701	8.81806	10.2395	10.4023	12.0359	11.5163	13.0093	10.7607	11.7863	11.4091	12.5402	12.0801	13.2981	12.2361
2006-10-20	11.2275	12.8721	8.1716	10.1323	7.91526	9.38675	9.17068	10.9505	8.88974	10.4059	10.25	12.1182	5.91794	9.05942	8.33798	10.024	11.7	12.542	11.7788	13.2171	11.5765	13.4451	4.67837	6.09514	6.01185	7.71521	8.83327	10.9154	10.097	11.9303	10.9266	12.3757	10.683	12.3672	7.9135	9.17004	8.42739	9.70914	10.0737	11.4654	11.2129	12.4964	10.431	11.2996	10.9245	12.2501	11.6857	12.7083	12.0329
2006-10-21	11.4946	12.2856	8.58798	9.50119	8.12788	8.84594	9.4467	10.3072	9.1041	9.89469	10.4921	11.411	6.06686	8.71614	8.65842	9.54144	11.8853	12.3177	11.9372	12.7147	11.7395	12.7604	4.89608	5.65316	6.21013	7.1338	9.04873	10.1823	10.3062	11.2982	11.0496	11.8416	10.7919	11.7227	8.27318	8.48344	8.74984	9.05035	10.4695	10.7066	11.5669	11.8002	10.6048	10.7809	10.9627	11.4187	11.9249	12.1069	12.2362
2006-10-22	11.0706	12.2879	7.90389	9.54524	7.81572	8.84682	9.01532	10.3055	8.81299	10.2482	10.1362	11.3946	5.90562	8.82083	8.25459	9.77355	11.638	12.4266	11.7896	12.7967	11.6226	12.8405	4.64804	5.84144	6.0209	7.29461	8.86267	10.3402	10.1076	11.4342	10.9644	11.8952	10.7537	11.7816	7.4918	8.71855	8.1028	9.24206	9.61056	10.9494	10.7908	12.0089	10.1962	10.8693	10.7488	11.3407	11.3721	12.2374	11.811
2006-10-23	10.8468	12.1522	7.76133	9.3174	7.57698	8.72596	8.75506	10.1652	8.70465	9.74467	9.80016	11.27	5.67732	8.75966	7.93173	9.59864	11.4731	12.3439	11.4523	12.7892	11.1708	12.8649	4.37208	5.70824	5.65488	7.21428	8.39478	10.2879	9.69474	11.389	10.6095	11.9239	10.3397	11.8229	7.42786	8.6268	7.86159	9.15633	9.52661	10.8634	10.6991	11.9409	10.1396	10.9747	10.3729	11.5616	11.3541	12.353	11.9077
2006-10-24	10.6269	11.9799	7.42293	9.12496	7.43432	8.5688	8.53395	9.97699	8.36719	11.8936	9.6226	11.0665	5.41944	8.7251	7.44257	9.57366	11.1695	12.3344	11.1082	12.6876	10.7769	12.7108	4.05046	5.67143	5.31116	7.12518	7.97679	10.155	9.28669	11.2756	10.2996	11.7998	10.0464	11.6688	7.15346	8.43076	7.57484	8.893	9.22071	10.6461	10.423	11.7383	9.98837	10.7307	10.3456	11.3488	11.1356	12.0466	11.714
2006-10-25	10.0917	11.8368	6.81693	8.93245	7.0112	8.44258	7.9637	9.82434	7.89752	11.7618	9.04153	10.9147	5.09844	8.56782	6.91099	9.26299	10.8482	12.1792	10.6419	12.5431	10.2033	12.554	3.67556	5.42826	4.85836	6.9002	7.39983	9.9175	8.74289	11.064	9.84516	11.6858	9.57858	11.5468	6.76208	8.60192	7.16272	9.05753	8.75358	10.8277	9.98719	11.9008	9.5352	10.5509	9.78688	11.0307	10.5535	11.8402	11.3594
2006-10-26	9.52835	11.7415	6.20125	8.82858	6.59651	8.35611	7.37027	9.72015	7.78888	12.9917	8.44372	10.8014	5.95204	8.38052	6.5556	8.97832	10.6336	12.0391	10.308	12.2822	9.78701	12.2094	3.42177	5.18368	4.54119	6.59607	6.98948	9.54086	8.358	10.734	9.51438	11.4177	9.23514	11.2316	6.37439	8.28	6.81723	8.73632	8.30287	10.49	9.56363	11.5984	9.11337	10.4244	9.18672	10.8732	10.0199	11.6844	11.1
2006-10-27	10.1366	11.2882	7.01132	8.19657	6.94591	7.98259	7.97852	9.24296	7.87995	9.39364	8.95431	10.349	5.96185	6.0447	7.17909	8.47058	11.0749	11.7614	10.6925	11.9442	10.167	11.8073	3.75114	4.80419	4.8441	6.19217	7.35934	9.06824	8.77139	10.2995	9.82024	11.1082	9.43576	10.9031	6.96386	7.68126	7.39437	8.08118	8.98578	9.81534	10.1946	10.9766	9.47288	10.2141	9.34094	10.6209	10.5485	11.4211	11.4666
2006-10-28	10.1872	10.5077	6.90321	7.26727	7.1063	7.35255	8.07147	8.41116	7.99323	8.29846	9.16906	9.51121	6.23417	5.49865	6.71794	7.49795	10.6998	11.1834	10.5306	11.2121	10.1067	10.9344	3.59079	4.12382	4.7921	5.43143	7.31714	8.13664	8.63484	9.41721	9.76529	10.4232	9.54977	10.2091	6.76315	6.98445	7.17154	7.39556	8.76644	9.01865	9.9994	10.2361	9.42407	9.71823	9.60647	10.0632	10.4183	10.7798	11.2265
2006-10-29	9.84155	9.9535	6.56769	6.67075	6.78734	6.89712	7.68881	7.81467	7.83461	7.76475	8.73606	8.88352	6.9869	5.23972	6.80699	7.07113	10.8315	10.9625	10.433	10.7413	9.87967	10.3012	3.52321	3.759	4.606	4.93497	7.06627	7.49391	8.47485	8.84885	9.59211	9.92416	9.23663	9.62952	6.672	6.60689	7.09042	6.93312	8.65564	8.57854	9.89206	9.82198	9.30508	9.49828	9.32369	9.59885	10.2928	10.5355	11.2202
2006-10-30	9.73196	9.59179	6.43755	6.27814	6.7159	6.62361	7.57619	7.43164	7.58549	7.44573	8.63104	8.49311	6.92455	4.90594	6.48941	6.48593	10.5723	10.5653	10.2871	10.2934	9.78813	9.80227	3.40945	3.41512	4.54987	4.56252	7.00114	7.01759	8.34884	8.35957	9.5129	9.52357	9.26957	9.28906	6.81705	6.41615	7.18925	6.70568	8.83514	8.35939	10.0586	9.61538	9.39563	9.29222	9.41069	9.39489	10.4156	10.2571	11.284
2006-10-31	9.41011	9.42844	6.08302	6.11627	6.49598	6.47923	7.24176	7.25259	7.28891	9.80698	8.3035	8.29464	6.4931	4.69647	5.84191	6.28132	10.1492	10.4748	9.68399	10.0279	9.06828	9.42729	3.1319	3.20069	4.18771	4.25586	6.52665	6.61734	7.91017	8.01328	8.93411	9.22887	8.72423	8.92669	6.55613	6.28553	6.94251	6.59908	8.54317	8.22867	9.78569	9.48854	9.27911	9.1971	9.36143	9.18451	10.2438	10.1533	10.3439
2006-11-01	8.7729	9.6753	5.43746	6.40842	6.08666	6.63152	6.58556	7.50403	6.75251	9.54482	7.65125	8.52509	6.166	4.95774	5.35152	6.8056	9.83573	10.8391	9.18249	10.4095	8.45655	9.83847	2.7862	3.49785	3.79606	4.56024	5.98882	7.00513	7.33824	8.42727	8.44131	9.56005	8.24922	9.18863	5.81387	6.35051	6.15255	6.74914	7.71182	8.319	8.98906	9.57045	8.7774	9.39494	8.81771	9.35999	9.56463	10.4251	9.75629
2006-11-02	8.9549	10.158	5.64887	6.96093	6.05873	7.00551	6.73295	8.01608	6.84488	7.92577	7.71705	9.04088	6.37504	5.13848	5.84491	7.03485	10.2445	10.9486	9.53269	10.6882	8.76357	10.2241	2.84535	3.71964	3.76229	4.87515	5.97243	7.41534	7.44353	8.78288	8.70415	9.86362	8.32492	9.553	5.87441	6.63428	6.26093	6.94339	7.72581	8.64996	9.01615	9.87965	8.71592	9.42295	8.47285	9.51403	9.54755	10.4363	9.85385
2006-11-03	9.95628	10.4583	6.7697	7.28396	6.81626	7.26373	7.79178	8.34218	7.71159	8.1907	8.78398	9.38974	7.06403	5.13506	6.94343	7.02334	10.9407	10.9392	10.4758	10.6846	9.89154	10.2232	3.57247	3.7157	4.62164	4.87412	7.0768	7.41476	8.51236	8.77988	9.60306	9.86276	9.19949	9.55642	6.88735	6.63686	7.15397	6.94119	8.88557	8.64349	10.102	9.87785	9.30882	9.48381	9.10032	9.52753	10.3454	10.5279	10.1672
2006-11-04	10.9045	10.3145	7.88474	7.0793	7.60909	7.17448	8.80935	8.19734	8.56469	9.42604	9.82804	9.26952	7.33636	5.08762	7.64871	6.93359	11.3323	10.8799	11.1378	10.6179	10.7435	10.1483	4.12248	3.66086	5.31434	4.81494	7.95597	7.34045	9.3104	8.70489	10.2736	9.80297	9.9429	9.50356	7.73914	6.96818	8.09069	7.39196	9.85633	9.00492	11.0054	10.2146	10.0596	9.63385	10.1261	9.72249	11.2786	10.7188	10.8715
2006-11-05	11.1181	9.63443	8.03927	6.30263	7.82265	6.69794	9.05338	7.48871	8.79165	7.52108	10.1304	8.57994	5.74192	4.75042	7.61601	6.29329	11.2869	10.4348	11.207	10.1277	10.8746	9.61164	4.14813	3.29975	5.39983	4.42912	8.0806	6.84173	9.3991	8.18175	10.377	9.36987	10.1004	9.15334	8.25105	6.40014	8.66147	6.80839	10.425	8.34466	11.5313	9.6018	10.1796	9.24953	10.5502	9.44375	11.3825	10.1785	10.8387
2006-11-06	10.5906	8.64279	7.36875	5.3175	7.41351	6.03045	8.49797	6.4591	8.34098	6.67974	9.59461	7.53372	5.34676	4.22143	6.95451	5.44145	10.8602	9.86742	10.7158	9.30749	10.3146	8.64151	3.73061	2.7731	4.94565	3.78249	7.51457	5.9686	8.83675	7.31419	9.93228	8.58541	9.6934	8.43865	7.64521	5.46379	8.18006	5.90407	9.74904	7.23728	10.9219	8.54191	9.87535	8.64627	10.2029	8.63334	10.9922	9.3955	10.8547
2006-11-07	10.7804	8.64583	7.72624	5.32533	7.50565	5.84362	8.67723	6.41028	8.4558	6.56787	9.69706	7.39253	5.34824	4.21831	7.09429	5.56868	11.0056	10.0452	10.6796	9.30611	10.1814	8.5181	3.72451	2.69951	4.84641	3.60432	7.37129	5.75973	8.76312	7.21413	9.83099	8.50373	9.48121	8.17286	7.65689	5.65355	8.08889	5.90822	9.74816	7.48909	10.9093	8.78834	9.87835	8.61747	10.0473	8.33134	11.026	9.42191	11.1104
2006-11-08	10.5502	9.11265	7.31073	5.79234	7.39007	6.22715	8.45768	6.91401	8.31121	7.00077	9.56225	7.93593	5.25646	4.34148	6.89407	5.70247	10.8382	10.092	10.6257	9.49752	10.1828	8.80048	3.66307	2.85115	4.84254	3.8325	7.37943	6.05546	8.72399	7.45918	9.82892	8.72423	9.56129	8.46003	7.29308	6.0917	7.6372	6.53564	9.34258	7.97661	10.5423	9.25418	9.83787	8.77828	10.0843	8.58571	10.9583	9.62155	11.2
2006-11-09	9.77223	8.53437	6.45696	5.21955	6.78343	5.97056	7.62951	6.35018	7.61819	7.16915	8.71258	7.42508	4.75207	3.96554	6.26949	5.04465	10.4286	9.59456	10.0891	8.89869	9.55297	8.16743	3.26919	2.54535	4.38148	3.50004	6.77987	5.57095	8.13154	6.90732	9.32417	8.19753	9.09189	8.11145	6.78094	5.50301	7.14953	6.14841	8.7509	7.27696	9.98809	8.5804	9.48788	8.2855	9.70602	8.22788	10.4968	8.90256	10.7599
2006-11-10	9.51345	8.00134	6.21082	4.70768	6.53637	5.49875	7.34064	5.76559	7.36026	6.12092	8.38006	6.7701	4.41927	3.6961	5.78108	4.70507	10.1233	9.42774	9.60414	8.47891	8.95453	7.59215	2.93421	2.23913	3.95535	3.06379	6.21505	4.99751	7.59336	6.40576	8.84485	7.74297	8.61308	7.57748	6.43235	4.9466	6.85395	5.4333	8.34318	6.62737	9.60473	7.95414	9.1526	8.0575	9.20871	7.6537	10.0774	8.6711	10.6829
2006-11-11	9.06524	7.86865	5.72283	4.59268	6.2846	5.42722	6.8895	5.6329	7.00407	5.93865	7.96265	6.63636	4.17083	3.61846	5.40468	4.58356	9.8755	9.33815	9.23091	8.35172	8.50836	7.45293	2.69683	2.18112	3.6587	2.99526	5.81333	4.89396	7.19767	6.29108	8.48425	7.62687	8.27893	7.49631	5.87699	4.85452	6.2061	5.19153	7.69246	6.49439	8.98622	7.83204	8.82172	8.04184	8.79	7.66844	9.64334	8.64139	9.8089
2006-11-12	8.71549	7.97169	5.38302	4.67073	5.97077	5.43148	6.50471	5.72169	6.66582	6.0024	7.53135	6.70633	4.24699	3.57944	5.60194	4.5384	10.0588	9.32108	9.35065	8.29198	8.58202	7.36505	2.73393	2.13155	3.655	2.92223	5.82566	4.80029	7.26982	6.21329	8.55384	7.55848	8.23587	7.40649	5.93524	5.1593	6.45831	5.45789	7.75918	6.86206	9.05235	8.19364	8.69923	8.22569	8.52086	7.79268	9.50913	8.91368	10.59
2006-11-13	9.44186	7.77776	6.19756	4.53325	6.3995	5.42681	7.2406	5.5558	7.2479	5.8823	8.21358	6.57305	4.68284	3.36307	6.36062	4.20275	10.5702	9.0541	10.0044	7.92572	9.33627	6.99236	3.19164	2.01325	4.18549	2.79613	6.52395	4.5755	7.97357	5.92799	9.16157	7.23907	8.77619	7.24591	6.64777	4.9575	7.21554	5.25672	8.5882	6.61212	9.83059	7.93805	9.17621	8.00775	8.93933	7.7684	10.1735	8.55914	11.014
2006-11-14	9.86856	8.29653	6.58963	4.98283	6.81717	5.53976	7.72016	6.02863	7.68041	6.23459	8.77537	6.9703	4.6406	3.68885	6.12831	4.80284	10.3356	9.58909	9.95935	8.48264	9.39911	7.47156	3.18012	2.13779	4.27379	2.85869	6.63715	4.76696	7.9908	6.29033	9.20038	7.66721	8.97658	7.30039	6.50433	5.44479	7.12848	5.71564	8.42693	7.22699	9.68421	8.54262	9.20208	8.36711	9.27843	7.82378	10.1403	9.13737	11.0694
2006-11-15	8.86741	8.73004	5.53484	5.39591	6.23604	6.00377	6.70733	6.5262	6.87014	6.68915	7.81414	7.56486	3.99469	4.4367	5.06684	5.31668	9.58802	9.84799	8.94088	9.10334	8.24534	8.31653	2.59513	2.59149	3.57948	3.49948	5.66807	5.60852	6.97846	7.03016	8.25571	8.33512	8.21097	8.07908	5.50046	5.86674	5.90466	6.35032	7.2382	7.70377	8.54443	8.99635	8.57134	8.94323	8.59855	8.70049	9.28113	9.85913	10.6989
2006-11-16	8.99923	7.79385	5.71686	4.60085	6.05393	5.55986	6.76905	5.60756	6.85244	5.94231	7.72773	6.65974	4.22171	3.65525	5.66965	4.57996	10.1671	9.26265	9.30549	8.38993	8.44259	7.59613	2.67272	2.3088	3.5111	3.20916	5.64477	5.13583	7.16348	6.44025	8.45192	7.72309	8.01459	7.75752	5.89824	5.08105	6.59732	5.5204	7.71483	6.75787	9.00971	8.0716	8.84918	8.4882	8.46933	8.52333	9.76171	9.16296	11.0453
2006-11-17	9.07602	7.2599	5.73308	4.05239	6.29649	4.99891	6.90197	4.99672	7.01554	5.39417	7.97771	5.95255	4.46934	3.277	5.87986	4.10316	10.1907	9.02069	9.69537	7.79627	9.06026	6.7949	2.99284	1.89504	4.02531	2.62141	6.30945	4.35531	7.68891	5.74914	8.93054	7.087	8.68823	7.03353	6.09077	4.66474	6.63531	4.88606	7.93902	6.27036	9.22261	7.61317	9.023	8.19493	8.98834	7.85052	9.9209	8.84848	10.9928
2006-11-18	8.31209	7.91629	5.00676	4.60864	5.7772	5.31512	6.10733	5.64236	6.34884	5.92024	7.15421	6.59127	4.11206	3.55871	5.28535	4.56554	9.77327	9.3982	9.13564	8.27163	8.42474	7.26361	2.66105	2.04711	3.63301	2.77075	5.76727	4.62791	7.12529	6.11306	8.41146	7.49073	8.26132	7.21276	5.33425	5.27053	5.8654	5.44487	7.03865	6.98341	8.3532	8.31412	8.56034	8.40967	8.53064	8.03106	9.27996	9.15637	10.6843
2006-11-19	8.3452	8.13424	5.02288	4.83673	5.65082	5.62278	6.10071	5.91313	6.31332	6.17869	7.08416	6.93762	4.03411	3.57995	5.24696	4.50565	9.81269	9.25826	9.01943	8.28142	8.20248	7.40721	2.5302	2.18417	3.41305	3.01801	5.495	4.90256	6.93025	6.26383	8.24495	7.58146	7.97417	7.52482	5.35957	5.25658	5.81523	5.512	7.08075	6.94794	8.4065	8.26936	8.54559	8.34623	8.22356	8.13223	9.33112	9.02718	10.79
2006-11-20	8.86752	7.62547	5.54453	4.40662	6.03165	5.337	6.65115	5.40167	6.77635	5.75243	7.65611	6.41134	4.15421	3.34519	5.42243	4.1932	9.91935	9.07403	9.2068	7.90578	8.43804	6.93259	2.6553	1.95903	3.57794	2.70924	5.71568	4.47716	7.13768	5.8642	8.43372	7.19839	8.1668	7.14291	5.70971	4.79401	5.98223	5.22536	7.49693	6.39538	8.8024	7.73047	8.70752	7.95769	8.49676	7.69638	9.52832	8.49441	10.7583
2006-11-21	8.61838	7.56646	5.29027	4.30445	5.97911	5.1628	6.42413	5.30237	6.61466	5.64849	7.48291	6.26649	3.89043	3.38719	4.94369	4.27644	9.53746	9.16424	8.78031	7.98537	8.01383	6.97921	2.4671	1.94502	3.39225	2.66886	5.42615	4.45265	6.77474	5.88563	8.07471	7.24728	7.98053	7.09659	5.56038	4.92011	5.99115	5.3616	7.31402	6.55541	8.62519	7.8994	8.60481	7.97135	8.45551	7.4728	9.37131	8.57445	10.5018
2006-11-22	7.33944	7.44044	4.28376	4.25111	5.35645	5.21796	5.16857	5.21171	5.57346	5.59045	6.19833	6.20804	3.24973	3.27742	4.03818	4.09012	8.90711	8.98577	7.72275	7.78716	6.80922	6.82084	1.99466	1.9369	2.79235	2.69183	4.51796	4.42838	5.81275	5.78674	7.07356	7.09957	7.22134	7.11461	4.69358	4.76499	5.44853	5.0946	6.26595	6.35773	7.58453	7.69055	7.87593	7.79957	7.77639	7.4726	8.33745	8.28892	9.978
2006-11-23	6.33893	6.94371	3.41894	3.8586	4.58529	4.92294	4.10785	4.70984	4.64441	5.16241	5.01143	5.66941	2.72705	3.05129	3.39565	3.79841	8.53238	8.81232	6.87255	7.42144	5.75051	6.36475	1.55142	1.73462	2.17384	2.41305	3.63128	4.0356	4.96519	5.41242	6.2096	6.72895	6.41782	6.76155	4.10433	4.31223	4.67271	4.62389	5.57041	5.81348	6.91381	7.15211	7.32927	7.44134	6.85294	7.00157	7.66542	7.81373	9.86871
2006-11-24	6.5493	6.91422	3.43254	3.75922	4.48143	4.76782	4.25015	4.6394	4.74887	5.08811	5.136	5.56728	2.67958	2.97319	3.33327	3.70109	8.54797	8.76236	6.82237	7.29816	5.60429	6.19994	1.39386	1.65201	1.9364	2.29562	3.36922	3.87817	4.78849	5.27193	6.11308	6.59761	6.1549	6.61563	4.36577	4.36835	4.62838	4.75613	5.89974	5.88988	7.26049	7.2475	7.37707	7.44168	6.70491	6.81044	7.78357	7.86395	9.77724
2006-11-25	7.39601	6.90101	4.13574	3.8141	4.99357	4.87821	5.11031	4.66098	5.47685	5.11874	6.04536	5.61326	3.2387	2.90897	4.12279	3.61714	9.1337	8.69968	7.76428	7.18812	6.62247	6.0824	1.72807	1.62069	2.33928	2.25749	4.04114	3.80798	5.56264	5.18789	6.97502	6.49699	6.69089	6.55923	4.92957	4.20215	5.26142	4.41495	6.57142	5.67205	7.91476	7.00366	7.91225	7.39369	7.25255	6.88219	8.53257	7.76525	10.3604
2006-11-26	7.30081	6.32413	4.16785	3.47269	5.18935	4.66379	5.08644	4.12067	5.48994	4.65973	6.08575	5.03099	3.23449	2.63226	4.02164	3.28821	8.90859	8.45826	7.70296	6.71057	6.76796	5.57077	1.96056	1.50749	2.74052	2.11531	4.45784	3.52319	5.76981	4.8422	7.04411	6.05612	7.16116	6.32492	4.85304	3.73457	5.32088	3.98429	6.47428	5.10789	7.80695	6.43471	7.75217	7.03677	7.48304	6.54694	8.20719	7.25768	10.1887
2006-11-27	6.93377	5.93941	3.80021	3.08426	4.828	4.28726	4.67339	3.68788	5.12244	4.27606	5.61388	4.53977	3.04798	2.41444	3.80631	3.02496	8.85027	8.32925	7.42951	6.36759	6.32735	5.10686	1.6753	1.27567	2.31659	1.78264	3.93524	3.07787	5.35775	4.44871	6.70991	5.68693	6.653	5.9089	4.69081	3.6566	5.15177	3.74284	6.28619	5.02895	7.62952	6.38122	7.67395	6.92815	7.10626	6.19737	8.17446	7.16694	10.2654
2006-11-28	7.27847	6.25139	4.04578	3.22945	4.95545	4.35019	4.99999	3.9633	5.38931	4.50719	5.94078	4.83281	3.17864	2.59105	3.98007	3.22443	8.9595	8.49434	7.64223	6.68331	6.58542	5.41559	1.78596	1.29754	2.4659	1.79855	4.1495	3.1858	5.56804	4.62683	6.921	5.96325	6.842	5.98381	4.80977	3.86848	5.32062	4.02882	6.43276	5.28495	7.77538	6.63834	7.90643	7.0605	7.39092	6.34077	8.48773	7.35018	10.4067
2006-11-29	7.23789	6.69834	4.09214	3.59496	5.10413	4.6516	5.00877	4.4248	5.41863	4.90639	5.9929	5.33947	3.07467	2.76026	3.82525	3.43224	8.81772	8.59091	7.45484	6.94626	6.42168	5.78179	1.77408	1.49389	2.47201	2.08119	4.10697	3.55565	5.46722	4.94627	6.7715	6.25174	6.83146	6.33119	4.79172	4.19072	5.23695	4.46425	6.40724	5.6783	7.74537	7.03874	7.74402	7.34289	7.39584	6.62419	8.21622	7.74753	10.2371
2006-11-30	6.86782	6.83216	3.77498	3.72983	4.83572	4.78447	4.62069	4.57575	5.0821	5.04075	5.56581	5.51198	2.87683	2.75732	3.57611	3.42857	8.66849	8.58718	7.13256	6.94068	6.02402	5.77733	1.60713	1.49475	2.24135	2.08294	3.77565	3.55593	5.14754	4.94436	6.44662	6.24744	6.53365	6.33223	4.52769	4.45657	4.94702	4.91662	6.07796	5.99321	7.41704	7.34402	7.58111	7.36673	7.0737	6.84158	8.02815	7.73083	10.1243
2006-12-01	6.64077	7.23011	3.61103	3.99494	4.71697	4.89999	4.39666	4.94339	4.89105	5.33777	5.32461	5.87371	2.71929	2.90876	3.38314	3.62722	8.54226	8.74598	6.86924	7.20532	5.71801	6.0445	1.50395	1.54665	2.10201	2.13838	3.55559	3.68674	4.91791	5.12376	6.19097	6.48087	6.34094	6.42845	4.30312	4.79835	4.51395	5.20581	5.80965	6.40732	7.15509	7.75577	7.3248	7.52476	6.86628	6.86577	7.65451	7.98813	9.94032
2006-12-02	6.57817	7.80138	3.52441	4.5134	4.61785	5.31158	4.31482	5.54347	4.81559	5.85111	5.22658	6.51767	2.81462	3.16598	3.50578	3.97063	8.67026	8.96703	7.05126	7.62638	5.85791	6.54773	1.47002	1.75498	2.03409	2.41697	3.53502	4.09295	4.97432	5.52951	6.32778	6.89443	6.29388	6.78367	4.41597	5.31355	4.77539	5.62936	5.94995	7.02047	7.3044	8.34865	7.45681	7.86082	6.7501	7.30263	7.90484	8.43463	10.1233
2006-12-03	6.47326	7.92064	3.49951	4.63597	4.63872	5.45009	4.2346	5.68344	4.7527	5.97948	5.14925	6.68564	2.77171	3.34977	3.44813	4.22031	8.56792	9.12284	6.94823	7.9233	5.83593	6.91136	1.57551	1.9191	2.20608	2.63778	3.68666	4.40416	5.02599	5.83139	6.28192	7.19041	6.46575	7.05809	4.15308	5.42521	4.38979	5.94751	5.61839	7.14894	6.94545	8.46816	7.22679	8.02214	6.8251	7.60215	7.50195	8.62565	9.88236
2006-12-04	6.65506	7.55426	3.52945	4.34635	4.56895	5.29086	4.36427	5.32845	4.84884	5.69002	5.26343	6.33305	2.77976	3.21808	3.46038	4.01041	8.63808	8.93181	6.99236	7.68878	5.79247	6.7072	1.44947	1.89396	2.00782	2.6357	3.49129	4.3429	4.92568	5.6975	6.27252	7.00515	6.25729	7.04146	4.14108	5.13426	4.46202	5.67905	5.62639	6.80058	6.9896	8.12815	7.46288	7.81564	6.65569	7.47761	7.93943	8.3144	10.1881
2006-12-05	6.53832	7.17105	3.6151	4.01133	4.7738	5.01169	4.33001	4.92576	4.84116	5.3421	5.26342	5.89298	2.58987	3.06556	3.24854	3.82225	8.41953	8.84287	6.63122	7.45131	5.50175	6.37839	1.52112	1.71891	2.13818	2.38427	3.52313	4.01301	4.81544	5.41129	5.99055	6.74574	6.33175	6.73227	4.016	4.85651	4.49673	5.36302	5.45191	6.47068	6.77589	7.80794	7.42017	7.78914	7.0135	7.27414	7.77532	8.32284	9.95927
2006-12-06	6.49371	6.9075	3.39741	3.8142	4.46364	4.87373	4.19851	4.66504	4.70631	5.12144	5.0833	5.61625	2.61138	2.91531	3.2514	3.62309	8.52934	8.68693	6.72557	7.19075	5.43865	6.11046	1.27575	1.65865	1.76111	2.31641	3.15826	3.87063	4.62642	5.22605	5.98977	6.51345	5.94915	6.62418	3.97743	4.58357	4.08726	5.20923	5.42095	6.14186	6.78489	7.4817	7.30874	7.58671	6.68282	7.19976	7.67532	8.00476	9.68992
2006-12-07	6.6955	6.79788	3.65471	3.69512	4.75292	4.75016	4.45282	4.537	4.93968	5.00624	5.38643	5.46766	2.78184	2.77742	3.45868	3.4533	8.59398	8.60008	6.97518	6.97262	5.83726	5.81952	1.53871	1.5151	2.14805	2.11187	3.63379	3.5952	5.00386	4.97978	6.29181	6.28122	6.40812	6.36857	4.16347	4.45352	4.52153	5.24163	5.63484	5.99055	6.98199	7.33847	7.53566	7.55649	6.88806	6.96732	8.00053	8.01469	9.77216
2006-12-08	6.7965	7.07196	3.65832	3.88012	4.6844	4.84729	4.51645	4.7949	4.98194	5.21829	5.43296	5.72913	2.82604	2.89623	3.51732	3.60957	8.66482	8.73075	7.06438	7.18307	5.89239	6.02361	1.50274	1.54377	2.0844	2.13646	3.59171	3.67878	5.01267	5.11024	6.35132	6.46223	6.3515	6.42388	4.41854	4.75961	4.80602	5.12855	5.95126	6.36482	7.31032	7.71456	7.77693	7.84537	7.2383	7.2753	8.31178	8.41599	8.95806
2006-12-09	7.04709	7.23194	3.88927	4.05027	4.89324	5.02763	4.78734	4.98147	5.21924	5.38704	5.73539	5.94773	2.95725	3.07504	3.68362	3.84082	8.76187	8.86926	7.27654	7.47259	6.15863	6.38333	1.62032	1.70231	2.24766	2.35446	3.8216	3.98682	5.23042	5.40495	6.56753	6.75484	6.55937	6.7002	4.48351	5.05036	4.72232	5.62634	6.0184	6.7095	7.36053	8.04511	7.74761	7.80453	7.32217	7.42843	8.2413	8.30862	8.897
2006-12-10	7.27504	7.20112	4.05523	4.01623	4.98483	4.99037	5.00546	4.9448	5.3984	5.35362	5.9555	5.90428	3.01355	3.04951	3.7555	3.7964	8.80377	8.81197	7.36738	7.41892	6.27293	6.36038	1.67154	1.73154	2.3187	2.40844	3.92115	4.03004	5.32443	5.40818	6.66022	6.7257	6.64936	6.75608	4.43121	5.1457	4.62428	5.62122	5.96082	6.82221	7.31148	8.15373	7.56394	7.83963	7.10562	7.32589	7.99123	8.39348	8.77894
2006-12-11	8.17644	7.35637	4.86159	4.12965	5.4626	5.04915	5.90494	5.09244	6.13306	5.47396	6.84719	6.05125	3.58438	3.09335	4.65761	3.86885	9.50542	8.8948	8.31928	7.50543	7.26066	6.41209	2.0269	1.70512	2.70824	2.35419	4.56626	3.995	6.10592	5.42322	7.49882	6.78099	7.12089	6.70253	5.40439	5.17388	5.56123	5.51433	7.12981	6.85768	8.45659	8.18731	8.0143	7.95803	7.34971	7.51413	8.6765	8.54181	9.18042
2006-12-12	8.21763	7.53117	4.92784	4.2871	5.73961	5.17961	6.01658	5.27722	6.2765	5.63326	7.06782	6.25225	3.64736	3.18551	4.58307	3.98411	9.28544	8.95228	8.38373	7.64989	7.56071	6.60818	2.2732	1.80679	3.14963	2.49911	5.06991	4.18705	6.40107	5.59248	7.7003	6.93648	7.68599	6.8812	5.50886	5.21488	5.72677	5.6903	7.24311	6.90708	8.55483	8.23559	8.17368	8.03299	7.87923	7.6163	8.80609	8.64001	9.15511
2006-12-13	7.69352	7.26949	4.44311	4.11665	5.32618	5.12184	5.45605	5.0404	5.79098	5.44547	6.45387	6.02657	3.30602	3.09138	4.13813	3.84975	9.03545	8.84295	7.84087	7.48646	6.85901	6.4455	1.93089	1.76974	2.67353	2.46149	4.42251	4.10431	5.80587	5.47821	7.1371	6.7947	7.09729	6.82329	5.11126	4.96822	5.29028	5.25747	6.77283	6.60703	8.10309	7.93788	7.88457	7.90448	7.56637	7.55096	8.40627	8.44338	8.95215
2006-12-14	7.84534	6.90438	4.55166	3.80206	5.33221	4.85517	5.5866	4.65691	5.88592	5.1129	6.55959	5.60457	3.35296	3.01263	4.22968	3.75304	9.13562	8.79849	7.93046	7.36431	6.91103	6.27461	1.91297	1.67736	2.62556	2.32838	4.39258	3.9306	5.82824	5.32868	7.19206	6.66026	7.04335	6.65995	5.3097	4.60516	5.55743	4.83932	7.01471	6.1721	8.34285	7.51115	7.87648	7.92247	7.37825	7.44617	8.44125	8.5002	9.01273
2006-12-15	8.7119	6.02953	5.40305	3.44501	5.85907	4.70678	6.47079	3.89875	6.60924	4.46864	7.4353	4.77672	3.79755	2.41318	4.93884	3.11298	9.65404	8.29641	8.65147	6.30786	7.70524	5.20068	2.26373	1.5694	3.03879	2.21157	5.00259	3.49827	6.49482	4.6987	7.85139	5.70915	7.52062	6.32584	6.31563	3.8861	6.615	4.31801	8.19354	5.28388	9.46015	6.58295	8.60036	7.08365	8.07121	6.95916	9.45552	7.23076	10.4487
2006-12-16	9.07665	5.84848	5.74365	2.83227	6.23845	3.9669	6.88652	3.51374	6.98796	4.1087	7.93014	4.32215	3.95938	2.31101	5.08663	2.88089	9.66999	8.32044	8.89746	6.24085	8.10424	4.82319	2.49102	1.00392	3.39422	1.37944	5.45207	2.62251	6.84556	4.12479	8.15743	5.49082	7.97119	5.46017	6.64943	3.96486	6.99381	4.17132	8.58623	5.42327	9.83367	6.80336	8.86322	7.09903	8.76632	6.13532	9.716	7.46769	10.3586
2006-12-17	8.50502	7.00734	5.18585	3.80189	5.91493	4.75186	6.30978	4.71308	6.52094	5.14159	7.369	5.62792	3.65773	2.94773	4.61352	3.68774	9.32639	8.80643	8.40675	7.2778	7.5601	6.10051	2.25439	1.54171	3.11164	2.1205	5.034	3.68665	6.39175	5.15329	7.70584	6.53446	7.63993	6.41475	5.98963	4.79739	6.2414	5.03906	7.81307	6.41194	9.10174	7.76001	8.33312	7.62166	8.27286	6.98941	8.97	8.11758	10.142
2006-12-18	7.98186	7.57898	4.69714	4.31769	5.51355	5.17786	5.75316	5.31722	6.04223	5.66214	6.76684	6.28436	3.31284	3.11257	4.13896	3.88153	9.02027	8.87438	7.84629	7.52583	6.88725	6.47666	1.96076	1.7673	2.72207	2.45261	4.47593	4.10529	5.83833	5.49464	7.15516	6.82432	7.1542	6.81728	5.40684	5.12306	5.59551	5.35196	7.12592	6.79907	8.44365	8.13238	7.87794	7.73504	7.54592	7.25644	8.40051	8.23737	10.298
2006-12-19	7.36495	7.58642	4.21871	4.35305	5.22806	5.26312	5.1514	5.34763	5.54545	5.69986	6.15568	6.34068	2.92999	2.91996	3.64057	3.62872	8.67961	8.68848	7.20598	7.19746	6.15683	6.12152	1.70815	1.66623	2.39169	2.32761	3.95378	3.88425	5.28146	5.23669	6.54402	6.52176	6.70825	6.63739	4.72841	5.0116	5.1112	5.41273	6.30916	6.66179	7.63636	7.99316	7.44857	7.65485	7.06529	7.19208	7.80924	8.1204	9.98438
2006-12-20	6.82515	6.82492	3.74765	3.86183	4.81987	4.99517	4.58048	4.63383	5.04851	5.10767	5.52382	5.60432	2.61349	2.53412	3.25918	3.18117	8.45954	8.38709	6.69049	6.54374	5.5145	5.38248	1.44461	1.46057	2.022	2.05115	3.42068	3.40726	4.77195	4.71371	6.01917	5.89586	6.22342	6.22327	4.39786	4.47086	4.64454	4.94993	5.92398	6.00579	7.27302	7.33599	7.17998	7.33903	6.60333	6.90403	7.48128	7.66845	9.74638
2006-12-21	7.19182	6.30732	3.95441	3.32498	4.85507	4.46498	4.89828	4.04453	5.29656	4.5833	5.81996	4.93193	2.82911	2.28229	3.53414	2.8799	8.71649	8.23895	7.08686	6.14629	5.85995	4.84746	1.43188	1.19813	1.96873	1.67425	3.47516	2.89982	4.95388	4.26358	6.33969	5.46912	6.224	5.74921	4.82756	4.07273	5.20203	4.43604	6.44774	5.53472	7.79736	6.87764	7.4878	7.06934	6.73641	6.48095	7.96004	7.32872	9.94578
2006-12-22	7.68036	6.58246	4.41519	3.49618	5.2693	4.56788	5.42887	4.30341	5.76057	4.80107	6.41016	5.20573	3.23857	2.33203	4.0739	2.92311	9.03955	8.2836	7.74642	6.24055	6.68376	4.92675	1.80796	1.17543	2.48391	1.63803	4.19475	2.89083	5.63808	4.28922	7.00762	5.54587	6.86836	5.73262	5.23855	4.07799	5.95696	4.50846	6.93329	5.55037	8.26238	6.90313	7.93541	7.14526	7.38535	6.41938	8.53719	7.47107	9.18797
2006-12-23	7.86173	6.48043	4.57292	3.54144	5.37187	4.69565	5.61156	4.25817	5.91208	4.77636	6.59634	5.18024	3.42616	2.2261	4.3272	2.84309	9.19187	8.19441	8.04688	6.03752	7.06009	4.76135	1.98592	1.24121	2.72602	1.73863	4.52937	2.93235	5.95508	4.24989	7.31185	5.3823	7.16675	5.78805	5.24659	3.87698	5.73279	4.22538	6.94001	5.29314	8.26621	6.61891	8.07221	7.01543	7.68731	6.47221	8.68691	7.24139	10.2185
2006-12-24	7.75243	6.21163	4.50019	3.27042	5.38066	4.43207	5.5213	3.95574	5.84871	4.50801	6.5278	4.83642	3.26772	2.24657	4.07513	2.81751	8.97139	8.23623	7.76943	6.10877	6.80633	4.73999	1.93687	1.0716	2.6943	1.48824	4.42641	2.69704	5.77832	4.12392	7.08602	5.39957	7.1159	5.55	5.20802	3.81561	5.5337	4.03892	6.89365	5.23391	8.22249	6.59179	8.0222	7.11295	7.65281	6.33245	8.61282	7.43974	10.2923
2006-12-25	6.95735	5.73019	3.94762	3.17083	5.05536	4.44814	4.76128	3.5734	5.21671	4.18074	5.74286	4.40704	2.76571	2.00096	3.44812	2.68918	8.54087	8.07435	6.92324	5.63959	5.85062	4.35853	1.63827	1.26785	2.30209	1.77345	3.77909	2.84104	5.07376	4.07508	6.2809	5.01577	6.56238	5.71257	4.48495	3.42623	5.02464	3.84361	6.00953	4.72111	7.32604	5.97371	7.51272	6.55881	7.23284	6.24776	7.87274	6.54715	9.99163
2006-12-26	6.15807	5.31963	3.31388	2.63032	4.51298	3.90039	3.9376	3.06189	4.49788	3.72735	4.8237	3.8337	2.36195	1.72426	2.97803	2.28232	8.28373	7.90805	6.26959	5.23304	5.02074	3.71672	1.29282	0.798146	1.81071	1.09995	3.07732	2.03022	4.41588	3.42263	5.60523	4.53537	5.91623	4.94682	3.80772	2.92987	4.13422	3.74575	5.20528	4.16444	6.5379	5.50087	7.10426	6.21676	6.54252	5.31885	7.37095	6.21506	9.8605
2006-12-27	5.86276	5.28148	3.05858	2.81679	4.28005	4.12414	3.6234	3.1079	4.22126	3.76799	4.46901	3.8729	2.08864	1.77549	2.70363	2.37968	8.11331	7.94089	5.80934	5.29999	4.48821	3.85023	1.16121	0.935663	1.62361	1.29667	2.74391	2.25055	4.05874	3.58743	5.15336	4.62726	5.6153	5.15619	2.46626	1.75255	2.81032	2.49029	3.42672	2.55334	4.3372	3.39722	6.94842	6.22759	6.3035	5.42243	7.17337	6.20763	9.78907
2006-12-28	6.13006	4.93229	3.13177	2.50874	4.26874	3.83471	3.83826	2.73286	4.39872	3.43562	4.69479	3.44491	2.17394	1.5917	2.72987	2.24262	8.19318	7.85766	5.99432	4.99046	4.58544	3.49987	0.994725	0.894786	1.37793	1.23207	2.54915	2.08457	3.99307	3.39316	5.2765	4.32243	5.41187	5.00172	2.62939	1.59292	2.7784	1.98898	3.62341	2.36881	4.53124	3.22795	7.03616	6.08976	6.29037	5.31488	7.32267	6.01018	9.85377
2006-12-29	6.11668	5.27158	3.32088	2.50417	4.53572	3.75692	3.91142	2.97617	4.47669	3.64937	4.7958	3.73626	2.15304	1.73445	2.78321	2.25136	8.14965	7.91476	5.90899	5.26847	4.62834	3.70536	1.23806	0.69905	1.73432	0.957724	2.88779	1.89694	4.18214	3.34605	5.26337	4.54552	5.75065	4.8165	2.42148	1.83358	2.63337	2.1941	3.35793	2.67543	4.23473	3.57922	6.86491	6.27875	6.31226	5.25607	7.03276	6.33184	9.70569
2006-12-30	5.57074	5.90873	2.94264	3.02193	4.2152	4.21483	3.36767	3.63992	3.99872	4.23175	4.17814	4.48308	1.7986	2.13808	2.4247	2.70282	7.95683	8.15753	5.33049	5.92262	3.9103	4.53454	0.997866	1.02896	1.3854	1.4305	2.3499	2.58173	3.66212	3.98976	4.6686	5.22294	5.25028	5.45011	2.02487	2.28289	2.14207	2.60951	2.87882	3.21648	3.74465	4.12348	6.48786	6.70888	5.85929	5.8003	6.52567	6.90466	9.25556
2006-12-31	5.51874	5.46636	2.75274	3.10968	3.99703	4.41933	3.25371	3.35674	3.89522	3.98533	4.05089	4.14183	1.7278	1.95589	2.29834	2.61597	7.91101	8.04528	5.23405	5.57504	3.73229	4.25052	0.822524	1.24657	1.13565	1.73023	2.11082	2.65105	3.51647	3.83383	4.54301	4.93692	4.99041	5.57142	1.86996	2.01834	1.92156	2.60788	2.69515	2.85972	3.57862	3.67254	6.3893	6.39249	5.54786	5.92156	6.44095	6.35559	9.53239
2007-01-01	5.91941	5.02242	3.01736	2.36661	4.20414	3.65488	3.64528	2.74242	4.23553	3.44513	4.48783	3.47128	1.90169	1.71173	2.45763	2.28968	8.00906	7.90321	5.52738	5.2051	4.06905	3.70458	0.988253	0.554411	1.37442	0.747911	2.43951	1.54639	3.81219	2.98931	4.8312	4.51699	5.16693	4.99018	2.06177	1.58903	2.25203	2.22517	2.9381	2.37267	3.84834	3.25133	6.7273	6.21659	5.78783	5.28279	6.93841	6.22355	9.75701
2007-01-02	6.03874	5.43561	3.1857	2.78804	4.38603	4.06221	3.80012	3.20856	4.37562	3.85776	4.66724	3.99877	2.02911	1.79899	2.60509	2.37183	8.0824	7.95009	5.7298	5.34983	4.33752	3.8773	1.02161	0.88051	1.42233	1.21869	2.51415	2.18766	3.8857	3.55991	5.04686	4.66261	5.39553	5.09468	2.23436	1.8852	2.52866	2.57785	3.14403	2.73322	4.03462	3.62518	6.87063	6.54645	6.19327	5.60265	7.07251	6.68595	9.76925
2007-01-03	6.23908	5.3603	3.21923	2.75305	4.34147	4.0374	3.95047	3.14025	4.49604	3.7976	4.81861	3.91982	2.23151	1.78462	2.80011	2.38777	8.22626	7.94557	6.08412	5.31519	4.70949	3.86812	1.05988	0.939649	1.47167	1.30256	2.67261	2.2614	4.10036	3.59887	5.37451	4.64247	5.5277	5.16624	2.41157	1.88828	2.71633	2.60215	3.36851	2.71975	4.28194	3.57032	6.88315	6.58543	6.15435	5.89526	7.10323	6.67671	9.79536
2007-01-04	6.98584	5.00898	3.78209	2.72345	4.73442	4.05706	4.68996	2.87203	5.12144	3.55453	5.60233	3.58477	2.74121	1.54964	3.42089	2.2307	8.64933	7.84622	6.94475	4.91686	5.68251	3.42772	1.35304	0.916267	1.85999	1.2599	3.32208	2.08799	4.80818	3.37698	6.19554	4.25403	6.08629	5.00443	3.20611	1.55021	3.62808	1.8495	4.33577	2.30398	5.25371	3.11779	7.39313	6.40181	6.54122	5.67541	7.85283	6.43007	10.1596
2007-01-05	7.06618	4.95929	3.96338	2.29499	5.01264	3.58391	4.83848	2.66829	5.2742	3.37939	5.81152	3.38753	2.85009	1.62365	3.54257	2.14245	8.62958	7.85064	7.07952	5.08376	5.98821	3.48669	1.62533	0.640575	2.27359	0.873336	3.79454	1.7531	5.13903	3.19731	6.40938	4.36117	6.5604	4.68473	3.25948	1.54067	3.55815	1.89708	4.37714	2.32514	5.26255	3.22624	7.637	6.49217	7.14337	5.59214	8.10327	6.59901	10.2085
2007-01-06	6.36931	6.03147	3.50291	3.00125	4.68761	4.12285	4.16498	3.71242	4.69824	4.28348	5.08043	4.54552	2.44169	2.18152	3.08214	2.73436	8.32515	8.20442	6.38847	6.012	5.2017	4.59184	1.40982	0.976372	1.98	1.34994	3.28716	2.52548	4.58725	3.98438	5.74346	5.2864	6.11555	5.38648	2.67885	2.40221	3.05847	2.833	3.67627	3.37429	4.55656	4.3037	7.47961	7.05157	7.00498	6.11091	7.87668	7.39486	10.0912
2007-01-07	6.06477	6.4629	3.14352	3.48763	4.31806	4.62643	3.79987	4.22229	4.37126	4.74164	4.66152	5.13505	2.2964	2.35061	2.88233	2.96163	8.25979	8.27898	6.18194	6.25403	4.85506	4.99277	1.14914	1.26969	1.60096	1.77706	2.83513	3.03805	4.23471	4.386	5.4867	5.58495	5.68195	5.87841	2.51914	2.69772	2.68577	3.33569	3.4979	3.70724	4.40367	4.59674	7.1246	7.19973	6.64367	6.64324	7.37872	7.50386	9.78233
2007-01-08	6.29036	6.6546	3.30042	3.53039	4.43716	4.5711	4.02201	4.36452	4.56261	4.84931	4.90517	5.26418	2.48614	2.45995	3.09898	3.06525	8.39958	8.39235	6.50096	6.46496	5.22412	5.159	1.25971	1.20867	1.75278	1.67744	3.08607	2.9973	4.50006	4.4331	5.79712	5.74956	5.90386	5.81736	2.67519	2.75213	3.27347	3.26843	3.68547	3.7855	4.58994	4.69655	7.17158	7.29165	6.41662	6.59649	7.51566	7.66923	9.96668
2007-01-09	6.05555	7.39984	3.28694	4.14049	4.51119	5.00057	3.85412	5.11552	4.42684	5.48198	4.73134	6.05233	2.28272	2.99368	2.92412	3.76194	8.22436	8.87641	6.11907	7.3608	4.89465	6.16928	1.34094	1.54579	1.88256	2.1136	3.10446	3.70023	4.38597	5.19598	5.48139	6.59804	5.95187	6.41207	2.47378	3.16086	3.17739	3.80528	3.42922	4.27809	4.30532	5.1856	7.10611	7.71928	6.56497	7.05354	7.36823	8.26347	9.84772
2007-01-10	5.46514	7.10545	2.89934	4.05788	4.18621	5.14139	3.27403	4.90978	3.91596	5.34461	4.06886	5.9053	1.89796	2.82092	2.50941	3.5193	8.0073	8.56573	5.49717	7.00396	4.10291	5.97883	1.0338	1.72528	1.43899	2.42889	2.45767	3.93408	3.78018	5.19743	4.83377	6.37778	5.34977	6.71086	2.05838	2.92396	2.55063	3.70788	2.92505	3.97347	3.78545	4.8526	6.64159	7.49198	6.12362	7.1671	6.71225	7.85521	9.49092
2007-01-11	5.22994	6.42474	2.63632	3.45342	3.92804	4.5952	2.99963	4.18127	3.67323	4.70559	3.76003	5.08895	1.77626	2.23782	2.36531	2.86094	7.9392	8.20032	5.30647	6.05376	3.8423	4.79001	0.903043	1.26517	1.25038	1.77325	2.20588	2.97271	3.55958	4.28089	4.6267	5.40307	5.11336	5.82663	1.84602	2.48217	2.30842	3.02182	2.67622	3.44703	3.54824	4.33458	6.39686	7.00332	5.60791	6.49128	6.43854	7.21643	9.52298
2007-01-12	5.47385	6.21634	2.71664	3.30804	3.96486	4.48286	3.20703	3.97549	3.85416	4.52785	3.99812	4.86222	1.87909	2.12135	2.43409	2.69296	7.99582	8.14226	5.49018	5.88862	4.02359	4.51158	0.882914	1.04896	1.22268	1.46046	2.236	2.6021	3.63288	3.99173	4.79343	5.19791	5.1361	5.47259	1.95632	2.3254	2.36527	2.81226	2.8183	3.25931	3.71261	4.14827	6.62748	6.80978	5.70244	6.11383	6.79469	6.99191	9.68748
2007-01-13	6.23734	6.21685	3.16329	3.25105	4.25132	4.40158	3.92189	3.95056	4.46377	4.50141	4.7739	4.82744	2.37908	2.31693	2.96411	2.90141	8.36708	8.2796	6.35075	6.22098	4.96283	4.88741	1.06514	1.13993	1.46561	1.58588	2.7437	2.83116	4.2382	4.24547	5.60408	5.51809	5.57098	5.67447	2.46679	2.41886	2.733	2.71656	3.44664	3.38076	4.36913	4.28728	7.23224	6.96879	6.35028	6.17297	7.63408	7.24083	10.044
2007-01-14	6.56367	6.38994	3.5752	3.38359	4.70476	4.50909	4.32933	4.12614	4.83543	4.6534	5.25487	5.02095	2.53834	2.53788	3.17848	3.16086	8.3975	8.43678	6.55823	6.58609	5.37833	5.32763	1.42818	1.29897	2.00276	1.80743	3.36175	3.16747	4.69005	4.58012	5.89922	5.88243	6.17662	5.97721	2.69065	2.55512	3.21512	2.96256	3.6992	3.5394	4.59163	4.43801	7.45867	7.26976	6.9177	6.54912	7.86443	7.64503	10.0934
2007-01-15	6.5828	6.13529	3.49499	3.32589	4.56558	4.53626	4.30301	3.92663	4.80049	4.48966	5.20487	4.81267	2.55016	2.42753	3.17443	3.05823	8.45736	8.32095	6.6128	6.37155	5.34023	5.16261	1.28006	1.36851	1.77684	1.91973	3.14319	3.22018	4.57514	4.53934	5.8984	5.71705	5.94904	6.05044	2.86768	2.41272	3.5142	2.68649	3.92624	3.36049	4.84047	4.24378	7.62678	7.13828	7.01434	6.63849	8.11966	7.40281	10.2164
2007-01-16	6.54602	5.71887	3.57093	2.98306	4.70736	4.22771	4.31561	3.49031	4.82444	4.10561	5.24116	4.3193	2.55201	2.19952	3.19028	2.79517	8.41201	8.18383	6.58534	6.00562	5.39796	4.6882	1.41689	1.16193	1.98499	1.62369	3.35145	2.80507	4.69284	4.15829	5.91954	5.33313	6.16385	5.66507	2.75135	2.12477	3.15997	2.47611	3.76545	3.00871	4.64455	3.87709	7.58172	6.86829	7.13569	6.24495	8.01306	7.05545	9.93178
2007-01-17	6.08006	5.89655	3.26269	2.97567	4.47269	4.15566	3.86142	3.61139	4.43157	4.20417	4.73846	4.44747	2.37188	2.34587	2.98114	2.93028	8.29621	8.30917	6.29288	6.27593	5.02917	4.93289	1.26661	1.12835	1.77154	1.56616	3.04409	2.8269	4.40258	4.26185	5.61855	5.56202	5.88142	5.66477	2.31274	2.3892	2.61263	2.75852	3.23866	3.35637	4.11678	4.28348	7.15576	6.97607	6.72268	6.17918	7.41021	7.25136	9.87513
2007-01-18	5.61263	6.16741	2.97848	3.25274	4.24834	4.42666	3.41218	3.91784	4.03807	4.47632	4.22877	4.79617	2.22353	2.45228	2.82695	3.07142	8.19657	8.35062	6.04138	6.42628	4.74276	5.18898	1.19765	1.32006	1.67529	1.84661	2.86884	3.16134	4.21032	4.52056	5.37474	5.75153	5.72559	5.98739	2.07004	2.69636	2.40932	3.2481	2.9461	3.7068	3.81901	4.59961	6.81786	7.04517	6.18924	6.40488	6.98613	7.30811	9.32491
2007-01-19	5.59625	6.03454	2.77897	3.18997	4.00584	4.3932	3.31924	3.79899	3.95127	4.37504	4.12358	4.66643	2.19501	2.31559	2.77367	2.92204	8.18908	8.25695	6.01016	6.19692	4.65933	4.92139	1.09944	1.24212	1.53217	1.73778	2.71266	2.9804	4.10099	4.33098	5.32047	5.52641	5.57355	5.82542	2.16127	2.48264	2.38182	2.92625	3.07176	3.44735	3.97908	4.33547	6.92794	6.92616	6.11353	6.29159	7.18818	7.13947	9.47676
2007-01-20	6.14502	5.87125	3.15601	3.06573	4.29735	4.28651	3.85936	3.63236	4.41837	4.22915	4.72032	4.47912	2.52253	2.22342	3.14029	2.81549	8.45565	8.20122	6.57703	6.04893	5.2669	4.72974	1.21715	1.15874	1.68273	1.61837	3.03465	2.81288	4.49671	4.17704	5.84626	5.37128	5.84168	5.66999	2.57395	2.28701	3.02002	2.58261	3.57094	3.21019	4.48268	4.09353	7.19352	6.94316	6.47725	6.20826	7.53652	7.18911	8.73759
2007-01-21	6.55214	5.95657	3.48868	3.05832	4.5766	4.24536	4.28083	3.6886	4.78416	4.27418	5.18566	4.53737	2.78281	2.28998	3.46048	2.87492	8.61322	8.25562	6.98575	6.17147	5.82198	4.842	1.50109	1.144	2.08912	1.59368	3.57501	2.8245	4.97266	4.22455	6.28689	5.476	6.3458	5.67221	2.85241	2.31726	3.51748	2.50355	3.90331	3.25679	4.8089	4.16054	7.43711	7.04643	6.78418	6.34517	7.86313	7.32562	9.47063
2007-01-22	6.97427	6.28972	3.79289	3.28297	4.77309	4.41103	4.69134	4.01348	5.12854	4.55337	5.61547	4.8927	2.91307	2.54526	3.62989	3.16838	8.73892	8.45507	7.20872	6.60545	6.06119	5.32912	1.56551	1.27321	2.16814	1.76686	3.71921	3.13068	5.14394	4.5649	6.49143	5.88986	6.46238	5.93709	3.1761	2.68332	3.48221	2.86343	4.29647	3.7036	5.20373	4.61751	7.64582	7.32164	7.07371	6.58878	8.13602	7.72126	9.17605
2007-01-23	7.08578	6.18157	3.94889	3.34402	4.97115	4.54439	4.84254	3.96673	5.27232	4.52399	5.80598	4.85706	2.99067	2.51094	3.72382	3.14798	8.77744	8.37851	7.32719	6.5124	6.23374	5.32449	1.66451	1.41163	2.31222	1.97968	3.90355	3.32426	5.29819	4.65125	6.6257	5.85409	6.63761	6.14303	3.166	2.54583	3.70474	2.71114	4.27371	3.51466	5.16571	4.38558	7.75446	7.20696	7.25583	6.72764	8.26987	7.49408	8.92668
2007-01-24	6.67691	5.85689	3.67141	3.04859	4.78927	4.26907	4.44856	3.6151	4.93962	4.21375	5.38785	4.45946	2.78398	2.29048	3.4632	2.89282	8.57485	8.2418	6.96727	6.15672	5.86256	4.869	1.58991	1.21883	2.22683	1.70442	3.71373	2.93396	5.04929	4.28856	6.30287	5.48412	6.4912	5.78228	2.71526	2.24862	3.35357	2.35567	3.72317	3.16866	4.6032	4.06117	7.41385	6.96433	7.0462	6.34247	7.7563	7.18981	8.64836
2007-01-25	6.40099	6.0626	3.41302	3.10437	4.54756	4.26299	4.14705	3.78096	4.67374	4.35161	5.04767	4.63567	2.56679	2.39998	3.20155	2.99524	8.4339	8.34384	6.61857	6.36269	5.41227	5.04535	1.38751	1.17917	1.93957	1.63842	3.3142	2.92716	4.68132	4.35387	5.93916	5.65277	6.12298	5.75734	2.4584	2.43644	2.97981	2.55952	3.42342	3.4031	4.32043	4.3121	7.26751	7.0609	6.62796	6.30509	7.6208	7.36007	8.64079
2007-01-26	6.35899	6.38474	3.38509	3.37856	4.52763	4.50428	4.10635	4.12039	4.63891	4.64831	5.00343	5.01442	2.48167	2.63946	3.10235	3.28385	8.37484	8.5131	6.47831	6.75409	5.24182	5.52877	1.32495	1.37277	1.85195	1.90909	3.18228	3.32142	4.5513	4.73444	5.79838	6.04892	6.00366	6.11459	2.67305	2.74042	3.20334	3.07422	3.69052	3.76913	4.60248	4.67742	7.23821	7.22978	6.65533	6.56534	7.56485	7.57412	8.6023
2007-01-27	6.10923	6.37964	3.2771	3.41343	4.48165	4.55891	3.88794	4.13299	4.45443	4.6632	4.76793	5.03476	2.40788	2.65176	3.01922	3.30186	8.32274	8.49514	6.35485	6.75912	5.09697	5.5812	1.27992	1.44833	1.78939	2.02406	3.08103	3.44275	4.44639	4.80972	5.67702	6.07906	5.91317	6.23842	2.67436	2.79349	3.1265	3.0466	3.67854	3.82645	4.56678	4.72357	7.04756	7.28537	6.47804	6.67402	7.29326	7.63863	8.47658
2007-01-28	5.77644	6.37948	3.02428	3.37434	4.26282	4.50076	3.54813	4.11497	4.15637	4.64361	4.38475	5.00844	2.35582	2.54257	2.95877	3.17331	8.28964	8.41663	6.27052	6.57843	4.99004	5.36419	1.23568	1.37068	1.72645	1.91614	2.99095	3.27817	4.36182	4.64514	5.58991	5.89925	5.83023	6.09062	2.43864	2.65936	2.75017	3.08417	3.39576	3.66341	4.28501	4.55802	6.90071	7.08663	6.23605	6.55432	7.11147	7.3386	8.41656
2007-01-29	5.9021	6.63757	2.99077	3.54352	4.17445	4.60841	3.62181	4.36135	4.21409	4.85142	4.46029	5.26972	2.3706	2.64537	2.97091	3.29122	8.30479	8.5276	6.29986	6.76881	5.01132	5.53103	1.22305	1.35588	1.70678	1.88194	2.97943	3.29715	4.36447	4.72537	5.61197	6.05505	5.8162	6.08753	2.48185	2.84785	2.77659	3.16235	3.45661	3.90254	4.36248	4.81573	6.99435	7.16267	6.23922	6.412	7.26628	7.50201	8.497
2007-01-30	6.01138	7.01017	3.18866	3.83538	4.39947	4.82253	3.78222	4.73581	4.36118	5.16971	4.64843	5.66941	2.34172	2.87318	2.94746	3.57784	8.27637	8.70396	6.24303	7.14233	4.96882	5.98448	1.24582	1.53771	1.74216	2.13145	2.99886	3.66254	4.35769	5.08465	5.56849	6.42754	5.84031	6.41356	2.5045	3.02402	2.74754	3.3119	3.47549	4.10607	4.36591	5.00517	7.0073	7.35642	6.37044	6.72349	7.25401	7.7443	8.47034
2007-01-31	5.93243	7.11145	3.06224	3.95723	4.26033	4.96365	3.67363	4.86181	4.26262	5.28626	4.52262	5.82192	2.38017	2.92229	2.97711	3.63472	8.31858	8.71483	6.32172	7.21193	5.02013	6.10483	1.1872	1.64522	1.65855	2.28322	2.87859	3.8688	4.24467	5.27199	5.62466	6.5171	5.78732	6.56385	2.46817	2.93838	2.87179	3.1475	3.43706	4.00196	4.33733	4.90003	6.93627	7.51758	6.26683	6.91158	7.1626	7.96428	8.43618
2007-02-01	5.83547	7.16876	3.09155	3.97561	4.32996	4.94052	3.61764	4.90319	4.21814	5.31453	4.46355	5.85268	2.29164	2.99294	2.90905	3.73395	8.23556	8.8047	6.14801	7.33959	4.88892	6.21867	1.16029	1.68365	1.62137	2.33268	2.80086	3.94745	4.15371	5.35709	5.4906	6.62081	5.85972	6.57451	2.42776	2.86205	2.65352	3.11613	3.38239	3.91062	4.27111	4.81004	6.84107	7.44039	6.17498	6.95477	7.02818	7.8243	8.38036
2007-02-02	5.8899	6.87822	2.97698	3.84026	4.16043	4.93524	3.60743	4.65928	4.20123	5.12329	4.4438	5.62199	2.2787	2.9194	2.85784	3.62811	8.2532	8.68924	6.15758	7.19709	4.81146	6.11933	1.11405	1.66345	1.54966	2.32332	2.77495	3.87965	4.18896	5.23382	5.45495	6.52043	5.6238	6.63266	2.40543	2.63048	2.74318	2.91652	3.36144	3.6232	4.26147	4.50842	6.89212	7.13277	6.13065	6.62589	7.12421	7.39688	8.43494
2007-02-03	5.98198	6.24607	3.18275	3.38142	4.40142	4.57088	3.75905	4.02758	4.34161	4.57658	4.62297	4.92464	2.32446	2.65496	2.93105	3.30885	8.26317	8.48628	6.21219	6.75713	4.93812	5.60044	1.24514	1.48288	1.7419	2.07637	2.98926	3.49652	4.34155	4.8419	5.54087	6.08865	5.8331	6.29334	2.32849	2.29505	2.52199	2.52602	3.25928	3.21666	4.13992	4.09389	6.85812	6.94353	6.20616	6.28974	7.04848	7.16879	8.3846
2007-02-04	5.72966	5.83833	2.97895	3.07313	4.21956	4.30612	3.49631	3.61213	4.11053	4.21266	4.32604	4.45714	2.18161	2.48765	2.78018	3.10988	8.17139	8.37789	5.9734	6.48732	4.65669	5.25523	1.16361	1.33314	1.6265	1.86382	2.79801	3.19722	4.14366	4.56364	5.30438	5.80872	5.66006	6.01784	2.29279	2.0732	2.56454	2.32292	3.22666	2.95058	4.12777	3.82677	6.68984	6.85257	6.01807	6.17792	6.81791	7.04648	8.29263
2007-02-05	6.08099	5.82992	3.07032	2.97508	4.20193	4.18187	3.77737	3.56528	4.34338	4.16743	4.62331	4.40068	2.41245	2.54891	3.0056	3.17412	8.37584	8.44475	6.39717	6.60421	5.04519	5.34969	1.12733	1.30742	1.55772	1.81918	2.8531	3.18491	4.32116	4.59724	5.66468	5.9006	5.67772	5.99291	2.79686	2.14006	3.0405	2.40657	3.8457	3.04292	4.76602	3.94489	6.91651	7.03677	6.03523	6.23689	7.18937	7.33753	8.48396
2007-02-06	6.81973	6.04811	3.66574	3.14207	4.67663	4.32317	4.53363	3.78785	4.99413	4.36165	5.44668	4.64936	2.81968	2.71253	3.51088	3.37376	8.66805	8.5671	7.05718	6.87374	5.87299	5.67532	1.48405	1.43145	2.05567	1.99043	3.55942	3.44023	4.99092	4.85015	6.33814	6.16916	6.31866	6.22147	3.298	2.32276	3.61381	2.63667	4.44071	3.25902	5.3428	4.15463	7.32791	7.16939	6.60048	6.53208	7.72869	7.48208	8.70632
2007-02-07	7.32383	6.09433	4.09339	3.20479	5.007	4.39061	5.05297	3.84682	5.43745	4.41498	6.00336	4.71774	3.03512	2.70292	3.79001	3.36305	8.84154	8.53303	7.40911	6.84386	6.30052	5.6825	1.6621	1.48475	2.29799	2.07436	3.9101	3.51949	5.33499	4.88684	6.68844	6.16304	6.62989	6.307	3.67602	2.27241	4.06989	2.61532	4.894	3.19276	5.7867	4.07682	7.61765	7.11287	7.01728	6.49959	8.1037	7.39634	8.8638
2007-02-08	7.77641	6.10494	4.4887	3.19025	5.28625	4.36615	5.51518	3.84779	5.82572	4.41421	6.48487	4.71661	3.21828	2.61941	4.03959	3.26196	9.00743	8.47771	7.71018	6.70946	6.65376	5.51009	1.80489	1.40812	2.48566	1.96593	4.18775	3.36796	5.61847	4.74638	6.98003	6.02353	6.86901	6.16776	4.04732	2.27409	4.38139	2.73515	5.33431	3.20244	6.21062	4.10179	7.8713	7.21295	7.34251	6.51115	8.44181	7.56012	9.02163
2007-02-09	7.75213	5.95172	4.50208	3.16869	5.38634	4.39289	5.52266	3.73185	5.85072	4.31809	6.53098	4.59252	3.26811	2.45423	4.09259	3.08118	9.01649	8.34369	7.7827	6.42162	6.77505	5.20615	1.88372	1.35837	2.60486	1.90354	4.33412	3.21863	5.73147	4.55482	7.07156	5.75864	7.01332	6.04507	3.86443	2.27347	4.10408	2.93996	5.11056	3.19432	5.98724	4.07763	7.83125	6.97461	7.44454	6.4853	8.34897	7.17037	8.94261
2007-02-10	7.63738	5.66966	4.37767	2.94781	5.24239	4.19756	5.38486	3.44085	5.72352	4.06216	6.36412	4.26325	3.11388	2.39151	3.87738	2.99183	8.85566	8.32361	7.52136	6.33821	6.49433	5.04661	1.79614	1.22036	2.49952	1.70132	4.15394	2.98516	5.52094	4.3811	6.83311	5.6446	6.86996	5.81844	3.77431	2.21233	4.00749	2.77276	5.00835	3.12528	5.89469	4.01744	7.77807	6.85301	7.30184	6.10367	8.29729	7.06618	8.93427
2007-02-11	7.48728	5.88091	4.27757	2.95858	5.22026	4.13846	5.25176	3.5932	5.62114	4.18794	6.24415	4.42666	3.04654	2.5957	3.79999	3.23011	8.83567	8.48888	7.42295	6.68647	6.33444	5.43334	1.69176	1.32034	2.34417	1.83343	3.9629	3.22319	5.37094	4.65042	6.71207	5.97404	6.68389	6.02203	3.68905	2.50296	3.96872	2.97883	4.90296	3.4873	5.78787	4.40286	7.84675	7.13489	7.36602	6.3459	8.39499	7.47284	9.72489
2007-02-12	7.74442	6.55928	4.45193	3.44931	5.22897	4.50356	5.47207	4.26501	5.7829	4.76324	6.42629	5.15512	3.43799	2.91141	4.39562	3.63318	9.29461	8.75654	8.08023	7.21244	7.02409	6.04336	1.92789	1.53711	2.61112	2.12213	4.41032	3.67135	5.9071	5.11775	7.29775	6.48235	7.02086	6.41076	3.87171	2.8348	4.2036	3.40982	5.12631	3.8815	6.0113	4.78675	8.043	7.50938	7.56998	6.83591	8.66837	7.97023	9.80161
2007-02-13	8.13868	6.74159	4.8295	3.69101	5.56746	4.78225	5.90157	4.49986	6.15827	4.9803	6.90328	5.438	3.88714	3.02605	5.03498	3.76828	9.68455	8.80138	8.78935	7.38348	7.91242	6.3074	2.37815	1.70004	3.21124	2.36233	5.22416	3.97171	6.67614	5.36019	8.01241	6.68475	7.73648	6.70028	4.07909	2.84128	4.42514	3.37815	5.36999	3.88465	6.24342	4.78216	8.31229	7.60129	7.91569	7.10135	9.02535	8.05463	9.32393
2007-02-14	7.53853	6.48408	4.376	3.49534	5.3681	4.6271	5.33767	4.23992	5.7082	4.75607	6.36288	5.15316	3.57719	2.88667	4.47451	3.58792	9.19672	8.67076	8.26355	7.14633	7.44174	6.04832	2.24004	1.62505	3.11658	2.268	5.00474	3.80746	6.3127	5.17167	7.59725	6.46456	7.6419	6.56478	3.52066	2.68664	3.81759	3.20017	4.69246	3.69604	5.56884	4.58953	8.07574	7.33124	7.86011	6.88098	8.64858	7.66142	9.08089
2007-02-15	6.44636	6.63601	3.59849	3.52798	4.78652	4.58228	4.25917	4.3523	4.78261	4.84119	5.18828	5.25535	2.9822	3.07108	3.70477	3.85662	8.71621	8.91928	7.29049	7.48065	6.26339	6.33781	1.75425	1.63747	2.45632	2.24594	4.04521	3.87255	5.36769	5.34375	6.63062	6.73046	6.79152	6.57439	2.7783	3.05373	3.06817	3.35311	3.79803	4.15469	4.67624	5.07144	7.39924	7.49964	7.10958	6.78197	7.71555	7.96798	8.98826
2007-02-16	5.8541	7.35735	3.05018	4.10002	4.27204	4.96359	3.6138	5.0691	4.21277	5.44126	4.45814	6.00045	2.78109	3.49324	3.45824	4.44751	8.61061	9.29872	6.98233	8.16226	5.81971	7.16119	1.50226	2.01121	2.09122	2.74022	3.57626	4.57098	4.97211	6.03066	6.28451	7.40191	6.34759	7.18156	2.59663	3.90488	2.70397	4.18289	3.59507	5.16758	4.50178	6.05356	7.18127	8.11263	6.51474	7.52096	7.50637	8.79551	9.72821
2007-02-17	5.87923	7.85203	3.0301	4.56598	4.23713	5.37303	3.62298	5.60364	4.21886	5.90671	4.46649	6.59076	2.77266	3.65898	3.44741	4.65582	8.59584	9.40055	6.96448	8.42048	5.81062	7.51556	1.51274	2.19986	2.10887	3.00929	3.58977	4.92458	4.97349	6.33958	6.27363	7.68186	6.36405	7.51112	2.57648	4.1268	2.84761	4.42737	3.56096	5.42471	4.45057	6.29494	7.18939	8.35443	6.57516	8.05478	7.50425	9.06002	9.89307
2007-02-18	5.7835	8.442	3.05585	5.12145	4.30004	5.68828	3.56603	6.19363	4.17285	6.38387	4.40508	7.16439	2.66953	4.06663	3.3235	5.37366	8.506	9.94818	6.78719	9.07107	5.61884	8.19656	1.46691	2.5251	2.05063	3.35791	3.4785	5.43717	4.84154	6.93171	6.10908	8.24995	6.27171	7.87412	2.31511	4.28889	2.62908	4.51287	3.2418	5.61888	4.12055	6.48354	6.99303	8.80942	6.42623	8.45701	7.21599	9.70126	9.81833
2007-02-19	5.52102	7.9638	2.86025	4.74208	4.12861	5.66715	3.29895	5.7814	3.93761	6.09044	4.10151	6.84565	2.45077	3.72399	3.07774	4.65761	8.34099	9.28623	6.41548	8.49289	5.19992	7.7557	1.35794	2.40516	1.90308	3.35253	3.21631	5.31586	4.55133	6.58504	5.75309	7.84561	6.04325	7.93213	2.06768	4.00278	2.47973	4.60068	2.94238	5.27338	3.81383	6.14427	6.84888	8.73141	6.16172	8.69651	7.0445	9.51912	9.74823
2007-02-20	5.5241	7.45361	2.79095	4.21151	4.04339	5.10669	3.27317	5.19097	3.91343	5.5568	4.07329	6.1542	2.35906	3.49402	2.95718	4.44965	8.2977	9.30122	6.28144	8.16376	4.98714	7.16156	1.21189	2.01067	1.69082	2.73876	2.95748	4.5697	4.34457	6.03069	5.59252	7.40249	5.79583	7.17962	2.04481	3.73487	2.30299	4.31689	2.92518	4.95887	3.81897	5.84461	6.7442	8.42887	6.06228	8.23557	6.89649	9.13735	9.65513
2007-02-21	5.96913	7.83962	3.00916	4.54634	4.16977	5.32803	3.67531	5.58057	4.25774	5.88077	4.51535	6.55315	2.72488	3.81298	3.39881	4.91734	8.63267	9.60326	6.91683	8.67168	5.65283	7.77649	1.34474	2.31079	1.85006	3.12878	3.3041	5.10901	4.78661	6.55808	6.17017	7.90134	6.07205	7.64277	2.47026	3.90108	2.71905	4.47	3.44965	5.16028	4.36894	6.04302	6.95458	8.49297	6.10657	8.17581	7.23433	9.25701	9.8333
2007-02-22	6.7259	7.6914	3.57546	4.4627	4.59112	5.37962	4.43006	5.46945	4.90264	5.81012	5.3296	6.48364	3.21675	3.88266	4.05172	4.98006	9.03695	9.60757	7.71471	8.77675	6.6299	7.94982	1.77306	2.41161	2.43067	3.28663	4.12943	5.30744	5.58809	6.71152	6.96704	8.03375	6.80354	7.84215	3.12215	3.66965	3.46074	4.03247	4.23351	4.8756	5.14538	5.75662	7.41965	8.28367	6.67574	8.10393	7.86217	8.93104	10.1308
2007-02-23	7.26519	7.83381	4.0497	4.53459	4.98545	5.28875	4.99732	5.56475	5.39244	5.86088	5.94874	6.52291	3.4388	4.00581	4.34321	5.21479	9.19995	9.80033	8.06665	8.97568	7.08689	8.13877	1.99995	2.49548	2.74593	3.36161	4.5557	5.42843	5.97831	6.87458	7.33308	8.19516	7.19118	7.91019	3.62234	3.69072	4.08636	4.2064	4.82898	4.91032	5.7234	5.80223	7.90411	8.34563	7.31117	7.95171	8.50423	9.07109	10.4403
2007-02-24	7.27898	7.85969	4.09889	4.60073	5.07741	5.47037	5.0354	5.63743	5.43545	5.95014	6.01018	6.65672	3.36467	3.97525	4.21604	5.10171	9.08253	9.67218	7.93538	8.92148	6.97658	8.14295	1.98452	2.51333	2.74672	3.4288	4.52487	5.49573	5.90358	6.87978	7.23249	8.18711	7.18865	8.01472	3.48671	3.63663	4.0636	4.30753	4.65714	4.83939	5.54285	5.72424	8.01054	8.32874	7.63945	8.08424	8.59689	9.01039	10.4378
2007-02-25	6.76144	7.54848	3.76049	4.31389	4.87822	5.22198	4.5455	5.30387	5.02608	5.66037	5.49882	6.28953	3.09202	3.77352	3.84598	4.80448	8.82497	9.47878	7.48079	8.59996	6.46139	7.7555	1.79848	2.32501	2.50785	3.18507	4.15186	5.15786	5.50366	6.54776	6.80199	7.87247	6.8746	7.72565	2.9235	3.60673	3.52269	3.92628	3.97402	4.80881	4.85563	5.70095	7.68086	8.18803	7.34381	7.88273	8.1244	8.82894	10.1917
2007-02-26	6.09926	7.83601	3.29314	4.53945	4.50571	5.30709	3.88762	5.57169	4.45522	5.8699	4.76853	6.53679	2.76986	3.9424	3.44578	5.13692	8.56731	9.76453	6.94562	8.87733	5.83146	8.00117	1.57222	2.42109	2.20124	3.25443	3.68087	5.28855	5.02153	6.75418	6.2786	8.08691	6.46013	7.77867	2.57172	4.16514	3.02458	4.5146	3.55767	5.47562	4.45193	6.348	7.29395	8.50407	6.82193	8.08835	7.61457	9.29619	9.97216
2007-02-27	6.10349	8.33273	3.11487	5.01052	4.2576	5.6643	3.81294	6.09377	4.37722	6.31243	4.66758	7.08748	2.77184	4.25327	3.4499	5.6038	8.62937	10.0548	6.97838	9.36052	5.77883	8.6007	1.44739	2.74364	2.00593	3.67225	3.48548	5.8475	4.91684	7.28546	6.26046	8.56798	6.25338	8.25945	2.6239	4.65372	3.09217	4.9616	3.62718	6.04899	4.53335	6.89252	7.2353	9.01631	6.57795	8.78883	7.58005	9.95519	9.99413
2007-02-28	6.04165	8.13038	3.29021	4.84137	4.51925	5.65205	3.84558	5.91801	4.41976	6.18824	4.72179	6.95396	2.6599	4.17688	3.31973	5.40628	8.47808	9.87058	6.7568	9.23992	5.62502	8.52682	1.52465	2.70765	2.13908	3.67748	3.56142	5.83648	4.88176	7.21375	6.10153	8.49798	6.35902	8.30384	2.40874	4.43878	2.82865	4.81335	3.34852	5.79359	4.21578	6.64721	7.015	8.8547	6.49981	8.87074	7.23362	9.67749	9.78649
2007-03-01	5.48987	7.77081	2.8774	4.50544	4.15583	5.36111	3.2833	5.53135	3.92415	5.85243	4.08195	6.52871	2.35844	3.89807	2.97216	4.9802	8.28277	9.58653	6.26541	8.79762	5.01102	8.00205	1.28255	2.4472	1.79572	3.34833	3.06066	5.38085	4.40399	6.75951	5.59866	8.07127	5.90001	7.92193	2.02717	4.03335	2.5539	4.46262	2.8936	5.31301	3.76483	6.185	6.80104	8.41239	6.11977	8.2754	6.97594	9.10029	9.73461
2007-03-02	5.31613	7.5841	2.70188	4.34935	3.98674	5.25734	3.088	5.34402	3.75134	5.6962	3.86102	6.33564	2.34081	3.68104	2.93302	4.66821	8.28973	9.38746	6.2552	8.45097	4.94406	7.57973	1.18097	2.244	1.64576	3.08131	2.90316	5.01079	4.30186	6.3996	5.56033	7.72871	5.74368	7.60123	1.95941	3.68099	2.55691	4.36892	2.81771	4.89238	3.70054	5.77584	6.7398	8.13936	6.01863	7.84341	6.90028	8.75839	9.60341
2007-03-03	5.51972	7.09998	2.7468	3.99995	3.98919	5.05043	3.25195	4.87786	3.89343	5.30962	4.04875	5.85718	2.44713	3.44896	3.05742	4.32822	8.35998	9.14963	6.42834	8.07077	5.16066	7.14617	1.26803	2.06334	1.76888	2.85448	3.08161	4.67452	4.47181	6.04541	5.73746	7.36975	5.90698	7.32253	2.17496	3.28753	2.81882	4.0302	3.08744	4.4182	3.99373	5.30705	6.87326	7.90125	6.07456	7.55682	7.1073	8.43649	9.81108
2007-03-04	6.03851	6.69771	3.07272	3.64025	4.22853	4.72841	3.75051	4.44725	4.32394	4.93275	4.60002	5.37662	2.71942	3.33508	3.38676	4.18918	8.60646	9.08706	6.89974	7.89454	5.65951	6.89789	1.37459	1.92803	1.89928	2.65899	3.35154	4.42018	4.80758	5.8276	6.16868	7.17476	6.125	7.08277	2.6242	2.98895	3.00453	3.38593	3.63302	4.06041	4.54785	4.95592	7.20265	7.52752	6.43514	7.14336	7.56267	7.92066	10.0114
2007-03-05	6.97873	7.27025	3.75534	4.01082	4.67825	4.86688	4.66797	4.96808	5.09557	5.34946	5.56461	5.88101	3.35245	3.72276	4.28309	4.82991	9.23372	9.58705	7.9459	8.53411	6.84646	7.55869	1.83599	2.18754	2.48294	2.93837	4.23949	4.86722	5.75325	6.36666	7.15632	7.73365	6.86471	7.40259	3.52637	3.45452	3.80548	4.00791	4.72167	4.6337	5.62687	5.54019	7.72756	7.80002	7.03795	7.1132	8.28122	8.3822	10.3507
2007-03-06	8.24009	7.87405	4.92401	4.58761	5.51478	5.39453	5.9736	5.62835	6.19229	5.92876	6.92171	6.61914	4.05166	4.02103	5.34181	5.20668	9.92215	9.77074	9.04807	8.9976	8.17576	8.19621	2.51322	2.53024	3.34826	3.42638	5.42291	5.50679	6.91201	6.92441	8.23227	8.23672	7.86773	7.99827	4.29198	3.87592	4.66366	4.66231	5.62392	5.12776	6.4886	6.00979	8.31768	8.22293	7.82623	7.79172	9.0562	8.90938	10.7233
2007-03-07	8.41603	7.76088	5.09926	4.50332	5.83045	5.37425	6.21059	5.52664	6.43282	5.85146	7.25583	6.52986	4.14537	3.98752	5.35853	5.14008	9.83975	9.71445	9.19038	8.94332	8.46675	8.14722	2.67664	2.50904	3.63777	3.40978	5.78245	5.47825	7.16115	6.88208	8.44945	8.19436	8.25792	7.98532	4.2795	3.92402	4.66628	4.5816	5.60573	5.1847	6.46796	6.06472	8.43452	8.25269	8.20301	7.96117	9.15471	8.91593	10.6704
2007-03-08	7.56793	7.64303	4.39138	4.38749	5.36986	5.26054	5.3628	5.39476	5.72781	5.73412	6.38635	6.37909	3.64495	3.90546	4.57456	5.01382	9.2725	9.6294	8.3775	8.81293	7.5632	7.99363	2.28129	2.43332	3.16482	3.31473	5.08486	5.34612	6.40657	6.74931	7.70015	8.06926	7.70411	7.87527	3.63719	4.07623	4.09992	4.68771	4.83369	5.36693	5.71015	6.24158	7.98008	8.2928	7.78196	7.94335	8.50959	8.98646	10.3103
2007-03-09	7.15374	7.46409	3.9715	4.2562	4.94905	5.20128	4.89303	5.22678	5.3081	5.59934	5.84618	6.21642	3.46216	3.70421	4.38305	4.69161	9.23421	9.39153	8.10667	8.48552	7.12389	7.63581	2.01003	2.27793	2.7538	3.13314	4.57353	5.07552	6.00616	6.45022	7.36559	7.77149	7.20054	7.66529	3.46355	3.82443	3.69784	4.76284	4.63871	5.06183	5.53655	5.93922	7.75811	8.09168	7.28799	7.83547	8.26764	8.68136	10.279
2007-03-10	7.68565	7.41199	4.39561	4.18116	5.17791	5.09455	5.40787	5.15234	5.72668	5.52615	6.35475	6.11753	3.79346	3.68066	4.9096	4.70392	9.61647	9.44866	8.64312	8.4587	7.71879	7.53987	2.2756	2.20156	3.06916	2.99963	5.03596	4.92191	6.50691	6.35654	7.85852	7.70576	7.56515	7.49582	3.88165	3.48944	4.18023	4.373	5.13882	4.66371	6.02375	5.55357	8.15126	7.97389	7.59586	7.56101	8.84035	8.55614	10.5805
2007-03-11	7.96223	7.63493	4.67627	4.37008	5.48855	5.2238	5.7295	5.37756	6.02023	5.71467	6.73782	6.35098	3.95192	3.80181	5.08946	4.87723	9.684	9.55637	8.88734	8.65083	8.07652	7.77791	2.47259	2.31995	3.36106	3.15653	5.4126	5.13638	6.82054	6.56146	8.13763	7.89785	7.9274	7.68332	4.09576	3.59583	4.64708	4.47879	5.38989	4.7973	6.26234	5.6917	8.4127	8.07249	8.11032	7.64268	9.14185	8.6987	10.6336
2007-03-12	7.85742	8.16328	4.57751	4.84642	5.40189	5.51266	5.61627	5.90746	5.92166	6.14864	6.61284	6.87861	3.9485	4.03482	5.09372	5.27048	9.69473	9.84461	8.88296	9.02147	8.06108	8.18372	2.4621	2.51811	3.3413	3.38321	5.38933	5.46058	6.80665	6.91483	8.12684	8.23302	7.90086	7.92976	4.10592	4.03017	4.70292	4.62156	5.40166	5.31483	6.27336	6.19289	8.40599	8.61577	8.14585	8.17392	9.12206	9.4564	10.5833
2007-03-13	7.40514	7.97593	4.24209	4.71676	5.23581	5.58736	5.18729	5.76888	5.57426	6.06774	6.19079	6.8083	3.70894	3.94266	4.68503	5.03428	9.37159	9.61062	8.48908	8.86667	7.66063	8.0995	2.30108	2.50018	3.17376	3.42504	5.12091	5.48068	6.47622	6.84488	7.78754	8.1478	7.71593	8.01619	3.70554	4.02898	4.07524	4.50334	4.91854	5.30833	5.79739	6.18119	7.95129	8.47119	7.75586	8.39908	8.46839	9.16616	10.3132
2007-03-14	7.2763	7.4467	4.05254	4.23662	4.9763	5.17905	5.00408	5.20576	5.39594	5.58	5.95146	6.19115	3.68001	3.6716	4.7138	4.65324	9.4656	9.37611	8.45965	8.4354	7.52751	7.56311	2.19007	2.23741	2.9771	3.07378	4.89694	4.99903	6.34408	6.38608	7.69821	7.71474	7.46612	7.59231	3.61809	3.73881	4.02553	4.29535	4.82318	4.96207	5.71612	5.84465	7.85299	8.02026	7.3405	7.75455	8.41193	8.5835	10.2941
2007-03-15	7.52944	7.61092	4.28542	4.33897	5.17801	5.17506	5.2753	5.34354	5.63157	5.68055	6.25008	6.30421	3.80092	3.81217	4.86775	4.92943	9.54261	9.62239	8.64812	8.67183	7.78435	7.76232	2.32666	2.29985	3.17085	3.10582	5.15192	5.08292	6.56808	6.54511	7.90134	7.89228	7.70272	7.61102	3.75681	4.00187	4.2392	4.34878	4.98681	5.28201	5.8729	6.16201	7.96889	8.36299	7.53098	7.84122	8.55552	9.12645	10.431
2007-03-16	7.45603	7.84672	4.2419	4.56619	5.17906	5.38857	5.21362	5.60346	5.58591	5.90979	6.19799	6.59723	3.76336	3.96968	4.80026	5.12284	9.48679	9.71131	8.58594	8.91612	7.72473	8.1041	2.30405	2.48462	3.15021	3.37204	5.11614	5.43034	6.51921	6.84417	7.85008	8.16117	7.68152	7.93771	3.6241	4.32474	4.29328	4.69797	4.82501	5.66151	5.7113	6.52341	7.79472	8.5038	7.4351	8.30511	8.29056	9.24305	10.2772
2007-03-17	7.37602	8.48387	4.15965	5.16715	5.09405	5.69927	5.12183	6.23237	5.50335	6.41149	6.09132	7.19389	3.84135	4.31727	4.94991	5.76458	9.61585	10.1941	8.71541	9.45561	7.84022	8.66905	2.34587	2.79073	3.18057	3.69392	5.17589	5.88245	6.61398	7.35751	7.9511	8.62854	7.70692	8.24968	3.55865	4.93163	4.37968	5.42374	4.74989	6.37318	5.64215	7.1977	7.77854	8.77309	7.26317	8.46863	8.30804	9.64052	10.3206
2007-03-18	7.87798	8.97862	4.57399	5.64888	5.30495	6.14689	5.60688	6.77767	5.89365	6.89144	6.56118	7.80633	4.22958	4.53769	5.61139	6.02368	10.0883	10.3044	9.32249	9.79835	8.51769	9.15722	2.70205	3.05263	3.59185	4.07783	5.74624	6.38285	7.21769	7.78267	8.50595	9.01175	8.14518	8.72619	4.35898	5.1908	4.88881	5.64362	5.70331	6.67642	6.56537	7.48526	8.48213	8.99318	7.91438	8.87961	9.30203	9.89811	10.8828
2007-03-19	8.11509	9.31501	4.81563	6.019	5.59389	6.35208	5.8888	7.1206	6.15532	7.16536	6.90624	8.13024	4.23241	4.8398	5.48451	6.62207	9.91625	10.7325	9.32668	10.235	8.63817	9.61688	2.76645	3.37045	3.7567	4.40102	5.94218	6.80089	7.31134	8.23783	8.58694	9.38472	8.39783	9.00007	4.48515	5.58434	4.93031	6.00188	5.84729	7.12886	6.69898	7.90576	8.81123	9.23153	8.66639	9.13657	9.65569	10.2179	10.8859
2007-03-20	7.99747	9.66276	4.7024	6.38204	5.48846	6.6367	5.75944	7.4951	6.04143	7.48468	6.76083	8.52792	4.04363	5.10416	5.22713	6.99148	9.7729	10.9279	9.03206	10.6352	8.25198	10.1507	2.56172	3.67939	3.47573	4.81793	5.56933	7.34079	6.97327	8.7183	8.27954	9.80586	8.06104	9.48356	4.31382	6.00473	4.71796	6.44835	5.64669	7.61214	6.50891	8.35658	8.78643	9.4815	8.64476	9.49763	9.62078	10.5304	10.9218
2007-03-21	7.72578	9.63438	4.48288	6.33086	5.37874	6.64362	5.49823	7.47328	5.83136	7.47618	6.50782	8.52718	3.80328	5.06264	4.83001	6.88013	9.47686	10.8419	8.64358	10.5838	7.83199	10.1141	2.37275	3.63269	3.26011	4.78852	5.25037	7.30778	6.61719	8.66851	7.93008	9.77544	7.8193	9.48505	3.92298	5.8427	4.32749	6.40833	5.17856	7.43168	6.05214	8.19356	8.41437	9.4887	8.31195	9.60154	9.09437	10.5201	10.567
2007-03-22	7.39108	9.37245	4.18878	6.04705	5.14118	6.45983	5.14804	7.19968	5.53056	7.25129	6.12894	8.25502	3.66346	4.99886	4.66193	6.79227	9.40411	10.7958	8.42757	10.4867	7.52463	9.98407	2.2044	3.55848	3.01549	4.68748	4.93297	7.17659	6.34737	8.55205	7.68913	9.67282	7.51864	9.36678	3.53704	5.32826	4.20133	5.95619	4.71988	6.83715	5.6083	7.63787	8.14451	9.5149	7.83123	9.5849	8.77002	10.5641	10.053
2007-03-23	7.69892	8.71026	4.41093	5.37869	5.20234	6.05777	5.42594	6.52417	5.74473	6.70197	6.37952	7.59372	4.11765	4.61617	5.46891	6.05722	10.0187	10.2698	9.14912	9.92319	8.27915	9.38142	2.57251	3.16624	3.40804	4.27679	5.50593	6.63731	7.00823	7.96957	8.31786	9.18292	7.92183	8.99806	4.0124	4.70817	4.67964	5.16532	5.29526	6.11058	6.17643	6.94986	8.4084	9.296	7.98256	9.42252	9.16613	10.257	10.3309
2007-03-24	8.4822	8.45703	5.16013	5.13097	5.72734	5.76618	6.23868	6.22787	6.42417	6.42835	7.21638	7.23363	4.6515	4.38077	6.27947	5.77604	10.5051	10.147	9.96243	9.55784	9.30503	8.86383	3.16049	2.88704	4.16609	3.87013	6.50001	6.10745	7.93572	7.51766	9.13509	8.77644	8.77608	8.49573	4.68047	4.63977	5.32597	5.21303	6.07977	6.03222	6.92183	6.87666	8.78203	9.12546	8.52686	9.11148	9.64136	10.0562	10.9657
2007-03-25	9.14445	8.62793	5.83717	5.29788	6.22426	5.89367	6.94016	6.40879	7.01471	6.58182	7.94564	7.42452	4.8803	4.36022	6.62066	5.73222	10.7009	10.1114	10.3077	9.52647	9.7495	8.83529	3.4215	2.87031	4.50603	3.85636	6.9414	6.08742	8.33975	7.4904	9.48736	8.75227	9.15944	8.48656	5.05676	4.66185	5.62415	5.31559	6.51922	6.05796	7.33665	6.90073	9.08928	8.9981	8.94743	8.96117	10.0354	9.88731	11.1673
2007-03-26	9.77797	8.68883	6.53824	5.35712	6.69614	5.94709	7.60857	6.47545	7.56808	6.64015	8.61843	7.49866	5.20438	4.38013	7.22575	5.7822	11.0933	10.1555	10.7612	9.55661	10.2664	8.85646	3.80115	2.88369	4.9204	3.86142	7.4599	6.09678	8.85612	7.51214	9.89837	8.77126	9.53386	8.48208	5.62019	4.64799	6.05982	5.25099	7.16901	6.04151	7.94275	6.8853	9.5755	8.93104	9.5205	8.83494	10.6695	9.80901	11.2383
2007-03-27	10.1667	8.2629	6.94761	4.963	7.02889	5.74851	8.03076	6.05752	7.93083	6.30753	9.07249	7.10349	5.41374	4.21367	7.51032	5.45897	11.2372	9.90207	11.0775	9.29745	10.6947	8.59979	4.04929	2.74603	5.25915	3.72867	7.89744	5.90502	9.24072	7.2777	10.2354	8.55641	9.9296	8.36425	6.05456	4.26362	6.61732	4.68619	7.66933	5.58439	8.40965	6.44557	9.90978	8.68613	10.0749	8.60915	11.0678	9.46655	10.5216
2007-03-28	9.93406	7.71388	6.64211	4.46905	6.89119	5.36173	7.79668	5.48334	7.75269	5.81739	8.87229	6.48935	5.29164	3.87444	7.24864	4.93601	11.0609	9.54844	10.9196	8.75809	10.5333	7.96644	3.89943	2.43505	5.1177	3.33931	7.72902	5.36264	9.06151	6.73084	10.1074	8.0401	9.83391	7.91368	5.69077	3.79199	6.41948	4.12976	7.25806	5.02364	8.03288	5.90353	9.85258	8.35548	10.1179	8.16671	10.9741	9.03377	11.276
2007-03-29	9.14253	7.82786	5.79763	4.53406	6.35704	5.31274	6.97538	5.56632	7.08027	5.86742	8.06042	6.53545	4.87703	4.03806	6.49932	5.30441	10.5667	9.88705	10.3194	9.02703	9.84323	8.1643	3.43563	2.50668	4.59591	3.35026	7.06106	5.42262	8.39405	6.89998	9.55541	8.22112	9.33337	7.87828	5.17783	4.21076	5.87689	4.54303	6.66132	5.52885	7.47212	6.39929	9.43868	8.53997	9.66162	8.16771	10.4293	9.33542	11.2345
2007-03-30	8.74501	8.43095	5.41284	5.10748	5.98557	5.70568	6.53398	6.18899	6.6889	6.38608	7.55846	7.17272	4.63493	4.4523	6.1792	5.94314	10.403	10.2857	9.94618	9.664	9.33739	8.95118	3.15693	2.94569	4.20752	3.90992	6.55368	6.16489	7.94688	7.6067	9.15602	8.85139	8.86812	8.50866	5.0731	4.70974	5.62619	5.48799	6.53861	6.11346	7.35551	6.95392	9.29576	8.68998	9.30511	8.50242	10.2822	9.49855	11.2432
2007-03-31	9.37026	8.30009	6.10534	4.99531	6.35801	5.7669	7.16868	6.09426	7.19311	6.33741	8.15187	7.13968	4.787	4.61454	6.49144	6.16282	10.6322	10.4018	10.1655	9.91372	9.55976	9.28577	3.6925	2.84181	4.7468	3.86215	7.22925	6.08103	8.66482	7.43455	9.33751	9.11596	8.98784	8.81178	5.85413	4.4829	5.9556	5.74001	7.43293	5.84446	8.18464	6.69634	9.73956	8.46025	9.72384	8.3111	10.878	9.17013	11.4386
2007-04-01	9.26813	8.27057	5.92482	4.95041	6.43557	5.6129	7.10415	6.02659	7.18541	6.25424	8.18737	7.01402	4.83606	4.52359	6.50381	5.97545	10.6067	10.2581	10.249	9.77835	9.70746	9.15306	3.62032	2.79601	4.82996	3.72551	7.36641	5.92093	8.68058	7.36962	9.45158	9.00606	9.16238	8.74971	5.53692	4.74124	6.17935	5.79995	7.08016	6.15027	7.8674	6.98851	9.6004	8.78701	9.87042	8.43015	10.6373	9.67163	11.3097
2007-04-02	8.20868	8.84097	4.93165	5.52167	5.77192	5.99742	6.01805	6.61905	6.28385	6.74545	7.08184	7.6143	4.21949	4.60987	5.38728	6.19228	9.78775	10.4404	9.2982	9.9026	8.68702	9.24558	2.81249	3.1179	3.86775	4.12591	6.06349	6.44791	7.35728	7.87552	8.61255	9.08644	8.55669	8.74589	4.31027	5.13737	5.14365	5.78683	5.63418	6.6125	6.4873	7.42468	8.7657	9.26166	8.91695	9.15366	9.5212	10.2613	10.6447
2007-04-03	7.59875	8.656	4.3584	5.32593	5.25765	6.0055	5.35648	6.46348	5.70548	6.64788	6.34627	7.52412	3.91868	4.47305	5.06414	5.85924	9.68833	10.1601	8.83741	9.70164	7.98976	9.09012	2.42192	3.00755	3.27955	4.06049	5.31074	6.35238	6.744	7.71211	8.07182	8.95163	7.82309	8.74172	3.85621	4.75245	4.63808	5.38012	5.10468	6.16171	5.98737	6.99875	8.3691	8.96838	8.11504	9.06322	9.06913	9.81567	10.6236
2007-04-04	7.77264	8.06598	4.48608	4.77803	5.28724	5.58906	5.51226	5.84571	5.82386	6.12375	6.48308	6.87095	4.08225	4.07095	5.32167	5.22734	9.86164	9.73865	9.0948	9.07098	8.29295	8.34275	2.57765	2.61885	3.47286	3.57635	5.57624	5.69096	7.01003	7.054	8.31809	8.3457	8.04226	8.19375	3.96288	4.22466	4.59148	4.75016	5.23193	5.53859	6.11096	6.40263	8.38494	8.56082	8.07635	8.43272	9.10475	9.30499	10.6928
2007-04-05	7.82278	8.13163	4.5558	4.81772	5.40918	5.51949	5.58893	5.88233	5.90337	6.13354	6.59394	6.86527	4.08387	4.19004	5.28465	5.54085	9.8074	10.038	9.09512	9.26205	8.3318	8.45081	2.60341	2.66367	3.53135	3.54885	5.64398	5.68807	7.04306	7.15613	8.34351	8.45142	8.12683	8.1019	3.89587	4.63335	4.84272	5.12243	5.14976	6.0242	6.02872	6.86914	8.4739	8.75863	8.18856	8.45717	9.22277	9.61997	10.6965
2007-04-06	8.25997	9.09637	4.94125	5.81854	5.55434	6.13252	6.00145	6.87341	6.22167	6.94118	6.96348	7.83802	4.44058	4.81846	5.9833	6.62243	10.3435	10.748	9.64017	10.1963	8.87919	9.54707	2.91952	3.3445	3.84074	4.34699	6.07575	6.72804	7.55468	8.18454	8.79813	9.33051	8.39653	8.91727	4.39537	5.63869	5.23822	6.11685	5.74577	7.18716	6.60546	7.95737	8.96817	9.50349	8.66526	9.3312	9.90646	10.5968	11.1664
2007-04-07	9.07548	9.74377	5.76877	6.46991	6.16371	6.70037	6.86468	7.58152	6.94887	7.55727	7.86218	8.61721	4.78222	5.16974	6.45256	7.1051	10.593	10.9982	10.1633	10.7289	9.57786	10.2633	3.31198	3.75654	4.3769	4.90784	6.77482	7.45441	8.17746	8.82714	9.35033	9.89503	9.0279	9.57231	5.41145	6.04947	5.94956	6.60128	6.92624	7.66435	7.71457	8.40677	9.53523	9.80507	9.48615	9.99007	10.615	10.9267	11.5287
2007-04-08	9.23131	9.48313	5.90272	6.15498	6.34973	6.56052	7.04903	7.32181	7.12355	7.35888	8.09645	8.39238	4.74936	5.10291	6.35579	6.93915	10.5101	10.8747	10.1199	10.6444	9.5549	10.1931	3.28307	3.67941	4.36843	4.8499	6.76435	7.38715	8.14452	8.74033	9.32935	9.83787	9.04749	9.55456	5.29124	5.75502	5.72703	6.36362	6.79331	7.32866	7.59704	8.099	9.51789	9.67289	9.69008	9.88297	10.547	10.7466	11.4141
2007-04-09	8.85242	9.19717	5.51484	5.87052	6.11008	6.31557	6.65988	7.01049	6.80588	7.08877	7.71312	8.05128	4.56287	5.15332	6.03286	7.09356	10.2918	10.9975	9.83879	10.7013	9.23044	10.2198	3.08893	3.73748	4.14241	4.87478	6.46569	7.41021	7.84321	8.79189	9.06768	9.86099	8.81535	9.526	4.97048	5.48974	5.55208	6.02216	6.41845	7.02334	7.24268	7.81122	9.51352	9.49229	9.57353	9.62885	10.5643	10.52	11.4586
2007-04-10	8.69726	9.54714	5.36617	6.27878	5.94524	6.51922	6.48214	7.36392	6.64391	7.36501	7.5016	8.37122	4.55104	5.30165	6.07188	7.33023	10.3505	11.1341	9.81646	10.9165	9.15903	10.4915	3.05959	3.91414	4.06973	5.09327	6.37373	7.68781	7.78997	9.04786	9.01541	10.0753	8.70114	9.75663	5.01893	5.77026	5.58691	6.26223	6.47492	7.34252	7.29547	8.10534	9.43435	9.61829	9.55099	9.67047	10.4463	10.7053	11.3667
2007-04-11	8.81036	9.20612	5.47974	5.86056	6.02054	6.4044	6.59936	7.04267	6.74083	7.13719	7.61978	8.13103	4.58627	4.95909	6.10338	6.61777	10.3562	10.6337	9.87215	10.4446	9.24552	10.0062	3.10398	3.52823	4.14042	4.71907	6.46553	7.22197	7.86347	8.54039	9.08266	9.68466	8.79356	9.47548	5.0801	5.30931	5.61628	5.83042	6.54641	6.81484	7.36308	7.61766	9.50402	9.57529	9.54088	9.74476	10.5563	10.6245	11.4402
2007-04-12	8.29834	8.89951	5.00196	5.57134	5.7994	6.07732	6.10183	6.69103	6.34962	6.81569	7.15965	7.71012	4.17297	4.74739	5.35039	6.38585	9.79284	10.5464	9.22893	10.1127	8.56628	9.52284	2.74036	3.27479	3.75265	4.33748	5.92032	6.72387	7.24976	8.12366	8.52118	9.30588	8.41066	8.99251	4.41133	5.19336	4.9769	5.71345	5.75509	6.67568	6.60816	7.48485	9.01494	9.50943	9.18307	9.60519	9.86251	10.5515	10.9617
2007-04-13	8.41879	8.96134	5.09882	5.62962	5.66775	6.14177	6.16817	6.76153	6.36157	6.87986	7.13602	7.79389	4.27381	4.71703	5.70175	6.30836	10.158	10.4828	9.38892	10.0706	8.58283	9.49136	2.74245	3.24675	3.62974	4.32059	5.7982	6.70185	7.28041	8.08729	8.56002	9.27891	8.17536	8.99274	4.65768	5.28353	5.08339	5.7594	6.05131	6.78058	6.89519	7.58432	9.00211	9.4621	8.81065	9.55713	9.92787	10.4881	11.1437
2007-04-14	9.30337	9.11548	6.01963	5.79704	6.32321	6.22469	7.10249	6.91572	7.14361	7.00078	8.09702	7.93484	4.84026	4.74549	6.62143	6.39033	10.7315	10.553	10.236	10.1088	9.61894	9.51289	3.37105	3.27146	4.40263	4.32867	6.80308	6.71227	8.23929	8.11653	9.3863	9.2984	9.00278	8.97805	5.36526	5.34485	5.86134	5.98893	6.87463	6.85144	7.66935	7.65054	9.51826	9.42999	9.43913	9.50014	10.5984	10.4502	11.5129
2007-04-15	9.33822	9.58091	6.00545	6.3121	6.4512	6.54975	7.16818	7.40111	7.22965	7.39767	8.23294	8.41282	4.95443	4.95998	6.69527	6.78168	10.7249	10.8129	10.4255	10.4189	9.92457	9.86703	3.51011	3.51094	4.64364	4.59593	7.12179	7.05422	8.48866	8.46022	9.62445	9.58185	9.33773	9.23182	5.35553	5.95449	5.96654	6.49361	6.86698	7.54428	7.66546	8.29285	9.59809	9.67993	9.76679	9.72063	10.6551	10.7891	11.4707
2007-04-16	9.19171	10.1915	5.87091	7.00874	6.2952	7.02685	7.00017	8.05004	7.07549	7.93689	8.03051	9.06934	4.98708	5.37506	6.80292	7.52549	10.8156	11.2719	10.4635	10.9964	9.93647	10.55	3.54323	4.01181	4.64996	5.16119	7.12575	7.7579	8.51748	9.13764	9.63614	10.1214	9.30554	9.76186	5.29137	6.38264	6.07194	6.98897	6.79055	8.0406	7.59313	8.75445	9.6372	10.281	9.73564	10.4336	10.7213	11.5472	11.534
2007-04-17	8.9729	10.6249	5.6347	7.4932	6.18777	7.39341	6.78407	8.51787	6.90819	8.33373	7.83758	9.56035	4.7581	5.64977	6.31224	7.92544	10.4507	11.481	10.1388	11.3988	9.62018	11.0829	3.30612	4.34488	4.43288	5.59533	6.84709	8.31085	8.19092	9.62912	9.37726	10.54	9.15345	10.2441	5.16752	6.6164	5.84476	7.21398	6.64493	8.29511	7.45806	8.99694	9.58783	10.4855	9.74607	10.9204	10.6436	11.764	11.4788
2007-04-18	8.83531	10.7355	5.50408	7.5965	6.04269	7.49753	6.62674	8.6411	6.76484	8.44372	7.65033	9.70219	4.51631	5.62763	5.97877	7.84189	10.2693	11.42	9.7664	11.3859	9.12677	11.0918	3.03331	4.30905	4.06053	5.58496	6.35907	8.30964	7.75298	9.61421	8.98637	10.5477	8.7135	10.2769	5.04267	6.73411	5.69399	7.36763	6.49975	8.43661	7.32072	9.12231	9.33111	10.4484	9.45659	10.8776	10.3048	11.7178	11.0089
2007-04-19	9.00557	10.4957	5.68116	7.28486	6.14964	7.32005	6.80138	8.39091	6.90675	8.24383	7.82086	9.46777	4.53564	5.51189	6.04015	7.64587	10.3263	11.3064	9.79371	11.2249	9.13657	10.8933	3.04487	4.16606	4.05587	5.417	6.35513	8.1008	7.76794	9.42001	8.99687	10.3917	8.69031	10.1122	5.12476	6.5537	5.75107	7.20122	6.59567	8.23786	7.41018	8.94237	9.29969	10.1962	9.28959	10.627	10.2917	11.3937	10.3578
2007-04-20	9.05573	10.3774	5.72497	7.18117	6.21283	7.20359	6.86161	8.25759	6.96434	8.1227	7.89849	9.30949	4.645	5.48896	6.22543	7.63399	10.4486	11.3083	9.95827	11.1839	9.33035	10.8278	3.1611	4.1411	4.19398	5.36968	6.53668	8.03607	7.94756	9.36876	9.15256	10.3401	8.83456	10.0418	4.98735	6.37143	5.44049	7.12367	6.43447	8.03008	7.25971	8.74885	9.23176	10.2576	9.27303	10.5365	10.1885	11.498	10.6355
2007-04-21	9.14916	10.2791	5.83001	7.04878	6.255	7.13873	6.9528	8.15715	7.03335	8.04509	7.97633	9.22122	4.84151	5.40378	6.57539	7.45315	10.6815	11.1894	10.2471	11.0756	9.6633	10.7154	3.37578	4.03377	4.43873	5.26731	6.85344	7.91531	8.26494	9.24294	9.41962	10.2515	9.07549	9.97195	4.90303	6.23655	5.39796	6.85539	6.33625	7.87682	7.16641	8.60698	9.36799	10.3747	9.33116	10.7484	10.3893	11.6327	10.2079
2007-04-22	9.37574	10.5589	6.07098	7.44013	6.41987	7.32752	7.19119	8.44291	7.23137	8.26476	8.21809	9.46929	5.00978	5.6272	6.83561	7.94756	10.8335	11.5093	10.4977	11.3429	9.98149	10.9817	3.56965	4.32908	4.68503	5.53474	7.17112	8.21955	8.55827	9.56176	9.6717	10.4595	9.34563	10.1272	5.26458	6.68595	5.75986	7.30373	6.75892	8.37466	7.56109	9.05913	9.57088	10.4688	9.63343	10.8598	10.6403	11.7494	10.8391
2007-04-23	9.797	10.8425	6.55113	7.73318	6.71885	7.58221	7.63122	8.7541	7.59007	8.53573	8.64849	9.81184	5.19136	5.81703	7.16251	8.1881	11.0408	11.6225	10.7544	11.6341	10.282	11.3857	3.7829	4.55353	4.92565	5.85237	7.47371	8.63212	8.85363	9.9185	9.91024	10.7771	9.57339	10.5104	5.97544	6.711	6.50334	7.49514	7.57286	8.41575	8.31744	9.10576	9.88865	10.6196	9.99898	11.0443	11.05	11.9343	11.6493
2007-04-24	9.70119	10.6743	6.38813	7.49771	6.71774	7.46092	7.55082	8.58051	7.54857	8.40033	8.62343	9.65697	5.09213	5.75122	6.89849	8.05251	10.8396	11.5404	10.633	11.5552	10.1937	11.3005	3.6685	4.46438	4.85111	5.76565	7.39067	8.53253	8.73323	9.82054	9.83748	10.7112	9.5725	10.451	5.74837	6.36825	6.3875	7.06169	7.32066	8.02867	8.09314	8.74959	9.82763	10.2535	10.1076	10.7801	10.9383	11.4514	11.5889
2007-04-25	9.16192	10.4255	5.82338	7.21773	6.33	7.25463	6.98447	8.31304	7.07775	8.17469	8.04792	9.37899	4.71564	5.70132	6.25058	7.98749	10.4151	11.509	10.0737	11.4793	9.53618	11.1961	3.25896	4.40511	4.37034	5.68305	6.76503	8.42561	8.11573	9.72762	9.3105	10.6291	9.08122	10.3528	5.11837	6.18301	5.77691	6.94714	6.59105	7.81486	7.40631	8.54976	9.65482	10.1951	9.8362	10.4691	10.7283	11.4188	11.4919
2007-04-26	9.22572	10.4161	5.92127	7.23069	6.28901	7.23191	7.02725	8.29791	7.08869	8.15495	8.03756	9.34739	4.75491	5.75054	6.44795	8.08783	10.6097	11.5699	10.1164	11.5391	9.49367	11.2613	3.27632	4.47122	4.30819	5.74814	6.68413	8.50089	8.111	9.80151	9.28535	10.6796	8.92742	10.3988	5.49601	6.59654	6.11131	7.36408	7.02412	8.27597	7.8071	8.96844	9.49017	10.4583	9.62946	10.7911	10.5166	11.7447	11.2011
2007-04-27	10.2301	10.4665	7.11461	7.2812	7.02653	7.27741	8.07989	8.35331	7.9453	8.20347	9.06191	9.40903	5.40058	5.72935	7.6307	8.02066	11.3497	11.5238	11.0078	11.5233	10.5306	11.2582	4.0548	4.43775	5.16898	5.73101	7.7518	8.48849	9.15051	9.78144	10.1053	10.678	9.7115	10.4126	6.36163	6.71108	6.88335	7.46423	8.01061	8.39772	8.72098	9.10495	10.1989	10.4684	10.201	10.9261	11.4655	11.7389	11.2518
2007-04-28	10.8651	10.5706	7.76854	7.41656	7.59783	7.35472	8.77698	8.46196	8.55285	8.29034	9.83055	9.51095	5.81648	5.76916	8.21092	8.1256	11.6408	11.5925	11.6226	11.5615	11.3591	11.2858	4.5587	4.49649	5.84139	5.77307	8.61149	8.52961	9.90562	9.82946	10.7556	10.6986	10.476	10.4164	7.12759	6.68341	7.73441	7.41604	8.86726	8.3591	9.51103	9.07774	10.7237	10.5626	11.1581	10.9621	12.0625	11.8665	12.1729
2007-04-29	11.4114	10.8523	8.50739	7.77091	8.05096	7.58053	9.35458	8.7605	9.02255	8.53493	10.3877	9.80411	6.12601	6.04562	8.77406	8.63469	11.9474	11.8749	12.0023	11.9029	11.8131	11.6905	4.98217	4.87203	6.29509	6.17339	9.14369	8.99994	10.3935	10.2645	11.1053	11.011	10.8496	10.7443	7.61926	6.87896	8.24932	7.54604	9.41605	8.58523	10.017	9.26724	10.965	10.6769	11.4855	11.1471	12.3487	11.9996	11.3332
2007-04-30	11.7807	10.8698	8.89367	7.74042	8.3887	7.61552	9.76046	8.7875	9.37683	8.56985	10.8361	9.86026	6.38858	6.04042	9.16829	8.5203	12.1402	11.7939	12.3597	11.9535	12.2851	11.8069	5.32193	4.83069	6.71536	6.2057	9.66258	9.07717	10.8474	10.3132	11.472	11.1069	11.2815	10.8914	7.64667	6.85275	8.34761	7.54133	9.45168	8.56954	10.0592	9.24946	10.8138	10.5951	11.4486	11.1064	12.1483	11.8913	12.1612
2007-05-01	12.0819	10.9504	9.31772	7.88106	8.65706	7.66605	10.0802	8.86692	9.63937	8.62574	11.1489	9.91694	6.56363	6.10171	9.45331	8.70709	12.2781	11.909	12.5749	11.9878	12.5599	11.8078	5.56351	4.93915	6.99002	6.26695	9.98801	9.12078	11.1314	10.369	11.6827	11.1031	11.5282	10.8554	7.94775	7.36359	8.61944	8.05494	9.77424	9.12341	10.3429	9.74765	10.9559	10.7483	11.4391	11.1804	12.3418	12.0933	12.4414
2007-05-02	12.2678	12.0729	9.50616	9.46378	8.82868	8.64976	10.2852	10.0548	9.81958	9.59676	11.3783	11.0697	6.70259	6.86232	9.66709	10.0298	12.378	12.527	12.7511	12.7928	12.7907	12.7921	5.75184	6.06787	7.2126	7.43901	10.2557	10.4368	11.3624	11.5007	11.8602	11.8386	11.7404	11.7233	8.39742	8.50386	9.00284	9.20217	10.2612	10.3505	10.7886	10.8613	11.2758	11.3922	11.8753	11.8784	12.7147	12.8603	12.5023
2007-05-03	12.128	13.2027	9.2939	10.8212	8.70353	9.72245	10.1383	11.2802	9.70092	10.6544	11.2396	12.388	6.71499	7.55605	9.66352	10.9795	12.3759	12.9186	12.788	13.6528	12.8491	13.9647	5.75505	7.00496	7.23886	8.5848	10.3001	11.8217	11.4006	12.6493	11.908	12.736	11.7998	12.853	8.48958	9.65606	9.04582	10.408	10.367	11.5688	10.8963	11.9745	11.3643	11.9976	12.0862	12.7471	12.8091	13.5364	12.5658
2007-05-04	12.1168	13.7165	9.32669	11.433	8.69043	10.219	10.1214	11.8372	9.67943	11.1387	11.2045	12.9948	6.81855	7.80072	9.86146	11.2962	12.4665	13.0499	12.8775	13.9747	12.9492	14.4103	5.92199	7.32245	7.39446	8.99264	10.4626	12.3262	11.5389	13.069	11.9792	13.0798	11.8835	13.2844	8.29841	9.81378	8.80848	10.5638	10.1663	11.7744	10.714	12.1861	11.2713	12.0848	11.9999	13.0551	12.6973	13.6263	12.4498
2007-05-05	12.3249	14.1108	9.60776	11.9589	8.88065	10.6186	10.3438	12.2572	9.86504	11.5025	11.4289	13.4456	6.82775	7.98201	9.83533	11.5421	12.4555	13.1307	12.931	14.1339	13.0372	14.6263	5.90779	7.59623	7.42013	9.2878	10.5184	12.655	11.5883	13.3176	12.0526	13.2353	11.9735	13.5057	8.45937	10.1838	8.99911	10.8992	10.3258	12.1218	10.8533	12.4972	11.5033	12.3317	12.1469	13.2054	12.9788	13.9015	12.238
2007-05-06	12.1529	13.517	9.30194	10.9504	8.72794	9.99119	10.1676	11.646	9.72938	10.9946	11.2789	12.8471	6.64228	7.57164	9.51964	10.8979	12.3062	12.9269	12.7223	13.8976	12.7772	14.3387	5.63945	6.89718	7.13192	8.63864	10.188	12.0048	11.3023	12.8512	11.8562	13.0559	11.7425	13.2017	8.28113	9.40276	8.91885	10.2211	10.1488	11.3764	10.7015	11.8386	11.3778	12.2682	12.2087	13.3448	12.8151	13.8278	11.8555
2007-05-07	11.6365	12.2921	8.6398	9.3945	8.27471	8.86109	9.61416	10.3265	9.26767	9.87669	10.7186	11.4753	6.34113	6.90638	9.00692	9.89552	12.0481	12.4825	12.3556	13.0876	12.32	13.2693	5.22221	5.9778	6.66954	7.5632	9.64405	10.725	10.8203	11.7663	11.5057	12.2389	11.3432	12.202	7.69707	8.19009	8.3577	8.99365	9.52598	10.0479	10.1269	10.6545	11.0221	11.5362	11.7353	12.5909	12.3963	12.9834	11.8428
2007-05-08	11.3815	11.8661	8.37725	8.99607	8.04247	8.46538	9.3337	9.85287	9.02254	9.45536	10.4079	10.933	6.31784	6.61108	9.05267	9.48555	12.083	12.2909	12.2708	12.6704	12.1718	12.7031	5.22563	5.60506	6.60499	7.07792	9.53085	10.1155	10.7315	11.2401	11.3849	11.7976	11.1806	11.6708	7.59193	7.77614	8.2585	8.52302	9.39618	9.57516	9.99968	10.1991	10.9209	11.1718	11.4928	11.8611	12.2889	12.5814	11.1428
2007-05-09	11.9686	11.7641	9.24287	8.83896	8.55141	8.37869	9.95116	9.74647	9.52038	9.371	10.9907	10.8359	6.64007	6.49265	9.60871	9.29389	12.3513	12.1977	12.6361	12.5228	12.6232	12.514	5.69008	5.44298	7.10186	6.89196	10.1008	9.894	11.2288	11.0464	11.7265	11.6523	11.5772	11.5009	8.15653	7.59838	8.81353	8.31329	9.99798	9.38255	10.5422	10.0216	11.2982	11.2249	11.8343	11.8624	12.7465	12.6506	12.2237
2007-05-10	12.7654	11.3905	10.2337	8.34426	9.29706	8.06175	10.8122	9.34927	10.2557	9.04468	11.8992	10.4452	7.02181	6.34591	10.1945	9.04407	12.6098	12.0716	13.088	12.3434	13.2152	12.2903	6.22592	5.24013	7.71645	6.66677	10.8247	9.62873	11.8412	10.8111	12.1769	11.4807	12.1291	11.3056	8.69338	7.36021	9.29704	8.0804	10.5831	9.13443	11.0791	9.7716	11.6433	11.0993	12.3709	11.8037	13.1355	12.4917	12.8821
2007-05-11	12.6547	11.767	9.92313	8.97533	9.18571	8.36753	10.7096	9.73511	10.1892	9.33952	11.8448	10.7713	6.98552	6.64276	10.061	9.63551	12.5585	12.3631	13.1425	12.6158	13.3218	12.5866	6.11405	5.7088	7.67813	7.10003	10.8362	10.0845	11.8608	11.214	12.273	11.6951	12.2405	11.5384	8.68043	8.01288	9.36897	8.70966	10.5883	9.83046	11.0912	10.3893	11.6804	11.3499	12.5168	11.9236	13.1715	12.8045	12.3179
2007-05-12	12.634	12.2504	10.0234	9.50472	9.16944	8.81224	10.6748	10.2644	10.1433	9.79908	11.7673	11.3495	6.96286	6.88132	10.0783	9.93763	12.563	12.5016	13.0551	12.9759	13.1839	13.0871	6.12047	5.99499	7.628	7.5008	10.7414	10.6019	11.7757	11.6589	12.1588	12.0878	12.103	12.0155	8.95036	8.20304	9.69029	8.96922	10.8579	10.0575	11.3293	10.6167	11.8869	11.5054	12.6647	12.2645	13.4112	12.9727	12.9646
2007-05-13	12.2341	12.8459	9.35142	10.3644	8.80594	9.37702	10.2607	10.8962	9.81642	10.3247	11.3956	11.9803	6.65784	7.19342	9.49234	10.4634	12.2884	12.7181	12.7822	13.259	12.8787	13.4356	5.63468	6.48445	7.17256	7.99172	10.2621	11.1331	11.3629	12.0923	11.9395	12.3394	11.8506	12.3384	8.24803	8.66834	8.94602	9.31299	10.142	10.5456	10.6955	11.0433	11.6036	11.8522	12.5668	12.5677	13.0719	13.3746	12.6393
2007-05-14	12.0392	12.9194	9.24181	10.2884	8.6191	9.43285	10.0363	10.9921	9.6056	10.4254	11.1116	12.1303	6.67549	7.39774	9.66075	10.7213	12.3751	12.8341	12.6823	13.5625	12.6848	13.8581	5.73718	6.73197	7.15938	8.33526	10.1709	11.5744	11.289	12.4698	11.7741	12.6703	11.6347	12.7425	7.89624	8.66025	8.61426	9.62148	9.72221	10.5619	10.3075	11.0727	11.477	11.9945	12.2111	12.9104	12.9412	13.5267	11.8348
2007-05-15	12.3954	13.0209	9.72022	10.5399	8.94622	9.5396	10.4176	11.0896	9.92459	10.4952	11.4982	12.1978	6.86163	7.51621	9.91163	10.9041	12.4897	12.9012	12.9473	13.6648	13.0478	13.9895	5.97062	6.91763	7.46801	8.52543	10.5603	11.7809	11.6232	12.6312	12.0571	12.7642	11.9782	12.8714	7.92625	8.94794	8.65255	9.85281	9.75639	10.8494	10.3339	11.3224	11.6106	12.2905	12.3571	13.1439	13.0964	13.8569	12.8404
2007-05-16	12.8748	13.6347	10.3574	11.378	9.40001	10.1486	10.9318	11.744	10.3597	11.0546	12.0299	12.8844	7.06551	7.75814	10.2528	11.247	12.6357	13.024	13.149	13.8961	13.2992	14.2994	6.2813	7.27902	7.78915	8.91947	10.9159	12.2248	11.9188	12.9783	12.2422	12.9911	12.209	13.1797	8.57053	9.57453	9.21345	10.4042	10.4339	11.5011	10.9417	11.9171	11.7284	12.591	12.5305	13.5859	13.2291	14.1804	12.9183
2007-05-17	12.9414	13.7759	10.3445	11.4303	9.45515	10.2619	11.0131	11.9096	10.4399	11.2069	12.1437	13.0891	7.02489	7.88716	10.1274	11.4093	12.588	13.0943	13.1834	14.0793	13.3727	14.5546	6.17301	7.43905	7.73988	9.13595	10.9054	12.4993	11.9193	13.2101	12.3109	13.1899	12.2867	13.4256	8.6217	9.69361	9.28801	10.6006	10.5213	11.6526	11.034	12.0643	11.7302	12.6367	12.5754	13.7354	13.2286	14.2298	12.9026
2007-05-18	12.7595	13.778	10.119	11.4913	9.28428	10.2756	10.8164	11.9056	10.2717	11.1993	11.9356	13.0725	6.92517	7.82917	10.0014	11.323	12.5303	13.0699	13.0328	14.0492	13.1633	14.5169	6.05346	7.33988	7.57228	9.0437	10.6889	12.4074	11.7332	13.1467	12.1466	13.1673	12.0869	13.3833	8.40846	9.93309	9.1495	10.8201	10.2948	11.8736	10.8234	12.2735	11.5252	12.5238	12.3789	13.6265	12.9884	14.1081	12.7478
2007-05-19	12.3856	14.0423	9.58982	11.8555	8.9388	10.5453	10.4188	12.1859	9.94211	11.441	11.5404	13.3705	6.68844	8.02742	9.57314	11.6046	12.3305	13.142	12.7964	14.1414	12.8822	14.6349	5.69194	7.67916	7.2109	9.35893	10.2926	12.7199	11.3921	13.3542	11.939	13.2347	11.8435	13.5231	8.07102	10.4281	8.8713	11.3709	9.93184	12.3742	10.495	12.7283	11.326	12.7419	12.0819	13.7237	12.7602	14.34	12.6378
2007-05-20	12.1087	13.9342	9.28464	11.6154	8.68495	10.4145	10.1159	12.0816	9.67965	11.3568	11.2107	13.2774	6.71141	7.89826	9.70202	11.398	12.3941	13.1123	12.7409	14.1889	12.7679	14.7153	5.77747	7.40351	7.22088	9.16377	10.2528	12.5799	11.3596	13.3033	11.8397	13.3272	11.7145	13.57	7.98428	10.3098	8.80005	11.057	9.79511	12.8656	10.4294	13.3779	11.2529	12.6189	11.9463	13.8171	12.6786	14.2105	12.6074
2007-05-21	12.2976	12.9242	9.58981	10.1702	8.85538	9.43515	10.3127	11.0096	9.83642	10.4565	11.3909	12.1894	6.91174	7.45256	10.0017	10.7581	12.5292	12.8609	12.9925	13.7024	13.1011	14.0636	6.04999	6.76378	7.54516	8.43576	10.6426	11.7345	11.692	12.6168	12.0955	12.8382	12.0253	12.9386	8.36592	9.10567	9.11995	9.80326	10.1958	11.5429	10.7935	12.176	11.554	12.0147	12.1958	13.1525	13.0377	13.5386	12.8364
2007-05-22	12.6177	12.3957	9.99028	9.67363	9.15357	8.94622	10.6585	10.4226	10.131	9.93514	11.7541	11.5192	6.9455	7.26266	10.0291	10.5149	12.5429	12.7517	13.0613	13.4241	13.2022	13.6775	6.07923	6.53123	7.60593	8.1173	10.7311	11.3276	11.7694	12.269	12.1768	12.5363	12.1238	12.5697	8.62919	8.68347	9.32591	9.34208	10.7359	11.0798	11.4261	11.7396	11.6978	11.8238	12.5186	12.6698	13.1926	13.3361	12.8295
2007-05-23	12.5004	13.0392	9.75532	10.6409	9.04323	9.5678	10.5405	11.1014	10.0421	10.498	11.6594	12.1905	6.77623	7.56652	9.73369	10.9973	12.408	12.9228	12.8875	13.6527	12.9902	13.9632	5.82395	7.02594	7.34379	8.60084	10.4397	11.8348	11.5207	12.6565	12.0195	12.7329	11.9356	12.853	8.32416	9.41457	9.0259	10.0389	10.1774	11.8248	10.826	12.4053	11.622	12.1436	12.4557	12.9567	13.1036	13.6966	12.8316
2007-05-24	12.0661	13.6448	9.18857	11.3378	8.65051	10.1474	10.0746	11.7607	9.65172	11.0727	11.1847	12.9132	6.59907	7.87335	9.46447	11.3971	12.2807	13.0827	12.657	14.0351	12.6867	14.4914	5.58766	7.43438	7.05953	9.11048	10.0945	12.4555	11.2217	13.1661	11.7851	13.1375	11.6564	13.3678	7.74328	10.2755	8.43944	10.9436	9.60692	12.7068	10.3649	13.2142	11.3986	12.6569	12.2106	13.5655	12.8418	14.2493	12.673
2007-05-25	11.7812	13.597	8.86446	11.1902	8.39316	10.085	9.76438	11.7184	9.3853	11.0431	10.8525	12.8875	6.58281	7.66968	9.46654	11.0756	12.2835	12.9886	12.6135	13.9423	12.6177	14.383	5.58031	7.07532	7.02548	8.7895	10.0394	12.1455	11.1753	12.9533	11.7291	13.0783	11.5857	13.2455	7.6285	9.9723	8.27351	10.7248	9.40562	12.4249	10.1139	12.9743	11.3448	12.8404	12.0445	13.9698	12.7879	14.4462	12.677
2007-05-26	11.8811	13.1228	9.04122	10.5334	8.4763	9.62385	9.86622	11.2128	9.46231	10.6151	10.9364	12.3662	6.5362	7.26323	9.36587	10.4784	12.2331	12.7426	12.5763	13.4801	12.5819	13.768	5.50305	6.49825	6.9598	8.12769	9.97429	11.371	11.1169	12.3136	11.7044	12.6138	11.5613	12.6583	7.92885	9.51291	8.60926	10.1823	9.75785	11.9363	10.4678	12.5239	11.3422	12.5268	12.0615	13.7345	12.783	14.1102	12.6672
2007-05-27	12.4172	13.112	9.78589	10.6472	8.96771	9.62618	10.4374	11.1886	9.93659	10.5809	11.5067	12.3051	6.79169	7.23963	9.85519	10.5042	12.4617	12.742	12.8053	13.3592	12.8389	13.581	5.90982	6.5217	7.34203	8.07391	10.377	11.2554	11.4633	12.2024	11.8891	12.4571	11.7746	12.4773	8.35788	9.52958	9.10613	10.1777	10.214	11.9787	10.7422	12.5563	11.5212	12.3488	12.208	13.3723	12.9966	13.9182	12.8126
2007-05-28	13.5491	13.3684	11.3596	10.957	10.0846	9.87182	11.6417	11.4664	10.9604	10.8211	12.7569	12.6047	7.49329	7.51824	10.9148	10.9181	12.8783	12.9008	13.5131	13.638	13.7657	13.9486	6.95383	6.93667	8.47449	8.52553	11.6573	11.766	12.4972	12.6118	12.5745	12.7285	12.6667	12.8342	9.39912	9.60142	10.0438	10.2564	11.3041	12.0693	11.8615	12.6402	11.9422	12.403	12.6853	13.395	13.4748	13.9778	13.0852
2007-05-29	14.5716	13.4979	12.5942	11.1146	11.1054	9.99675	12.7413	11.6066	11.9264	10.9425	13.9729	12.7561	8.13031	7.7637	11.7349	11.2501	13.1772	13.0294	14.2128	13.9201	14.7339	14.334	7.83923	7.27757	9.52492	8.93033	12.8987	12.2463	13.4797	13.0009	13.3021	13.0201	13.6318	13.2112	10.7607	9.43457	11.2961	10.4464	13.0086	11.3549	13.4899	11.8076	12.5118	12.4581	13.366	13.4853	14.0951	14.0374	13.4164
2007-05-30	15.2536	13.7353	13.432	11.4569	11.8123	10.2376	13.4642	11.8574	12.5707	11.1562	14.7896	13.0165	8.51253	7.79583	12.1942	11.2797	13.335	13.052	14.6187	14.0057	15.3047	14.4567	8.36285	7.2964	10.1531	8.98815	13.6437	12.3389	14.0555	13.0898	13.7292	13.1209	14.2119	13.325	11.4968	10.4368	12.017	10.874	13.8155	13.2433	14.2401	13.8673	13.2323	12.5069	14.1797	13.5402	14.8395	14.0902	13.8038
2007-05-31	15.2001	14.1945	13.2199	12.0821	11.6929	10.7079	13.4348	12.3445	12.5399	11.5781	14.7575	13.5385	8.23446	7.91464	11.8446	11.4542	13.2827	13.0997	14.5735	14.0644	15.2434	14.5305	7.90639	7.66826	9.75623	9.34486	13.2786	12.7024	13.8625	13.3399	13.7265	13.1641	14.0893	13.4095	10.6219	11.2103	10.9738	11.2278	13.0678	13.8894	13.5719	14.5936	13.0962	12.6884	14.4872	13.7063	14.7197	14.2842	13.6296
2007-06-01	14.8944	14.3657	12.8947	12.218	11.3993	10.8576	13.1007	12.538	12.2444	11.7503	14.381	13.7618	8.1419	7.94537	11.7476	11.4817	13.1975	13.1265	14.2822	14.1653	14.8313	14.6747	7.84733	7.58682	9.57386	9.34534	12.9844	12.7706	13.5703	13.4424	13.3848	13.2838	13.7165	13.5408	10.5389	11.2958	11.3656	11.5244	12.5133	13.9962	12.9904	14.7081	13.0687	12.5869	14.1742	13.7439	14.6824	14.1761	13.6815
2007-06-02	14.6691	14.4925	12.5786	12.4308	11.1579	11.002	12.8653	12.6665	12.0377	11.8612	14.1239	13.8959	8.15589	8.12278	11.7579	11.7245	13.225	13.1843	14.3858	14.2433	14.978	14.7767	7.80873	7.81189	9.58009	9.51599	13.0284	12.9049	13.6338	13.4989	13.51	13.3408	13.8444	13.6658	10.5885	11.3891	11.352	11.6973	12.7794	14.079	13.2921	14.7786	12.998	12.7189	14.2426	13.7193	14.6138	14.3162	13.6088
2007-06-03	14.7361	14.331	12.7499	12.1214	11.2561	10.8088	12.9241	12.5073	12.0881	11.7261	14.1802	13.737	8.3365	8.12151	11.9858	11.7107	13.2652	13.2133	14.4366	14.3694	15.0477	14.9565	8.12118	7.75061	9.86451	9.5253	13.3026	12.9735	13.7945	13.5975	13.5377	13.4974	13.9488	13.8188	11.0974	10.3273	11.4965	11.4916	13.9212	12.33	14.4078	12.8238	12.9631	12.6419	14.1084	13.813	14.5748	14.2354	13.6089
2007-06-04	15.266	13.9804	13.4521	11.6958	11.8278	10.4645	13.4762	12.1288	12.5817	11.3961	14.8036	13.3236	8.73178	7.9467	12.435	11.4815	13.3965	13.1286	14.7852	14.1759	15.5455	14.69	8.67995	7.50673	10.5048	9.23698	14.0394	12.6332	14.33	13.3265	13.8983	13.2969	14.4783	13.5545	12.0877	10.7582	12.4065	11.2463	14.8608	13.5838	15.389	14.2056	13.236	12.6422	14.3255	13.688	14.8514	14.2354	13.773
2007-06-05	15.6865	13.9704	13.9162	11.7399	12.247	10.4674	13.9285	12.1116	12.9864	11.3777	15.3214	13.2942	8.93925	7.85555	12.6774	11.3621	13.4925	13.0816	15.052	14.0653	15.9222	14.5374	8.94032	7.38387	10.8489	9.08585	14.4696	12.4505	14.6786	13.1774	14.1883	13.1805	14.8505	13.4054	12.3248	10.7571	12.7637	10.9439	15.1495	13.4485	15.6757	14.2035	13.3686	12.7201	14.6133	13.8061	14.9931	14.3186	13.8006
2007-06-06	15.9106	13.9985	14.1841	11.7461	12.4847	10.4886	14.163	12.1452	13.1997	11.4087	15.5953	13.3361	9.04307	7.69529	12.7831	11.1291	13.5176	13.0017	15.1284	13.9296	16.0348	14.3584	9.08647	7.13494	11.0135	8.82665	14.6566	12.1675	14.8053	12.9611	14.2671	13.0529	14.9774	13.2248	12.2117	10.6875	12.5882	10.9685	15.0378	13.365	15.5694	14.1263	13.4595	12.8422	14.6806	13.9257	15.0826	14.4472	13.8646
2007-06-07	15.3394	14.0327	13.3148	11.8129	11.8069	10.5281	13.5954	12.1792	12.6821	11.4368	14.9423	13.3686	8.769	7.80263	12.5138	11.3083	13.4953	13.0445	15.0631	13.9354	15.9251	14.3525	8.64602	7.34637	10.5913	8.99187	14.2335	12.3053	14.5801	13.0396	14.2228	13.0294	14.7958	13.2339	11.4986	10.6538	11.868	10.9235	14.3627	13.4069	14.9523	14.1066	13.2211	12.803	14.5862	13.9714	14.8486	14.4073	13.7057
2007-06-08	14.8727	14.2892	12.892	12.1801	11.3861	10.7974	13.0738	12.4486	12.2206	11.6699	14.3492	13.6556	8.58415	7.98512	12.2841	11.5423	13.3816	13.1375	14.7482	14.1637	15.4853	14.669	8.43998	7.58776	10.276	9.29531	13.8112	12.6761	14.2063	13.3432	13.8734	13.2719	14.3809	13.5432	11.2919	10.8429	11.5179	11.1269	14.1055	13.5902	14.702	14.281	13.0985	12.7361	14.2849	13.8575	14.7161	14.3359	13.6797
2007-06-09	15.2952	14.8058	13.4874	12.8736	11.8584	11.3423	13.507	12.9921	12.6094	12.1485	14.839	14.2542	8.79536	8.2782	12.5085	11.9156	13.4243	13.2412	14.8626	14.3753	15.6551	14.9615	8.7612	8.04094	10.6098	9.76873	14.1691	13.1893	14.4333	13.7072	13.9821	13.4733	14.5877	13.8611	11.8677	11.339	12.0497	11.8503	14.5731	14.1427	15.2132	14.6225	13.267	13.2031	14.4116	14.1711	14.8856	14.8117	13.78
2007-06-10	15.645	14.9584	13.8526	12.9628	12.1957	11.4608	13.8883	13.1706	12.9488	12.3062	15.2732	14.4598	8.95306	8.4015	12.694	12.0679	13.4996	13.3222	15.0717	14.605	15.9497	15.2826	8.95706	8.16957	10.872	9.9807	14.4992	13.4817	14.7034	13.972	14.2098	13.7304	14.8772	14.1612	12.2553	11.244	12.4514	12.4636	14.9585	13.2498	15.5808	13.6728	13.6075	13.4956	14.7584	14.7356	15.2231	15.1196	13.9499
2007-06-11	15.1743	14.9599	13.1436	13.0089	11.6502	11.4792	13.4142	13.1652	12.5219	12.3015	14.7379	14.4509	8.49821	8.48354	12.1832	12.1635	13.4064	13.3352	14.8655	14.6237	15.6479	15.3103	8.23425	8.30987	10.1541	10.1091	13.7549	13.6056	14.2434	14.0407	14.0309	13.7394	14.4922	14.2075	11.5644	11.5015	11.9378	12.6857	14.4208	13.5055	15.0124	13.9114	13.5613	13.5548	14.9437	14.8249	15.1938	15.1801	13.8814
2007-06-12	14.7341	15.0956	12.6931	13.1763	11.2348	11.6193	12.93	13.3092	12.0939	12.4295	14.1916	14.6128	8.19358	8.56473	11.8093	12.2621	13.2336	13.3767	14.39	14.7364	14.9825	15.4682	7.87828	8.41022	9.63896	10.245	13.0813	13.7778	13.6625	14.1842	13.5071	13.8622	13.8567	14.3611	11.1148	12.1266	11.4138	12.4623	13.9318	14.8658	14.5571	15.5032	13.0822	13.4808	14.4712	14.7996	14.7051	15.1097	13.6004
2007-06-13	14.8988	15.4262	12.9555	13.6281	11.425	11.9867	13.0964	13.6489	12.2408	12.736	14.3727	15.0009	8.3399	8.66579	11.9916	12.3741	13.2775	13.3999	14.4759	14.7938	15.1021	15.5521	8.11134	8.56535	9.87347	10.4057	13.328	13.9498	13.8282	14.2956	13.5845	13.9164	13.9947	14.461	11.3635	12.0276	11.7138	12.3611	14.1576	14.7307	14.7535	15.3809	13.0849	13.3622	14.1779	14.6505	14.6985	14.989	13.6727
2007-06-14	15.5433	15.9126	13.8112	14.2125	12.1344	12.5039	13.7609	14.1569	12.8418	13.1982	15.1366	15.5946	8.85931	8.99767	12.5475	12.7092	13.3998	13.4666	14.8086	14.9957	15.5901	15.8539	8.88023	9.04972	10.6983	10.9283	14.2341	14.5257	14.4273	14.6669	13.9132	14.1176	14.5604	14.819	11.9808	12.4767	12.3823	12.8369	14.7674	15.1296	15.3112	15.7553	13.3333	13.4774	14.4931	14.6665	14.953	15.0982	13.779
2007-06-15	16.2898	16.3892	14.6629	14.7615	12.9188	13.0128	14.5419	14.6509	13.5574	13.6545	16.0629	16.1876	9.42142	9.24414	13.1077	12.9856	13.5631	13.5716	15.3219	15.2961	16.3416	16.2811	9.61522	9.35876	11.5909	11.333	15.2979	15.0291	15.1887	15.0658	14.4636	14.4443	15.3668	15.2469	12.7946	12.9583	13.1202	13.2733	15.5033	15.6024	16.055	16.2011	13.7268	13.7556	14.8651	14.9616	15.3375	15.3711	13.9879
2007-06-16	16.8132	16.511	15.2274	14.8469	13.4638	13.0975	15.0878	14.8002	14.0634	13.7779	16.7247	16.3412	9.77019	9.36093	13.4376	13.0967	13.6626	13.5987	15.6483	15.3865	16.8227	16.4158	10.052	9.51552	12.1374	11.5162	15.9613	15.2422	15.6628	15.2104	14.8183	14.54	15.8826	15.3979	13.3549	13.1447	13.8071	13.4916	16.0459	15.7996	16.5753	16.3904	14.1864	14.0818	15.388	15.3189	15.7774	15.6841	14.1926
2007-06-17	16.9031	16.1854	15.2862	14.4445	13.5141	12.7352	15.2061	14.4691	14.1549	13.4697	16.8337	15.941	9.78326	9.17406	13.5175	12.9583	13.732	13.6132	15.8044	15.3858	17.0253	16.3911	10.0513	9.22478	12.1875	11.242	16.0573	14.9724	15.8072	15.0992	14.9927	14.5536	16.0406	15.3055	13.2924	12.9474	13.7324	13.3177	16.0435	15.6399	16.5729	16.2385	14.2377	13.9825	15.6937	15.4648	15.8536	15.6136	14.1857
2007-06-18	16.7181	15.9886	15.0859	14.2555	13.3222	12.5542	15.0125	14.2506	13.9762	13.2766	16.6005	15.6938	9.69055	8.98063	13.4177	12.7303	13.6939	13.5193	15.6922	15.1251	16.8648	16.0239	9.93811	8.98617	12.0369	10.9199	15.8683	14.5653	15.6588	14.7646	14.8699	14.2693	15.879	14.9457	13.2483	12.8739	13.6034	13.1585	15.8728	15.5555	16.4791	16.1522	13.9752	13.8586	15.4511	15.2032	15.606	15.4823	14.0672
2007-06-19	16.6244	15.9587	14.9877	14.2129	13.2287	12.5181	14.9122	14.2213	13.8852	13.249	16.4827	15.6581	9.64073	9.12454	13.3761	12.8516	13.6861	13.5205	15.6601	15.1498	16.8149	16.0731	9.87281	9.20916	11.9612	11.1366	15.7806	14.7846	15.6034	14.8719	14.8358	14.2851	15.8198	15.0386	13.1943	12.7685	13.5254	13.0236	15.8096	15.4606	16.4213	16.069	13.9333	13.9117	15.2447	15.2229	15.551	15.5303	14.0694
2007-06-20	16.4607	15.6855	14.7826	13.8403	13.0388	12.2067	14.7505	13.9448	13.7305	12.9952	16.279	15.3336	9.49193	8.90928	13.259	12.6763	13.6743	13.5451	15.5935	15.1936	16.7051	16.1105	9.66843	8.8431	11.7382	10.8195	15.533	14.4981	15.4624	14.776	14.7679	14.3583	15.6734	14.9902	13.4142	12.4648	13.8428	12.8102	15.8897	15.1691	16.5365	15.7999	14.0606	13.9222	15.3723	15.2809	15.6719	15.5448	14.099
2007-06-21	16.6621	15.7335	15.0748	13.9947	13.3164	12.3098	14.9248	13.9718	13.916	13.0283	16.5339	15.3754	9.6942	8.93414	13.3373	12.6488	13.6132	13.4554	15.5164	14.9576	16.6398	15.796	9.96421	8.95918	12.0059	10.8292	15.7867	14.4154	15.5061	14.597	14.6728	14.079	15.7115	14.7495	13.874	12.714	14.2575	12.9824	16.2851	15.361	16.91	15.9744	14.273	13.9427	15.5674	15.2753	15.8684	15.5619	14.214
2007-06-22	17.2247	16.1626	15.6656	14.4986	13.9127	12.7669	15.4998	14.4185	14.4617	13.4378	17.2589	15.9046	10.1139	9.17874	13.6821	12.9182	13.7001	13.5511	15.847	15.2339	17.1438	16.1907	10.4736	9.27275	12.6375	11.2283	16.5515	14.9042	16.0148	14.9748	15.0344	14.3777	16.2795	15.1511	14.2325	13.3126	14.5992	13.561	16.6474	15.8177	17.2547	16.4555	14.458	14.1158	15.8111	15.3967	16.0454	15.7206	14.2884
2007-06-23	17.3765	16.2865	15.7961	14.5923	14.0185	12.8619	15.6909	14.5654	14.6125	13.5625	17.4386	16.0622	10.1513	9.23149	13.829	12.9848	13.8079	13.5833	16.0891	15.3213	17.4581	16.3125	10.511	9.33327	12.7474	11.3182	16.727	15.0233	16.2524	15.0797	15.3016	14.4741	16.5301	15.2661	14.283	13.1223	14.673	13.3371	16.6942	15.6767	17.3041	16.3333	14.4911	14.1344	15.9237	15.5501	16.0856	15.7521	14.29
2007-06-24	17.392	16.1596	15.8302	14.4455	14.0744	12.7281	15.6803	14.4326	14.626	13.4411	17.4715	15.9053	10.1334	9.19207	13.748	12.9501	13.7465	13.5794	15.9521	15.3045	17.2807	16.2854	10.4949	9.27587	12.6901	11.2579	16.6325	14.9582	16.1199	15.0422	15.1502	14.4579	16.3901	15.2298	14.4275	12.8586	14.955	13.0054	16.7871	15.3939	17.3954	16.0683	14.5155	14.0231	15.9145	15.4314	16.1036	15.6458	14.3033
2007-06-25	17.5767	16.1038	16.0122	14.3907	14.2553	12.676	15.8776	14.3711	14.8059	13.3865	17.7074	15.8354	10.3277	9.14775	13.8614	12.9028	13.7529	13.5641	16.036	15.2597	17.428	16.2208	10.7235	9.21764	12.9592	11.1863	16.95	14.8722	16.29	14.9781	15.2427	14.4099	16.5904	15.1624	14.6253	12.9847	15.1608	13.3707	17.0099	15.4142	17.6017	16.1043	14.6526	14.0767	16.0086	15.3906	16.222	15.6873	14.3624
2007-06-26	17.5143	15.9838	15.9409	14.2267	14.1678	12.535	15.8294	14.252	14.7462	13.2749	17.6179	15.691	10.37	9.05796	13.9726	12.8171	13.8248	13.5497	16.2024	15.2111	17.6467	16.1463	10.7743	9.08701	13.059	11.0464	17.0951	14.719	16.4629	14.8832	15.4256	14.3617	16.7717	15.0704	14.6866	12.9287	15.1812	13.3516	17.0971	15.38	17.6825	16.0732	14.7992	13.9486	16.1891	15.4028	16.3577	15.5785	14.4122
2007-06-27	17.2152	16.0982	15.6173	14.4208	13.836	12.6957	15.5328	14.3529	14.4573	13.3766	17.2293	15.8249	10.0919	9.13944	13.8156	12.8717	13.8283	13.5313	16.113	15.1785	17.477	16.1127	10.4326	9.22528	12.6736	11.1626	16.6538	14.8202	16.2432	14.9049	15.3292	14.317	16.517	15.0752	14.3482	13.5348	14.7306	14.0479	16.8236	15.9019	17.4198	16.5551	14.7409	13.9743	16.2534	15.2612	16.3227	15.5877	14.381
2007-06-28	16.8401	16.6343	15.2069	15.0475	13.4377	13.2902	15.1462	14.8944	14.0954	13.8888	16.7537	16.499	9.78184	9.52396	13.5272	13.1937	13.7428	13.5802	15.8279	15.3904	17.0552	16.4473	10.0461	9.74873	12.1901	11.7469	16.0668	15.4794	15.8269	15.3044	15.0191	14.5367	16.0626	15.4913	13.8438	13.9547	14.2574	14.3917	16.3383	16.3582	16.9618	16.9867	14.4147	14.1241	15.9963	15.4463	16.0327	15.7327	14.2452
2007-06-29	16.9889	17.1976	15.4249	15.6363	13.6679	13.8801	15.2566	15.475	14.2322	14.4355	16.9543	17.2222	9.9735	9.92814	13.5528	13.5496	13.6572	13.6771	15.7062	15.7327	16.9364	16.9608	10.3072	10.2498	12.4203	12.3677	16.2809	16.2296	15.8182	15.8195	14.8795	14.9092	16.0604	16.0575	14.076	14.2149	14.4303	14.5306	16.4763	16.5943	17.0911	17.2101	14.5974	14.3164	15.8112	15.6264	16.1527	15.9103	14.3542
2007-06-30	17.5094	17.2569	15.9504	15.6626	14.2097	13.8812	15.7907	15.5751	14.7395	14.4975	17.6306	17.2827	10.4183	9.94012	13.882	13.6609	13.7331	13.7724	16.0282	15.9421	17.4384	17.23	10.8237	10.2482	13.0677	12.4311	17.0727	16.3511	16.3243	16.0122	15.2353	15.142	16.6415	16.264	14.6683	14.1453	15.1571	14.7575	17.0247	16.5793	17.6162	17.1951	15.1735	14.3662	16.3406	15.7897	16.6474	15.9696	14.5472
2007-07-01	17.7183	17.2922	16.152	15.7329	14.398	13.9802	16.0258	15.571	14.9443	14.5276	17.8903	17.3455	10.5804	10.0819	14.0982	13.6511	13.8379	13.6889	16.3073	15.812	17.8249	17.0928	11.0155	10.4358	13.3503	12.5873	17.4448	16.4884	16.658	15.9674	15.5422	14.9958	17.0032	16.2268	15.0019	14.3339	15.6666	14.8967	17.3697	16.6974	17.9463	17.3082	15.4162	14.5006	16.8799	15.8248	16.9055	16.0805	14.609
2007-07-02	17.3764	17.8727	15.7746	16.2924	13.9866	14.6192	15.7104	16.1293	14.6155	15.096	17.4318	18.1355	10.2513	10.5785	13.9732	13.9385	13.8834	13.7187	16.285	16.0583	17.727	17.5132	10.6256	10.9934	12.926	13.2667	16.968	17.3103	16.4789	16.423	15.5176	15.2714	16.7761	16.7738	14.7402	14.8807	15.4342	15.4445	17.1957	17.1918	17.7742	17.7831	15.1873	14.8445	16.8293	16.1107	16.7377	16.3793	14.5281
2007-07-03	16.921	18.3785	15.3064	16.7678	13.5338	15.1113	15.2242	16.6641	14.1721	15.5933	16.8564	18.7938	9.88167	10.9439	13.6109	14.2534	13.7605	13.8293	15.8974	16.4262	17.1622	18.0585	10.1744	11.3961	12.3419	13.8123	16.2449	18.008	15.9418	16.9268	15.0938	15.6801	16.187	17.3508	14.372	15.2499	15.0052	15.7138	16.8198	17.5733	17.4177	18.1488	14.7979	15.1707	16.4146	16.5025	16.3881	16.6731	14.3926
2007-07-04	17.1596	18.4495	15.6036	16.8459	13.8553	15.1627	15.4258	16.7579	14.3978	15.6627	17.1782	18.8686	10.057	10.9575	13.6217	14.3667	13.6759	13.9057	15.7755	16.5901	17.0414	18.2657	10.4066	11.4315	12.5458	13.8876	16.4345	18.116	15.922	17.0893	14.9556	15.8577	16.1772	17.5088	14.5339	15.3569	15.0957	15.8138	16.9121	17.6878	17.5083	18.2583	14.8411	15.3153	16.1615	16.7534	16.3845	16.8151	14.4296
2007-07-05	17.7063	18.1189	16.1427	16.5418	14.4185	14.7799	15.9875	16.4607	14.932	15.3384	17.8923	18.3988	10.4076	10.6126	13.9096	14.2338	13.7587	13.9319	16.0775	16.5159	17.4979	18.094	10.8146	11.0585	13.0699	13.4517	17.0836	17.5981	16.3654	16.866	15.289	15.7707	16.68	17.2166	14.9348	15.0025	15.5975	15.3645	17.2776	17.4308	17.8611	18.0029	15.1772	15.1482	16.4685	16.7554	16.6719	16.6981	14.5418
2007-07-06	17.9662	17.8289	16.3936	16.2616	14.6691	14.5255	16.2666	16.1285	15.1867	15.0545	18.225	18.0424	10.5939	10.4682	14.0681	13.9828	13.8098	13.7919	16.2537	16.1694	17.7608	17.6268	11.0267	10.8856	13.3497	13.1718	17.4355	17.2162	16.614	16.4786	15.484	15.3902	16.9626	16.8038	15.043	14.8205	15.657	15.2786	17.4282	17.1926	18.0017	17.7785	15.2926	15.0348	16.7781	16.4933	16.8036	16.5758	14.5649
2007-07-07	17.8479	17.9457	16.2763	16.3735	14.5116	14.6518	16.1741	16.2425	15.0715	15.1673	18.0502	18.2004	10.5321	10.5949	14.1086	14.0694	13.8653	13.8104	16.3467	16.2553	17.8636	17.763	10.9632	11.0279	13.3029	13.3515	17.3977	17.4377	16.6723	16.6159	15.5848	15.4857	17.0085	16.9648	14.8156	15.1148	15.4074	15.8458	17.2567	17.4464	17.8303	18.0233	15.1982	15.1773	16.725	16.536	16.7289	16.6833	14.5338
2007-07-08	17.9031	18.152	16.3262	16.5612	14.6368	14.8811	16.1731	16.435	15.1254	15.5193	18.1648	18.4892	10.5673	10.7506	14.0247	14.1483	13.7866	13.8148	16.1954	16.323	17.6818	17.8838	10.9944	11.195	13.2994	13.5567	17.3679	17.6886	16.5475	16.7477	15.42	15.5628	16.8919	17.1287	15.0329	15.5323	15.6023	16.2605	17.3693	17.8248	17.948	18.3942	15.2646	15.3894	16.6435	16.7575	16.7616	16.8659	14.5639
2007-07-09	18.4037	18.5074	16.773	16.861	15.1557	15.2622	16.6669	16.7679	15.6196	15.7791	18.8502	18.9947	10.8461	10.9867	14.1629	14.2535	13.7949	13.8169	16.3178	16.4167	17.9002	18.0572	11.2877	11.4342	13.6632	13.8557	17.8161	18.0605	16.7827	16.9348	15.5599	15.6714	17.1872	17.3708	15.4116	15.8697	15.9582	16.5176	17.7371	18.1359	18.3039	18.7007	15.4804	15.5898	16.8314	16.957	16.9396	17.0342	14.6316
2007-07-10	18.3883	18.6549	16.8033	17.0397	15.0542	15.3611	16.7388	16.9766	15.6004	16.9965	18.7514	19.1347	10.7401	11.0068	14.3127	14.4114	13.9423	13.9221	16.5848	16.6429	18.2088	18.3432	11.2043	11.4865	13.6294	13.9625	17.8126	18.212	16.9889	17.1604	15.8474	15.9162	17.3619	17.5895	15.3484	15.9435	15.9397	16.6077	17.7484	18.258	18.3062	18.8112	15.5364	15.6652	17.0356	17.1352	17.0136	17.1163	14.6436
2007-07-11	17.7481	18.4164	16.1726	16.8145	14.3962	15.131	16.08	16.7223	14.9746	15.6503	17.9155	18.826	10.3937	10.8864	14.0197	14.2966	13.8531	13.878	16.2706	16.5057	17.7378	18.1437	10.802	11.3512	13.1077	13.7765	17.1634	17.9732	16.5367	16.979	15.5006	15.7643	16.8502	17.3849	14.94	15.7518	15.5349	16.4272	17.3756	18.0982	17.9467	18.651	15.3189	15.7106	16.9394	17.1362	16.8487	17.1457	14.5724
2007-07-12	17.5228	18.2549	15.9577	16.6713	14.1977	14.9478	15.8235	16.5761	14.7534	15.9591	17.6365	18.5954	10.3149	10.7237	13.8965	14.2489	13.7868	13.8994	16.1024	16.4891	17.5088	18.0851	10.7097	11.1812	12.962	13.5799	16.9662	17.7396	16.345	16.8923	15.3155	15.7427	16.644	17.2631	14.8499	15.3881	15.4759	16.04	17.2353	17.7885	17.8156	18.3462	15.1416	15.5467	16.648	17.1782	16.6765	17.0458	14.5214
2007-07-13	17.8004	18.3124	16.2312	16.6923	14.5263	15.0634	16.0738	16.5753	15.0244	15.6424	18.0242	18.7259	10.5529	10.7702	13.9742	14.1309	13.7538	13.7958	16.1217	16.2909	17.5863	17.8484	10.9734	11.2107	13.2582	13.5679	17.3089	17.6981	16.4719	16.7254	15.3396	15.5285	16.8149	17.1124	15.1237	15.426	15.8266	15.9745	17.4632	17.7205	18.0389	18.2936	15.2993	15.5135	16.6188	16.907	16.7809	16.9751	14.5797
2007-07-14	18.2349	18.5772	16.6339	16.9585	14.9709	15.2973	16.5132	16.8815	15.452	15.7891	18.6058	19.0457	10.8621	10.8817	14.1929	14.288	13.8113	13.8733	16.3578	16.4941	17.9538	18.1281	11.3087	11.3452	13.6959	13.7671	17.8598	17.9605	16.8277	16.966	15.6037	15.7516	17.2343	17.3713	15.4164	15.5874	16.1528	16.177	17.7397	17.9174	18.3073	18.4791	15.5202	15.6913	16.9041	17.0557	16.979	17.1179	14.6421
2007-07-15	18.4852	18.174	16.8652	16.5941	15.2171	14.8225	16.7739	16.5282	15.699	15.3908	18.9356	18.4638	11.0007	10.5515	14.335	14.2051	13.8697	13.9352	16.5317	16.5007	18.2034	18.0617	11.4653	10.9871	13.9149	13.3704	18.143	17.504	17.0513	16.8229	15.7959	15.7538	17.4844	17.1638	15.5927	15.2721	16.3882	15.9403	17.9139	17.6869	18.4762	18.2472	15.7064	15.5015	17.0691	17.1911	17.1301	17.0173	14.6945
2007-07-16	18.6487	17.7874	16.9976	16.2214	15.3932	14.4846	16.9241	16.0846	15.8782	15.0121	19.1725	17.9889	11.0905	10.4028	14.3567	13.9276	13.8588	13.7762	16.5429	16.1111	18.2393	17.5381	11.55	10.8065	14.0176	13.0696	18.2702	17.0892	17.0983	16.3927	15.8112	15.3256	17.5546	16.7056	15.8479	15.2343	16.5991	15.9065	18.107	17.562	18.6739	18.1362	15.9409	15.3682	17.254	16.8069	17.3123	16.8603	14.7553
2007-07-17	18.7787	18.0922	17.1272	16.4989	15.5106	14.8337	17.072	16.3607	15.988	15.3117	19.3316	18.4216	11.1579	10.8216	14.4303	14.0558	13.8906	13.7658	16.6344	16.2002	18.3694	17.7176	11.6268	11.1256	14.1264	13.45	18.4116	17.5463	17.2136	16.6073	15.9122	15.4282	17.6826	16.98	16.0409	15.5256	16.7597	16.1122	18.3262	17.8239	18.8825	18.3931	15.9911	15.5053	17.5001	16.8823	17.3929	16.9652	14.7678
2007-07-18	18.9112	18.3633	17.187	16.766	15.6735	15.0766	17.1557	16.6691	16.1256	15.5769	19.5684	18.7545	11.3193	11.2731	14.416	14.2688	13.8395	13.8783	16.5886	16.4829	18.353	18.1007	11.7548	11.2864	14.2755	13.6972	18.5989	17.876	17.2298	16.9309	15.87	15.738	17.7499	17.3233	16.1463	15.6372	16.8626	16.3531	18.3904	17.9651	18.9535	18.5253	16.0692	15.5267	17.4043	17.0377	17.4205	17.0075	14.787
2007-07-19	19.0479	18.2182	17.3848	16.6364	15.7621	14.9107	17.3667	16.5383	16.2521	15.4338	19.6731	18.5471	11.3544	11.9819	14.6039	14.205	13.9555	13.8813	16.8435	16.4357	18.6771	18.0089	11.8394	11.1335	14.4199	13.5135	18.7911	17.6542	17.4935	16.8239	16.1448	15.6839	18.0036	17.1874	16.0751	15.4745	16.82	16.2547	18.3896	17.8416	18.9396	18.4015	16.0273	15.2794	17.6008	16.9136	17.4354	16.8167	14.777
2007-07-20	18.7474	18.0527	17.1064	16.4772	15.4732	14.7512	17.048	16.3607	15.9581	15.2716	19.2811	18.335	11.2196	12.31	14.4924	14.1043	13.916	13.8333	16.7106	16.3068	18.479	17.8297	11.6957	11.0418	14.2229	13.3796	18.5367	17.4784	17.3117	16.6685	15.9965	15.542	17.7929	17.0184	15.901	15.2214	16.5224	15.9289	18.1943	17.6057	18.7535	18.1723	15.858	15.2262	17.3913	16.6324	17.2883	16.7333	14.7328
2007-07-21	18.599	18.0706	16.9839	16.4918	15.3118	14.7813	16.9121	16.3685	15.809	15.2893	19.067	18.367	11.0263	12.5754	14.4497	14.1199	13.9435	13.8208	16.6945	16.3057	18.4122	17.8437	11.5119	11.1125	14.003	13.4588	18.2665	17.5706	17.2178	16.6971	15.9727	15.5421	17.6494	17.061	15.7677	15.1572	16.3502	15.7047	18.0946	17.5212	18.6516	18.0927	15.7791	15.2361	17.2654	16.7318	17.214	16.7567	14.7122
2007-07-22	18.4406	18.2479	16.8359	16.6483	15.157	14.9801	16.7455	16.5305	15.6531	15.4644	18.8598	18.6193	10.8811	12.2856	14.2844	14.1884	13.8709	13.8336	16.4889	16.374	18.1215	17.9548	11.344	11.2322	13.7646	13.6107	17.9569	17.7592	16.9608	16.8095	15.746	15.6188	17.3661	17.196	15.5525	15.2774	16.1176	15.7089	17.914	17.614	18.4708	18.1855	15.6633	15.3884	17.2161	16.7187	17.1301	16.8583	14.6789
2007-07-23	18.5042	18.4724	16.873	16.8526	15.2462	15.2057	16.7813	16.7594	15.7178	15.6856	18.9732	18.92	10.9647	12.5268	14.2759	14.2532	13.8389	13.8383	16.4541	16.4334	18.0983	18.0603	11.4198	11.3685	13.8459	13.7814	18.0516	17.9711	16.9621	16.9214	15.711	15.687	17.39	17.3372	15.6621	15.483	16.1717	16.0678	17.9466	17.7884	18.5137	18.3581	15.7812	15.55	17.0835	16.9753	17.1799	17.0116	14.7148
2007-07-24	18.471	18.6546	16.8774	17.0018	15.1594	15.3997	16.8048	16.929	15.6819	15.8668	18.8754	19.1815	10.8453	12.9069	14.3565	14.3335	13.9363	13.8409	16.6115	16.5085	18.2662	18.1984	11.3193	11.5503	13.7643	14.0117	17.973	18.2606	17.0612	17.0677	15.8782	15.7745	17.4546	17.5283	15.6983	15.7143	16.2937	16.335	18.0494	17.9926	18.603	18.5601	15.874	15.5669	17.3616	17.0504	17.2926	17.0364	14.7378
2007-07-25	18.2571	18.9832	16.6615	17.2255	14.9812	15.752	16.5485	17.2113	15.4732	16.1983	18.6238	19.6881	10.7873	13.4166	14.1689	14.4065	13.8177	13.8059	16.3429	16.5634	17.9173	18.3528	11.2336	11.8427	13.6056	14.3835	17.7493	18.7411	16.7821	17.2478	15.5853	15.8493	17.1709	17.8093	15.6953	16.079	16.2543	16.8373	17.9972	18.271	18.5601	18.8475	15.9556	15.8214	17.3173	17.0465	17.3341	17.1972	14.7592
2007-07-26	18.5739	19.3072	16.9049	17.5616	15.3382	16.0434	16.8209	17.5871	15.7896	16.5135	19.1005	20.074	11.0778	13.6529	14.269	14.6825	13.8025	13.9337	16.4211	16.9124	18.0851	18.84	11.5162	12.1035	13.9552	14.7598	18.1848	19.232	16.9748	17.6736	15.6797	16.2332	17.4359	18.2732	15.9042	16.3499	16.4778	17.1281	18.1603	18.5753	18.7269	19.1381	16.1279	16.1007	17.4734	17.4496	17.4699	17.4488	14.8014
2007-07-27	18.8615	19.2643	17.2099	17.5	15.5851	16.0112	17.1664	17.5243	16.0689	16.4735	19.4327	20.0389	11.1189	13.6806	14.4919	14.6878	13.9455	13.9442	16.7329	16.9223	18.4815	18.8439	11.6043	12.0813	14.1186	14.7326	18.4102	19.1956	17.2919	17.6721	16.0168	16.2421	17.7441	18.2598	15.9994	16.3164	16.5883	17.0269	18.2813	18.5839	18.84	19.1375	16.1765	16.1291	17.6436	17.6184	17.5346	17.501	14.8143
2007-07-28	18.5972	19.3977	16.9893	17.5742	15.299	16.1503	16.922	17.633	15.8068	16.6098	19.0537	20.2558	10.8319	11.7272	14.3316	14.6077	13.9245	13.8734	16.5796	16.8097	18.2219	18.7303	11.2966	12.1207	13.7312	14.7715	17.9296	19.2531	17.0228	17.5922	15.8431	16.1275	17.4129	18.225	15.9266	16.3476	16.5072	17.0904	18.219	18.5751	18.7779	19.1376	16.0763	16.1536	17.6051	17.541	17.4663	17.4994	14.7899
2007-07-29	18.3157	19.5414	16.725	17.7337	15.0211	16.2781	16.6277	17.8061	15.5337	16.7486	18.6849	20.4183	10.588	11.8357	14.1388	14.7676	13.8666	13.9512	16.37	17.0128	17.9052	19.0087	11.0267	12.2587	13.3786	14.9723	17.488	19.5138	16.7197	17.8335	15.6107	16.3497	17.0658	18.4814	15.6749	16.3993	16.2267	17.2071	18.0137	18.6446	18.5723	19.2017	15.9182	16.2624	17.4686	17.6275	17.3413	17.5816	14.749
2007-07-30	18.4391	19.4383	16.7999	17.6681	15.195	16.1724	16.6977	17.7167	15.7102	16.6442	18.9034	20.2578	10.7483	11.773	14.078	14.7651	13.7647	13.9623	16.2181	17.0133	17.7526	18.9931	11.1801	12.214	13.517	14.9139	17.6288	19.4347	16.6468	17.813	15.4491	16.3468	17.0316	18.4395	15.7065	16.3847	16.2457	17.1427	17.9644	18.6192	18.5363	19.1792	15.8947	16.2887	17.3128	17.7464	17.2959	17.6226	14.7437
2007-07-31	18.881	19.4149	17.1701	17.5758	15.64	16.1695	17.1324	17.6419	16.0938	16.6282	19.5187	20.2906	11.1516	11.7975	14.301	14.681	13.8048	13.905	16.4536	16.9017	18.1438	18.8619	11.6855	12.2085	14.1616	14.8948	18.4507	19.4167	17.0268	17.7018	15.7177	16.2294	17.5149	18.3555	15.9258	16.4993	16.3983	17.296	18.1858	18.6659	18.7511	19.2405	15.9214	16.3912	17.3842	17.6828	17.3266	17.6673	14.7505
2007-08-01	19.1602	19.5693	17.4186	17.7728	15.9077	16.3005	17.4239	17.8455	16.4008	16.7748	19.8901	20.4424	11.4835	11.8222	14.4933	14.786	13.8519	13.9653	16.6754	17.0376	18.502	19.0357	12.0589	12.2827	14.6986	15.0094	19.1516	19.5608	17.6235	17.8961	15.971	16.3753	17.9392	18.4947	16.0862	16.5529	16.747	17.1294	18.3166	18.7925	18.8841	19.3478	16.0747	16.4815	17.3725	17.8975	17.4171	17.7663	14.788
2007-08-02	19.2321	19.3309	17.4913	17.6082	15.9729	16.055	17.5059	17.6326	17.5928	16.5344	19.9774	20.0811	11.5919	11.6523	14.6703	14.7687	13.9412	13.9909	16.9024	17.0288	18.8099	18.9814	12.0478	12.127	14.6875	14.8044	19.1365	19.289	17.6393	17.7865	16.2189	16.357	18.217	18.3718	16.2254	16.3892	16.9628	17.1053	18.4521	18.6365	19.0172	19.1932	16.0831	16.5075	17.6325	17.8845	17.476	17.7779	14.7913
2007-08-03	19.3206	18.9005	17.5019	17.2699	16.0784	15.5987	17.5492	17.237	17.4498	16.2325	20.1569	19.454	11.7577	11.2482	14.5649	14.6552	13.8413	14.0209	16.753	16.9394	18.6684	18.7701	12.1234	11.7591	14.7703	14.3421	19.2562	18.7019	17.5444	17.5442	16.069	16.2441	18.1945	18.0194	16.3551	16.1229	17.0948	16.9256	18.5567	18.4394	19.1251	18.9877	16.1999	16.3843	17.4466	17.9648	17.5062	17.7253	14.8166
2007-08-04	19.5486	18.4749	17.7283	16.8704	16.288	15.1866	17.8055	16.7857	20.6215	19.3977	20.4383	18.9009	12.0138	11.6	14.7717	14.3391	13.9223	13.9071	17.0122	16.5683	19.0517	18.2231	12.3711	11.3637	15.1227	13.8048	19.723	18.0146	17.8866	17.0408	16.3592	15.8323	18.5948	17.4457	16.5351	15.7791	17.2374	16.5691	18.7104	18.1177	19.2821	18.6721	16.4457	16.1564	17.7462	17.7135	17.7121	17.5371	14.8727
2007-08-05	19.46	18.5057	17.6993	16.8708	16.1888	15.2509	17.7484	16.7787	20.5064	18.3443	20.2756	18.9793	12.4787	10.9685	14.9273	14.2387	14.0451	13.8118	17.2212	16.3993	19.2735	18.0312	12.3413	11.4146	15.1017	13.8291	19.6784	18.0264	18.0536	16.9107	16.5733	15.652	18.6899	17.3428	16.5882	15.6732	17.326	16.3339	18.802	17.9853	19.3625	18.5472	16.5567	16.0117	17.9276	17.5233	17.815	17.4102	14.8988
2007-08-06	18.9788	18.8326	17.3543	17.1314	15.6596	15.5911	17.3365	17.0858	16.2104	19.4234	19.5401	19.4497	11.3668	11.3116	14.735	14.3776	14.0418	13.8163	17.0275	16.5373	18.9084	18.2877	11.8834	11.7363	14.5061	14.245	18.9104	18.559	17.677	17.1762	16.3432	15.8148	18.1783	17.6984	16.2655	16.0072	17.0116	16.6104	18.5801	18.2063	19.1251	18.7828	16.4051	16.2506	18.0154	17.396	17.7483	17.524	14.8704
2007-08-07	18.2393	19.0742	16.6589	17.367	14.9164	15.8139	16.5738	17.3546	19.1764	20.1394	18.5644	19.7516	11.1738	11.4622	14.3856	14.6126	13.9493	13.9342	16.6478	16.8393	18.3173	18.6988	11.3482	11.9285	13.8055	14.5288	18.0266	18.9297	17.1063	17.5295	15.9182	16.145	17.5041	18.0718	15.7113	16.3716	16.2978	17.1286	18.0801	18.573	18.632	19.141	15.9124	16.5375	17.7003	17.855	17.382	17.7878	14.744
2007-08-08	18.2451	18.96	16.6256	17.3025	15.0028	15.6785	16.4989	17.2723	19.2962	19.922	18.6434	19.5595	10.8661	11.3169	14.1729	14.5888	13.7999	13.9552	16.3308	16.8288	17.918	18.6497	11.2962	11.8038	13.6758	14.3743	17.8327	18.733	16.798	17.4647	15.5742	16.1275	17.2037	17.9651	15.5827	16.2154	16.2765	17.0218	17.8803	18.5279	18.4482	19.0747	15.7381	16.4107	17.1385	18.0369	17.1636	17.7562	14.7026
2007-08-09	18.7874	18.5965	17.0904	16.9909	15.5479	15.294	17.0381	16.9255	19.825	19.5158	19.3902	19.0487	11.3179	11.0133	14.3018	14.4664	13.7688	13.9599	16.4357	16.7237	18.1606	18.4454	11.7193	11.5022	14.1927	13.9982	18.491	18.2642	17.0729	17.24	15.706	16.0039	17.6025	17.6673	15.9973	15.7722	16.7	16.4217	18.1854	18.1166	18.7646	18.6703	16.033	16.0346	17.2505	17.7046	17.3666	17.4605	14.7773
2007-08-10	19.1002	18.2534	17.3721	16.6687	15.8474	14.9512	17.3666	16.5703	19.9132	18.0962	19.8037	18.5971	11.6179	10.7761	14.6523	14.2469	13.9365	13.8788	16.8814	16.4657	18.7762	18.068	12.0188	11.235	14.6479	13.6348	19.0848	17.8001	17.6076	16.8937	16.1949	15.7183	18.1775	17.2759	16.3936	15.4917	17.134	16.1041	18.5849	17.8445	19.1552	18.4064	16.2008	15.8299	17.6459	17.3303	17.5495	17.2588	14.8199
2007-08-11	19.2656	18.3951	17.4711	16.7533	16.0218	15.1575	17.5038	16.6447	19.3997	18.411	20.068	18.8526	12.0518	10.9495	14.6006	14.1926	13.8906	13.7854	16.8069	16.3372	18.6993	17.9494	12.0435	11.3868	14.6704	13.7843	19.1161	17.9663	17.5537	16.8431	16.1185	15.5844	18.1502	17.2738	16.4809	15.6602	17.1823	16.2794	18.7127	17.9227	19.2714	18.4943	16.3158	15.8873	17.6208	17.269	17.6108	17.2826	14.8442
2007-08-12	19.4582	18.8592	17.6617	17.1698	16.1988	15.609	17.72	17.1263	17.2247	19.305	20.3061	19.4704	13.0106	11.2499	14.6739	14.4116	13.9084	13.8536	16.8944	16.5921	18.8427	18.3398	12.1682	11.6984	14.842	14.2061	19.3437	18.5098	17.6881	17.2076	16.2193	15.8706	18.3222	17.7062	16.5037	16.0342	17.224	16.7488	18.6969	18.2708	19.2647	18.8382	16.5047	16.0761	17.803	17.3994	17.7578	17.4236	14.8854
2007-08-13	19.3937	18.8375	17.6376	17.2069	16.1265	15.5426	17.6769	17.1645	16.5993	17.8031	20.1899	19.3774	11.9338	11.1928	14.7887	14.5471	13.9947	13.9615	17.0516	16.7949	19.0197	18.5772	12.1639	11.6854	14.8542	14.2266	19.3541	18.5476	17.8234	17.3827	16.3833	16.0864	18.4194	17.8514	16.4811	15.9958	17.1432	16.6731	18.7298	18.3172	19.2842	18.8683	16.4192	16.0231	18.018	17.6152	17.7571	17.4357	14.8734
2007-08-14	19.2405	18.5528	17.5091	16.9325	15.9768	15.2778	17.5229	16.8511	16.4693	19.7405	19.9789	19.2916	13.5046	11.065	14.6404	14.3788	13.9278	13.8841	16.8648	16.5824	18.757	18.2798	12.0183	11.5246	14.6451	13.9949	19.0812	18.2453	17.5928	17.1225	16.1775	15.8524	18.1658	17.5671	16.3072	15.7318	16.9724	16.3159	18.5677	18.0516	19.1234	18.6114	16.1376	15.9364	17.7332	17.3782	17.5297	17.3347	14.8053
2007-08-15	19.0978	18.5024	17.4092	16.8926	15.8248	15.219	17.3981	16.8087	16.3242	19.414	19.7615	18.9422	13.4484	12.5496	14.6522	14.379	13.9534	13.8888	16.8898	16.5863	18.7684	18.2809	11.9632	11.5106	14.5796	13.9791	18.996	18.2263	17.5898	17.1199	16.2004	15.8561	18.1366	17.5602	16.1753	15.6468	16.9541	16.2438	18.4525	17.958	19.0076	18.5216	15.9806	15.9864	17.4791	17.4056	17.3822	17.3709	14.7655
2007-08-16	18.9504	18.2449	17.2672	16.6641	15.688	14.9232	17.2356	16.5785	18.4871	19.2809	19.5756	18.5724	13.309	11.795	14.5671	14.3543	13.9111	13.9207	16.7806	16.5939	18.6191	18.2534	11.8921	11.3591	14.4748	13.8053	18.8591	18.0186	17.4613	17.062	16.0809	15.8599	18	17.4645	16.2045	15.5088	16.9876	16.196	18.426	17.8657	18.9929	18.4264	16.0238	15.9961	17.4047	17.4666	17.3934	17.3892	14.7764
2007-08-17	18.9666	17.9592	17.2739	16.3878	15.7083	14.6524	17.2453	16.2677	19.1612	18.9265	19.6052	18.2098	13.3771	12.2751	14.577	14.2028	13.9123	13.8665	16.7914	16.4183	18.6381	17.9952	11.9127	11.1702	14.5022	13.5505	18.8946	17.6944	17.4801	16.8234	16.0935	15.6655	18.0249	17.1944	16.2753	15.412	17.1046	16.1454	18.5299	17.7477	19.0876	18.3147	16.1676	15.899	17.5199	17.4368	17.5032	17.323	14.8109
2007-08-18	18.8238	17.8107	17.1969	16.2406	15.5261	14.4789	17.1539	16.1314	16.0303	18.8064	19.3559	18.0042	13.1817	10.9457	14.6154	14.1382	13.9851	13.8621	16.8752	16.3643	18.697	17.9003	11.7746	11.0375	14.3478	13.3891	18.7032	17.4991	17.4933	16.719	16.1758	15.6047	17.9792	17.067	16.0913	15.3108	16.9492	15.9939	18.4013	17.6825	18.9517	18.2478	16.1701	15.6789	17.6764	17.2851	17.5376	17.1529	14.813
2007-08-19	18.6293	17.9956	16.9777	16.4034	15.3761	14.7475	16.9014	16.2503	17.18	19.1933	19.1493	18.494	13.292	12.4683	14.3804	14.0911	13.8209	13.7504	16.5425	16.2179	18.291	17.7712	11.7279	11.2542	14.2352	13.6038	18.5462	17.7344	17.177	16.6785	15.8198	15.4514	17.6949	17.0834	16.0075	15.3571	16.8406	16.0301	18.2703	17.6879	18.8328	18.2562	16.1396	15.5551	17.5682	17.0387	17.4968	17.0265	14.805
2007-08-20	18.8333	18.6175	17.1616	16.9455	15.5747	15.3797	17.1134	16.8677	17.2432	19.8087	19.4205	19.3732	12.9916	13.3344	14.6048	14.358	13.9398	13.811	16.8346	16.5144	18.6819	18.2514	11.8913	11.7055	14.482	14.2032	18.8695	18.5044	17.5087	17.1421	16.138	15.7888	18.038	17.6564	16.0468	15.7136	16.8794	16.4389	18.3231	17.9693	18.8817	18.5412	16.1853	15.7813	17.5927	17.0357	17.5291	17.1704	14.8158
2007-08-21	18.4806	18.9003	16.8932	17.2362	15.1279	15.6299	16.8508	17.1974	15.9484	20.0807	18.8601	19.4945	12.5966	13.2992	14.5179	14.6093	14.0476	13.953	16.8566	16.8471	18.5812	18.6874	11.3704	11.8603	13.8821	14.446	18.1496	18.8242	17.3054	17.5059	16.1462	16.1496	17.7026	18.0226	15.6892	15.9342	16.5283	16.6512	18.0723	18.2132	18.6226	18.7742	15.9624	15.9853	17.6511	17.3972	17.4046	17.3685	14.7589
2007-08-22	17.2208	18.4725	15.5549	16.8849	13.7708	15.1308	15.5778	16.8331	15.568	19.615	17.2313	18.8563	11.5159	12.9115	13.8155	14.4936	13.8763	14.0103	16.1938	16.7963	17.5667	18.5161	10.3192	11.4195	12.5853	13.9213	16.5834	18.1842	16.2735	17.2708	15.4219	16.0809	16.5505	17.6775	14.6801	15.5984	15.3358	16.2777	17.1799	17.9945	17.7615	18.5463	15.3081	15.843	17.1515	17.4628	16.8746	17.2925	14.5557
2007-08-23	16.9133	17.7523	15.3495	16.1777	13.5941	14.403	15.1754	16.0827	14.7146	17.0021	16.8584	17.9219	11.1885	12.5238	13.5927	14.1058	13.635	13.8485	15.7035	16.3249	16.9589	17.8443	10.4519	11.0032	12.5748	13.3412	16.4523	17.4373	15.8746	16.6689	14.8766	15.5613	16.1345	17.0117	14.4633	15.0648	15.0467	15.7008	16.8418	17.4732	17.4422	18.0434	15.0178	15.5276	16.4698	17.1589	16.5599	17.0295	14.4832
2007-08-24	17.6615	17.7102	16.0962	16.1463	14.3999	14.4237	15.9182	15.9904	16.3521	14.9871	17.8513	17.8982	11.6148	12.5922	14.0199	14.0795	13.7095	13.7936	16.1216	16.2461	17.6444	17.7675	11.2391	11.0989	13.5342	13.4295	17.6409	17.5278	16.5736	16.6374	15.3466	15.4772	16.9762	17.0013	14.8804	15.1846	15.4509	15.9957	17.2203	17.487	17.8069	18.0683	15.2724	15.4846	16.5483	16.8868	16.7504	16.9524	14.5728
2007-08-25	18.0229	17.8176	16.4496	16.2473	14.7096	14.4853	16.3396	16.1391	19.2128	18.9989	18.2888	18.0129	11.7839	12.6402	14.4019	14.1923	13.9489	13.8832	16.6603	16.4284	18.3412	17.9928	11.3878	11.0996	13.8517	13.474	18.0825	17.6075	17.1337	16.8031	15.9325	15.6754	17.5388	17.1607	15.1528	15.2418	15.9617	16.0155	17.4961	17.6068	18.0716	18.1768	15.5794	15.4541	16.918	16.9909	17.0201	16.9505	14.6598
2007-08-26	17.7439	17.4882	16.171	15.9077	14.3994	14.1277	16.0704	15.8109	18.806	14.7437	17.9129	17.5804	10.7367	12.45	14.1297	14.0334	13.9006	13.8572	16.4055	16.2849	17.9285	17.7593	10.9151	10.8208	13.2667	13.1319	17.3686	17.1933	16.7063	16.5574	15.6491	15.5164	17.0365	16.8736	14.9303	14.8337	15.6823	15.5371	17.3576	17.2634	17.9318	17.8434	15.3366	15.2358	17.0751	16.8294	16.8831	16.7723	14.5716
2007-08-27	17.4173	17.0654	15.8385	15.4497	14.0612	13.6709	15.733	15.3821	17.9339	18.2836	17.4912	17.038	10.3217	12.2361	13.894	13.855	13.7966	13.8097	16.1135	16.1071	17.5172	17.4891	10.6784	10.5611	12.9314	12.8052	16.9343	16.7941	16.3424	16.2891	15.3277	15.321	16.6376	16.5718	14.5404	14.3054	15.0647	14.863	16.9745	16.7624	17.5669	17.3658	15.0302	14.8836	16.5566	16.5117	16.5821	16.4668	14.4825
2007-08-28	17.1458	17.0405	15.548	15.4697	13.7693	13.7064	15.4574	15.3197	18.3592	18.0672	17.1418	17.0166	10.184	12.2065	13.8443	13.7948	13.8053	13.751	16.0943	15.9882	17.4709	17.3419	10.5498	10.5836	12.7896	12.7948	16.7741	16.7561	16.2728	16.189	15.307	15.1898	16.554	16.4701	14.4099	14.2342	14.9212	14.5882	16.8281	16.6526	17.4274	17.2595	14.7985	14.7579	16.3667	16.1875	16.3822	16.3266	14.3974
2007-08-29	16.9808	17.2548	15.3828	15.6797	13.6101	13.9085	15.2785	15.5546	18.1894	18.4047	16.9337	17.2866	10.0877	12.1656	13.7461	13.8585	13.7679	13.8004	15.9816	16.0961	17.3088	17.4802	10.4364	10.5923	12.6372	12.8349	16.5817	16.824	16.1236	16.2916	15.1833	15.3087	16.3896	16.5768	14.322	14.291	14.8671	14.7473	16.7574	16.7262	17.3595	17.3282	14.6925	14.824	16.1336	16.2335	16.2694	16.3826	14.3698
2007-08-30	17.2726	17.2285	15.717	15.647	13.9722	13.8723	15.5421	15.5329	18.4841	14.4682	17.46	17.2506	10.225	11.9506	13.783	13.7358	13.7351	13.7921	15.9597	16.0129	17.3088	17.3367	10.6001	10.3552	12.8047	12.5628	16.7613	16.5096	16.1696	16.12	15.1584	15.219	16.4522	16.3824	14.448	14.1722	15.0466	14.6579	16.8364	16.6655	17.437	17.259	14.8847	14.7131	16.1995	16.2487	16.422	16.3008	14.4476
2007-08-31	17.7355	17.6398	16.1712	16.0731	14.4403	14.3872	16.0242	15.8873	18.9227	14.8672	17.9259	17.8296	10.4425	11.866	13.9522	13.6701	13.7784	13.7149	16.1315	15.8596	17.5733	17.1487	10.9472	10.6682	13.2285	12.8519	17.2743	16.7953	16.4621	16.1027	15.3484	15.0484	16.7518	16.2586	14.8256	14.7693	15.4337	14.8144	17.167	17.0902	17.7559	17.6809	15.1765	15.0778	16.5059	16.2133	16.6777	16.5603	14.5417
2007-09-01	17.6072	17.7	16.0224	16.102	14.2368	14.3054	15.9433	16.057	18.8137	14.9305	17.7499	17.8417	10.2658	10.9143	13.9653	13.7407	13.8687	13.7892	16.2585	16.0109	17.6961	17.3366	10.7252	10.5725	13.0534	12.868	17.1248	16.9034	16.591	16.4487	15.4879	15.2165	16.7597	16.3883	14.5835	14.686	15.0577	14.7705	17.0435	17.1822	17.6322	17.7552	14.9952	14.9975	16.6617	16.7009	16.5719	16.5792	14.4602
2007-09-02	16.5471	17.1663	14.769	15.5849	13.0539	13.8119	14.8769	15.4659	17.8044	14.7188	19.2472	17.172	9.60634	10.3082	13.4328	13.6607	13.7792	13.7287	15.8654	15.8738	17.0768	17.1579	9.7819	10.4214	11.9463	12.5197	15.8317	16.4283	15.7599	15.9915	15.0712	15.0645	16.0057	16.2453	13.501	14.5626	13.9791	15.0703	16.0358	16.9488	16.687	17.5446	14.4506	14.9375	16.106	16.2923	16.0743	16.4745	14.2511
2007-09-03	15.5256	17.3205	13.6223	15.7578	12.0295	13.9998	13.7803	15.6069	16.8239	15.2544	17.994	17.3785	9.119	10.4597	12.8639	13.7362	13.5798	13.7547	15.2913	15.9564	16.2566	17.2786	9.11565	10.4489	11.1045	12.6428	14.805	16.5818	14.9694	16.1054	14.452	15.1553	15.1689	16.3712	12.7992	14.7202	13.3486	15.3519	15.289	17.1071	15.9873	17.6938	14.0153	14.9868	15.512	16.4667	15.6464	16.5369	14.0836
2007-09-04	15.2898	17.822	13.4113	16.2465	11.8193	14.5644	13.5157	16.0807	16.5905	15.1738	17.6949	18.0652	9.01497	11.0909	12.7543	13.8577	13.5134	13.6995	15.1135	15.9738	16.0117	17.38	9.04144	10.8644	10.9661	13.1003	14.6053	17.1024	14.7744	16.292	14.2527	15.1769	14.9478	16.619	12.7619	15.0082	13.2683	15.611	15.2248	17.3373	15.9231	17.9214	13.9066	15.3334	15.2452	16.5169	15.528	16.7855	14.0589
2007-09-05	15.9317	17.6814	14.2888	16.072	12.5644	14.2712	14.1571	16.0467	17.1867	17.1913	18.4627	17.815	9.73093	10.7024	13.0554	13.9754	13.5421	13.9372	15.2614	16.3736	16.2556	17.824	9.55867	10.5012	11.5143	12.8272	15.2008	16.8869	15.1104	16.5115	14.3973	15.6186	15.2816	16.8097	13.2038	14.6565	13.7013	15.2816	15.6473	17.1252	16.3095	17.7089	14.1124	15.2334	15.3673	16.947	15.7146	16.7892	14.1614
2007-09-06	16.737	16.4042	15.1535	14.6208	13.3933	12.9161	15.0033	14.7213	17.9656	16.9327	19.4777	16.2208	9.96149	9.8301	13.3983	13.1783	13.6637	13.6953	15.6305	15.6182	16.7883	16.7211	9.969	9.47191	12.0474	11.5612	15.8615	15.3667	15.6136	15.4106	14.8	14.8053	15.8286	15.6367	13.7351	13.4364	14.0382	13.9938	16.152	15.9879	16.7869	16.6422	14.4453	14.1921	15.714	16.0944	16.0231	15.8514	14.2934
2007-09-07	16.6791	16.1647	14.9998	14.5172	13.2451	12.782	14.9904	14.4141	17.9208	17.4055	19.3968	15.9063	9.85336	10.0743	13.3215	13.0861	13.7125	13.5572	15.6919	15.302	16.8394	16.312	9.70797	9.58581	11.8119	11.555	15.6394	15.2549	15.5694	15.1587	14.8777	14.4421	15.7929	15.3346	13.6736	13.1492	13.9459	13.643	16.1552	15.6021	16.791	16.2719	14.4432	13.9303	15.9379	15.1669	16.0491	15.541	14.268
2007-09-08	16.3893	16.8062	14.7277	15.2336	12.9839	13.4753	14.6659	15.0691	17.6357	18.0228	19.0297	16.7192	10.4334	10.8313	13.1182	13.4914	13.6141	13.643	15.4249	15.6485	16.4675	16.8473	9.52436	10.2131	11.5385	12.3038	15.2772	16.1401	15.2496	15.7271	14.583	14.8164	15.4421	15.9579	13.5894	13.6561	14.0749	14.3412	16.062	16.0707	16.6987	16.7089	14.4501	14.3659	15.8175	15.5604	16.04	15.9413	14.285
2007-09-09	16.1841	17.2506	14.444	15.6827	12.7344	13.9181	14.4673	15.5411	17.4451	18.465	18.7562	20.1264	10.8104	11.0681	13.0042	13.7717	13.6127	13.7596	15.3924	15.9851	16.4059	17.3256	9.31053	12.0389	11.3239	12.7174	15.0541	16.67	15.1377	16.1571	14.5563	15.1866	15.3376	16.4301	13.2755	14.306	13.8266	15.0582	15.7981	16.6772	16.4535	17.2846	14.4922	14.7344	15.9107	16.0472	16.0849	16.2889	14.2959
2007-09-10	15.6447	17.3859	13.7693	15.8169	12.1539	14.0499	13.9061	15.6865	16.9364	14.6315	18.1354	17.457	10.7478	10.2473	12.5728	13.795	13.511	13.7789	15.1026	16.0267	15.9816	17.3785	8.7213	10.9446	10.6739	12.7298	14.3259	16.6931	14.6451	16.1954	14.2625	15.2325	14.8575	16.4701	12.9399	14.5534	13.4861	15.378	15.4456	16.9641	16.1263	17.5566	14.1556	14.9295	15.7403	16.3203	15.7888	16.4729	14.1336
2007-09-11	15.7583	17.394	14.0495	15.8226	12.3522	14.0526	13.9903	15.6986	17.0232	18.6054	15.4059	20.2883	10.925	10.6877	12.6693	13.7435	13.4438	13.7759	14.9352	15.9921	15.7706	17.3182	9.02074	10.4481	10.8781	12.6137	14.4551	16.5588	14.5992	16.1229	14.0501	15.1951	14.7433	16.3875	13.0456	14.5357	13.6188	15.2927	15.5203	16.9511	16.1912	17.544	14.1065	14.9189	15.4031	16.4164	15.7136	16.4796	14.1533
2007-09-12	16.8175	17.3815	15.2729	15.8112	13.5412	14.0425	15.0452	15.6839	18.0393	18.593	19.5939	20.0945	11.7045	10.8094	13.3023	13.7383	13.5497	13.733	15.4006	15.9275	16.5042	17.2519	10.0482	10.5293	12.0579	12.6978	15.814	16.6356	15.4328	16.103	14.5433	15.1231	15.6377	16.3738	14.0556	14.5284	14.673	15.155	16.3997	16.9332	17.0189	17.529	14.53	14.8103	15.7221	16.3072	16.0893	16.3829	14.3323
2007-09-13	17.6723	17.6107	16.1097	16.0502	14.3743	14.3212	15.9602	15.8889	18.8757	18.8146	20.6683	17.9748	10.2678	11.1037	13.8245	13.876	13.7515	13.7713	16.0087	16.0688	17.3792	17.4659	10.6467	10.7063	12.8684	12.9492	16.8425	16.9451	16.2336	16.3129	15.2125	15.2786	16.523	16.611	14.7821	14.6367	15.3199	15.1671	17.1528	17.0273	17.7371	17.6173	14.9654	14.899	16.2484	16.2598	16.4876	16.4416	14.4766
2007-09-14	17.7572	17.8012	16.1887	16.233	14.429	14.4782	16.0725	16.115	18.9579	18.9974	17.9534	17.9964	10.1936	10.7235	13.873	13.9212	13.8253	13.8175	16.1405	16.1591	17.5316	17.5756	10.5599	10.6823	12.8138	12.9484	16.8114	16.963	16.3193	16.3858	15.3581	15.3779	16.6036	16.6827	14.5761	14.6209	15.237	14.8239	17.0515	17.0475	17.6348	17.6341	14.9952	14.8402	16.5321	16.3815	16.5529	16.4158	14.4701
2007-09-15	17.3834	17.7719	15.787	16.2062	14.0006	14.4651	15.7136	16.0716	18.5543	18.9422	17.4419	17.9666	9.84266	11.5232	13.5906	13.8807	13.7803	13.767	15.923	16.0667	17.1846	17.4674	10.0877	10.7282	12.2636	12.9724	16.1709	16.9708	15.9315	16.3199	15.1246	15.2764	16.1776	16.6211	14.0603	14.5034	14.5715	14.8571	16.5544	16.9293	17.1628	17.5226	14.6096	14.68	16.2532	16.1731	16.2202	16.2652	14.3174
2007-09-16	17.0611	17.619	15.4698	16.041	13.696	14.2617	15.3605	15.9472	18.2828	18.8222	19.6909	17.7492	10.0905	10.4329	13.3361	13.9274	13.679	13.8312	15.6306	16.1819	16.7688	17.6008	9.80915	10.6671	11.8883	12.9318	15.6969	16.9498	15.5512	16.3979	14.8046	15.4031	15.7643	16.6932	13.8134	14.1378	14.343	14.6185	16.3021	16.6409	16.9218	17.2413	14.4524	14.4249	15.8539	15.9702	16.0464	16.0381	14.2822
2007-09-17	16.796	17.326	15.1481	15.7483	13.3821	13.9738	15.1051	15.6337	18.0309	18.5274	19.5016	17.3757	10.1924	10.8095	13.2256	13.7973	13.661	13.7782	15.5554	16.027	16.651	17.38	9.63229	10.525	11.6896	12.7371	15.4717	16.7011	15.4129	16.1984	14.7263	15.2328	15.6199	16.4738	13.4176	13.8495	13.9645	14.4144	15.9432	16.328	16.5885	16.9506	14.273	14.2564	15.7866	15.6839	15.8928	15.868	14.1951
2007-09-18	16.5579	17.5004	14.915	15.9422	13.1599	14.2049	14.8425	15.778	17.7977	18.6925	17.8161	17.6211	10.1364	10.3679	13.0972	13.8208	13.6214	13.7511	15.4339	16.0056	16.4743	17.374	9.70072	10.6398	11.4884	12.8599	15.2303	16.8323	15.2366	16.2278	14.5957	15.209	15.433	16.5162	13.1994	13.942	13.7556	14.5415	15.6928	16.3803	16.3539	16.9992	13.9625	14.4104	15.4374	15.7053	15.5937	15.9946	14.063
2007-09-19	16.8461	17.7603	15.2709	16.1941	13.5103	14.4453	15.1145	16.0659	18.0711	18.8621	19.6172	17.9473	10.046	10.4017	13.2964	13.9214	13.5858	13.8035	15.4512	16.1406	16.5531	17.5588	9.95358	11.2367	11.9665	12.9831	15.7277	16.9976	15.4385	16.384	14.6006	15.3575	15.6383	16.6848	13.4589	14.069	14.0006	14.7705	15.9119	16.5219	16.5568	17.1317	13.968	14.4834	15.2562	15.9185	15.5819	16.0789	14.0945
2007-09-20	17.3156	17.5939	15.7547	16.0183	13.9995	14.2418	15.5986	15.9172	18.5276	17.6881	20.2226	17.718	10.5993	11.2045	13.6582	13.8376	13.7275	13.8193	15.8706	16.111	17.1535	17.4846	10.3524	11.0719	12.5162	12.7433	16.4238	16.728	15.9876	16.2686	15.061	15.3261	16.2411	16.5466	13.8019	13.7587	14.4342	14.3374	16.2648	16.2748	16.8839	16.8979	14.1213	14.1042	15.44	15.6968	15.7298	15.7404	14.1568
2007-09-21	17.6593	17.146	16.097	15.5333	14.361	13.7516	15.9468	15.4679	18.8631	14.6667	20.6739	17.1396	10.2328	9.9266	13.7848	13.5814	13.7341	13.7663	15.9596	15.8938	17.3099	17.148	10.6064	10.1484	12.8115	12.2672	16.7688	16.1659	16.1721	15.9096	15.1584	15.0915	16.4555	16.1528	14.0945	13.1043	14.7475	13.5825	16.5451	15.6321	17.15	16.3038	14.1885	13.7298	15.5626	15.1482	15.7987	15.3628	14.1779
2007-09-22	17.8574	16.8737	16.2893	15.2676	14.5532	13.4977	16.1591	15.1674	19.0571	18.0827	20.9275	16.7977	10.417	9.74734	13.9283	13.4317	13.801	13.6858	16.1421	15.6842	17.5646	16.8603	10.7413	11.4836	13.0069	12.0813	17.0245	15.9121	16.3942	15.6697	15.3592	14.8598	16.6978	15.8901	14.2091	13.1406	14.8926	13.5592	16.659	15.5998	17.2617	16.266	14.3085	13.5897	15.6392	14.9077	15.9054	15.2178	14.2328
2007-09-23	17.7868	16.8668	16.2173	15.2609	14.456	13.4913	16.1057	15.1598	18.9886	18.0695	20.8225	16.789	10.6615	9.80744	13.8636	13.4835	13.8242	13.6971	16.1334	15.7283	17.5198	16.928	10.5428	11.5907	12.7939	12.1752	16.7881	16.023	16.306	15.7416	15.3504	14.9073	16.5885	15.9684	14.2484	13.4882	14.9041	14.0317	16.6955	15.9385	17.2954	16.584	14.1862	13.7348	15.6807	14.9572	15.809	15.3524	14.1603
2007-09-24	17.6299	16.6728	16.0629	15.0165	14.3017	13.2577	15.9385	14.974	18.8351	17.7912	20.6217	16.5437	10.8631	9.73446	13.7419	13.4349	13.7477	13.719	15.95	15.7452	17.2753	16.9314	10.4786	10.0735	12.6722	12.0327	16.6125	15.8798	16.1114	15.6992	15.148	14.9301	16.3798	15.9252	14.0269	13.5401	14.6158	14.1213	16.5209	16.0181	17.13	16.6594	14.1364	13.8194	15.4867	15.1504	15.7473	15.4433	14.1589
2007-09-25	17.2981	16.0461	15.6936	14.2355	13.9077	12.5636	15.6276	14.334	18.516	13.4406	20.1813	15.7776	10.923	9.24076	13.6577	13.0388	13.8008	13.6532	15.9892	15.4949	17.2818	16.543	10.1752	9.29599	12.3729	11.3505	16.3035	15.1176	16.0272	15.2285	15.1965	14.6744	16.2812	15.4483	13.6488	12.9502	14.1155	13.4756	16.1516	15.4888	16.784	16.1705	14.0093	13.5269	15.4583	14.9658	15.6364	15.1627	14.088
2007-09-26	16.5026	15.2417	14.7691	13.2496	13.0396	11.7274	14.8153	13.4826	17.7551	16.5514	18.7557	14.8124	9.28828	9.06755	13.0916	12.2617	13.6774	13.4287	15.5615	14.912	16.6362	15.7122	9.4884	8.32887	11.4231	10.2541	15.2123	13.8641	15.3101	14.3216	14.7477	14.0757	15.5374	14.5615	12.9839	11.9754	13.6621	12.4895	15.5261	14.5132	16.2033	15.2732	13.6545	13.007	15.111	14.3686	15.2912	14.6256	13.9172
2007-09-27	16.2429	14.5485	14.5831	12.3816	12.8464	11.0229	14.5048	12.7422	17.0702	15.8915	16.0049	13.9952	11.0997	9.565	12.8879	11.6004	13.5307	13.1825	15.1814	14.3225	16.1193	14.8949	9.27309	7.62118	11.1939	9.39955	14.852	12.844	14.9197	13.5072	14.3187	13.4578	15.0886	13.7507	13.0619	11.1712	13.7158	11.6544	15.5302	13.6664	16.1978	14.495	13.7833	12.3346	14.9574	13.5701	15.3949	13.8968	14.0287
2007-09-28	15.7908	14.2703	13.8903	12.1039	12.2797	10.7634	14.072	12.4351	16.297	15.6002	15.4764	13.6485	10.9434	7.87069	12.6461	11.3623	13.5442	13.082	15.1938	14.0673	16.1092	14.5404	8.79217	7.38363	10.7749	9.08668	14.4571	12.4523	14.7574	13.1793	14.3627	13.183	14.9799	13.408	12.3563	10.9057	13.0805	11.3572	14.9174	13.3703	15.6461	14.2165	13.4271	12.1871	14.9507	13.1152	15.0658	13.7419	13.7839
2007-09-29	14.7162	14.6194	12.5469	12.6356	11.1788	11.1477	12.9277	12.795	16.0608	15.6616	14.205	14.034	8.33607	8.16496	11.9095	11.7759	13.3004	13.1884	14.6014	14.2377	15.2804	14.7686	8.3776	7.88986	9.79429	9.57881	13.3173	12.9579	13.8886	13.5216	13.7503	13.3263	14.1306	13.6697	11.5358	11.6661	12.1677	12.1242	14.0467	14.1075	14.8406	14.8781	12.9094	12.5384	14.1966	13.4479	14.5215	14.1239	13.5468
2007-09-30	14.4352	14.7661	12.3519	12.7191	10.9416	11.2627	12.6062	12.9663	11.8097	16.0634	13.8303	14.2331	8.20317	8.31165	11.7863	11.9529	13.2153	13.288	14.3312	14.5269	14.8998	15.1735	7.86721	8.03199	9.60251	9.82971	13.0218	13.3123	13.6025	13.8481	13.4387	13.6524	13.782	14.0458	11.7676	11.597	12.3406	12.1085	14.2312	14.1092	14.9976	14.8968	13.0481	12.6205	14.0939	13.7312	14.6589	14.2124	13.686
2007-10-01	14.1972	14.6918	11.9343	12.6509	10.6713	11.1953	12.3657	12.8834	15.2041	15.998	13.5867	14.1389	9.59637	9.1331	11.4839	11.9457	13.1442	13.275	14.2543	14.4823	14.8039	15.1108	7.49321	8.03929	9.2658	9.8154	12.6979	13.2791	13.3971	13.8082	13.3932	13.599	13.6575	13.9916	11.1585	11.1789	11.6975	11.6951	13.6725	13.6701	14.504	14.4924	12.7291	12.5753	14.0538	13.6516	14.3289	14.1638	13.4258
2007-10-02	13.5547	14.8552	11.0835	12.8919	10.0365	11.3763	11.6783	13.0517	14.9761	16.1619	12.858	14.3232	7.61312	8.37042	10.9559	12.0282	12.9379	13.3003	13.8248	14.5423	14.2217	15.1949	6.95822	8.13713	8.64102	9.92506	11.9626	13.4038	12.8001	13.9006	12.9539	13.6599	13.0906	14.0796	10.3934	11.5688	10.8621	12.117	12.845	14.0273	13.7442	14.8086	12.3087	12.6371	13.4049	13.6882	13.8723	14.23	13.2238
2007-10-03	13.3977	15.1753	10.9971	13.3036	9.90077	11.7148	11.4977	13.3882	12.3507	16.4687	12.6374	14.7018	7.46641	8.53285	10.8197	12.2128	12.8735	13.3474	13.6389	14.6538	13.9603	15.3534	6.82921	8.37446	8.44682	10.1781	11.7047	13.6814	12.5764	14.0928	12.7473	13.769	12.841	14.2558	10.2546	11.8848	10.7269	12.5409	12.6609	14.3706	13.5719	15.1294	12.0345	12.6771	13.0371	13.7678	13.5682	14.2729	13.0679
2007-10-04	13.9164	15.4231	11.7472	13.5881	10.4325	11.965	12.0447	13.6537	14.0704	16.6909	13.2084	15.0039	7.76201	8.61222	11.2602	12.3057	13.0198	13.3925	13.8622	14.7784	14.2495	15.5274	7.3036	8.45905	8.92205	10.3056	12.2096	13.8511	12.9544	14.2419	12.9472	13.907	13.1366	14.4205	10.6773	11.7115	11.0483	12.3783	13.0913	14.2157	13.9577	14.9919	12.3907	12.6985	13.206	13.7897	13.9655	14.2957	13.3615
2007-10-05	13.8416	15.277	11.4636	13.3406	10.3173	11.7823	11.9856	13.5123	15.2521	16.5582	13.2129	14.8431	7.69487	8.54307	11.1093	12.2325	13.0005	13.3763	13.9591	14.7406	14.4042	15.4731	7.11142	8.36053	8.82375	10.2039	12.1818	13.7422	12.9812	14.1701	13.0932	13.8714	13.2666	14.357	10.6721	11.6528	11.1356	12.2139	13.1144	14.1454	13.9881	14.9224	12.5117	12.697	13.6019	13.8011	14.0951	14.2941	13.3452
2007-10-06	13.1609	15.1776	10.5674	13.2784	9.65882	11.7048	11.2552	13.396	14.6192	15.6919	12.4151	14.7107	7.17932	8.56854	10.284	12.2636	12.6603	13.3703	13.3897	14.7164	13.6626	15.4411	6.32342	8.42354	7.96124	10.248	11.1965	13.772	12.1702	14.1702	12.5394	13.8378	12.5642	14.3399	9.87513	11.5077	10.3897	12.0974	12.2823	14.0063	13.2391	14.7984	12.1355	12.7022	13.2415	13.7981	13.6779	14.2997	13.0602
2007-10-07	12.3815	15.1054	9.54762	13.1463	8.93734	11.6124	10.4182	13.327	9.94738	16.392	11.5537	14.6344	6.58326	8.44027	9.35075	12.1154	12.218	13.3521	12.6715	14.6935	12.7372	15.4063	5.51673	8.20279	7.03632	10.0487	10.0988	13.5823	11.2192	14.0682	11.8305	13.8312	11.7243	14.2746	9.2255	11.3559	9.77996	11.8519	11.5607	13.8466	12.5751	14.6507	11.6889	12.3564	12.6375	13.5315	13.1734	13.923	12.7826
2007-10-08	12.2852	15.0374	9.57212	13.0933	8.84391	11.5546	10.2995	13.2494	9.82564	16.3348	11.3778	14.5459	7.58141	8.45111	9.78115	12.1246	12.4279	13.3215	12.7182	14.5878	12.7179	15.2598	5.83962	8.26579	7.24439	10.0553	10.2513	13.5412	11.3553	13.9906	11.7942	13.7014	11.6593	14.1564	9.32421	11.4798	9.80173	12.0909	11.6497	13.9423	12.6467	14.7391	11.5615	12.4582	12.3407	13.3721	13.0369	14.038	12.6801
2007-10-09	13.2614	14.9514	10.9778	12.9561	9.79516	11.4544	11.3347	13.163	14.643	15.9891	12.4283	14.4511	8.06814	8.38343	10.6405	12.0452	12.7861	13.3265	13.3749	14.6289	13.5877	15.3161	6.66126	8.12598	8.18223	9.95487	11.3472	13.4697	12.2639	13.979	12.4513	13.7629	12.4858	14.1844	10.0746	11.5198	10.5547	12.1284	12.444	13.9898	13.3635	14.7855	11.9334	12.52	12.6593	13.6029	13.4655	14.1041	12.5883
2007-10-10	13.7189	14.8215	11.3693	12.803	10.2081	11.3244	11.847	13.0232	14.0402	15.5113	13.0195	14.2948	7.43152	8.23728	10.7168	11.8633	12.838	13.2572	13.6114	14.4532	13.9321	15.0708	6.72524	7.93173	8.35767	9.71242	11.6207	13.1752	12.5153	13.7419	12.7322	13.576	12.8128	13.9419	10.1383	11.4809	10.6489	12.0975	12.5447	13.9515	13.4698	14.7504	12.1269	12.4107	13.0632	13.475	13.6747	13.9853	12.8887
2007-10-11	13.4187	14.5446	10.9444	12.4063	9.90979	11.0273	11.5283	12.7343	12.0236	13.0692	12.6899	13.9822	7.19114	7.94516	10.3848	11.465	12.7004	13.1355	13.3744	14.2305	13.6218	14.7706	6.40932	7.47521	8.00663	9.23987	11.2166	12.6641	12.1814	13.368	12.4995	13.367	12.519	13.6256	9.74044	11.021	10.2552	11.6203	12.1217	13.49	13.086	14.3365	11.9648	12.2245	12.9452	13.2685	13.4901	13.7802	13.0243
2007-10-12	13.4663	13.8748	11.1072	11.4783	9.97147	10.345	11.5691	12.0242	14.8786	13.1286	12.7086	13.2296	7.71466	7.58852	10.4803	10.969	12.7322	12.9426	13.3414	13.8314	13.5574	14.23	6.49864	6.97149	8.0478	8.65418	11.2251	11.9766	12.1774	12.8109	12.4393	12.9597	12.4547	13.0987	9.90364	10.0702	10.4096	10.7109	12.2738	12.4908	13.215	13.4306	11.8003	11.6827	12.6919	12.7099	13.3066	13.1599	12.8895
2007-10-13	13.4162	13.7285	10.9522	11.4475	9.90875	10.2307	11.5244	11.8502	10.8771	11.3713	12.683	13.0089	7.46347	9.53553	10.5377	10.9947	12.7611	12.9354	13.4405	13.7309	13.699	14.0782	6.55307	7.01036	8.14166	8.62934	11.3557	11.9002	12.2922	12.7266	12.5525	12.8302	12.5902	12.9583	9.80991	10.1094	10.3488	10.7258	12.1724	12.4849	13.1343	13.4078	11.5718	11.8474	12.4392	12.5451	13.0422	13.3699	12.7761
2007-10-14	13.3417	13.3526	10.9092	10.7969	9.84386	9.83961	11.439	11.4633	10.7988	10.8344	12.5789	12.6384	7.21896	9.22857	10.4438	10.3936	12.7228	12.7093	13.3799	13.4874	13.621	13.7935	6.46364	6.42434	8.04595	8.08453	11.248	11.3465	12.204	12.298	12.4947	12.6403	12.5164	12.6872	9.49276	9.79477	10.0354	10.3652	11.8235	12.1734	12.817	13.1374	11.4535	11.6497	12.2151	12.6201	12.9113	13.1257	12.7325
2007-10-15	12.8333	13.184	10.1175	10.7301	9.35091	9.69443	10.9054	11.267	10.3596	12.9391	12.0596	12.3906	6.99277	7.62974	10.0659	10.4091	12.5609	12.7003	13.1552	13.2596	13.3405	13.4439	6.1195	6.43047	7.68946	7.95434	10.8526	11.1056	11.8751	12.0753	12.288	12.3506	12.2588	12.3463	8.75405	9.76706	9.53051	10.2411	11.0198	12.1252	12.0889	13.083	11.022	11.5201	11.8088	12.2721	12.3871	12.9905	12.3788
2007-10-16	12.7604	13.8354	10.2012	11.6633	9.29007	10.3561	10.8094	11.9557	10.2562	15.1907	11.9038	13.1084	6.88677	7.64176	9.93719	11.0498	12.5014	12.9422	12.9775	13.6929	13.0897	14.0178	5.9948	7.08099	7.50169	8.6636	10.6036	11.9074	11.6605	12.7142	12.0899	12.7736	12.0181	12.907	8.81324	10.1539	9.39211	10.713	11.0606	12.5285	12.1118	13.4486	11.0367	11.8564	11.5639	12.5832	12.4351	13.3789	12.509
2007-10-17	12.9115	13.7651	10.3286	11.3502	9.42837	10.24	10.9786	11.9049	10.408	11.7791	12.1009	13.0994	6.93041	7.55281	10.0194	10.8984	12.5378	12.9174	13.0276	13.8024	13.1521	14.1953	6.06799	6.90034	7.57809	8.58737	10.6891	11.9085	11.7325	12.7591	12.1363	12.9366	12.0747	13.0646	9.06495	10.1986	9.63173	10.7603	11.338	12.5967	12.3692	13.5166	11.4752	11.9338	12.0769	12.8568	12.949	13.4576	12.8051
2007-10-18	12.1376	13.0665	9.19074	10.4497	8.72572	9.56986	10.1614	11.1532	9.73984	10.5657	11.3102	12.3072	7.39291	7.1213	9.21448	10.253	12.145	12.6452	12.6046	13.3227	12.6656	13.5649	5.41651	6.29116	6.94316	7.89963	9.99856	11.1087	11.1264	12.0937	11.7773	12.461	11.6714	12.4693	8.68143	9.55283	9.24503	10.0793	10.9254	11.9139	12.0005	12.9038	11.1208	11.3779	11.9807	12.3293	12.4999	12.8032	12.4288
2007-10-19	11.4089	12.5165	8.37575	9.76389	8.0749	9.05824	9.36772	10.559	9.05821	11.1456	10.4596	11.6827	6.20711	6.86998	8.54113	9.89716	11.8038	12.4838	11.9777	12.9852	11.8402	13.1093	4.84976	5.96361	6.23219	7.48792	9.11137	10.6008	10.3429	11.659	11.133	12.1083	10.9228	12.0407	8.24853	9.22061	8.73514	9.73825	10.4356	11.5118	11.5489	12.532	10.6641	11.1499	11.2502	11.7968	11.9676	12.5594	12.1819
2007-10-20	11.2664	12.6425	8.24343	10.0534	7.94156	9.17861	9.20908	10.6821	9.52053	10.2253	10.2771	11.7691	6.2038	6.97758	8.55084	10.1155	11.823	12.5776	11.8971	13.0533	11.7051	13.175	4.82511	6.15298	6.15335	7.64787	8.9924	10.7538	10.2497	11.784	11.0249	12.1491	10.7757	12.0925	7.97014	9.4279	8.61675	9.91238	10.1203	11.7284	11.2576	12.7237	10.5519	11.3157	11.0076	11.9492	11.8449	12.7591	12.1211
2007-10-21	11.5842	12.2064	8.69287	9.29834	8.20828	8.78335	9.54395	10.2329	9.19655	11.1441	10.595	11.3744	7.78014	6.63514	8.78155	9.43307	11.9447	12.2565	12.0687	12.7689	11.9182	12.8721	5.00623	5.59363	6.3573	7.14388	9.23614	10.2378	10.4693	11.3391	11.1896	11.9364	10.9588	11.8524	8.13499	9.00853	8.78684	9.51517	10.2879	11.2953	11.4077	12.3397	10.5841	11.1173	11.0309	11.8734	11.8868	12.5079	11.6655
2007-10-22	12.5173	11.408	9.98172	8.351	9.06665	8.08085	10.5386	9.37001	10.0203	9.06514	11.5925	10.4737	6.6936	6.10865	9.57016	8.60518	12.3333	11.8333	12.5571	12.0586	12.5079	11.9533	5.64926	4.91095	7.02694	6.32035	9.99532	9.22643	11.1376	10.4419	11.6344	11.2221	11.4649	11.031	9.059	8.36774	9.56967	8.79335	11.2902	10.5765	12.3164	11.6803	11.0401	10.5185	11.4658	11.1606	12.4494	11.7739	11.9406
2007-10-23	12.6328	11.2971	9.8977	8.30262	9.16552	7.96277	10.6858	9.23933	10.2897	8.93902	11.8192	10.2978	6.54304	5.9934	9.31056	8.48947	12.1996	11.7886	12.6207	11.8607	12.6662	11.6639	5.47834	4.78114	6.981	6.10927	10.0266	8.94214	11.157	10.2025	11.7746	10.9934	11.6564	10.7441	9.05288	8.05927	9.56895	8.5092	11.3174	10.2094	12.3599	11.3405	11.1855	10.3104	11.8695	10.6767	12.5985	11.5517	12.5578
2007-10-24	11.8602	11.27	8.88331	8.22636	8.47605	7.95064	9.85869	9.21595	9.47899	8.92698	10.9838	10.2947	7.12018	5.98288	8.71789	8.43867	11.8976	11.7564	12.1233	11.8504	12.0251	11.6626	4.99004	4.7527	6.3981	6.09334	9.31451	8.93053	10.5256	10.187	11.277	10.9934	11.0844	10.7535	8.16848	8.26835	8.65529	8.77262	10.3392	10.4316	11.468	11.5396	10.6128	10.4051	11.3176	10.7674	11.8846	11.673	12.0811
2007-10-25	11.7235	11.5046	8.84999	8.59258	8.33437	8.13791	9.69576	9.4584	9.79819	9.11639	10.7581	10.5075	6.25025	6.00928	8.83978	8.52699	11.9765	11.8098	12.0963	11.8822	11.9469	11.6878	5.04812	4.80766	6.39544	6.13534	9.27684	8.9716	10.5075	10.2304	11.2109	11.0116	10.9791	10.7619	8.07432	8.28221	8.46111	8.81015	10.2308	10.4515	11.3539	11.5633	10.3889	10.557	10.7752	10.9632	11.6488	11.8584	12.0361
2007-10-26	12.1591	11.4189	9.42459	8.3809	8.72757	8.08545	10.1624	9.37948	12.4608	9.08619	11.231	10.4751	6.46679	5.84295	9.09291	8.158	12.1022	11.5889	12.3128	11.6884	12.2289	11.4869	5.26182	4.56517	6.65279	5.91086	9.59136	8.72204	10.784	9.98366	11.4295	10.8578	11.234	10.6292	8.44791	7.87326	8.89307	8.37458	10.6812	9.99577	11.7608	11.147	10.5443	10.4695	10.9315	10.951	11.8452	11.7367	12.1227
2007-10-27	12.1655	10.5325	9.3343	7.27294	8.73791	7.39083	10.1794	8.44345	12.8426	8.30546	11.2846	9.56157	6.3957	5.36109	9.11723	7.24335	12.1114	11.03	12.3677	10.9895	12.3105	10.6604	5.29131	3.94365	6.70722	5.21407	9.6675	7.86014	10.8483	9.15695	11.4945	10.2063	11.3152	9.98507	8.53802	6.87152	8.99579	7.32494	10.7794	8.85084	11.8579	10.0851	10.5174	9.85367	10.9963	10.3015	11.798	10.9398	12.0959
2007-10-28	11.7458	10.2174	8.78355	7.00947	8.36813	7.06659	9.73061	8.08392	13.1632	8.62688	10.8339	9.12385	6.17888	5.24484	8.74228	7.2592	11.9107	11.1008	12.1411	10.8287	12.047	10.3693	5.00876	3.84737	6.41897	4.99791	9.33943	7.56355	10.5482	8.94052	11.2939	9.97921	11.1029	9.64049	8.10202	6.82316	8.53235	7.19735	10.5172	8.78751	11.5561	10.0189	10.5068	9.65776	10.9299	9.77711	11.7927	10.7445	12.1276
2007-10-29	11.4298	10.6146	8.42172	7.49811	8.08774	7.37732	9.38755	8.50394	9.07064	8.31798	10.47	9.53622	5.86812	5.54815	8.21434	7.78941	11.6218	11.4141	11.7283	11.2457	11.534	10.874	4.60494	4.22351	5.95408	5.42883	8.77397	8.09616	10.0327	9.44164	10.8945	10.3758	10.6665	10.0491	7.83896	7.3412	8.34696	7.71016	10.2754	9.3813	11.3071	10.5704	10.3551	9.75571	10.8095	9.90205	11.5947	10.8689	11.9882
2007-10-30	11.8286	10.7482	9.03638	7.60394	8.42441	7.51154	9.8032	8.656	9.39955	8.46419	10.8479	9.72187	6.05706	5.59122	8.67555	7.7624	11.8994	11.3723	11.9042	11.3281	11.6814	11.0238	4.89572	4.25447	6.1833	5.52508	9.00306	8.23672	10.2708	9.54453	11.0024	10.4943	10.7276	10.2239	8.1338	7.39028	8.42157	7.80594	10.5414	9.44032	11.5716	10.6304	10.4134	9.79082	10.7612	9.97952	11.6857	10.9072	12.084
2007-10-31	12.295	10.3403	9.57033	7.09094	8.85306	7.20927	10.3115	8.22931	9.83764	8.11455	11.3952	9.31566	6.25636	5.2641	8.92447	7.16704	12.0147	10.9969	12.2107	10.888	12.1085	10.5163	5.27059	3.85528	6.6578	5.08956	9.59461	7.69807	10.7875	9.01585	11.3382	10.093	11.1346	9.84526	8.49911	6.86422	8.67733	7.52328	10.8963	8.83728	11.9187	10.071	10.4822	9.57116	10.9061	9.78022	11.7615	10.6108	12.1077
2007-11-01	11.9974	10.0162	9.08032	6.75475	8.59216	6.93001	10.0031	7.87661	9.59561	7.81033	11.1204	8.93361	6.10118	5.04362	8.60557	6.85548	11.8389	10.8299	12.0268	10.5544	11.901	10.0737	4.96802	3.60246	6.38759	4.7457	9.30871	7.25198	10.5161	8.62004	11.1803	9.74363	10.9744	9.44719	7.91212	6.53768	7.96415	7.00892	10.2397	8.45617	11.3338	9.71161	10.1332	9.44473	10.5909	9.52563	11.3069	10.4678	11.8017
2007-11-02	11.8279	9.66601	8.95914	6.35181	8.43013	6.68911	9.81065	7.51296	9.41803	7.51626	10.8852	8.58316	6.14619	4.85825	8.78152	6.51632	11.9474	10.6025	12.0446	10.2854	11.8793	9.76822	4.99892	3.40579	6.33516	4.52955	9.20253	6.97458	10.4421	8.33709	11.1583	9.49864	10.9178	9.2312	7.62261	6.50161	7.81655	6.96046	9.89985	8.4142	11.0128	9.67162	10.1157	9.34829	10.3572	9.42242	11.322	10.3392	11.8855
2007-11-03	11.8206	9.49717	8.92064	6.19364	8.42709	6.52362	9.80597	7.32327	9.4192	7.3456	10.8923	8.36196	6.06253	4.77252	8.54866	6.42011	11.8073	10.5644	11.9872	10.1512	11.8535	9.57446	4.85696	3.30371	6.24256	4.37715	9.12491	6.77559	10.3545	8.16962	11.1435	9.34666	10.9355	9.03937	7.83641	6.43998	8.03638	6.74424	10.1416	8.36181	11.231	9.62074	10.2759	9.22441	10.5923	9.25622	11.5155	10.1806	11.9851
2007-11-04	11.5209	9.50022	8.51112	6.19338	8.17166	6.53187	9.48825	7.32819	9.1595	7.35163	10.5836	8.3712	5.81968	4.71081	8.14858	6.29413	11.5897	10.4716	11.6536	10.0617	11.4318	9.4835	4.54583	3.24088	5.87269	4.31595	8.66896	6.69569	9.94115	8.07904	10.8142	9.27233	10.5708	8.99038	7.92458	6.18488	8.1573	6.28138	10.2306	8.14464	11.3209	9.40302	10.3231	9.05463	10.6947	9.0498	11.5672	9.95737	11.9989
2007-11-05	11.3949	9.17414	8.40689	5.83622	8.051	6.33675	9.34637	6.99676	9.03053	7.08751	10.4147	8.05942	5.68669	4.49184	7.94925	5.90749	11.4837	10.2034	11.4641	9.73027	11.1843	9.10909	4.38395	3.01924	5.66738	4.06334	8.40971	6.35908	9.70913	7.73164	10.6201	8.96895	10.35	8.7349	7.77334	5.24233	8.11902	5.93999	10.1892	7.4414	11.2316	8.39989	10.3617	8.98917	10.7327	8.90563	11.6165	9.88579	12.03
2007-11-06	10.1523	9.06671	6.80838	5.74323	7.16775	6.19751	8.0598	6.8667	8.00851	6.96225	9.22133	7.88988	5.04014	4.4279	6.68967	5.86305	10.6472	10.2104	10.5733	9.62968	10.2054	8.94108	3.62909	2.93195	4.88032	3.91853	7.43204	6.17322	8.70895	7.58938	9.83972	8.8397	9.68731	8.54245	6.67079	5.57501	7.07697	5.95968	8.93487	7.79098	10.0783	8.91426	9.50728	9.06295	9.97584	8.96864	10.4683	9.989	11.2716
2007-11-07	8.62985	8.87156	5.30735	5.53388	6.03364	6.11996	6.44896	6.67893	6.64465	6.82107	7.52789	7.73104	4.21958	4.31632	5.41722	5.63231	9.8339	10.0256	9.30221	9.45846	8.65777	8.78022	2.78703	2.83987	3.81453	3.83791	6.00415	6.05681	7.3292	7.43783	8.59479	8.70416	8.48406	8.48186	5.36259	5.31596	5.80805	5.67411	7.36231	7.48814	8.59256	8.62134	8.6137	8.86405	8.63386	8.84367	9.34196	9.69908	10.7424
2007-11-08	8.30487	8.17624	4.98403	4.89006	5.65587	5.70938	6.06767	5.97298	6.29285	6.23919	7.06538	7.02094	4.11797	3.86321	5.3688	4.89362	9.90527	9.49334	9.12449	8.73399	8.31216	7.9731	2.58679	2.45549	3.47278	3.38504	5.58047	5.4081	7.02833	6.74332	8.33603	8.03862	8.03347	7.97376	5.40696	4.25292	5.71538	4.78329	7.4245	6.14008	8.66277	7.12464	8.75992	8.31638	8.41961	8.2213	9.63073	8.95539	11.0143
2007-11-09	9.30075	8.76335	6.05366	5.47713	6.27631	5.85429	7.08649	6.51305	7.11425	6.63166	8.04498	7.4503	4.56038	4.04413	6.16301	5.34603	10.4485	9.93547	9.82172	9.03617	9.11119	8.14774	3.05429	2.4987	4.01577	3.31987	6.30393	5.38754	7.76503	6.88899	8.98237	8.21154	8.59408	7.82745	6.10836	4.46257	6.39974	5.16913	8.23192	6.0029	9.43062	7.03343	9.35127	8.54729	9.21099	8.10369	10.3882	9.36251	11.4158
2007-11-10	9.42757	9.36107	6.08981	6.03951	6.5408	6.44096	7.26909	7.18473	7.32075	7.23575	8.35126	8.23299	4.55305	4.38369	5.99056	5.78757	10.2481	10.1588	9.82495	9.56209	9.2351	8.86333	3.08802	2.8875	4.15805	3.86636	6.48349	6.10331	7.84293	7.51829	9.0688	8.77676	8.84777	8.48771	5.92509	5.66541	6.3442	6.02454	8.08968	7.94448	9.26651	9.01402	9.27061	9.00384	9.39979	8.81731	10.2219	9.92913	11.2269
2007-11-11	9.17286	8.6058	5.85198	5.28518	6.27945	6.01793	6.97976	6.42413	7.0579	6.62383	8.00841	7.50216	4.35273	4.20143	5.71628	5.43642	10.0984	9.88443	9.51497	9.27799	8.82489	8.58009	2.86435	2.73645	3.85152	3.71897	6.08028	5.89063	7.48054	7.26035	8.74344	8.53988	8.48336	8.35476	5.81317	5.11278	6.35573	5.63783	8.10802	7.31953	9.17802	8.37264	9.07273	8.622	9.04786	8.6448	9.98668	9.35287	11.1328
2007-11-12	8.68537	8.9713	5.35529	5.69176	6.04212	6.02507	6.49862	6.73724	6.68077	6.84259	7.56773	7.68957	3.94991	4.44358	5.01858	5.98253	9.57417	10.34	8.87298	9.64535	8.1409	8.8895	2.53475	2.92392	3.48867	3.84966	5.55287	6.08737	6.88553	7.56274	8.17511	8.80599	8.09858	8.40977	5.46642	5.48595	5.86498	5.89785	7.68101	7.75726	8.79128	8.80396	8.5163	8.89257	8.52084	8.54136	9.20994	9.81439	10.6749
2007-11-13	7.84686	8.70892	4.60255	5.38673	5.49674	6.12207	5.63406	6.54079	5.95232	6.72856	6.6633	7.6375	3.49733	4.12787	4.39164	5.24849	9.18564	9.69366	8.14776	9.15142	7.24525	8.51501	2.11152	2.73097	2.92127	3.76496	4.76552	5.91868	6.12941	7.21061	7.44935	8.47195	7.40506	8.43577	4.62087	5.18581	5.16594	5.44648	6.66763	7.39168	7.81167	8.46452	7.95594	8.61827	7.69504	8.65233	8.49185	9.34488	10.3597
2007-11-14	7.31508	7.59351	4.13447	4.39823	5.11205	5.35701	5.07574	5.38054	5.47128	5.73953	6.05616	6.39878	3.28863	3.50486	4.11678	4.39766	9.02564	9.18292	7.8139	8.15787	6.82128	7.2663	1.91049	2.1272	2.64414	2.94596	4.38416	4.79468	5.77285	6.14998	7.10742	7.46459	7.06123	7.43492	4.33221	4.40586	4.65725	4.64341	6.33351	6.43398	7.49975	7.56473	7.94179	7.89394	7.4478	7.70145	8.53184	8.38691	10.4361
2007-11-15	7.04894	7.11158	3.91459	3.95962	4.93966	4.96814	4.80249	4.86323	5.23714	5.28894	5.76108	5.82437	3.11861	3.23115	3.88432	4.03493	8.86241	8.96417	7.5301	7.71673	6.50144	6.71716	1.79578	1.877	2.49789	2.60424	4.15454	4.31665	5.52478	5.69392	6.83981	7.01907	6.86907	7.00794	4.24139	3.98718	4.5585	4.20167	6.21272	5.94246	7.38117	7.08487	7.93814	7.51977	7.5563	7.04942	8.49798	7.93214	10.3907
2007-11-16	7.2081	6.50163	3.99186	3.6208	4.92656	4.79619	4.93234	4.30716	5.33418	4.82348	5.87359	5.24086	3.1845	2.78889	3.99923	3.47593	8.9909	8.55535	7.65838	6.96021	6.57871	5.89912	1.76263	1.6608	2.42402	2.33423	4.1085	3.82324	5.55194	5.11382	6.92149	6.31989	6.79359	6.6033	4.31648	2.84625	4.67499	3.46759	6.32169	3.89126	7.48701	4.91039	7.94374	7.23769	7.50007	6.74303	8.5217	7.54127	10.4181
2007-11-17	7.66923	6.38254	4.39358	3.30552	5.22213	4.38822	5.40621	4.08351	5.73493	4.60698	6.37302	4.95742	3.46031	2.74068	4.38991	3.41429	9.24985	8.62534	8.10658	6.93538	7.10911	5.70005	1.99483	1.38834	2.72653	1.91726	4.54359	3.38021	5.99005	4.83831	7.35653	6.20265	7.16651	6.14946	4.45836	2.53474	4.99944	2.98576	6.55947	3.49617	7.61731	4.4285	8.14412	7.09993	7.69707	6.45959	8.80328	7.38513	10.5705
2007-11-18	7.39597	6.88145	4.2392	3.74539	5.23881	4.77192	5.1805	4.61318	5.56941	5.06841	6.1853	5.54424	3.19067	2.99495	3.96439	3.73326	8.86703	8.79533	7.62846	7.33924	6.68663	6.231	1.93665	1.64679	2.71055	2.28247	4.40597	3.87522	5.71031	5.28656	6.97503	6.62778	7.11848	6.60544	4.1413	2.82019	4.71125	3.28181	6.16171	3.84326	7.23519	4.76863	8.00463	7.28765	7.71884	6.56897	8.5667	7.66971	10.4039
2007-11-19	6.8065	6.49547	3.74813	3.60462	4.833	4.77672	4.56896	4.29596	5.04072	4.81299	5.51505	5.22746	2.93948	2.75431	3.66032	3.43152	8.74592	8.54051	7.24684	6.90993	6.12473	5.81827	1.60846	1.60519	2.23216	2.25302	3.79722	3.72434	5.20445	5.03542	6.53919	6.25898	6.53858	6.50834	3.37225	2.56643	3.90412	3.02634	4.93607	3.51923	5.96072	4.40418	7.62845	7.08941	7.25565	6.62048	8.05986	7.32622	10.1672
2007-11-20	6.73242	5.9533	3.6302	3.12601	4.68702	4.33744	4.46371	3.71521	4.94117	4.30162	5.3842	4.57224	2.90545	2.43335	3.61234	3.05245	8.69422	8.33496	7.18118	6.3923	6.07775	5.15569	1.62282	1.3194	2.26147	1.84674	3.81026	3.15134	5.18658	4.5029	6.49218	5.72151	6.56265	5.98031	3.24535	2.30348	3.93287	2.58782	4.33674	3.2291	5.32785	4.13299	7.60456	7.0348	7.02436	6.29249	8.08005	7.31986	10.2064
2007-11-21	6.86359	5.89286	3.74633	3.05583	4.78887	4.26632	4.60325	3.64337	5.06283	4.23753	5.539	4.49029	2.82349	2.42037	3.51039	3.02474	8.63564	8.34453	7.04859	6.38658	5.91074	5.10304	1.54987	1.23781	2.15954	1.72542	3.66642	3.02433	5.0508	4.422	6.35652	5.69193	6.43195	5.85327	3.24522	2.4402	3.80724	2.67811	4.33477	3.39776	5.27045	4.30129	7.67476	6.96049	7.17155	6.36486	8.1589	7.1777	10.2416
2007-11-22	7.01798	6.28825	3.85216	3.23618	4.84861	4.33782	4.74993	3.99009	5.18427	4.52743	5.6894	4.85702	3.04521	2.62618	3.81788	3.26753	8.88821	8.51263	7.43635	6.73703	6.29308	5.49325	1.62493	1.34199	2.23271	1.86297	3.84723	3.26836	5.31066	4.69628	6.69187	6.02375	6.55635	6.06202	3.21289	2.81143	3.6044	3.18188	4.31507	3.85494	5.23354	4.77325	7.71044	7.19364	7.2055	6.3778	8.20956	7.56254	10.2635
2007-11-23	7.2888	7.05412	4.07106	3.84722	5.00363	4.79512	5.02243	4.7649	5.41419	5.18743	5.97627	5.68663	3.19748	2.93125	3.99555	3.65865	8.9505	8.7713	7.66605	7.24437	6.64024	6.08374	1.83097	1.55555	2.5364	2.14772	4.2311	3.70697	5.62421	5.1512	6.95978	6.51503	6.92562	6.44299	3.41875	3.08184	4.06469	3.49922	4.56582	4.17149	5.4794	5.07463	7.90805	7.46022	7.38398	6.85543	8.49218	7.88318	10.4192
2007-11-24	7.15309	7.44587	4.02043	4.21494	5.04499	5.1283	4.92051	5.19056	5.34242	5.56028	5.89641	6.16147	3.06846	3.16558	3.82001	3.96535	8.82399	8.95536	7.44879	7.62284	6.40047	6.55484	1.75178	1.76704	2.43724	2.43769	4.06855	4.11433	5.44244	5.54002	6.7576	6.89763	6.79182	6.80779	3.39393	3.15615	4.11045	3.69165	4.52622	4.26236	5.43731	5.16653	7.8234	7.7247	7.46098	7.12425	8.33164	8.25428	10.2762
2007-11-25	7.06185	7.24152	3.88606	4.08553	4.87158	5.08831	4.79342	5.00717	5.22082	5.4153	5.73495	5.98745	2.94928	3.08907	3.6689	3.84417	8.73563	8.83103	7.25602	7.47909	6.15881	6.44882	1.64527	1.78294	2.28944	2.48339	3.86023	4.12554	5.24492	5.48763	6.5613	6.79434	6.60355	6.84706	3.49751	3.0974	4.36756	3.65993	4.66851	4.18694	5.57341	5.08527	7.89115	7.69596	7.37195	7.28074	8.46723	8.16595	10.4064
2007-11-26	7.18922	7.18961	4.00768	3.98859	4.98562	4.94374	4.93342	4.92167	5.34426	5.32898	5.89276	5.86988	2.87229	3.0657	3.57119	3.83015	8.67207	8.86623	7.12827	7.45879	6.00877	6.36144	1.59021	1.68853	2.21537	2.33398	3.74717	3.96139	5.129	5.38474	6.43675	6.73815	6.50459	6.67549	3.62417	3.19972	4.2767	3.62535	4.82163	4.32005	5.71406	5.226	7.8021	7.64617	7.43081	7.12472	8.30396	8.12339	10.2891
2007-11-27	7.86219	6.95586	4.55563	3.8904	5.25677	4.96716	5.58013	4.73322	5.86358	5.18573	6.51734	5.7006	3.25473	2.93925	4.13747	3.65224	9.13378	8.69669	7.78773	7.22614	6.66303	6.16583	1.75366	1.69421	2.37905	2.3686	4.09013	3.93526	5.59971	5.2779	7.00558	6.55564	6.74012	6.68635	4.02301	3.05116	4.51243	3.41133	5.30066	4.12833	6.18316	5.01765	8.03583	7.42398	7.47897	6.98814	8.67952	7.78827	10.53
2007-11-28	8.40699	7.06577	5.08313	3.85196	5.7534	4.79007	6.18165	4.77329	6.39429	5.19286	7.1958	5.69216	3.60432	2.97979	4.57861	3.72466	9.35224	8.81773	8.33321	7.32554	7.40808	6.17502	2.14809	1.58775	2.94047	2.18877	4.82951	3.77189	6.2481	5.22162	7.59484	6.59149	7.42792	6.4973	4.28306	3.17269	4.77471	3.5917	5.59919	4.28809	6.47096	5.20077	8.30109	7.43249	7.94359	6.78943	9.00004	7.85407	10.6533
2007-11-29	8.019	7.72061	4.74556	4.43753	5.58948	5.24698	5.80596	5.45681	6.0952	5.77609	6.83948	6.4229	3.40319	3.30623	4.25744	4.17138	9.09031	9.1074	7.99157	7.85762	7.06985	6.81084	2.04487	1.85979	2.83776	2.5495	4.63683	4.2926	5.99036	5.74104	7.30297	7.11292	7.29882	6.94999	4.10697	3.50786	4.76825	4.01434	5.39489	4.68367	6.26776	5.58192	8.18401	7.88907	7.91881	7.25551	8.81313	8.49348	10.5085
2007-11-30	7.73195	7.62131	4.46409	4.401	5.31353	5.32947	5.48504	5.39601	5.80975	5.74697	6.47275	6.40404	3.24958	3.23617	4.07189	4.03399	9.01093	8.94631	7.75521	7.71822	6.73142	6.74325	1.85661	1.90941	2.56437	2.65676	4.2837	4.37304	5.69145	5.7268	7.03826	7.03459	6.96419	7.06829	4.00822	3.38947	4.6008	4.29397	5.27646	4.52888	6.1577	5.42803	8.10395	7.97886	7.73056	7.62547	8.72846	8.54787	10.4736
2007-12-01	7.50534	6.7661	4.29672	3.81057	5.24067	4.94895	5.27283	4.57122	5.64023	5.05273	6.26888	5.53406	3.071	2.74124	3.81884	3.42015	8.80682	8.52301	7.44578	6.88218	6.42089	5.80284	1.78397	1.62358	2.48863	2.28185	4.12207	3.74607	5.47251	5.03917	6.76824	6.2408	6.84886	6.53308	3.50328	2.85721	3.92159	3.6524	4.66465	3.87779	5.54798	4.76497	7.85141	7.4489	7.53556	7.14986	8.359	7.78787	10.2258
2007-12-02	7.0298	6.5234	3.92813	3.43215	4.97899	4.50152	4.79817	4.2345	5.23855	4.73908	5.76586	5.12578	2.88778	2.63298	3.59087	3.27611	8.68597	8.52272	7.15451	6.75061	6.0379	5.50223	1.59895	1.33706	2.22663	1.8543	3.76625	3.26308	5.15033	4.69819	6.46141	6.03317	6.52063	6.0547	3.09422	2.63033	3.39131	3.05069	4.17973	3.62904	5.08176	4.53785	7.51029	7.30542	7.08035	6.64109	7.90829	7.68061	9.9584
2007-12-03	6.56355	6.59689	3.57873	3.60014	4.71005	4.72469	4.33086	4.36281	4.83712	4.86437	5.25714	5.2917	2.67196	2.64696	3.33083	3.29889	8.49292	8.48214	6.78144	6.74498	5.64093	5.58262	1.51205	1.47234	2.11908	2.06109	3.54792	3.47713	4.88199	4.82573	6.11885	6.07483	6.3429	6.27495	2.85344	2.59695	3.16529	2.82341	3.88875	3.58001	4.7835	4.47273	7.10247	7.04594	6.62693	6.57569	7.34626	7.26554	8.82932
2007-12-04	6.52296	6.66797	3.45881	3.55036	4.54698	4.59634	4.24772	4.38313	4.75465	4.86701	5.14777	5.28758	2.60371	2.57742	3.24045	3.20996	8.48383	8.4561	6.69382	6.64562	5.46021	5.41667	1.3517	1.35322	1.88099	1.88632	3.27497	3.26672	4.68431	4.66187	5.99118	5.95106	6.07441	6.07173	2.87546	2.6508	3.10752	2.9145	3.92446	3.65537	4.83735	4.56811	7.09774	7.10589	6.34743	6.30845	7.4105	7.43419	8.81544
2007-12-05	6.61186	7.30222	3.57789	4.06013	4.68222	4.95362	4.36219	5.01957	4.85999	5.40337	5.28458	5.95638	2.63719	2.85737	3.2836	3.56618	8.48858	8.72392	6.73754	7.12794	5.54773	5.92769	1.42671	1.47662	1.99251	2.03556	3.40371	3.55705	4.77821	5.01768	6.05355	6.39081	6.20105	6.30403	2.9575	3.16315	3.15774	3.4428	4.01621	4.27523	4.91973	5.1908	7.10751	7.46169	6.50822	6.78501	7.38519	7.90393	9.36466
2007-12-06	6.51712	7.55021	3.4981	4.31557	4.6133	5.22359	4.26293	5.30579	4.7735	5.66207	5.17438	6.29171	2.49114	2.95878	3.11915	3.67894	8.37256	8.73192	6.48656	7.26709	5.27331	6.18698	1.36565	1.67185	1.9123	2.33013	3.24707	3.90615	4.59436	5.27623	5.81788	6.5806	6.068	6.65003	2.90503	3.43296	3.07329	3.93964	3.95293	4.5834	4.85875	5.48836	7.03821	7.59299	6.38377	7.06393	7.30198	8.0505	9.78954
2007-12-07	6.25001	7.25318	3.37289	4.09353	4.55797	5.09273	4.02668	5.01822	4.57511	5.42443	4.92281	5.99874	2.19801	2.80178	2.81873	3.48313	8.17673	8.60873	5.9884	7.00788	4.70963	5.87719	1.2377	1.55449	1.73379	2.16992	2.91214	3.66589	4.2218	5.03525	5.33649	6.32461	5.77081	6.43697	2.83904	3.15959	3.00586	3.55393	3.87223	4.24623	4.77568	5.14724	6.82465	7.41434	6.23578	6.94774	6.98557	7.78267	9.27001
2007-12-08	5.72354	7.26712	3.06823	4.04657	4.32991	4.97507	3.52799	4.99599	4.14037	5.38972	4.36063	5.94416	1.81099	2.99252	2.46001	3.74743	7.968	8.8441	5.34378	7.35077	3.94859	6.18884	1.05317	1.57946	1.46388	2.17136	2.43323	3.75975	3.7216	5.22521	4.69189	6.60676	5.32919	6.47913	2.53243	3.25311	2.75077	3.64548	3.49284	4.37573	4.37487	5.2916	6.50203	7.66629	5.85588	6.97487	6.54967	8.1956	8.88429
2007-12-09	5.30138	7.08249	2.74797	3.98377	4.04315	5.03556	3.0955	4.85888	3.75799	5.29293	3.86611	5.83587	1.57143	3.04723	2.18899	3.79004	7.83833	8.79527	4.96598	7.40964	3.44122	6.36779	0.817274	1.75304	1.12247	2.44355	1.96659	4.06467	3.30674	5.42475	4.2852	6.72703	4.89074	6.7942	2.14261	3.21715	2.43411	3.6378	3.01888	4.31773	3.89428	5.21815	6.2963	7.5781	5.5286	7.20374	6.29374	7.98935	9.41532
2007-12-10	5.33293	6.69412	2.64091	3.6376	3.90989	4.72642	3.07569	4.44368	3.73952	4.92969	3.84937	5.37275	1.56085	2.73597	2.15906	3.40617	7.82819	8.53901	4.95408	6.88742	3.4092	5.76805	0.772002	1.55733	1.05838	2.18198	1.8983	3.64405	3.2575	4.97827	4.26549	6.22423	4.82631	6.42918	2.12475	3.03779	2.28819	3.40161	3.00799	4.10582	3.92173	5.01887	6.34683	7.27376	5.45776	6.75489	6.3936	7.59831	8.18171
2007-12-11	5.76442	6.72055	2.89725	3.62469	4.102	4.68646	3.48659	4.45367	4.09702	4.9332	4.31055	5.37451	1.76139	2.56212	2.30129	3.19396	7.92857	8.43653	5.30201	6.61494	3.77771	5.39582	0.776004	1.36594	1.06861	1.90725	2.02025	3.27961	3.43625	4.65882	4.59462	5.92912	4.93478	6.08827	2.28608	3.01384	2.6485	3.31859	3.19493	4.0769	4.0992	4.98907	6.55184	7.07721	5.68208	6.48591	6.67479	7.34053	9.14096
2007-12-12	5.9643	6.77123	3.12821	3.68756	4.33654	4.75686	3.72384	4.51682	4.30886	4.9911	4.58161	5.44974	1.97907	2.51021	2.55035	3.13522	8.05306	8.39491	5.64859	6.52566	4.23496	5.29843	0.982154	1.34437	1.3656	1.87902	2.43104	3.22424	3.8072	4.59357	4.96284	5.84543	5.31851	6.04139	2.34646	2.98471	2.7301	3.36203	3.26937	4.0438	4.18385	4.95449	6.69593	7.16289	5.9132	6.43869	6.85444	7.49544	9.66611
2007-12-13	6.19848	6.74193	3.18761	3.6584	4.31594	4.72846	3.90915	4.48398	4.46033	4.96193	4.77325	5.41233	2.13547	2.52937	2.70118	3.15248	8.15506	8.42237	5.9173	6.56698	4.53096	5.31975	1.03204	1.31497	1.43515	1.83278	2.58488	3.18833	3.99002	4.58599	5.21904	5.87153	5.45362	6.00067	2.71105	2.96973	3.06014	3.45136	3.71738	4.02447	4.65155	4.93688	7.00368	7.15	6.16127	6.56879	7.30197	7.44029	9.87371
2007-12-14	6.27649	7.24105	3.38432	3.99638	4.56319	4.88407	4.0499	4.94815	4.59483	5.33835	4.94806	5.87175	2.14046	2.88437	2.7427	3.60723	8.14511	8.76311	5.90203	7.17732	4.57994	5.96852	1.15479	1.47675	1.61424	2.02906	2.7634	3.56303	4.09932	5.04127	5.23714	6.42885	5.63005	6.30118	2.78234	3.3484	3.17359	3.95904	3.78773	4.48938	4.69394	5.40709	7.02349	7.54696	6.43865	6.76313	7.26339	8.05166	9.81187
2007-12-15	6.04803	7.94816	3.16598	4.64539	4.35604	5.39451	3.79814	5.69142	4.37229	5.97294	4.66307	6.66642	2.00863	3.21534	2.5965	4.03268	8.06866	8.99822	5.68945	7.70377	4.30746	6.65256	1.04394	1.80935	1.45469	2.49433	2.53452	4.1955	3.88664	5.62005	5.01519	6.97757	5.41726	6.87894	2.53851	3.98988	3.00548	4.52208	3.48649	5.25153	4.40471	6.14407	6.90599	8.18627	6.22994	7.64645	7.12179	8.88529	9.52107
2007-12-16	5.69176	8.15222	3.08142	4.84434	4.35235	5.59081	3.51026	5.91956	4.12497	6.17611	4.33868	6.92771	1.80517	3.35523	2.44136	4.22746	7.96224	9.12684	5.33809	7.93196	3.92951	6.92262	1.02321	1.92468	1.42142	2.64554	2.38864	4.41465	3.69013	5.84099	4.68076	7.19942	5.28697	7.06764	2.07624	4.21522	2.7085	4.75975	2.91138	5.50445	3.76294	6.39734	6.51971	8.50867	5.98818	8.20633	6.54619	9.27519	8.34334
2007-12-17	5.51419	7.51725	2.72946	4.35672	3.96879	5.35097	3.24086	5.31484	3.88318	5.68827	4.03589	6.33751	1.75008	3.17613	2.30627	3.95238	7.92221	8.88544	5.27621	7.61601	3.76728	6.63357	0.809928	1.87709	1.11715	2.61761	2.06136	4.30438	3.45558	5.646	4.57831	6.94117	4.97543	7.01334	1.8358	3.72075	2.48063	4.53505	2.63257	4.90885	3.59489	5.8094	6.3567	7.93707	5.49567	7.83697	6.40042	8.42368	9.49405
2007-12-18	5.93097	7.0611	3.03948	3.89835	4.22991	4.89733	3.66283	4.80026	4.25177	5.22975	4.5087	5.74825	2.04845	2.99796	2.5976	3.73413	8.10403	8.78685	5.77981	7.34038	4.34633	6.2454	0.942316	1.6651	1.30624	2.31163	2.41082	3.90646	3.83531	5.30512	5.07161	6.63635	5.29101	6.63845	2.1217	3.36908	2.59782	4.0884	2.98066	4.4979	3.92089	5.41244	6.67606	7.65982	5.74346	7.13213	6.86474	8.14422	9.70924
2007-12-19	6.38208	7.23496	3.32549	4.02929	4.42196	4.9783	4.09323	4.96979	4.61841	5.37065	4.9735	5.92263	2.34849	2.97906	2.93788	3.70815	8.30127	8.76503	6.27303	7.30702	4.95062	6.21319	1.16284	1.6599	1.61802	2.30716	2.87976	3.89277	4.29344	5.28394	5.57033	6.60785	5.71848	6.62959	2.38586	3.40303	2.69731	3.97091	3.30439	4.54185	4.25664	5.4579	6.91923	7.61103	6.17959	7.13416	7.15669	8.06236	9.80554
2007-12-20	6.85021	7.69345	3.71037	4.40908	4.73407	5.21288	4.57594	5.42422	5.03458	5.7458	5.50037	6.38296	2.56606	3.16398	3.19464	3.97634	8.45844	8.98443	6.63312	7.62777	5.38273	6.53071	1.31751	1.73335	1.83274	2.38031	3.20732	4.05379	4.6213	5.50825	5.92841	6.88473	6.01241	6.74037	2.72863	3.41266	3.00769	3.96015	3.71871	4.55337	4.67539	5.4638	7.0468	7.83778	6.33035	7.24732	7.33006	8.41055	9.88635
2007-12-21	6.63602	7.52241	3.66653	4.3366	4.8028	5.30631	4.41909	5.30614	4.91671	5.67538	5.35951	6.31772	2.58453	3.10529	3.22305	3.86173	8.44465	8.82993	6.6466	7.50041	5.44986	6.49224	1.40601	1.8181	1.96605	2.53679	3.34985	4.18776	4.71304	5.53236	5.96915	6.8255	6.15619	6.90926	2.75787	3.25376	3.03232	3.71505	3.74139	4.36142	4.68543	5.26939	7.3591	7.80993	6.62436	7.43814	7.77452	8.31512	10.0809
2007-12-22	5.78935	6.79555	3.19891	3.774	4.46923	4.88019	3.62743	4.57423	4.22863	5.04954	4.47015	5.52815	2.18908	2.75602	2.83994	3.42944	8.16991	8.55609	5.95938	6.92211	4.71597	5.80513	1.31177	1.56499	1.84033	2.19164	3.01132	3.66411	4.27774	5.00289	5.32693	6.25626	5.86817	6.44573	2.19668	2.91441	2.477	3.22956	3.04068	3.94795	3.91734	4.8507	6.83644	7.46321	6.54581	7.04892	6.92735	7.83791	9.63563
2007-12-23	5.50626	6.97557	2.70454	3.76704	3.93924	4.71273	3.22491	4.67511	3.86838	5.10677	4.01723	5.58246	2.11121	2.87761	2.66078	3.59488	8.14928	8.74749	5.88882	7.16322	4.4631	5.96251	0.959596	1.48399	1.32914	2.0428	2.46732	3.57401	3.90659	5.04177	5.17342	6.42127	5.33896	6.31567	2.02628	3.11399	2.49051	3.41124	2.87663	4.20886	3.84727	5.13396	6.74827	7.62446	5.81495	6.94817	6.96629	8.1329	9.75345
2007-12-24	6.18373	7.7952	3.16474	4.50092	4.28894	5.27483	3.88875	5.52801	4.44134	5.8322	4.74852	6.48928	2.43609	3.33028	3.04009	4.21544	8.36271	9.14914	6.41766	7.90025	5.1255	6.8446	1.22612	1.86392	1.70642	2.54664	3.01374	4.29945	4.42631	5.76398	5.715	7.14417	5.83937	6.94655	2.58365	3.94866	3.44546	4.34759	3.53949	5.20401	4.5044	6.10025	7.15727	8.35535	6.38917	7.78616	7.49893	9.12733	9.98142
2007-12-25	6.03258	7.52848	3.33153	4.35638	4.57233	5.33972	3.85583	5.32096	4.42992	5.69146	4.73302	6.34022	2.34383	3.05277	2.96794	3.79153	8.26708	8.74208	6.23244	7.39285	4.9964	6.4299	1.31619	1.86748	1.84563	2.62296	3.1018	4.24842	4.41948	5.5276	5.57823	6.75606	5.94296	6.98792	2.34957	3.73408	3.25239	4.29922	3.23197	4.93324	4.13971	5.82024	6.88263	8.13448	6.43023	8.02351	7.03222	8.7042	9.72551
2007-12-26	5.51921	6.65681	2.81798	3.69136	4.07797	4.82882	3.28066	4.44422	3.92078	4.93932	4.08162	5.38858	2.12192	2.47853	2.71432	3.11603	8.13578	8.35316	5.87643	6.45471	4.53448	5.26653	1.11645	1.40874	1.55884	1.977	2.69893	3.30417	4.04989	4.61952	5.20426	5.80227	5.5684	6.12763	2.09383	2.88502	2.90997	3.27029	2.94493	3.90368	3.89959	4.78862	6.76706	7.34769	5.95919	7.05966	6.96055	7.64263	9.46059
2007-12-27	6.01697	6.37836	3.00743	3.36538	4.14139	4.48766	3.70605	4.11004	4.28018	4.63843	4.54235	5.00148	2.39651	2.36013	2.98594	2.95548	8.36777	8.30245	6.37295	6.28671	5.00965	4.98336	1.10642	1.19653	1.52735	1.66776	2.81451	2.93524	4.289	4.33252	5.63711	5.59252	5.64107	5.77303	2.31263	2.54841	2.8064	2.84347	3.22715	3.5137	4.14908	4.43306	6.94313	7.18504	6.18995	6.47883	7.19376	7.52197	9.83291
2007-12-28	7.20821	6.55343	3.9517	3.50372	4.81295	4.60027	4.90033	4.28902	5.29004	4.79317	5.80532	5.19807	3.04632	2.47235	3.83421	3.08587	8.92317	8.37985	7.44648	6.47158	6.27189	5.20823	1.59014	1.27903	2.17243	1.78343	3.78482	3.10936	5.28011	4.50395	6.68211	5.77822	6.48564	5.93067	3.12236	2.81291	3.70588	3.27634	4.21896	3.83601	5.16045	4.76527	7.63014	7.49096	6.77817	6.8123	8.18606	7.94565	10.3149
2007-12-29	7.49057	6.44717	4.29319	3.48447	5.25058	4.6295	5.26327	4.21031	5.63451	4.73208	6.26343	5.1231	3.21823	2.35824	4.01664	2.97833	8.9501	8.27876	7.69468	6.26005	6.69404	5.01897	1.87028	1.30698	2.59648	1.83168	4.30266	3.09594	5.67683	4.42459	6.99928	5.60057	6.99718	5.93534	3.36122	2.81698	4.11222	3.44653	4.48721	3.82856	5.3887	4.7395	7.83933	7.22758	7.45769	6.83472	8.35902	7.50078	10.2914
2007-12-30	7.09559	6.32105	3.95494	3.34192	4.97381	4.48308	4.85151	4.0614	5.27964	4.59857	5.81498	4.95159	3.04176	2.26232	3.78591	2.84911	8.80366	8.23223	7.40547	6.12065	6.34667	4.79526	1.72844	1.14901	2.40504	1.60255	4.02282	2.81839	5.39865	4.20382	6.71379	5.43259	6.75071	5.67026	3.08427	2.68254	3.36397	3.04015	4.16	3.67244	5.06978	4.58971	7.46332	7.04993	7.07539	6.361	7.83122	7.32736	8.72543
2007-12-31	6.93691	6.65065	3.81461	3.53357	4.85169	4.58031	4.683	4.36394	5.13292	4.85003	5.62848	5.26583	2.87393	2.40999	3.5722	3.00993	8.66249	8.34311	7.12607	6.37377	6.02165	5.07483	1.57455	1.2399	2.20828	1.71754	3.66968	3.07189	4.99192	4.5201	6.44319	5.67239	6.54193	5.80894	3.28372	3.11575	3.65496	3.39584	4.40853	4.20507	5.32581	5.1395	7.61502	7.28428	6.92698	6.55788	8.12265	7.66696	8.90038
2008-01-01	7.01261	6.85898	3.85073	3.75957	4.85122	4.81578	4.74618	4.60739	5.18177	5.06932	5.68672	5.54889	2.87543	2.43655	3.57961	3.05394	8.70078	8.33947	7.14413	6.39982	5.99294	5.15831	1.41167	1.42647	1.95105	2.00041	3.42383	3.35755	4.87531	4.68543	6.43289	5.7257	6.43072	5.96906	3.49915	3.25691	4.19189	3.62277	4.66195	4.35986	5.56803	5.27097	7.78099	7.1689	7.31644	6.67197	8.29837	7.44511	8.95518
2008-01-02	7.35884	7.22359	4.12099	3.98818	5.02261	4.89276	5.08699	4.93582	5.4653	5.33092	6.03739	5.86481	2.98352	2.7568	3.71767	3.444	8.78341	8.67138	7.31964	6.97334	6.2104	5.70628	1.64124	1.35284	2.27597	1.85604	3.86311	3.32544	5.2717	4.82166	6.61011	6.2177	6.59601	6.08474	3.72706	3.36522	4.12746	3.68866	4.93641	4.49895	5.83941	5.42192	7.93265	7.40494	7.42957	6.62365	8.52134	7.85115	9.16264
2008-01-03	7.25025	6.86315	4.10344	3.90556	5.11428	5.04006	5.02209	4.67914	5.43029	5.14828	6.00775	5.65644	2.95798	2.68114	3.67933	3.35622	8.73931	8.47539	7.26902	6.77714	6.17868	5.69251	1.65752	1.60768	2.30741	2.26198	3.88273	3.69437	5.26319	4.97135	6.57655	6.14426	6.62515	6.49067	3.51008	3.04763	3.98046	3.50521	4.66675	4.09792	5.56334	4.99518	7.78222	7.15767	7.43561	6.78686	8.2696	7.39691	8.97513
2008-01-04	6.89244	5.6073	3.78974	3.16917	4.84282	4.46597	4.64329	3.48306	5.10073	4.09917	5.58893	4.29418	2.76082	1.89429	3.43427	2.62178	8.56483	8.03074	6.93315	5.45807	5.80907	4.16021	1.5549	1.2636	2.17565	1.76288	3.65063	2.77084	4.99867	3.9801	6.2622	4.83966	6.43066	5.64697	3.15543	2.14403	3.70255	2.34646	4.24618	2.99696	5.15181	3.81637	7.4934	6.38022	7.03648	5.9433	7.8915	6.33062	8.73601
2008-01-05	6.94357	4.8645	3.7922	2.46213	4.80385	3.79294	4.67451	2.66516	5.12009	3.3753	5.60883	3.36614	2.77926	1.39793	3.4591	2.04923	8.63415	7.76215	6.99012	4.68062	5.79441	3.10076	1.45505	0.746656	2.01682	1.01513	3.50017	1.76468	4.93003	3.09647	6.27291	3.99544	6.26697	4.70033	3.31634	1.51191	3.87699	1.73583	4.44163	2.25457	5.36463	3.10688	7.67042	5.91491	7.02671	5.13598	8.18912	5.77123	8.91654
2008-01-06	6.45114	5.03571	3.61266	2.44212	4.8034	3.74141	4.26847	2.78211	4.79127	3.48077	5.19924	3.51389	2.47199	1.50793	3.13716	2.06323	8.33523	7.79188	6.42354	4.88108	5.28721	3.27691	1.50553	0.64741	2.11916	0.880717	3.44035	1.69572	4.69612	3.10189	5.8002	4.1719	6.26413	4.63498	2.83036	1.62257	3.49944	1.79677	3.82731	2.4009	4.70516	3.29536	7.17463	6.01305	6.91644	4.98798	7.39191	5.96368	8.46811
2008-01-07	5.74708	5.07398	3.01265	2.70222	4.25659	4.02706	3.52248	2.91156	4.13413	3.59232	4.35575	3.64093	2.16134	1.56945	2.73824	2.21757	8.16669	7.84576	5.9534	4.95544	4.59379	3.45272	1.08219	0.872839	1.50798	1.20028	2.67057	2.04115	4.056	3.35464	5.26498	4.28466	5.53587	4.96088	2.26064	1.6789	3.00119	2.04076	3.15767	2.44668	4.0635	3.28093	6.69592	6.10108	6.02937	5.2802	6.82508	6.03661	8.29473
2008-01-08	5.9119	4.95202	2.97999	2.39118	4.15486	3.69904	3.62371	2.70132	4.21427	3.40932	4.46025	3.42069	2.3841	1.63831	2.97612	2.17847	8.33374	7.85963	6.33729	5.09907	5.01225	3.53137	1.16399	0.701289	1.61681	0.960347	2.89734	1.84616	4.32663	3.26288	5.62611	4.38888	5.72977	4.77389	2.4719	1.59129	2.87351	1.70683	3.42225	2.3628	4.3608	3.26172	6.88723	6.32382	6.01791	5.31801	7.14511	6.39046	8.46216
2008-01-09	6.61001	5.13938	3.4858	2.64903	4.52729	3.95915	4.31437	2.93877	4.8047	3.61883	5.20689	3.68405	2.75113	1.81308	3.4262	2.40167	8.62685	7.95903	6.9499	5.36684	5.72629	3.91642	1.40771	0.926238	1.94634	1.28415	3.41486	2.25936	4.86428	3.61206	6.22198	4.68841	6.18363	5.16307	3.07016	1.82596	3.65211	2.14662	4.15589	2.63272	5.08155	3.51355	7.30374	6.4169	6.55578	5.66903	7.69998	6.4563	8.69529
2008-01-10	6.93372	5.20428	3.81142	2.55451	4.84856	3.83708	4.67941	2.94856	5.12973	3.62764	5.62439	3.7045	2.87614	1.86985	3.57585	2.43396	8.67368	7.98982	7.13399	5.47045	6.01761	4.01265	1.59578	0.901929	2.22354	1.25005	3.75734	2.25764	5.13721	3.64105	6.44352	4.77967	6.51436	5.15794	3.22488	1.93741	3.87161	2.194	4.3315	2.77966	5.23478	3.68855	7.633	6.52014	7.02327	5.63286	8.12772	6.63489	8.87776
2008-01-11	6.88683	5.72537	3.77248	2.84828	4.81684	4.05076	4.63091	3.43855	5.0879	4.05386	5.57145	4.25527	2.81885	2.25061	3.50477	2.81261	8.6341	8.25724	7.04188	6.12946	5.89968	4.72393	1.5423	1.01083	2.14835	1.39641	3.6528	2.60809	5.04017	4.07608	6.34821	5.39867	6.41875	5.45825	3.05667	2.31697	3.5617	2.50603	4.13095	3.24119	5.03674	4.1654	7.58018	6.83659	7.13746	5.98295	8.01005	7.06989	8.80964
2008-01-12	6.81378	6.83666	3.72415	3.61768	4.78836	4.54686	4.56161	4.51059	5.03005	4.95635	5.49928	5.38631	2.80304	2.82447	3.48527	3.52643	8.62409	8.70746	7.01686	7.07761	5.86635	5.85471	1.52587	1.43512	2.12497	1.97518	3.6213	3.47959	5.01196	4.95268	6.3216	6.33394	6.38953	6.23044	2.96483	3.16917	3.28692	3.39539	4.02258	4.27829	4.92909	5.211	7.24396	7.59951	6.77565	6.73474	7.54328	8.14634	9.86708
2008-01-13	7.14711	6.97948	3.9264	3.94874	4.85441	5.04494	4.86029	4.77634	5.26842	5.22798	5.78793	5.75652	2.96162	2.74271	3.69733	3.42038	8.79275	8.52686	7.29285	6.88679	6.14643	5.80205	1.58542	1.61478	2.18955	2.26848	3.76421	3.73359	5.20382	5.03305	6.56543	6.24206	6.49528	6.52004	3.35905	3.18309	3.8295	3.48009	4.50586	4.27018	5.42099	5.16154	7.51492	7.46527	6.74285	7.17418	8.00355	7.80885	8.85153
2008-01-14	7.13264	6.43218	4.01801	3.44324	5.05715	4.5764	4.90705	4.18159	5.33338	4.7043	5.88648	5.08681	3.00121	2.4609	3.73353	3.07722	8.76928	8.36247	7.33826	6.44557	6.26792	5.19762	1.69904	1.30293	2.36576	1.82038	3.96315	3.13997	5.33736	4.51385	6.64846	5.76319	6.69874	5.96415	3.24069	2.7233	3.83854	2.9527	4.34483	3.72234	5.23586	4.62685	7.59398	7.01489	7.15318	6.458	8.02898	7.24414	9.32331
2008-01-15	6.38699	6.30692	3.52315	3.36276	4.7081	4.52019	4.18588	4.0613	4.7169	4.60139	5.10429	4.95601	2.64428	2.3075	3.30608	2.92154	8.46047	8.24736	6.72536	6.17734	5.60343	4.9155	1.53935	1.26733	2.16223	1.77508	3.57605	3.01269	4.88008	4.34517	6.07864	5.51568	6.37667	5.85867	2.58034	2.44273	3.11795	2.79023	3.54571	3.38094	4.42181	4.2723	7.09588	6.80215	6.6924	6.14559	7.31855	6.97122	8.78209
2008-01-16	6.21912	6.274	3.20934	3.30736	4.3377	4.4558	3.93283	4.01429	4.48146	4.55787	4.80039	4.89978	2.54049	2.30752	3.16325	2.89149	8.44401	8.27183	6.59346	6.20432	5.32724	4.8705	1.28752	1.13835	1.78953	1.58415	3.15092	2.82444	4.57275	4.23562	5.88476	5.50309	5.95938	5.66926	2.41189	2.30887	2.90302	2.88308	3.36644	3.22934	4.27792	4.13316	6.90264	6.68223	6.17549	5.97229	7.13017	6.81686	9.01387
2008-01-17	6.74584	6.32432	3.61536	3.35242	4.64907	4.49691	4.46371	4.06836	4.93643	4.60538	5.37538	4.96052	2.72925	2.52482	3.39448	3.14513	8.57973	8.42768	6.90118	6.56481	5.70869	5.30115	1.44465	1.28814	2.00863	1.79224	3.46698	3.14554	4.87642	4.55913	6.19659	5.86078	6.24543	5.95727	2.9416	2.4151	3.37564	3.05249	4.01175	3.36195	4.93124	4.26996	7.21553	6.90435	6.42518	6.04398	7.58674	7.16687	9.90327
2008-01-18	6.50188	6.34003	3.60475	3.36305	4.7744	4.50468	4.30045	4.08367	4.81661	4.61852	5.23208	4.97722	2.67377	2.57554	3.32968	3.21106	8.5043	8.4422	6.7912	6.63447	5.63262	5.4272	1.48322	1.38741	2.07511	1.93864	3.50511	3.31787	4.8592	4.68915	6.11788	5.95277	6.29838	6.12504	2.79657	2.64311	3.35244	3.16998	3.81236	3.64202	4.68848	4.55698	7.24016	7.15991	6.70426	6.46332	7.55542	7.48409	9.9535
2008-01-19	6.10812	7.05523	3.1865	3.81513	4.35952	4.70869	3.84831	4.74132	4.41419	5.15486	4.71651	5.63639	2.51537	2.96833	3.14261	3.73455	8.39581	8.87055	6.53211	7.32351	5.31228	6.10849	1.35743	1.5073	1.89831	2.05563	3.2461	3.62853	4.6093	5.13991	5.85507	6.55189	6.06281	6.34168	2.39405	3.33918	2.84869	4.10968	3.33661	4.48716	4.23034	5.40379	6.94694	7.90678	6.39098	7.11737	7.14856	8.55761	8.4124
2008-01-20	6.58252	7.25965	3.45847	4.12653	4.50059	5.1487	4.28355	5.04008	4.7773	5.44868	5.17173	6.03278	2.78623	3.07179	3.4784	3.8179	8.68235	8.79691	7.01714	7.44286	5.77439	6.43118	1.39511	1.80235	1.91851	2.51784	3.4034	4.15208	4.8843	5.48902	6.26983	6.77311	6.16005	6.88085	2.67871	3.30898	3.06527	3.95498	3.69545	4.43199	4.61649	5.31878	7.27057	7.9806	6.401	7.71961	7.68485	8.52655	8.71388
2008-01-21	7.06617	6.6137	3.89574	3.63098	4.88688	4.76184	4.80148	4.38808	5.2292	4.88807	5.74649	5.32249	2.981	2.69383	3.70833	3.35657	8.756	8.50822	7.30618	6.81741	6.22559	5.68477	1.67839	1.52848	2.3365	2.14206	3.92355	3.58225	5.30162	4.9157	6.6146	6.15499	6.66218	6.37395	3.16873	2.79802	3.48343	3.28003	4.28129	3.81823	5.18963	4.71073	7.68663	7.43548	7.10612	7.09039	8.19561	7.78091	8.90869
2008-01-22	6.99924	6.33296	3.88213	3.36172	4.9221	4.50626	4.75582	4.07835	5.19853	4.6143	5.71319	4.97197	2.73049	2.57154	3.39965	3.20308	8.53512	8.45109	6.8784	6.63546	5.75706	5.40574	1.55317	1.35083	2.17618	1.88327	3.6354	3.26063	4.96979	4.65451	6.21517	5.94164	6.42138	6.06667	3.15589	2.66801	3.78046	2.98983	4.25768	3.67003	5.15262	4.57736	7.49387	7.16548	7.09798	6.56237	7.87631	7.46773	8.70889
2008-01-23	6.8349	6.86869	3.73549	3.67277	4.79221	4.63587	4.58033	4.563	5.04526	5.01033	5.51802	5.46088	2.59886	2.93248	3.23588	3.67402	8.47034	8.81099	6.68014	7.25787	5.46087	6.05802	1.37274	1.50812	1.91393	2.06834	3.3054	3.62573	4.69779	5.1104	5.98684	6.50401	6.10724	6.35283	2.85888	3.22971	3.53799	3.41899	3.89508	4.35723	4.78952	5.27561	7.25638	7.58439	6.69423	6.81425	7.58505	8.10077	8.60505
2008-01-24	7.05745	7.45187	3.86719	4.21562	4.83635	5.12062	4.77954	5.19344	5.20499	5.56109	5.7123	6.16123	2.83384	3.23353	3.53296	4.05253	8.69553	9.00269	7.08631	7.73054	5.88823	6.69604	1.47058	1.8369	2.03101	2.53573	3.54116	4.24672	4.99178	5.66019	6.35572	7.01059	6.29448	6.92914	2.98027	3.65661	3.32848	3.9728	4.0546	4.85746	4.96992	5.7528	7.38271	8.09906	6.70464	7.59144	7.79305	8.75553	8.73634
2008-01-25	7.11858	7.37543	3.97585	4.17987	4.99251	5.14036	4.87623	5.13464	5.30125	5.52029	5.8425	6.11687	2.92231	3.15233	3.63319	3.92945	8.70488	8.89398	7.20782	7.58658	6.11333	6.56507	1.6405	1.8178	2.28665	2.52616	3.84409	4.19951	5.21679	5.57351	6.52055	6.89316	6.59403	6.90689	3.1994	3.56052	3.50541	3.87296	4.31225	4.73979	5.21446	5.63375	7.53423	8.0925	6.96657	7.78952	7.97777	8.69448	8.79765
2008-01-26	7.2216	7.12445	4.00544	3.97475	4.94026	4.98514	4.94764	4.87898	5.34787	5.30241	5.89123	5.8432	3.05237	3.01904	3.82247	3.75849	8.88184	8.7928	7.44468	7.37095	6.31593	6.29582	1.64511	1.69879	2.2648	2.36178	3.88377	3.96777	5.33478	5.35292	6.7076	6.67435	6.59436	6.69824	3.42452	3.22506	3.69	3.78809	4.58644	4.33468	5.48985	5.22837	7.8208	7.85322	7.22978	7.49208	8.38687	8.37326	9.00564
2008-01-27	7.38638	7.23054	4.17494	4.01613	5.11588	4.9534	5.13682	4.95894	5.51812	5.35848	6.11128	5.90525	3.18153	3.08895	3.9754	3.86316	8.93996	8.89154	7.64087	7.49839	6.60673	6.4031	1.81412	1.70089	2.51256	2.34831	4.19913	3.98691	5.59557	5.41569	6.93307	6.77375	6.8961	6.69519	3.40114	3.24593	3.59622	3.69926	4.55058	4.37163	5.44412	5.27964	7.92675	7.86855	7.517	7.3734	8.48914	8.42933	9.01563
2008-01-28	7.37846	7.53176	4.16099	4.28172	5.09387	5.16354	5.12384	5.27317	5.50483	5.62739	6.09299	6.24302	3.23166	3.29107	4.0538	4.14256	9.00994	9.07802	7.7297	7.82979	6.68625	6.79176	1.82585	1.86109	2.51735	2.55777	4.22674	4.29492	5.64864	5.72998	7.00458	7.09422	6.90744	6.95946	3.44148	3.47608	3.78846	3.88119	4.60433	4.64346	5.50663	5.5439	7.79908	7.95734	7.39482	7.5232	8.30824	8.53836	8.92125
2008-01-29	7.0752	7.58979	3.9706	4.34611	5.01836	5.23979	4.84768	5.34384	5.28212	5.69302	5.82154	6.32937	3.01624	3.28682	3.74716	4.11161	8.74555	9.01738	7.34805	7.80917	6.32801	6.82241	1.77386	1.91649	2.48199	2.6549	4.08821	4.3945	5.41497	5.77668	6.68518	7.10676	6.82816	7.07349	3.18123	3.47685	3.51626	3.77361	4.27942	4.64052	5.16816	5.53827	7.35737	7.98107	6.98777	7.56944	7.67732	8.56589	8.86442
2008-01-30	6.61498	7.48914	3.6043	4.26369	4.72124	5.18527	4.37667	5.24332	4.87531	5.60914	5.30523	6.2256	2.76306	3.18562	3.43559	3.98042	8.58486	8.94227	6.94681	7.64721	5.79508	6.61561	1.51341	1.81892	2.11123	2.51947	3.58727	4.20816	4.96542	5.60334	6.25922	6.94005	6.36381	6.90459	2.85944	3.44942	3.15763	3.87843	3.89996	4.61074	4.80082	5.50956	7.0155	8.02848	6.42299	7.61133	7.25413	8.63382	8.95064
2008-01-31	6.72416	7.31723	3.59405	4.12773	4.62847	5.09561	4.43953	5.0728	4.91499	5.46662	5.34788	6.04883	2.99626	3.14967	3.75385	3.9337	8.85085	8.91486	7.35785	7.58939	6.19369	6.54276	1.54661	1.76995	2.13378	2.45633	3.69111	4.11035	5.14049	5.49923	6.61159	6.88109	6.47643	6.84676	2.98932	3.34609	3.54415	3.75874	4.06309	4.48409	4.97476	5.38138	7.18354	8.05531	6.40872	7.66692	7.53766	8.6641	9.41901
2008-02-01	6.74391	6.60084	3.70926	3.70876	4.80969	4.87693	4.51009	4.41356	4.99122	4.91715	5.4528	5.36084	3.02641	2.80835	3.76208	3.49694	8.7707	8.57364	7.37223	6.99556	6.33322	5.93237	1.68825	1.6291	2.3536	2.28685	3.93727	3.7723	5.30356	5.08033	6.69584	6.3502	6.78851	6.60791	3.02467	2.77208	3.3142	3.06108	4.09879	3.77848	4.99779	4.65071	7.46497	7.5177	6.82941	7.27043	7.89787	7.87131	8.84703
2008-02-02	6.57792	6.04726	3.52582	3.15516	4.62027	4.34158	4.31535	3.79294	4.81626	4.36707	5.22754	4.65637	2.73512	2.55662	3.40352	3.18615	8.54556	8.43695	6.89047	6.60872	5.75841	5.37977	1.5371	1.3492	2.15115	1.8823	3.61286	3.25188	4.96035	4.63965	6.22011	5.91835	6.39703	6.06075	3.01034	2.31761	3.39323	2.61876	4.08735	3.24337	4.9928	4.13487	7.32068	7.11245	6.85164	6.53256	7.65144	7.38714	8.87166
2008-02-03	6.39912	6.05687	3.46653	3.17657	4.62592	4.36696	4.16981	3.8088	4.69847	4.38183	5.08055	4.67529	2.46037	2.50283	3.08872	3.12871	8.34715	8.38614	6.43114	6.51061	5.21946	5.28862	1.36557	1.35213	1.91391	1.89125	3.23217	3.23246	4.56647	4.59347	5.76911	5.83478	6.05779	6.05112	2.69582	2.39772	3.40389	2.69409	3.69339	3.34889	4.5708	4.25666	6.98589	7.01157	6.43587	6.35937	7.20167	7.26396	8.55208
2008-02-04	6.05039	5.89301	3.20743	3.1129	4.41062	4.33999	3.81743	3.66727	4.39146	4.261	4.68744	4.51938	2.26003	2.36078	2.86114	2.97174	8.22155	8.28646	6.10522	6.27184	4.81002	5.01146	1.20418	1.27184	1.6839	1.7798	2.89723	3.04624	4.24868	4.397	5.43401	5.60138	5.7495	5.88521	2.30478	2.48565	2.89752	2.79924	3.22796	3.44922	4.11418	4.34577	6.64176	6.70841	6.03168	6.1506	6.73533	6.81529	8.34124
2008-02-05	5.41512	6.22266	3.02508	3.16148	4.33421	4.25872	3.28648	3.9119	3.92421	4.45671	4.06663	4.76577	1.98796	2.58489	2.61934	3.21829	8.05805	8.50981	5.63699	6.68251	4.29783	5.38513	1.13805	1.25305	1.58922	1.7296	2.65435	3.11323	3.94991	4.5833	4.98734	5.94612	5.53468	5.90849	1.96646	2.76665	2.38909	3.00847	2.80367	3.80141	3.64521	4.72028	6.36293	6.98923	5.65285	6.0314	6.37213	7.31155	8.98186
2008-02-06	4.97837	7.10772	2.40219	3.89211	3.70659	4.82766	2.72477	4.81942	3.43008	5.23351	3.44811	5.74411	1.90549	3.08847	2.45955	3.87797	8.01158	8.92909	5.53471	7.50761	4.0749	6.37554	0.894549	1.65787	1.23938	2.27533	2.26692	3.9109	3.66639	5.37676	4.83714	6.76014	5.16411	6.61045	1.73629	3.32137	2.12805	3.5305	2.5457	4.46639	3.42879	5.37337	6.26319	7.52699	5.43766	6.83917	6.26186	7.99873	8.51548
2008-02-07	5.70238	7.36574	2.7827	4.16312	3.96926	5.11527	3.39416	5.11926	4.01163	5.50481	4.20083	6.09576	2.32933	3.24858	2.90558	4.0653	8.31476	8.99739	6.26005	7.75029	4.87971	6.73831	1.06556	1.86982	1.47217	2.58719	2.72466	4.30697	4.19367	5.70246	5.52801	7.04094	5.56252	6.99062	2.37849	3.59247	2.65629	3.81528	3.34322	4.78684	4.27727	5.68059	6.61691	7.81518	5.6135	7.28329	6.79986	8.3638	9.46498
2008-02-08	6.64307	7.18676	3.50299	4.02203	4.52974	5.01734	4.34275	4.94058	4.82698	5.35428	5.2337	5.90799	2.77158	3.17706	3.45033	3.9677	8.63346	8.93136	6.97967	7.63218	5.77471	6.60144	1.43987	1.81635	1.99399	2.51751	3.47324	4.20218	4.91014	5.5937	6.25855	6.9275	6.24032	6.90111	3.08438	3.30392	3.38276	3.61553	4.1818	4.43315	5.09032	5.32044	7.04919	7.67332	6.26003	7.28968	7.35223	8.12587	9.87346
2008-02-09	6.94282	7.11931	3.83113	3.94848	4.87641	4.93854	4.69524	4.86108	5.14553	5.2822	5.64565	5.81454	2.83276	3.1939	3.52135	3.9998	8.63393	8.97054	7.05971	7.66655	5.93718	6.61686	1.57464	1.80116	2.197	2.4871	3.70881	4.1784	5.08027	5.5946	6.37478	6.94625	6.47442	6.86832	2.98357	3.14282	3.19554	3.47738	4.04828	4.24893	4.9384	5.15194	7.31374	7.5212	6.63385	7.00004	7.69639	7.94734	8.7301
2008-02-10	6.79013	7.33826	3.70666	4.10877	4.77566	5.02395	4.53815	5.06998	5.01008	5.45298	5.4741	6.02359	2.80533	3.47215	3.48883	4.4222	8.63313	9.28784	7.02391	8.1297	5.86445	7.11477	1.51376	1.98574	2.10552	2.70318	3.60282	4.52296	5.00366	5.98989	6.32283	7.36554	6.36928	7.13604	2.72925	3.44542	3.0344	3.88768	3.74604	4.61558	4.64341	5.51717	7.31384	7.8183	6.76267	7.19484	7.6631	8.39165	8.64326
2008-02-11	6.92315	7.31854	3.76723	4.13783	4.77481	5.11525	4.64893	5.07958	5.0964	5.47468	5.57782	6.06051	2.95891	3.42684	3.69107	4.2899	8.78195	9.11183	7.28566	8.03035	6.14749	7.11549	1.59477	2.06367	2.20559	2.86245	3.77939	4.67311	5.20963	6.02723	6.56391	7.34059	6.51285	7.33007	2.83861	3.57546	3.19347	4.10082	3.88546	4.76578	4.79554	5.65702	7.37293	8.02403	6.73229	7.60912	7.76955	8.627	8.73279
2008-02-12	7.59584	7.31279	4.31223	4.0923	5.11256	5.02095	5.3133	5.04762	5.646	5.43586	6.25384	6.00358	3.4818	3.39633	4.47246	4.29453	9.35697	9.18261	8.15258	8.002	7.09535	6.9904	1.95557	1.94456	2.63809	2.66404	4.45534	4.45127	5.96563	5.89239	7.35862	7.25826	7.0497	7.09065	3.48191	3.41085	3.82407	3.85013	4.6637	4.56698	5.56904	5.45911	7.99774	7.94733	7.30385	7.57731	8.6607	8.50786	9.31749
2008-02-13	7.99247	7.29111	4.69831	4.11064	5.48719	5.08863	5.75483	5.04883	6.03791	5.44733	6.75676	6.0254	3.88933	3.33827	5.01952	4.17511	9.65901	9.04723	8.79103	7.88918	7.93416	6.93349	2.39386	1.97595	3.24383	2.74032	5.26168	4.5064	6.69564	5.87357	8.02674	7.19432	7.78168	7.17843	3.95757	3.27647	4.22165	3.66896	5.2249	4.40724	6.1052	5.30454	8.53481	7.71526	8.18547	7.32485	9.32276	8.18669	9.94132
2008-02-14	7.71846	6.85346	4.47625	3.80525	5.37317	4.89501	5.49046	4.6266	5.82465	5.09312	6.49934	5.58279	3.76004	3.037	4.76866	3.77559	9.43813	8.77967	8.57442	7.38987	7.74727	6.35368	2.33223	1.75741	3.20646	2.45246	5.176	4.06868	6.54523	5.41941	7.8614	6.7129	7.75444	6.80154	3.7813	3.03731	4.13303	3.45805	5.00961	4.11431	5.89035	5.00662	8.42977	7.33603	8.26703	6.90501	9.13099	7.66318	10.6642
2008-02-15	6.81317	6.77219	3.86677	3.64502	5.00748	4.68113	4.62804	4.49516	5.10379	4.965	5.5996	5.41242	3.21648	3.10326	3.99664	3.89327	8.88464	8.93079	7.66972	7.5289	6.74012	6.41222	1.9618	1.6823	2.74598	2.31249	4.4546	3.9562	5.75491	5.41123	7.01806	6.78765	7.1631	6.65538	2.99886	2.87676	3.25085	3.36573	4.05571	3.92642	4.92505	4.82819	7.63682	7.38269	7.49283	6.68881	8.01222	7.79713	10.0698
2008-02-16	6.15212	7.22839	3.24384	4.00757	4.42073	4.93562	3.90349	4.95205	4.46403	5.35038	4.78047	5.89344	2.91374	3.44992	3.62537	4.37992	8.71618	9.24896	7.20114	8.09126	6.08118	7.08337	1.60255	1.97886	2.22773	2.70192	3.78018	4.5131	5.17656	5.96664	6.50042	7.33703	6.52805	7.13608	2.55184	3.00487	2.90237	3.37805	3.5349	4.08441	4.43565	4.99166	7.19052	7.67386	6.61175	7.07958	7.49667	8.1812	9.92905
2008-02-17	6.49043	7.3627	3.3935	4.16241	4.45932	5.11742	4.1945	5.11733	4.70265	5.50367	5.07854	6.09471	3.14726	3.55208	3.95658	4.49191	8.97671	9.28207	7.60224	8.24563	6.49326	7.3209	1.712	2.11785	2.34904	2.91007	4.01376	4.77646	5.47492	6.17914	6.8556	7.52012	6.70212	7.39238	2.87467	3.13238	3.16295	3.50345	3.93348	4.23561	4.84896	5.13723	7.59066	7.91741	6.82326	7.41334	8.10887	8.5002	9.25879
2008-02-18	7.10125	7.17383	3.90297	4.01143	4.86202	5.00919	4.82379	4.92736	5.24238	5.34299	5.75899	5.89378	3.59738	3.50293	4.61438	4.42294	9.42222	9.23805	8.33184	8.16648	7.34613	7.22482	2.09115	2.07359	2.83344	2.85144	4.71026	4.69409	6.18508	6.09857	7.55591	7.44191	7.28941	7.32064	3.28204	3.18606	3.71154	3.49768	4.41904	4.30081	5.32237	5.20175	8.07177	7.99463	7.57175	7.58979	8.71545	8.58318	10.5124
2008-02-19	7.18691	7.31054	4.02604	4.08191	5.02508	4.99832	4.94295	5.03927	5.35718	5.42581	5.9122	5.9888	3.58611	3.63445	4.5146	4.64521	9.2645	9.41935	8.29154	8.38665	7.41878	7.44163	2.18894	2.1494	3.02404	2.92557	4.91152	4.82441	6.27324	6.27091	7.59104	7.62805	7.53228	7.40529	3.20069	3.42793	3.68504	3.66967	4.3127	4.59443	5.20507	5.4955	8.15145	8.09699	7.81512	7.67204	8.78558	8.73178	10.4906
2008-02-20	7.26948	7.99319	4.05033	4.68284	4.98089	5.38207	4.99964	5.72639	5.39341	5.99378	5.94922	6.68476	3.58352	4.05469	4.56993	5.33135	9.36941	9.90514	8.30499	9.05284	7.34454	8.19468	2.10352	2.52313	2.86665	3.37036	4.74173	5.44982	6.18842	6.92715	7.54888	8.24571	7.33511	7.90044	3.228	3.88872	3.45103	4.14816	4.35421	5.14449	5.25883	6.0302	8.05129	8.46722	7.70333	8.05791	8.64815	9.24366	10.4014
2008-02-21	7.64841	7.80012	4.37693	4.57638	5.21547	5.49975	5.38667	5.59548	5.71959	5.92404	6.35489	6.63122	3.73811	3.86608	4.77976	4.88927	9.48971	9.48093	8.5488	8.73626	7.65908	7.98833	2.26356	2.46933	3.08599	3.40955	5.03684	5.43559	6.45999	6.75903	7.80063	8.04853	7.6008	8.00457	3.58265	3.55649	3.94359	3.89957	4.77989	4.73447	5.67624	5.61318	8.27091	8.30027	7.82381	8.14721	8.98022	8.94754	10.6579
2008-02-22	7.03129	6.83752	4.03379	3.83783	5.14534	4.95397	4.84983	4.63144	5.2964	5.10244	5.84537	5.59673	3.36029	3.34108	4.18351	4.17131	9.00716	9.03004	7.90774	7.88834	7.01952	6.95295	2.06758	2.00129	2.88721	2.78224	4.668	4.55107	5.97345	5.89852	7.24959	7.20545	7.34892	7.22703	3.07067	2.91584	3.40541	3.30054	4.14228	3.96491	5.01157	4.85071	7.76362	7.72574	7.62505	7.45953	8.1894	8.1692	10.1828
2008-02-23	6.62429	6.62635	3.51518	3.52226	4.56885	4.57983	4.33855	4.34352	4.82878	4.83401	5.23933	5.24651	3.24164	3.21819	4.08272	4.0337	9.0519	8.99403	7.75351	7.70674	6.68332	6.66275	1.80142	1.8189	2.47126	2.50979	4.18277	4.21288	5.63458	5.63106	7.00922	6.9844	6.85338	6.89732	2.85297	3.04304	3.17493	3.20964	3.90675	4.13787	4.82112	5.05258	7.4225	7.63512	6.8587	7.05719	7.8194	8.12247	10.0916
2008-02-24	6.8801	7.49968	3.76523	4.21786	4.80932	5.01807	4.62307	5.20523	5.08085	5.54947	5.56235	6.12947	3.37527	3.70175	4.24384	4.81056	9.12113	9.58458	7.95943	8.50207	6.97745	7.50714	1.96409	2.15843	2.70752	2.89291	4.48847	4.80957	5.89375	6.32147	7.23948	7.69403	7.143	7.34488	3.08488	3.75958	3.44722	4.11551	4.17895	4.9937	5.0801	5.88605	7.64628	8.17075	7.01657	7.5869	8.15156	8.87457	10.2649
2008-02-25	7.00301	8.12359	3.84016	4.81423	4.83981	5.54919	4.73481	5.88366	5.17144	6.14165	5.67332	6.88136	3.56868	4.13435	4.55737	5.40705	9.37051	9.92041	8.28319	9.17619	7.30633	8.38696	2.07982	2.62731	2.8293	3.53266	4.69562	5.65816	6.15382	7.09358	7.52008	8.39457	7.28837	8.10796	3.30649	4.18672	3.50805	4.55999	4.44968	5.49724	5.35359	6.36696	7.87124	8.41809	7.37689	8.14139	8.4329	9.14302	10.3719
2008-02-26	7.49894	8.15979	4.23242	4.85205	5.07839	5.59999	5.22142	5.92855	5.57358	6.18445	6.16803	6.93869	4.03444	4.11724	5.3009	5.33055	9.88625	9.83334	9.02142	9.14724	8.15564	8.39968	2.50199	2.63929	3.343	3.58035	5.41328	5.70914	6.89249	7.10247	8.21441	8.3976	7.86902	8.18544	3.72315	4.2803	3.9521	4.62912	4.94816	5.60729	5.83977	6.4712	8.04961	8.66818	7.59839	8.36108	8.67209	9.49689	10.1422
2008-02-27	7.84518	7.14368	4.56346	4.15564	5.38257	5.26823	5.60048	4.98018	5.90644	5.41285	6.59238	5.99484	4.14595	3.40827	5.37163	4.23337	9.85787	8.99911	9.19216	7.96962	8.45667	7.15121	2.66923	2.17658	3.62031	3.05379	5.76265	4.86104	7.1524	6.11028	8.44324	7.34337	8.23263	7.54304	3.72211	3.29878	4.08505	3.74179	4.94015	4.41229	5.82418	5.27071	8.22117	7.8955	7.83309	7.9185	8.89613	8.33317	9.25301
2008-02-28	7.905	6.10131	4.61675	3.26203	5.41976	4.46463	5.66168	3.87605	5.9577	4.44357	6.65577	4.75412	4.07956	2.88198	5.29598	3.58322	9.82876	8.67868	9.08956	7.14379	8.30727	6.0288	2.58767	1.59947	3.49957	2.22843	5.60643	3.76518	7.02177	5.1456	8.3265	6.45289	8.08258	6.52111	3.78679	2.48544	4.09131	2.83827	5.02258	3.44904	5.91027	4.3347	8.44381	7.36228	8.09834	6.82091	9.19567	7.72877	10.7416
2008-02-29	8.42417	5.42654	5.103	3.01362	5.68008	4.32026	6.17616	3.29042	6.37035	3.92828	7.14875	4.07374	4.31364	2.60158	5.72498	3.25417	10.1487	8.43566	9.45233	6.65852	8.69121	5.51182	2.79716	1.49211	3.72305	2.09433	5.91829	3.48609	7.37108	4.80142	8.6433	6.00606	8.30159	6.2924	4.43079	2.01294	3.85993	2.10429	5.78666	2.85987	6.64443	3.69026	8.73941	6.67542	8.47263	6.3501	9.58548	6.71203	10.9472
2008-03-01	8.31651	5.36515	5.01334	2.50934	5.79135	3.73136	6.11503	3.04386	6.3573	3.70529	7.16637	3.80888	4.24284	2.64906	5.49732	3.29775	9.92214	8.55119	9.34286	6.78426	8.6608	5.51991	2.77869	1.31891	3.77434	1.82314	5.96519	3.2397	7.33115	4.69707	8.60475	6.05389	8.41947	6.02551	4.26539	2.07622	3.7578	2.24011	5.58505	2.98236	6.44568	3.91544	8.43461	6.81119	8.36086	5.75279	9.11545	7.087	10.5269
2008-03-02	8.40379	5.87864	5.0817	3.10557	5.67478	4.33505	6.15731	3.65407	6.35676	4.24954	7.13405	4.50455	4.36023	2.79778	5.81311	3.47824	10.2132	8.609	9.52256	7.00294	8.76586	5.8661	2.84231	1.54438	3.77064	2.15471	5.98236	3.64857	7.44148	5.02303	8.7044	6.31688	8.34581	6.41973	4.45942	2.51194	4.76879	2.86029	5.82036	3.48267	6.67619	4.37197	8.39084	7.01246	8.03359	6.41345	9.12496	7.25153	9.76414
2008-03-03	8.61434	6.29623	5.28337	3.19946	5.91769	4.26933	6.40379	3.97629	6.58524	4.50866	7.43561	4.82958	4.52136	3.03512	5.99529	3.80889	10.2849	8.89067	9.77358	7.42279	9.1289	6.26549	3.03598	1.60413	4.05856	2.20035	6.35719	3.80906	7.75649	5.28344	8.98884	6.67187	8.70639	6.5176	4.4358	2.86219	5.01338	3.25962	5.78888	3.92438	6.64344	4.84569	8.43369	7.26848	8.18239	6.46994	9.15846	7.66346	9.49507
2008-03-04	8.1869	7.82869	4.8902	4.52229	5.68161	5.17611	5.97428	5.52937	6.23443	5.80851	7.01031	6.43821	4.21972	3.88624	5.44739	5.14731	9.8782	9.84004	9.30551	8.79137	8.63034	7.80931	2.76552	2.31548	3.76715	3.05857	5.95068	5.04595	7.30431	6.59229	8.5778	7.94483	8.41743	7.50877	4.05455	4.03562	4.76097	4.49552	5.33616	5.32375	6.20796	6.20492	8.05298	8.43112	7.84789	7.6872	8.61389	9.27303	9.90313
2008-03-05	7.41752	8.03557	4.26279	4.772	5.26386	5.6354	5.20588	5.83294	5.59238	6.12343	6.21502	6.87889	3.72719	4.06134	4.70434	5.20596	9.37611	9.71853	8.51638	9.05481	7.70399	8.33118	2.32718	2.61557	3.2132	3.57691	5.17034	5.68852	6.51536	7.04461	7.82074	8.33494	7.76445	8.19682	3.4365	4.07229	4.33564	4.60907	4.59127	5.3555	5.47198	6.22343	7.75841	8.46766	7.34157	8.42838	8.25428	9.15298	9.37728
2008-03-06	7.02423	7.73078	3.87233	4.45609	4.88226	5.28935	4.76498	5.47727	5.20052	5.7994	5.71207	6.45681	3.56751	3.92541	4.52881	5.06615	9.32336	9.68285	8.27489	8.84723	7.33338	8.01025	2.11082	2.43443	2.88943	3.30101	4.76037	5.33698	6.18404	6.76214	7.5349	8.08697	7.36577	7.8512	3.25512	3.9294	3.86908	4.40486	4.38668	5.19234	5.28946	6.0732	7.76124	8.38987	7.25544	8.03675	8.28126	9.1226	8.94295
2008-03-07	7.25069	8.16739	4.03413	4.85086	4.96838	5.52974	4.98021	5.91566	5.37684	6.15857	5.92843	6.89359	3.68274	4.15923	4.70321	5.4682	9.44448	9.97538	8.46129	9.21496	7.54777	8.41414	2.20741	2.64192	3.00989	3.53684	4.93388	5.66826	6.36401	7.12001	7.71128	8.41924	7.50899	8.10141	3.46694	4.23166	3.72759	4.78696	4.63971	5.55156	5.53705	6.41931	7.88128	8.67816	7.39718	8.38927	8.44437	9.50633	9.64953
2008-03-08	7.366	8.41556	4.16005	5.0916	5.1081	5.76441	5.11742	6.19199	5.50229	6.40406	6.09194	7.20882	3.60716	4.25031	4.55645	5.55216	9.30738	9.98957	8.33004	9.35609	7.44416	8.63618	2.18716	2.76197	3.01176	3.72518	4.90712	5.90985	6.2882	7.31186	7.61617	8.59095	7.51727	8.34319	3.51942	4.48521	3.87516	5.02379	4.69983	5.85	5.59251	6.70352	7.62208	8.66176	7.27267	8.52391	8.04481	9.44751	10.11
2008-03-09	7.54869	8.45622	4.2876	5.13022	5.14752	5.78054	5.28301	6.23112	5.63153	6.43436	6.24491	7.24398	3.72901	4.27361	4.80154	5.61434	9.53653	10.0475	8.53986	9.39231	7.60649	8.65735	2.22261	2.77359	3.00871	3.72339	4.94825	5.91246	6.41018	7.33342	7.76545	8.61116	7.49868	8.32806	3.45691	4.71218	4.07103	5.15232	4.62389	6.11663	5.51774	6.95682	7.59181	8.73747	6.99786	8.50595	8.06566	9.57453	9.06431
2008-03-10	7.69888	8.45733	4.43961	5.13177	5.30631	5.79687	5.45497	6.23657	5.78655	6.44226	6.44561	7.25672	3.88984	4.31796	5.00123	5.67358	9.63072	10.0788	8.78959	9.46103	7.95333	8.74944	2.40943	2.82356	3.27666	3.79274	5.29866	6.00358	6.71351	7.41451	8.0387	8.68407	7.82694	8.41124	3.64303	4.5281	4.14702	5.10672	4.85071	5.8986	5.74508	6.74827	8.10159	8.75894	7.5091	8.61695	8.78032	9.58293	9.37647
2008-03-11	7.09146	7.81815	4.03086	4.59547	5.10715	5.52011	4.88782	5.61652	5.32362	5.94309	5.87772	6.65593	3.48528	3.89074	4.3513	4.92121	9.11918	9.49784	8.11418	8.77497	7.26032	8.03991	2.16121	2.49599	3.01044	3.44699	4.85308	5.48543	6.16412	6.80364	7.44902	8.08955	7.5083	8.05038	3.25183	4.09428	3.8555	4.44949	4.36503	5.38391	5.24445	6.25308	7.65269	8.28841	7.50812	8.19198	8.03472	8.91654	8.80343
2008-03-12	7.00695	7.89773	3.80464	4.59108	4.75884	5.30317	4.71476	5.62323	5.14398	5.90433	5.63162	6.57173	3.42075	3.93543	4.34634	5.15199	9.23649	9.79338	8.04665	8.86741	7.01751	7.96488	1.94164	2.39959	2.64699	3.2105	4.44271	5.23584	5.90832	6.72354	7.28581	8.06127	7.06848	7.71655	3.27927	4.4148	3.87869	4.74684	4.41963	5.76851	5.32969	6.62689	7.69424	8.35434	6.98836	7.92072	8.2386	9.09297	9.05387
2008-03-13	7.54251	8.65203	4.28691	5.32697	5.15817	5.8704	5.28077	6.42295	5.63193	6.58388	6.24722	7.418	3.75902	4.56689	4.83547	6.18701	9.54897	10.4702	8.58601	9.82953	7.67446	9.11161	2.26029	3.05954	3.06462	4.01387	5.02023	6.30109	6.4699	7.7692	7.81842	8.98347	7.56801	8.58305	3.57063	5.01538	4.02711	5.45326	4.76072	6.47058	5.6533	7.29044	8.09659	8.91754	7.62847	8.61739	8.74212	9.83699	9.24639
2008-03-14	7.66166	9.40963	4.40595	6.14022	5.27895	6.39834	5.41574	7.21345	5.75284	7.23407	6.40319	8.2056	3.87996	4.97112	4.98616	6.79296	9.62063	10.8167	8.77388	10.4367	7.93474	9.89335	2.4003	3.52411	3.26514	4.6164	5.28264	7.08115	6.69748	8.48254	8.02357	9.60249	7.81353	9.25844	3.77475	5.4451	4.04639	5.91979	5.00639	6.96904	5.89605	7.75797	8.30848	9.35874	7.94443	9.29365	9.01196	10.3828	10.2939
2008-03-15	7.76625	9.49332	4.48759	6.16875	5.31186	6.5608	5.51369	7.33054	5.83001	7.36404	6.49478	8.39665	3.95142	4.86519	5.10989	6.51361	9.71498	10.5935	8.88869	10.2976	8.05561	9.79291	2.45635	3.41594	3.32611	4.55076	5.37301	7.00233	6.8015	8.35617	8.12446	9.51747	7.87862	9.26316	4.04402	5.34167	4.33074	5.81693	5.32534	6.85191	6.20321	7.65117	8.38857	9.50267	8.09533	9.57882	9.10599	10.5464	10.4547
2008-03-16	8.31557	9.07836	4.9948	5.74184	5.61064	6.25547	6.06438	6.89267	6.27842	6.99721	7.03707	7.94536	4.22739	4.62155	5.58573	6.13504	10.0579	10.362	9.32002	9.92779	8.53271	9.332	2.70787	3.14857	3.61307	4.2113	5.77179	6.55748	7.22766	7.93706	8.51577	9.14987	8.18113	8.88605	4.59203	5.01057	4.94549	5.67519	5.97233	6.46595	6.82188	7.28752	8.81261	9.20683	8.47783	9.33264	9.7016	10.1357	10.5688
2008-03-17	8.39901	9.41411	5.08066	6.14167	5.8007	6.40602	6.18787	7.21945	6.41019	7.24058	7.2248	8.21509	4.22219	4.85749	5.47962	6.65101	9.92129	10.75	9.31123	10.261	8.60905	9.64891	2.74982	3.3909	3.72854	4.42598	5.90708	6.83285	7.28607	8.26794	8.56503	9.41012	8.36073	9.02626	4.58024	5.31475	5.18563	5.93118	5.95613	6.8176	6.80511	7.61529	8.80799	9.35822	8.75593	9.26788	9.62922	10.3873	10.9211
2008-03-18	8.25684	9.73572	4.94016	6.44936	5.64686	6.70847	6.02422	7.57718	6.26127	7.55874	7.03067	8.62414	4.10433	5.139	5.33064	7.05629	9.84874	10.9698	9.12822	10.684	8.35718	10.2066	2.61413	3.7203	3.53538	4.86277	5.65409	7.3969	7.06555	8.77399	8.36632	9.85022	8.12512	9.52431	4.36758	5.51378	5.08757	6.0347	5.70627	7.05036	6.5671	7.83578	8.54245	9.47718	8.38808	9.56703	9.28591	10.5095	10.7564
2008-03-19	8.35371	9.29886	5.03179	5.95963	5.70928	6.44126	6.12404	7.13191	6.34435	7.20438	7.1327	8.20669	4.14668	5.03372	5.4105	6.80904	9.91142	10.7875	9.19504	10.5456	8.42407	10.0824	2.64789	3.60147	3.56873	4.76534	5.70318	7.2798	7.12529	8.63105	8.42242	9.74926	8.15646	9.47764	4.34488	5.1108	5.15307	5.63627	5.68061	6.58312	6.54285	7.39849	8.44206	9.05043	8.18545	9.17255	9.17142	9.92224	10.712
2008-03-20	8.50008	9.4539	5.17276	6.18138	5.80101	6.4414	6.27419	7.26311	6.46827	7.27872	7.28386	8.26348	4.3466	5.27545	5.7622	7.36807	10.1633	11.1843	9.50364	10.854	8.76554	10.3681	2.83692	3.89017	3.78217	5.01077	5.9952	7.56838	7.43562	8.96515	8.70152	9.97853	8.37559	9.60426	4.71273	5.40278	5.25087	5.95284	6.11453	6.91845	6.95594	7.70904	8.649	9.15079	8.34958	8.98745	9.46863	10.1235	10.9047
2008-03-21	8.78666	10.2219	5.45996	7.05574	5.98204	7.04454	6.56854	8.08009	6.70956	7.95859	7.57621	9.09224	4.59071	5.70126	6.15214	8.04966	10.4102	11.5601	9.8748	11.4529	9.21818	11.1305	3.09879	4.41861	4.10804	5.65508	6.42446	8.37368	7.84802	9.69681	9.06393	10.5763	8.73248	10.2651	5.00038	6.28015	5.53224	6.796	6.45099	7.91862	7.27392	8.63505	8.77758	9.8539	8.61105	9.82267	9.61445	11.0297	10.9385
2008-03-22	9.39281	10.3162	6.11486	7.08098	6.39422	7.17608	7.19817	8.19926	7.22441	8.08357	8.19688	9.27169	5.01	5.76245	6.91511	8.07254	10.9141	11.5519	10.4796	11.5701	9.91106	11.3184	3.56928	4.4788	4.63405	5.78176	7.09636	8.55208	8.52092	9.83882	9.61804	10.7252	9.23224	10.4655	5.23051	6.30679	5.80256	6.84712	6.71816	7.96254	7.52497	8.68643	9.0943	10.023	8.90731	10.3309	10.0521	11.19	11.1178
2008-03-23	9.46059	10.5876	6.13631	7.48203	6.53218	7.34807	7.29475	8.47233	7.33284	8.28741	8.35713	9.49483	5.1604	5.95265	7.04959	8.48026	10.9485	11.7943	10.725	11.7819	10.2826	11.5379	3.7455	4.74871	4.92014	6.03098	7.4753	8.82798	8.83032	10.1105	9.90933	10.8928	9.61599	10.6112	5.29686	6.77235	5.85869	7.29984	6.7964	8.47352	7.59919	9.14689	9.53484	10.298	9.50721	10.5284	10.6102	11.5571	11.4698
2008-03-24	8.97544	10.5222	5.63613	7.30327	6.19868	7.34968	6.78924	8.42201	6.91472	8.27354	7.84766	9.508	4.81906	5.83699	6.40962	8.14282	10.5121	11.5761	10.2314	11.6942	9.73326	11.502	3.37188	4.56212	4.51474	5.91762	6.95473	8.73432	8.2941	9.99068	9.46773	10.8699	9.243	10.6499	4.87442	6.43942	5.35061	7.02607	6.30413	8.11771	7.13492	8.8334	9.50856	10.4303	9.67147	10.8446	10.5364	11.6971	11.4051
2008-03-25	8.71829	9.92501	5.38566	6.62622	5.97433	6.89224	6.50808	7.78941	6.66902	7.74938	7.53562	8.871	4.57297	5.36294	6.07224	7.32025	10.3307	11.0852	9.85268	11.034	9.22929	10.7024	3.09249	3.98294	4.13228	5.24827	6.45419	7.90122	7.84663	9.20444	9.06883	10.2401	8.79057	10.0046	4.74388	5.72819	5.17226	6.2294	6.1517	7.30074	6.99081	8.07299	9.19377	10.0337	9.28383	10.4739	10.1259	11.1796	11.1762
2008-03-26	9.20887	9.17556	5.92	5.83241	6.24781	6.36577	7.00128	7.00597	7.05789	7.10231	7.99083	8.08426	4.84808	4.84982	6.63464	6.45607	10.7397	10.5398	10.2474	10.2782	9.63274	9.79259	3.38006	3.40592	4.41337	4.55878	6.8168	7.01242	8.2524	8.34774	9.39726	9.51496	9.01375	9.29274	5.21461	5.08808	5.55319	5.62052	6.69985	6.55625	7.50562	7.37321	9.4124	9.67379	9.32605	9.90145	10.4589	10.7443	11.4386
2008-03-27	9.75649	8.72726	6.49146	5.39367	6.70184	5.99236	7.59254	6.5207	7.56339	6.68232	8.62158	7.55452	5.25846	4.71403	7.2984	6.33924	11.1297	10.5211	10.8432	10.0617	10.3779	9.4553	3.86512	3.23661	5.00833	4.2858	7.57366	6.65648	8.95588	8.06327	9.98611	9.25245	9.63729	8.93209	5.93702	4.9846	6.38665	5.65967	7.52947	6.43494	8.27752	7.25776	9.92499	9.36255	10.0073	9.50397	11.1022	10.344	11.7558
2008-03-28	10.5044	8.97502	7.41489	5.65866	7.26588	6.10072	8.37812	6.76179	8.20094	6.86622	9.38087	7.76398	5.76156	4.95508	8.1986	6.78049	11.6521	10.8151	11.5106	10.4103	11.1783	9.85211	4.50958	3.50503	5.72606	4.58438	8.44504	7.03872	9.77288	8.44859	10.6116	9.57025	10.2832	9.21464	6.66875	5.27632	7.13109	6.01123	8.35781	6.77296	9.04203	7.57507	10.4478	9.33755	10.7109	9.33525	11.7415	10.3411	12.0656
2008-03-29	10.2635	9.5559	6.97589	6.28489	7.17822	6.53011	8.15637	7.37444	8.06486	7.37529	9.26633	8.3853	5.60104	5.22406	7.7016	7.22003	11.3067	11.076	11.3797	10.8004	11.1376	10.337	4.26562	3.82216	5.59717	4.97071	8.34484	7.53008	9.61456	8.90755	10.5837	9.95366	10.3723	9.6167	6.17633	5.73756	6.65049	6.40999	7.81757	7.30437	8.55667	8.06991	10.5256	9.68241	11.0038	9.70152	11.8084	10.7964	12.1161
2008-03-30	9.46263	9.31113	6.13146	5.97	6.55082	6.45891	7.30169	7.14726	7.34363	7.21953	8.37516	8.2275	5.13758	5.00285	6.96618	6.71204	10.8779	10.7047	10.7012	10.5072	10.282	10.0665	3.72098	3.57249	4.91941	4.75903	7.47902	7.27378	8.81371	8.60226	9.90729	9.73418	9.64924	9.50306	5.60374	5.44089	6.24165	6.02524	7.15497	6.9674	7.93571	7.76079	9.94046	9.79984	10.4149	10.0029	11.0499	10.9164	11.4443
2008-03-31	9.76592	8.33816	6.54194	5.0415	6.67177	5.8398	7.5911	6.14694	7.54743	6.39008	8.58694	7.21191	4.97658	4.62784	6.75201	6.1289	10.7694	10.3486	10.4546	9.93855	9.947	9.35751	3.93428	3.01762	5.06829	4.0865	7.64185	6.38339	9.03072	7.72696	9.64321	9.16892	9.33963	8.92241	6.02342	4.47805	6.1108	5.31952	7.62841	5.8353	8.36839	6.68411	10.1125	9.05571	10.2337	9.32007	11.3375	9.89589	11.8807
2008-04-01	8.86313	8.24096	5.54355	4.92156	6.29913	5.57338	6.72117	5.99046	6.89391	6.21978	7.85386	6.96777	4.37015	4.59337	5.61537	6.14226	9.93857	10.3963	9.53733	9.88033	8.97235	9.23518	3.20548	2.98257	4.41023	3.94819	6.78541	6.21562	8.0112	7.66233	8.84436	9.07651	8.76655	8.75908	4.77127	4.41111	4.87854	4.90874	6.17662	5.76294	7.0068	6.62149	9.22635	8.98324	9.69577	8.77296	10.0827	9.90639	9.95363
2008-04-02	7.98791	8.36888	4.69191	5.04992	5.47405	5.76107	5.74731	6.15125	6.02977	6.37564	6.74516	7.17876	4.10792	4.54089	5.37098	6.00485	9.90057	10.2781	9.13513	9.80476	8.33282	9.18363	2.59817	3.06348	3.49267	4.10631	5.60535	6.41852	7.04596	7.80209	8.35157	9.03077	8.06021	8.77152	4.23262	4.78783	4.6377	5.19047	5.55136	6.20471	6.41925	7.04033	8.68863	9.10729	8.52084	9.06453	9.49194	10.0379	9.74771
2008-04-03	8.40776	8.35277	5.08492	5.03049	5.6852	5.70119	6.16356	6.12102	6.3638	6.34025	7.14438	7.12625	4.54074	4.4749	6.12984	5.92689	10.4271	10.2446	9.79252	9.70222	9.07637	9.03779	3.03274	2.98506	3.99007	3.99159	6.27052	6.26903	7.73246	7.67495	8.95452	8.91628	8.56741	8.62937	4.79088	4.72655	5.33651	5.28707	6.2053	6.13066	7.04173	6.97069	9.07335	9.0173	8.83498	8.98072	10.035	9.91353	11.2216
2008-04-04	9.24036	8.87476	5.95601	5.56086	6.26866	6.00969	7.03377	6.65119	7.08401	6.76884	8.02183	7.63969	5.08104	4.73515	7.02952	6.42953	10.9809	10.6049	10.5827	10.0848	10.0404	9.44573	3.65359	3.2525	4.73772	4.27036	7.22811	6.63449	8.64299	8.07056	9.72015	9.24787	9.34107	8.87767	5.44021	5.01795	5.90633	5.66605	6.96144	6.47275	7.74993	7.29251	9.64747	9.33461	9.6217	9.20847	10.7589	10.363	10.5522
2008-04-05	9.57813	9.48057	6.27587	6.1961	6.59236	6.48047	7.41119	7.29687	7.42148	7.31341	8.45736	8.31244	5.22434	5.07763	7.15985	6.98093	11.0168	10.9352	10.8167	10.5888	10.3928	10.0734	3.8204	3.64831	5.00779	4.75905	7.58629	7.26154	8.93661	8.65747	9.99675	9.74546	9.70306	9.39703	5.7797	5.49209	6.3233	6.12473	7.35483	7.02252	8.11878	7.80794	9.82196	9.66659	10.0232	9.74237	10.9459	10.7647	10.6611
2008-04-06	9.06909	9.40849	5.72637	6.0803	6.29008	6.49737	6.89429	7.24078	7.00875	7.28881	7.96901	8.30412	4.87656	5.02899	6.50204	6.79972	10.5703	10.781	10.3183	10.5389	9.8394	10.0752	3.43436	3.59627	4.59217	4.75998	7.05624	7.27299	8.39137	8.62383	9.55259	9.74347	9.32712	9.4731	5.37947	5.69162	5.91904	6.28171	6.89617	7.25411	7.69383	8.02572	9.51194	9.70388	9.7392	9.87977	10.5273	10.7946	10.902
2008-04-07	8.83541	9.01064	5.50588	5.67365	6.03353	6.20669	6.6243	6.82147	6.76046	6.93755	7.64277	7.8719	4.65651	4.6865	6.21871	6.20745	10.4306	10.3897	9.97839	10.0291	9.37313	9.47923	3.17915	3.2269	4.23205	4.32832	6.58604	6.70979	7.9807	8.06462	9.18497	9.26516	8.89181	9.03309	5.13891	5.29248	5.65873	5.91043	6.61517	6.79352	7.42788	7.59762	9.28876	9.37328	9.34079	9.55565	10.2635	10.3496	10.8604
2008-04-08	8.82019	9.04921	5.4858	5.72897	6.05414	6.17359	6.61699	6.84516	6.76213	6.94113	7.65205	7.86096	4.64888	4.7399	6.2126	6.42371	10.4302	10.5948	9.9662	10.0941	9.35377	9.46613	3.16944	3.25938	4.21618	4.28729	6.56539	6.65709	7.96441	8.08542	9.16994	9.26345	8.8707	8.90506	5.07114	5.41997	5.7486	5.94429	6.53637	6.93763	7.35372	7.72891	9.29037	9.23783	9.29008	9.23257	10.277	10.207	11.1698
2008-04-09	8.82388	9.56269	5.49316	6.29505	6.03119	6.53221	6.61383	7.38073	6.75319	7.3794	7.63522	8.38918	4.60417	5.18935	6.12429	7.21228	10.365	11.0896	9.89999	10.7364	9.28526	10.2291	3.12526	3.78394	4.17169	4.89221	6.50628	7.42231	7.89805	8.82524	9.11385	9.86904	8.83244	9.49569	5.0578	6.01758	5.63501	6.63647	6.52078	7.62012	7.33881	8.36341	9.32451	9.67033	9.34631	9.63262	10.3184	10.7912	11.2602
2008-04-10	8.91141	9.68419	5.58083	6.38305	6.09741	6.68363	6.70672	7.52672	6.83181	7.52154	7.73276	8.58349	4.67917	5.26525	6.29193	7.21009	10.4962	11.0399	10.0083	10.8801	9.3835	10.4816	3.1965	3.86839	4.23065	5.07694	6.58455	7.67653	7.99943	9.01429	9.19574	10.0666	8.8668	9.78792	5.07357	6.23619	5.63295	6.96528	6.53838	7.87438	7.35568	8.60373	9.28073	9.95887	9.31702	10.1678	10.256	11.124	10.8842
2008-04-11	9.14199	9.35392	5.82687	6.02485	6.23919	6.45369	6.94229	7.18222	7.0215	7.23885	7.95883	8.24182	4.75908	4.96055	6.39681	6.6658	10.5491	10.6873	10.1313	10.4408	9.55111	9.96975	3.28907	3.522	4.36006	4.6829	6.75337	7.17431	8.14762	8.519	9.32795	9.65837	9.02202	9.40654	5.25534	5.88653	5.72314	6.70902	6.74899	7.47931	7.55295	8.24019	9.46449	9.89524	9.45055	10.1658	10.5138	11.0293	10.0771
2008-04-12	9.29658	9.15878	5.97848	5.83186	6.37802	6.28438	7.11237	6.96917	7.1708	7.05336	8.14897	8.00697	4.86386	4.84246	6.59811	6.54151	10.689	10.6437	10.2826	10.2545	9.71586	9.69567	3.40243	3.38066	4.47999	4.46691	6.90753	6.89181	8.30969	8.28423	9.4608	9.44368	9.12884	9.13004	5.30633	5.42895	5.80167	6.12696	6.80913	6.95167	7.61045	7.74583	9.43013	9.53404	9.55224	9.77062	10.4394	10.5551	9.9861
2008-04-13	9.213	9.81692	5.88527	6.615	6.33193	6.70079	7.0285	7.64181	7.10516	7.58478	8.07269	8.6274	4.97877	5.17252	6.77714	7.18413	10.7946	11.073	10.4537	10.7125	9.93214	10.1996	3.53431	3.76358	4.64677	4.86795	7.12279	7.39184	8.50927	8.7968	9.63227	9.84581	9.3111	9.47128	5.2908	5.90972	5.82582	6.36181	6.79016	7.49637	7.59281	8.24585	9.32216	9.67091	9.37088	9.69726	10.3094	10.7799	9.92925
2008-04-14	9.30651	10.0717	5.9983	6.80456	6.36612	6.98529	7.11742	7.93927	7.16917	7.86722	8.14128	9.00788	5.04794	5.25752	6.88969	7.19936	10.8626	11.0343	10.5553	10.8684	10.0579	10.4659	3.61413	3.85931	4.7446	5.06464	7.24824	7.66062	8.62723	9.00019	9.73201	10.0542	9.41425	9.77363	5.31935	5.76989	5.80577	6.44508	6.82316	7.34489	7.62362	8.11561	9.30994	9.75032	9.32934	9.94745	10.2992	10.852	9.93227
2008-04-15	9.65025	9.51494	6.3781	6.18378	6.61527	6.59497	7.47834	7.35846	7.46648	7.39269	8.5014	8.43694	5.25697	4.97516	7.28908	6.69523	11.1219	10.7084	10.8431	10.4617	10.3817	9.99159	3.86275	3.53754	5.00999	4.69846	7.57702	7.19429	8.95658	8.54089	9.98907	9.67608	9.6447	9.41932	5.43402	5.35339	5.96877	6.0171	6.95549	6.86178	7.74716	7.66211	9.43117	9.7113	9.44551	9.88026	10.4634	10.8058	10.0366
2008-04-16	10.0854	9.25904	6.87358	5.93993	6.95025	6.34826	7.9396	7.07217	7.84872	7.13664	8.96589	8.10649	5.52947	4.84329	7.74268	6.5356	11.3832	10.6365	11.2258	10.2568	10.8575	9.70344	4.19735	3.38253	5.40861	4.47374	8.07503	6.90096	9.41764	8.28932	10.3632	9.44949	10.0436	9.14228	5.88007	5.27246	6.43065	5.86	7.46608	6.76629	8.2199	7.5716	9.65104	9.67992	9.72059	9.84148	10.7453	10.7656	10.1965
2008-04-17	10.3401	9.55624	7.14244	6.27826	7.17066	6.5389	8.21674	7.37731	8.0873	7.38072	9.26489	8.39501	5.64618	5.03815	7.90101	6.92021	11.462	10.9006	11.4011	10.5306	11.0956	9.99876	4.3369	3.60192	5.59866	4.70008	8.31975	7.18596	9.632	8.58832	10.5503	9.6865	10.2647	9.33265	5.99558	5.59176	6.62193	6.15841	7.60362	7.13289	8.35223	7.91291	9.84805	9.94499	10.0056	10.0696	10.9883	11.1208	10.3261
2008-04-18	10.0995	9.63519	6.8276	6.33213	7.01499	6.64361	7.97125	7.47396	7.89697	7.47654	9.04737	8.52742	5.45769	5.12631	7.51437	7.00045	11.2151	10.9218	11.1606	10.6737	10.837	10.2151	4.09669	3.70565	5.36129	4.86734	8.0387	7.40709	9.34765	8.76908	10.3471	9.85606	10.0908	9.55579	5.84168	5.69153	6.3897	6.22521	7.42562	7.25139	8.18837	8.02579	9.94158	9.89516	10.1669	10.1959	11.0985	11.0235	10.3892
2008-04-19	10.0258	9.53275	6.78696	6.22765	6.91784	6.5573	7.88079	7.3629	7.80598	7.3809	8.92025	8.40738	5.40826	5.1171	7.51361	7.00007	11.2433	10.9278	11.0658	10.657	10.6732	10.1854	4.04392	3.69465	5.24451	4.84457	7.87659	7.37631	9.2256	8.74637	10.2185	9.83294	9.90423	9.52093	6.22299	5.58111	6.73783	6.27867	7.84859	7.12436	8.57856	7.90759	10.1519	9.76695	10.3841	9.96898	11.37	10.8731	10.5599
2008-04-20	10.4835	9.76502	7.35326	6.50741	7.26399	6.70168	8.36175	7.59957	8.19634	7.56669	9.38515	8.62301	5.78877	5.14542	8.23323	7.04948	11.6684	10.9587	11.5522	10.6975	11.2359	10.2337	4.54187	3.72777	5.77158	4.88296	8.50407	7.42488	9.82392	8.79317	10.657	9.8713	10.3379	9.55865	6.82085	5.79	7.35979	6.42675	8.52193	7.36183	9.19999	8.12607	10.4742	9.93646	10.7993	10.0944	11.7659	11.1039	10.8048
2008-04-21	11.0404	10.1068	8.0153	6.88568	7.7351	6.97644	8.96007	7.96536	8.69826	7.8742	9.99935	9.00116	6.19128	5.34884	8.86678	7.44691	11.9924	11.2155	12.0953	10.9716	11.9382	10.5383	5.06393	3.97492	6.40114	5.14075	9.27718	7.74007	10.5099	9.10983	11.203	10.1124	10.9656	9.77224	7.16129	5.90733	7.83991	6.69025	8.9062	7.49227	9.55709	8.25492	10.6783	9.9167	11.1307	10.1956	12.0039	11.056	10.8867
2008-04-22	10.9562	10.3976	7.82014	7.22332	7.69714	7.20858	8.88385	8.27526	8.65605	8.13199	9.97165	9.31504	6.25735	5.6724	8.90988	7.99934	12.0047	11.5318	12.2221	11.4147	12.1308	11.0838	5.12616	4.38125	6.52588	5.61278	9.45444	8.32235	10.6578	9.64944	11.3566	10.5399	11.1606	10.2262	6.90478	6.18397	7.65257	7.07167	8.6358	7.80507	9.31045	8.54155	10.5647	10.1376	11.0873	10.3321	11.8512	11.3579	10.7641
2008-04-23	10.7379	10.7503	7.59592	7.65107	7.50112	7.49408	8.64428	8.65081	8.44726	8.44267	9.70747	9.69094	6.17401	5.86481	8.77231	8.28504	11.9336	11.6796	12.1138	11.6906	11.9938	11.4477	5.01538	4.61927	6.39765	5.91691	9.29965	8.70593	10.5196	9.98987	11.2505	10.8249	11.0405	10.5552	6.64459	6.42397	7.35208	7.27222	8.3389	8.08192	9.03492	8.79736	10.5225	10.1927	10.9518	10.5497	11.8117	11.4019	10.7618
2008-04-24	10.945	10.6309	7.88573	7.43704	7.65787	7.43157	8.85956	8.53616	8.6171	8.36621	9.90362	9.61842	6.22435	5.94023	8.89136	8.40338	12.0007	11.742	12.157	11.7951	12.031	11.5826	5.09612	4.7149	6.46248	6.03389	9.36345	8.85115	10.5823	10.1198	11.2769	10.9302	11.0588	10.6749	6.76535	6.34961	7.58642	7.03505	8.46299	8.00358	9.15063	8.72605	10.6543	10.0205	11.0899	10.3499	11.9762	11.1827	10.8657
2008-04-25	11.4432	10.355	8.52294	7.13876	8.08271	7.19667	9.3916	8.23726	9.05794	8.11083	10.436	9.30035	6.40542	5.84852	9.20203	8.20566	12.1574	11.6232	12.376	11.6921	12.3029	11.4765	5.34803	4.58561	6.73976	5.91486	9.6886	8.71908	10.8707	9.98878	11.4851	10.849	11.2953	10.6055	7.11912	6.18278	7.9125	6.89661	8.86583	7.81509	9.5114	8.55042	10.9109	9.88951	11.396	10.1417	12.2867	11.0252	11.0874
2008-04-26	11.3086	10.2489	8.23358	7.02335	7.99549	7.10783	9.26288	8.12274	8.97485	8.01342	10.3628	9.17946	6.2825	5.76977	8.91144	8.10274	11.9989	11.5736	12.2787	11.5726	12.222	11.3122	5.14477	4.49185	6.57887	5.78453	9.53409	8.55055	10.7223	9.84233	11.4298	10.7199	11.2567	10.451	7.25641	6.00442	8.03668	6.93147	9.02489	7.61176	9.66134	8.36179	11.08	9.80484	11.6742	10.0226	12.4804	10.9202	11.1715
2008-04-27	10.0046	10.669	6.66346	7.58585	7.03531	7.41369	7.89738	8.55858	7.86598	8.35796	9.03988	9.57922	5.50827	6.00635	7.46824	8.57235	11.1362	11.843	11.2664	11.8503	11.045	11.6228	4.15376	4.82081	5.51373	6.11212	8.25075	8.92497	9.49489	10.198	10.5089	10.9584	10.3497	10.6839	5.91937	6.601	6.61159	7.23905	7.52477	8.272	8.28821	8.96537	10.2429	10.11	10.9575	10.2691	11.4034	11.3283	10.3986
2008-04-28	9.7711	10.6323	6.53871	7.43151	6.68352	7.43712	7.59903	8.53916	7.5572	8.37082	8.60213	9.62627	5.41232	5.85134	7.5913	8.15419	11.3105	11.5789	11.0469	11.7189	10.6109	11.5395	4.05866	4.5778	5.21425	5.94484	7.82299	8.77124	9.1988	10.0209	10.1692	10.8995	9.81112	10.6884	6.18274	6.47777	6.86126	7.23972	7.78631	8.1349	8.527	8.87223	10.0121	10.2293	10.2092	10.5834	11.1954	11.4496	10.4418
2008-04-29	10.4003	10.3253	7.24415	7.10528	7.20114	7.17272	8.27478	8.20557	8.12669	8.08426	9.30334	9.26778	5.73152	5.63668	8.07566	7.87181	11.5682	11.4416	11.5048	11.3931	11.2081	11.0927	4.45146	4.32269	5.71107	5.59102	8.44966	8.31362	9.75984	9.6224	10.6376	10.5482	10.3436	10.2695	6.59882	6.50684	7.40122	7.24394	8.26803	8.16042	8.98463	8.88475	10.2628	10.1505	10.54	10.4921	11.5049	11.3498	10.6141
2008-04-30	10.1327	10.8577	6.84738	7.83941	7.05937	7.56582	8.01215	8.75753	7.938	8.51884	9.10456	9.76934	5.48606	5.96434	7.52686	8.53019	11.2096	11.8258	11.2108	11.7796	10.9192	11.52	4.12873	4.77495	5.42229	6.0377	8.12149	8.82455	9.41202	10.1129	10.4116	10.877	10.1811	10.5828	5.91797	7.00257	6.84983	7.7523	7.49313	8.71421	8.28535	9.38927	10.022	10.2636	10.428	10.5559	11.1707	11.5036	10.3541
2008-05-01	10.1537	11.2387	6.95934	8.2063	6.99995	7.91881	8.01085	9.17988	7.90589	8.89295	9.03329	10.2489	5.48554	6.12527	7.68247	8.68983	11.353	11.8901	11.16	12.051	10.7685	11.9153	4.14476	4.9504	5.3374	6.32364	7.98343	9.2107	9.33722	10.4396	10.2932	11.1898	9.96124	10.9727	6.11259	7.15166	6.88057	7.85789	7.71692	8.88802	8.46044	9.55839	10.1119	10.633	10.3122	10.9821	11.3238	11.9611	10.5232
2008-05-02	10.8662	10.4831	7.83277	7.21186	7.57779	7.35725	8.7689	8.39242	8.53195	8.26495	9.78935	9.51418	5.90019	5.72445	8.40747	7.9194	11.7587	11.4378	11.7052	11.5504	11.4341	11.3424	4.68437	4.41689	5.94546	5.76968	8.71915	8.55877	10.0155	9.81768	10.8114	10.745	10.5146	10.5355	6.9521	6.61508	7.68666	7.37099	8.65751	8.29276	9.3287	9.01859	10.673	10.565	10.9715	11.1078	12.0169	11.8487	10.9397
2008-05-03	11.6168	9.95733	8.75713	6.69376	8.23453	6.87954	9.57641	7.8126	9.21036	7.75516	10.6188	8.86437	6.47528	5.39428	9.37813	7.43651	12.245	11.1793	12.4079	11.0623	12.314	10.6994	5.47918	4.0223	6.83115	5.25411	9.76329	7.89882	10.9385	9.22724	11.4862	10.2389	11.2867	9.95925	7.84964	6.19786	8.66414	6.86103	9.63174	7.80776	10.249	8.57812	11.2978	10.1493	11.8132	10.6002	12.7478	11.3292	11.3358
2008-05-04	12.1542	10.241	9.41007	7.05749	8.72327	7.07202	10.158	8.1046	9.70509	7.98491	11.2294	9.1306	6.73135	5.57404	9.69947	7.84494	12.3929	11.4487	12.7985	11.2763	12.8581	10.9057	5.78378	4.25855	7.26204	5.46159	10.3218	8.13337	11.4194	9.47925	11.9135	10.4004	11.8054	10.0695	8.05967	6.09385	8.99368	6.84662	9.89425	7.69376	10.5782	8.45664	11.5231	10.0924	12.276	10.3483	12.9939	11.2893	11.4135
2008-05-05	12.0808	10.6319	9.21609	7.502	8.66277	7.39904	10.0895	8.52534	9.66278	8.33986	11.1965	9.56771	6.59232	5.94912	9.43801	8.47114	12.2666	11.7889	12.6609	11.7791	12.699	11.536	5.57049	4.74296	7.05366	6.0268	10.0953	8.82412	11.2213	10.1064	11.7962	10.8914	11.6724	10.6109	8.1721	6.63615	9.0215	7.24093	10.2715	8.29729	11.0027	9.01082	11.3429	10.5375	12.1405	10.8117	12.7765	11.8521	11.2611
2008-05-06	11.855	10.8803	8.96308	7.79067	8.45775	7.60918	9.84308	8.79272	9.45035	8.5651	10.9307	9.8445	6.5156	6.07895	9.35239	8.62457	12.2282	11.8579	12.5351	11.9838	12.5198	11.8248	5.48481	4.89328	6.92135	6.24851	9.91868	9.11541	11.0698	10.3562	11.6546	11.1189	11.4992	10.8889	8.23153	7.03171	9.05911	7.73835	10.2712	8.7543	10.9976	9.42614	11.267	10.6723	11.9498	11.1846	12.6965	11.9882	11.2478
2008-05-07	11.9846	11.6922	9.17529	8.91246	8.56947	8.29784	9.97732	9.65128	9.55543	9.26394	11.0497	10.6728	6.61016	6.45163	9.5227	9.33611	12.3107	12.2252	12.6363	12.3832	12.6413	12.2842	5.62503	5.44374	7.06512	6.79485	10.0798	9.72284	11.2107	10.9036	11.7456	11.4639	11.6035	11.2606	8.18353	7.63708	8.91162	8.36858	10.2793	9.41035	11.0113	10.029	11.4426	10.9222	12.1123	11.382	12.9058	12.3034	11.3863
2008-05-08	11.7854	12.7818	8.83063	10.3023	8.40318	9.31774	9.77346	10.8252	9.39999	10.2619	10.8787	11.8998	6.43767	7.09647	9.16362	10.3372	12.1278	12.6624	12.4812	13.1218	12.4804	13.246	5.3506	6.36293	6.81952	7.82971	9.82541	10.9286	10.9812	11.9185	11.6299	12.1918	11.4854	12.1571	7.92803	8.7749	8.67226	9.49969	10.0338	10.6319	10.7896	11.1237	11.5434	11.472	12.308	12.0375	13.0169	12.9476	11.6003
2008-05-09	11.5683	13.4034	8.61279	11.0274	8.20374	9.91008	9.53384	11.5014	9.18935	10.8491	10.6104	12.636	6.34165	7.40797	9.07518	10.7419	12.0923	12.8405	12.3124	13.5625	12.2327	13.8555	5.25056	6.75324	6.64742	8.35044	9.589	11.586	10.7809	12.4768	11.4332	12.6664	11.2405	12.7404	8.1886	9.08071	8.69721	9.81838	10.761	10.9946	11.4666	11.4778	11.409	11.9323	12.2056	12.7039	12.8556	13.4626	11.657
2008-05-10	12.076	13.3336	9.3624	10.8385	8.65053	9.82826	10.0686	11.4364	9.62212	10.8024	11.1185	12.5918	6.70042	7.46192	9.72003	10.8147	12.4013	12.8712	12.6903	13.6325	12.6859	13.9514	5.78596	6.82441	7.19382	8.4399	10.1985	11.6957	11.3114	12.5686	11.7717	12.7403	11.6314	12.8326	8.62888	8.77858	9.24284	9.52014	11.0089	10.6846	11.6651	11.1917	11.5628	11.8629	12.2479	12.8203	13.045	13.3747	11.7684
2008-05-11	12.306	13.2524	9.53073	10.795	8.8645	9.75752	10.3289	11.3429	9.85998	10.7164	11.4322	12.477	6.8601	7.45501	9.8912	10.7997	12.481	12.867	12.9647	13.6354	13.0786	13.9576	5.95624	6.80843	7.47039	8.42997	10.5746	11.6898	11.6363	12.5661	12.0835	12.7467	12.0105	12.838	8.73579	9.13208	9.29787	9.79831	11.3682	11.0277	12.026	11.4969	11.7407	11.9855	12.541	12.7988	13.2433	13.5207	11.8004
2008-05-12	12.6299	13.2419	10.0543	10.7555	9.16784	9.74408	10.6669	11.3341	10.1323	10.7114	11.7481	12.4745	7.11962	7.51304	10.352	10.8949	12.6734	12.8998	13.1814	13.6727	13.3337	14.0022	6.37601	6.90668	7.87231	8.52155	10.9967	11.7823	11.981	12.6352	12.2635	12.7757	12.2409	12.8828	8.73464	9.37032	9.56094	10.1377	10.871	11.2889	11.5443	11.7577	11.7867	12.1044	12.6316	13.0352	13.2936	13.6497	12.0221
2008-05-13	13.2452	13.6767	10.8523	11.4413	9.76019	10.1926	11.3284	11.7879	10.6979	11.0922	12.445	12.93	7.4749	7.81148	10.8539	11.3242	12.8778	13.045	13.5994	13.9234	13.8979	14.3342	6.86989	7.36971	8.45546	9.00445	11.6889	12.3098	12.5518	13.0362	12.692	13.0119	12.7839	13.2195	9.26461	9.93826	10.1632	10.682	11.1482	11.851	11.628	12.2788	11.9456	12.079	12.7723	13.0303	13.4753	13.6206	12.2572
2008-05-14	13.9668	14.3387	11.822	12.2728	10.4861	10.8569	12.0973	12.4974	11.3608	11.7119	13.264	13.7054	7.89414	8.18424	11.4356	11.801	13.0788	13.2094	13.9872	14.3028	14.4207	14.8597	7.49813	7.89978	9.13835	9.61665	12.4553	13.0211	13.1426	13.5871	13.0724	13.4019	13.3107	13.751	9.72334	10.7569	10.6173	11.2201	11.6491	13.4245	12.0861	13.8841	12.2988	12.3473	13.1628	13.2232	13.8658	13.9184	11.9523
2008-05-15	14.1461	14.6222	11.9116	12.5694	10.6303	11.1262	12.3061	12.8083	11.5497	11.9864	13.5143	14.0552	7.89852	8.28876	11.4074	11.9286	13.1093	13.2764	14.1595	14.4945	14.6714	15.1282	7.41977	8.00937	9.16117	9.79598	12.5621	13.2677	13.2805	13.8091	13.2891	13.6166	13.5307	14.0028	9.57366	10.5284	10.5261	11.1053	11.5257	12.8464	11.9597	13.3558	12.4622	12.5216	13.4858	13.5558	14.0419	14.106	13.135
2008-05-16	13.7276	14.5283	11.3299	12.4118	10.208	11.0185	11.8617	12.7134	11.1688	11.9042	13.0469	13.9556	7.65014	8.25164	11.066	11.8822	12.977	13.2598	13.879	14.454	14.29	15.0716	7.07113	7.95822	8.75255	9.73477	12.0805	13.1951	12.8905	13.7521	13.0013	13.5741	13.1582	13.946	9.43982	10.4858	10.1491	11.0864	11.3835	12.6057	11.8193	13.122	12.4799	12.5873	13.5231	13.6374	14.0609	14.1768	13.21
2008-05-17	12.9661	14.1371	10.2875	11.8648	9.47429	10.6133	11.0483	12.3005	10.4808	11.547	12.2082	13.515	7.24833	8.04768	10.4397	11.6095	12.7279	13.1826	13.484	14.3141	13.7804	14.8822	6.46397	7.63456	8.10769	9.40592	11.3598	12.845	12.3068	13.5038	12.6265	13.4459	12.6719	13.7403	8.84521	10.3932	9.54328	11.064	10.7792	12.4358	11.2733	12.9464	12.2142	12.4714	13.3097	13.5782	13.7669	14.0511	13.1548
2008-05-18	13.173	13.4704	10.8041	10.9623	9.69697	9.95375	11.2462	11.5888	10.6233	10.9381	12.3468	12.7668	7.36434	7.55615	10.7129	10.8956	12.8158	12.9211	13.4408	13.8454	13.6776	14.2604	6.73296	6.89583	8.27006	8.60821	11.4535	11.9502	12.3518	12.7997	12.5202	12.991	12.5726	13.1266	9.24716	9.52691	9.96937	10.5448	11.1346	11.4927	11.6788	11.9464	12.2387	12.0453	13.1503	13.1351	13.7993	13.5763	13.2321
2008-05-19	13.2603	13.0772	10.7264	10.5329	9.75602	9.58516	11.3592	11.1579	10.7382	10.5618	12.5152	12.2916	7.33052	7.3343	10.582	10.6265	12.7863	12.7963	13.5544	13.4954	13.8651	13.7696	6.59562	6.6391	8.23611	8.23237	11.4961	11.4566	12.4176	12.3738	12.6868	12.6042	12.7498	12.6575	8.96787	9.23452	9.67675	10.1387	10.8821	11.1788	11.4668	11.7703	12.2717	11.8717	13.276	12.7501	13.8337	13.3892	13.225
2008-05-20	12.582	12.8562	9.80646	10.2286	9.11941	9.37449	10.6337	10.922	10.1285	10.3632	11.7746	12.0504	6.90868	7.22178	9.91623	10.4369	12.4925	12.7219	13.0745	13.4025	13.2445	13.6564	5.9912	6.45777	7.56204	8.05522	10.7139	11.2692	11.7568	12.2244	12.2176	12.5245	12.175	12.551	8.24771	8.99667	8.91665	9.97457	10.1015	10.9348	10.7509	11.5544	11.908	11.7275	12.9496	12.6215	13.4216	13.2223	12.9545
2008-05-21	12.3238	13.3684	9.58703	11.0714	8.87989	9.89204	10.3446	11.4543	9.86844	10.8016	11.4365	12.5658	6.85217	7.61367	9.91268	11.0738	12.4895	12.9396	12.9186	13.6537	13.0031	13.9591	5.96846	7.11893	7.44865	8.67354	10.527	11.8952	11.5938	12.6897	12.0205	12.7212	11.9338	12.8565	7.97551	9.42035	8.56086	10.23	9.78953	11.3159	10.4567	11.8429	11.6724	12.1134	12.5216	12.8522	13.1612	13.6649	12.8585
2008-05-22	12.5486	14.2424	9.90449	12.1743	9.08883	10.7662	10.5837	12.3915	10.0671	11.6183	11.6751	13.586	6.97028	8.23593	10.0823	11.8635	12.5654	13.2159	13.0729	14.3049	13.2106	14.8631	6.12522	7.99334	7.64187	9.69683	10.763	13.0935	11.7949	13.623	12.1805	13.3953	12.129	13.7679	8.21634	10.4653	8.77997	11.3395	10.0615	12.3841	10.6085	12.8306	11.7862	12.8847	12.5692	13.7478	13.2965	14.4845	12.9651
2008-05-23	13.2067	14.1233	10.8411	11.8144	9.72888	10.5926	11.2831	12.2893	10.6556	11.5395	12.3876	13.5095	7.43041	7.96812	10.8196	11.4743	12.8493	13.1541	13.4753	14.3252	13.7181	14.9089	6.84813	7.47022	8.37424	9.28478	11.5555	12.7516	12.4243	13.4577	12.5441	13.4827	12.6159	13.7528	9.22467	10.2163	9.78113	11.1463	11.1107	12.2087	11.6732	12.5917	12.3634	13.0947	13.1377	14.3154	13.9361	14.7133	13.3196
2008-05-24	13.5645	12.71	11.1892	9.84311	10.06	9.24305	11.6792	10.7846	11.0059	10.275	12.8361	11.9774	7.76617	7.12564	11.2491	10.203	13.0328	12.6245	13.9391	13.3911	14.3619	13.6802	7.2725	6.25847	8.93599	7.92309	12.2609	11.1736	13.0174	12.1524	13.0438	12.5583	13.2363	12.5878	9.52043	8.60331	10.144	9.43787	11.4398	10.5346	11.93	11.0731	12.6758	12.1806	13.7318	13.5521	14.2712	13.7157	13.387
2008-05-25	13.3536	12.2851	10.8652	9.58762	9.84762	8.84385	11.4578	10.2979	10.8206	9.82199	12.6142	11.3708	7.63503	7.02806	11.0387	10.206	12.9689	12.6144	13.8759	13.0921	14.2884	13.2197	7.04186	6.23668	8.72941	7.72604	12.0607	10.8341	12.8777	11.8486	13.0025	12.1798	13.1557	12.1331	9.28372	8.32605	9.93552	9.04932	11.2029	10.1759	11.7208	10.7208	12.602	11.7523	13.7306	12.5995	14.1925	13.2539	13.1704
2008-05-26	13.4087	12.9039	11.0296	10.4192	9.91445	9.43052	11.5076	10.9607	10.8548	10.3818	12.6436	12.0536	7.50683	7.41632	10.8745	10.7783	12.8966	12.8451	13.6922	13.5176	14.0334	13.7846	6.88284	6.79612	8.51456	8.35749	11.788	11.5656	12.6461	12.4476	12.8036	12.6039	12.9113	12.675	9.23255	8.95236	9.87512	9.6069	11.1355	10.8371	11.6516	11.3191	12.4111	11.9349	13.5026	12.7421	13.9853	13.4641	12.601
2008-05-27	13.6506	13.5628	11.3262	11.2727	10.1494	10.0744	11.769	11.6682	11.0812	10.9899	12.9261	12.8056	7.6557	7.72587	11.1056	11.2018	12.9736	13.0089	13.7951	13.8683	14.1627	14.2622	7.12839	7.22956	8.75198	8.86706	12.034	12.167	12.829	12.9344	12.8904	12.9644	13.0434	13.1418	9.58238	9.90197	10.1846	10.2762	11.4904	12.2254	11.9712	12.7779	12.2424	12.2147	13.2711	13.0983	13.8005	13.7734	12.6824
2008-05-28	14.2464	14.1068	12.1925	11.9604	10.7745	10.6164	12.3939	12.2521	11.6201	11.4977	13.5871	13.439	7.9677	8.06855	11.5268	11.6568	13.1187	13.1592	14.0939	14.1808	14.5697	14.6895	7.58796	7.73857	9.26201	9.42627	12.6133	12.7971	13.2764	13.413	13.1887	13.2748	13.4541	13.5791	10.1867	10.5159	10.805	10.9894	12.1081	12.7643	12.5385	13.2716	12.6019	12.4902	13.482	13.4483	14.1909	14.0724	12.1015
2008-05-29	14.4498	14.7688	12.3022	12.847	10.9362	11.3118	12.6308	12.9495	11.8323	12.111	13.8666	14.2056	7.99184	8.57251	11.5406	12.2516	13.1513	13.3299	14.2289	14.601	14.7631	15.2845	7.56834	8.47253	9.31168	10.2428	12.7227	13.7197	13.3989	14.0792	13.3524	13.7003	13.6263	14.2153	10.3023	11.3881	10.9743	11.9453	12.2582	13.5667	12.6801	14.0065	12.8373	13.16	13.9476	14.0665	14.4426	14.765	12.1731
2008-05-30	13.748	15.1026	11.2927	13.1693	10.2182	11.6201	11.8901	13.3195	11.1988	12.4383	13.0925	14.6248	7.47727	8.67769	10.7652	12.3992	12.8699	13.435	13.7775	14.895	14.1762	15.6906	6.77053	8.54908	8.4834	10.4343	11.8164	14.0184	12.6927	14.3853	12.931	14.0351	13.047	14.5768	9.74314	11.5639	10.4082	12.1505	11.7076	13.7668	12.2182	14.1991	12.6964	13.4545	13.8746	14.7119	14.2939	15.0798	12.4919
2008-05-31	13.6471	14.4976	11.3648	12.2597	10.1546	10.9572	11.7605	12.6946	11.0709	11.8929	12.908	13.9531	7.36493	8.53341	10.6942	12.2275	12.8164	13.3756	13.485	14.7393	13.7455	15.4713	6.78271	7.84815	8.34956	9.69178	11.5614	13.2056	12.4466	13.8067	12.5786	13.8706	12.6357	14.3542	9.69568	10.8725	10.2957	11.9776	11.6331	12.9822	12.1586	13.4636	12.7967	12.9252	13.8338	14.3474	14.3986	14.5396	13.5022
2008-06-01	13.2714	14.0423	10.6759	11.8068	9.76117	10.5333	11.3775	12.1916	10.761	11.4487	12.5532	13.3854	7.28044	8.24457	10.5136	11.8659	12.7563	13.2767	13.4869	14.5308	13.7728	15.1811	6.56405	7.67416	8.20126	9.39198	11.4561	12.7862	12.3845	13.4275	12.6153	13.6706	12.6619	14.0375	9.16833	10.3118	9.54684	10.9828	11.1061	12.338	11.6849	12.8473	12.1077	12.5184	13.403	13.6438	13.6364	14.102	12.9185
2008-06-02	12.7441	14.0001	10.0882	11.7504	9.26948	10.4907	10.8009	12.1466	10.2599	11.4097	11.9229	13.3372	7.11215	8.05503	10.2816	11.6291	12.6539	13.1758	13.261	14.2663	13.4653	14.8122	6.31157	7.67262	7.8752	9.41293	11.0498	12.8269	12.0388	13.4713	12.3773	13.3839	12.3699	13.6809	8.5709	10.266	9.14664	10.802	10.4546	12.6544	11.0863	13.1783	11.7732	12.5678	12.6096	13.5778	13.2786	14.1557	12.9123
2008-06-03	12.9007	13.829	10.3766	11.4991	9.42337	10.3144	10.961	11.9666	10.3861	11.2561	12.0646	13.1501	7.22696	7.78617	10.4893	11.2447	12.7349	13.0525	13.3384	14.0601	13.5517	14.5399	6.50755	7.24735	8.05233	8.97911	11.2266	12.3612	12.1774	13.1256	12.4339	13.1944	12.4492	13.3989	8.67105	9.77806	9.23366	10.2812	10.5386	12.1685	11.1493	12.74	11.8658	12.49	12.7014	13.5998	13.3845	14.0712	13.0062
2008-06-04	13.9669	13.4282	11.9138	10.9433	10.5135	9.91727	12.0854	11.5398	11.3473	10.8926	13.2384	12.7056	7.9976	7.37637	11.5714	10.6465	13.0857	12.8141	13.9498	13.6131	14.3661	13.9445	7.70779	6.657	9.29536	8.31153	12.5755	11.5878	13.1821	12.4948	13.006	12.7478	13.2902	12.8252	10.1429	8.98074	10.7188	9.47612	12.0191	11.3291	12.4814	11.9773	12.5539	11.8561	13.3061	12.982	14.1382	13.3558	13.4766
2008-06-05	14.7546	13.5105	12.7666	11.1818	11.2727	10.0182	12.9447	11.6147	12.1063	10.9454	14.2037	12.7532	8.48294	7.44688	12.1643	10.82	13.3412	12.8619	14.6425	13.5547	15.3361	13.8352	8.30143	6.83775	10.11	8.40796	13.6145	11.6263	14.0555	12.4976	13.7621	12.6425	14.2285	12.724	10.985	9.40599	11.6656	9.71962	12.9469	11.8482	13.3607	12.4289	12.9971	11.8241	14.0956	12.5827	14.6086	13.3409	13.6438
2008-06-06	15.2069	13.9842	13.3683	11.8005	11.76	10.4919	13.4164	12.1213	12.5273	11.3838	14.7346	13.2971	8.67974	7.81561	12.3851	11.3279	13.3942	13.0486	14.7777	13.937	15.5312	14.3536	8.59481	7.37097	10.4252	9.0121	13.9614	12.3231	14.2913	13.0497	13.8956	13.0281	14.4489	13.2371	11.3628	9.72533	11.9734	10.1766	13.326	11.9134	13.7119	12.4965	13.2598	12.2333	14.386	13.0696	14.8773	13.7946	13.7816
2008-06-07	15.4319	13.89	13.5748	11.5467	11.9626	10.3686	13.6681	12.0354	12.7494	11.3178	15.0193	13.2305	8.86386	7.69231	12.5934	11.1091	13.4643	13.0013	14.9724	13.9648	15.8085	14.4127	8.84045	7.10905	10.726	8.82622	14.3219	12.187	14.5663	12.9865	14.1031	13.1002	14.7335	13.2744	11.5779	9.63355	12.1985	10.2346	13.7317	11.6825	14.1618	12.2708	13.4475	12.321	14.6623	13.3471	15.0702	13.8875	13.8603
2008-06-08	14.9099	13.2622	12.8119	10.6976	11.3806	9.75502	13.1321	11.3643	12.2737	10.746	14.4261	12.5296	8.37702	7.2469	12.024	10.4454	13.3582	12.7295	14.7686	13.4722	15.5152	13.7613	8.04893	6.46832	9.95744	8.10338	13.5388	11.3488	14.085	12.2964	13.9372	12.6104	14.3524	12.653	10.9568	9.38444	11.5513	9.98751	13.5915	11.853	14.0455	12.4499	13.0536	12.1542	14.4599	13.1756	14.6754	13.7024	13.6009
2008-06-09	14.2524	13.7862	12.0188	11.6592	10.7296	10.3225	12.4234	11.8957	11.6532	11.182	13.6464	13.0338	7.98377	7.71983	11.5341	11.2238	13.1438	12.9761	14.1992	13.6975	14.7206	14.0147	7.56751	7.30285	9.29645	8.84199	12.6948	12.0599	13.3701	12.7964	13.3169	12.7507	13.5877	12.9254	10.4636	10.0336	10.8373	10.5499	13.3084	12.429	13.8693	12.9564	12.6552	12.3516	13.8344	13.239	14.2497	13.923	13.4219
2008-06-10	14.2708	14.9152	12.157	13.0548	10.7787	11.4758	12.4289	13.0995	11.6527	12.2455	13.6339	14.3747	8.16207	8.46791	11.7735	12.1345	13.2011	13.2965	14.284	14.5107	14.8336	15.1551	7.86693	8.32472	9.58058	10.0737	12.9806	13.5255	13.5575	13.9393	13.3831	13.6069	13.7234	14.0766	10.77	10.6789	11.1069	11.1776	13.5786	13.063	14.1033	13.5454	12.7137	12.8854	13.7464	13.8252	14.3112	14.488	13.4982
2008-06-11	14.9986	15.154	13.158	13.1933	11.5633	11.6572	13.1873	13.3807	12.3242	12.4922	14.4748	14.6952	8.66229	8.55231	12.3482	12.2516	13.3546	13.3916	14.6704	14.7859	15.3853	15.5362	8.60067	8.36845	10.3865	10.2307	13.8826	13.7863	14.1923	14.216	13.7714	13.9237	14.3267	14.4131	11.7236	11.0779	12.0865	11.4933	14.5188	13.9326	14.9643	14.4772	13.1499	13.1771	14.1653	14.337	14.7608	14.7953	13.7464
2008-06-12	15.4713	15.1451	13.6379	13.2513	12.0111	11.6767	13.7065	13.3592	12.7847	12.4744	15.0638	14.6689	8.85659	8.59459	12.597	12.291	13.4833	13.3704	15.0225	14.714	15.8752	15.4392	8.81217	8.47088	10.7208	10.2885	14.3367	13.8083	14.603	14.1853	14.1628	13.8312	14.7839	14.3468	11.8596	11.4707	12.3366	11.8096	14.7192	14.2947	15.1502	14.805	13.3802	13.3075	14.6032	14.5011	15.0035	14.9289	13.8179
2008-06-13	15.5209	15.8927	13.692	14.2484	12.06	12.5262	13.7601	14.115	12.8325	13.1719	15.1249	15.5652	8.8797	9.17674	12.6132	12.841	13.4739	13.4612	14.9987	15.0241	15.8452	15.9163	8.85848	9.31428	10.753	11.1919	14.3578	14.7983	14.5978	14.7948	14.1323	14.1383	14.7682	14.9396	11.8555	12.2999	12.314	12.7127	14.6962	15.0995	15.1256	15.5466	13.5356	13.6794	14.7475	14.803	15.1572	15.2906	13.9009
2008-06-14	15.573	16.7283	13.7614	15.1447	12.1178	13.3847	13.8135	14.994	12.881	13.9802	15.1866	16.6181	8.89899	9.7879	12.6407	13.4157	13.4915	13.6322	15.0463	15.5887	15.9107	16.7501	8.87555	10.0804	10.7876	12.1479	14.4091	15.957	14.649	15.6191	14.1858	14.7515	14.827	15.8363	11.9685	13.2408	12.4628	13.5099	14.8133	15.9069	15.2416	16.4606	13.6526	14.1812	14.9259	15.3607	15.2765	15.7701	13.9368
2008-06-15	15.9495	16.8104	14.268	15.1702	12.5518	13.4028	14.1913	15.1172	13.232	14.0672	15.639	16.7162	9.15707	9.81133	12.8663	13.5617	13.5073	13.7577	15.1253	15.8697	16.0453	17.1141	9.26469	10.0812	11.1803	12.2392	14.8195	16.1299	14.8702	15.8795	14.2547	15.065	15.0302	16.1199	12.219	13.2967	12.7906	13.7285	15.035	16.0225	15.4286	16.5636	13.767	14.2423	15.0401	15.7042	15.3878	15.8585	14.0029
2008-06-16	16.7244	16.8096	15.1582	15.2211	13.4056	13.4569	14.9747	15.0859	13.9742	14.0602	16.6178	16.7196	9.71172	9.7571	13.3263	13.4505	13.593	13.6828	15.4787	15.6883	16.5951	16.8714	9.99038	10.0302	12.021	12.128	15.7931	15.9622	15.4817	15.6912	14.6305	14.8632	15.686	15.9133	12.9608	13.4039	13.6149	13.8037	15.6577	16.0947	15.9773	16.6317	14.1924	14.2772	15.3462	15.614	15.7774	15.8772	14.2053
2008-06-17	17.3974	17.0746	15.8389	15.495	14.0913	13.7256	15.6777	15.3652	14.6302	14.3178	17.4832	17.0565	10.187	9.92184	13.7358	13.5718	13.7116	13.7003	15.8977	15.7802	17.2234	17.0199	10.5596	10.2387	12.7441	12.3706	16.6808	16.2443	16.0964	15.8588	15.0903	14.962	16.3728	16.0986	13.6273	13.6128	14.3048	14.1041	16.2846	16.2955	16.5625	16.8226	14.6135	14.4183	15.8976	15.7727	16.177	16.0093	14.349
2008-06-18	17.3764	17.0285	15.7827	15.4222	13.9977	13.6461	15.7038	15.336	14.6141	14.276	17.4338	16.9926	10.0467	9.90292	13.7985	13.621	13.839	13.7569	16.1215	15.8964	17.4794	17.1647	10.3717	10.2033	12.6142	12.3707	16.5932	16.275	16.227	15.9522	15.3397	15.092	16.4986	16.1984	13.4344	13.2491	14.1843	13.8332	15.9266	16.0932	16.211	16.47	14.7846	14.3954	16.1959	15.8501	16.3478	16.0002	14.4032
2008-06-19	16.7711	16.7961	15.1048	15.1686	13.3428	13.4012	15.0859	15.0953	14.032	14.0518	16.6673	16.6986	9.6056	9.69348	13.3856	13.4476	13.7236	13.7228	15.7354	15.7576	16.9069	16.9496	9.80867	9.93218	11.9247	12.0532	15.7669	15.9047	15.6487	15.7172	14.9228	14.9435	15.8749	15.9445	13.1073	13.1278	13.6353	13.7493	15.8635	15.9662	16.1608	16.3558	14.3953	14.2546	16.0693	15.7106	16.0246	15.8694	14.2226
2008-06-20	16.633	16.7655	15.0254	15.1581	13.2654	13.3925	14.9063	15.0505	13.8901	14.0194	16.4948	16.6614	9.5647	9.69015	13.2735	13.3878	13.6335	13.6641	15.5206	15.6263	16.6221	16.7799	9.78697	9.94654	11.8287	12.0234	15.6023	15.8353	15.4404	15.6009	14.6817	14.7959	15.641	15.8148	13.2659	13.2865	13.6803	13.8741	16.0599	16.0933	16.4019	16.4966	14.2777	14.3162	15.6061	15.6446	15.8767	15.9123	14.2199
2008-06-21	17.0398	17.2391	15.4721	15.6867	13.7111	13.9499	15.3155	15.4987	14.2823	14.4749	17.0171	17.2867	9.8725	10.1615	13.4974	13.6421	13.66	13.647	15.6771	15.7529	16.8791	17.0355	10.1826	10.5279	12.2809	12.6709	16.1222	16.5703	15.7414	15.951	14.8483	14.9313	15.9711	16.2223	13.7281	13.6607	14.1829	14.3006	16.4909	16.3802	16.9096	16.6866	14.4632	14.6545	15.7982	15.9048	16.0479	16.2089	14.2925
2008-06-22	17.3345	17.7375	15.766	16.1728	14	14.4329	15.6312	16.0339	14.5701	14.9628	17.3918	17.9232	10.1627	10.4898	13.7503	14.0183	13.7345	13.8111	15.9373	16.2177	17.2681	17.6921	10.5306	10.9115	12.7239	13.2126	16.6666	17.2714	16.1208	16.5332	15.1338	15.4431	16.3944	16.8621	13.9601	13.9772	14.3458	14.5867	16.7103	16.7152	17.1349	17.0001	14.6353	14.8619	15.9998	16.2737	16.2076	16.4165	14.3551
2008-06-23	17.3559	17.5731	15.7813	15.9899	14.0088	14.2062	15.6622	15.905	14.5918	14.8048	17.4154	17.6869	10.1288	10.2657	13.8133	13.9608	13.8057	13.8648	16.0767	16.2501	17.4379	17.6855	10.4832	10.6461	12.7147	12.9368	16.6887	16.9711	16.2299	16.4549	15.2882	15.4787	16.5047	16.7518	14.1783	13.7657	14.5145	14.3271	16.8555	16.5757	17.3417	16.8722	14.7868	14.7136	16.1669	16.2746	16.3452	16.3046	14.4087
2008-06-24	17.2238	16.7402	15.6369	15.0311	13.8596	13.2809	15.5329	15.0682	14.4643	14.0072	17.2429	16.6316	9.96067	9.64044	13.6605	13.4619	13.7599	13.7826	15.9216	15.8807	17.2077	17.1016	10.2776	9.83049	12.4545	11.9982	16.3704	15.8885	16.0049	15.7928	15.1187	15.0864	16.2565	16.0385	14.2058	12.941	14.6423	13.3849	16.8226	15.8428	17.3595	16.205	14.7604	14.3516	16.2579	15.92	16.3382	15.9723	14.3892
2008-06-25	17.0749	15.9866	15.4813	14.2079	13.7062	12.5251	15.3773	14.2608	14.3197	13.2806	17.0531	15.6979	9.76845	9.18729	13.5151	12.9602	13.7397	13.599	15.817	15.352	17.0389	16.3477	10.0289	9.25565	12.1693	11.2573	16.0421	14.9747	15.8101	15.0791	15.0074	14.5133	16.0444	15.2765	13.9032	12.2095	14.3374	12.6806	16.6149	14.9997	17.1164	15.3596	14.7854	14.0554	16.1822	15.5145	16.3464	15.6814	14.4066
2008-06-26	16.4347	16.1355	14.669	14.4843	12.9552	12.7513	14.7501	14.3837	13.7162	13.4097	16.2562	15.8699	9.28043	9.28858	13.0889	13.0043	13.6732	13.5537	15.5508	15.2648	16.6219	16.2464	9.34956	9.43259	11.4217	11.3923	15.207	15.0779	15.3012	15.0648	14.7352	14.4056	15.5261	15.2383	13.382	12.5863	13.7795	12.8427	16.0091	15.3887	16.6302	15.8883	14.4991	14.0156	16.1303	15.3526	16.1167	15.6318	14.2719
2008-06-27	15.3468	16.4729	13.3502	14.8266	11.8241	13.076	13.5992	14.751	12.6853	13.7403	14.9445	16.2928	8.54357	9.42999	12.2406	13.1744	13.4251	13.6294	14.9083	15.4745	15.7072	16.5408	8.29999	9.60039	10.2283	11.6298	13.8398	15.3852	14.3077	15.3252	14.0743	14.6361	14.5533	15.5221	12.3384	12.9768	12.7879	13.2781	14.9685	15.7491	15.6688	16.2373	13.7373	14.1373	15.3827	15.4548	15.3852	15.7446	13.9201
2008-06-28	14.7847	16.6183	12.7397	14.9989	11.2808	13.2393	12.9865	14.8969	12.1439	14.2374	14.2559	16.4756	8.3467	9.60061	12.0002	13.2923	13.2843	13.628	14.496	15.5191	15.1303	16.6264	8.11532	9.83732	9.88586	11.8784	13.3481	15.6534	13.8488	15.4586	13.6078	14.6786	14.0198	15.6598	11.6607	13.3218	12.031	13.6953	14.3875	16.0781	15.06	16.5598	13.1701	14.3518	14.518	15.6548	14.7953	15.942	13.6794
2008-06-29	15.3501	16.8299	13.6056	15.2345	11.9448	13.468	13.5519	15.1127	12.6548	14.0808	14.8968	16.7439	8.85165	9.84043	12.5387	13.5038	13.3962	13.6836	14.7986	15.7169	15.5759	16.9236	8.87076	10.1382	10.6856	12.2472	14.2181	16.0962	14.4143	15.7604	13.9022	14.8931	14.5464	15.9897	12.0822	13.6091	12.4438	14.0139	14.8499	16.3518	15.3919	16.8158	13.392	14.4772	14.4591	15.8703	15.0056	16.068	13.8535
2008-06-30	16.3226	16.6723	14.7151	15.0039	12.9685	13.2473	14.5679	14.9787	13.5871	13.9359	16.1046	16.5437	9.49579	9.71638	13.1537	13.4863	13.5589	13.747	15.3348	15.8184	16.3709	17.032	9.71725	9.95484	11.6969	12.0965	15.4114	15.9676	15.2405	15.7826	14.4752	15.0112	15.4213	16.0169	12.9096	13.3712	13.4188	13.8041	15.68	16.1808	16.072	16.6616	13.9502	14.3007	15.0767	15.8222	15.5488	15.9196	14.1067
2008-07-01	16.7223	16.326	15.0997	14.6343	13.3354	12.9011	15.012	14.6078	13.979	13.6343	16.606	16.1114	9.72743	9.51495	13.448	13.2654	13.6996	13.6623	15.7159	15.5718	16.9016	16.6803	9.9861	9.70675	12.0927	11.7676	15.9331	15.5556	15.6995	15.4568	14.8952	14.7419	15.9229	15.664	13.4048	13.2909	13.9983	13.6366	16.2099	15.9196	16.5872	16.5221	14.3879	14.1211	15.6445	15.5413	15.9693	15.74	14.2701
2008-07-02	16.9849	16.617	15.4167	15.0307	13.6564	13.2742	15.2572	14.8752	14.2288	13.8889	16.9472	16.4772	9.88959	9.72347	13.528	13.3743	13.6783	13.6306	15.722	15.5638	16.9396	16.7059	10.2015	9.99835	12.3141	12.0558	16.1691	15.8522	15.7903	15.5634	14.8979	14.725	16.024	15.7741	14.1038	13.6755	14.6024	13.8535	16.6973	16.2227	17.2281	16.808	14.6265	14.3133	15.9859	15.57	16.1989	15.901	14.3502
2008-07-03	17.4473	17.2371	15.8883	15.6791	14.1419	13.9283	15.7296	15.5107	14.6789	14.4755	17.5477	17.276	10.103	10.1074	13.7198	13.6789	13.7371	13.7004	15.9215	15.8453	17.2357	17.1403	10.4587	10.4659	12.6429	12.6288	16.5738	16.5415	16.0772	16.0102	15.1166	15.0326	16.3426	16.274	14.4936	14.0845	15.0684	14.2314	17.0449	16.64	17.5774	17.2015	14.8537	14.5633	16.1873	15.9063	16.3976	16.1397	14.4321
2008-07-04	17.4091	17.5479	15.8175	15.9827	14.0325	14.2231	15.7373	15.8496	14.6458	14.7802	17.4758	17.6689	10.0293	10.2571	13.7367	13.8686	13.7911	13.7898	16.0118	16.088	17.3359	17.4783	10.3595	10.6414	12.5669	12.8846	16.5137	16.877	16.1207	16.3039	15.2177	15.2996	16.3833	16.5942	14.3828	14.3194	14.9435	14.5594	16.8878	16.8456	17.4745	17.4086	14.7122	14.7219	16.3114	16.102	16.3083	16.2874	14.36
2008-07-05	17.066	17.7875	15.4695	16.2199	13.694	14.508	15.3699	16.0652	14.3114	15.0117	17.0414	18.0035	9.8559	10.4443	13.5727	13.9166	13.7395	13.7499	15.8435	16.0728	17.0884	17.5003	10.1458	10.8545	12.2954	13.1131	16.1812	17.1324	15.8805	16.3778	15.0341	15.2844	16.1201	16.6994	14.0352	14.6764	14.5451	15.0254	16.5258	17.0644	17.1316	17.6513	14.5082	14.8346	15.9752	16.2391	16.1055	16.3912	14.2948
2008-07-06	17.1351	18.1783	15.5644	16.5842	13.7992	14.9101	15.421	16.4594	14.3757	15.3959	17.1367	18.5266	9.94316	10.6568	13.581	14.11	13.6971	13.8186	15.7806	16.2956	17.0246	17.8277	10.2659	11.0963	12.3989	13.438	16.275	17.5448	15.87	16.6812	14.9621	15.5308	16.1119	17.0421	14.1741	14.9579	14.6538	15.3363	16.6156	17.3135	17.2169	17.8946	14.6542	15.0403	15.9658	16.3766	16.2172	16.5613	14.3633
2008-07-07	17.5752	18.1831	16.0157	16.6047	14.2942	14.8611	15.8447	16.5143	14.8035	15.3993	17.726	18.4918	10.294	10.5081	13.7934	14.1264	13.7128	13.8899	15.9394	16.3894	17.2992	17.9122	10.6828	10.9363	12.8893	13.285	16.8528	17.3858	16.1851	16.7003	15.1367	15.6315	16.4796	17.0329	14.6995	14.9487	15.1931	15.3239	17.0667	17.3678	17.6526	17.9376	15.0767	15.0822	16.3032	16.5861	16.5747	16.6243	14.5104
2008-07-08	17.9663	17.7994	16.3932	16.2284	14.6729	14.4631	16.2636	16.123	15.1869	15.0241	18.2277	17.9877	10.5303	10.377	14.0367	13.942	13.8096	13.7969	16.2296	16.1462	17.7161	17.5774	10.9567	10.782	13.2656	13.0522	17.3343	17.0761	16.5628	16.4147	15.4567	15.3639	16.8992	16.7239	15.0545	14.7388	15.4451	14.9838	17.4663	17.2104	18.0245	17.777	15.4207	15.0388	16.7651	16.5054	16.8881	16.5805	14.6106
2008-07-09	17.9607	17.6671	16.3893	16.1027	14.6449	14.3524	16.2766	15.9677	15.1814	14.8941	18.2064	17.8269	10.5436	10.4625	14.0767	13.9834	13.8355	13.7947	16.2885	16.1732	17.7931	17.6302	10.9742	10.8793	13.2999	13.1658	17.3837	17.2101	16.6237	16.4794	15.5212	15.3942	16.9622	16.8035	15.1242	14.8149	15.4676	15.2003	17.5522	17.1783	18.1086	17.7665	15.3238	15.1262	16.9444	16.5206	16.8529	16.6451	14.5669
2008-07-10	17.9502	17.5919	16.3772	16.0194	14.6605	14.2471	16.2436	15.9102	15.1711	14.8218	18.2091	17.7179	10.6208	10.4028	14.0726	14.0126	13.8034	13.8459	16.2504	16.2564	17.7629	17.7205	11.0549	10.8055	13.3806	13.1076	17.471	17.1603	16.6228	16.5251	15.481	15.485	16.9772	16.8388	15.2825	14.7441	15.7172	15.2131	17.6782	17.1374	18.2254	17.7261	15.2982	15.1444	16.6928	16.636	16.793	16.6766	14.5626
2008-07-11	18.2241	17.3034	16.6218	15.7154	14.9634	13.9352	16.4986	15.6199	15.4414	14.5422	18.5947	17.3432	10.7832	10.1785	14.1757	13.8485	13.8239	13.8154	16.3543	16.1116	17.9306	17.4904	11.2312	10.533	13.6052	12.7771	17.7503	16.7647	16.7913	16.282	15.5975	15.3263	17.1788	16.5626	15.4219	14.5901	15.9108	14.9265	17.8395	16.9858	18.3839	17.5817	15.4179	14.9132	16.838	16.5145	16.8993	16.4895	14.6093
2008-07-12	18.2673	17.3131	16.6853	15.7512	14.948	13.9944	16.5998	15.5977	15.4818	14.5488	18.6032	17.3698	10.7105	10.2003	14.2421	13.7751	13.8992	13.738	16.4836	15.9581	18.0752	17.3024	11.1667	10.5752	13.5623	12.7775	17.7184	16.7305	16.8812	16.158	15.7365	15.1567	17.2495	16.4374	15.2185	14.652	15.6408	14.9618	17.6622	17.0159	18.2121	17.6119	15.2508	14.8194	16.876	16.2476	16.7904	16.3812	14.5459
2008-07-13	18.1529	17.6775	16.5612	16.115	14.8838	14.3864	16.4342	15.9602	15.3708	15.1915	18.4921	17.853	10.6169	10.4623	14.1044	13.9412	13.8289	13.762	16.3021	16.1048	17.8267	17.5444	11.0546	10.8757	13.3927	13.1446	17.4929	17.174	16.6696	16.4157	15.5371	15.3195	17.022	16.7404	15.1947	14.8671	15.6605	15.3091	17.589	17.2077	18.1478	17.797	15.2028	14.9134	16.6097	16.3113	16.7133	16.4599	14.5408
2008-07-14	18.4641	18.0158	16.8357	16.4369	15.2076	14.7364	16.7388	16.3023	15.6784	15.2358	18.921	18.3026	10.7915	10.7513	14.144	14.1178	13.7984	13.7924	16.3045	16.2767	17.8705	17.8263	11.2333	11.1904	13.5969	13.5413	17.7346	17.6647	16.7473	16.704	15.5438	15.5126	17.1389	17.087	15.4232	15.0922	15.9546	15.6337	17.7742	17.4155	18.3331	17.9979	15.392	15.0817	16.7484	16.4528	16.8661	16.6028	14.604
2008-07-15	18.6796	18.3765	17.0353	16.7485	15.4153	15.1286	16.9667	16.639	15.8904	15.5927	19.2023	18.8136	10.9934	10.965	14.3022	14.2823	13.8489	13.8433	16.4856	16.4633	18.1444	18.1097	11.4515	11.4215	13.8895	13.8497	18.1077	18.057	17.004	16.971	15.7459	15.7208	17.4377	17.3985	15.6994	15.4099	16.2636	15.9825	18.0139	17.6813	18.5719	18.2603	15.6444	15.3649	16.9728	16.668	17.0722	16.8336	14.677
2008-07-16	18.7175	18.786	17.0754	17.1016	15.4474	15.5398	17.0126	17.0477	15.9272	15.9984	19.2459	19.376	11.0183	11.2007	14.3788	14.3528	13.8953	13.8268	16.5915	16.518	18.2821	18.2358	11.4907	11.6412	13.9568	14.1239	18.1997	18.4026	17.116	17.1163	15.861	15.7889	17.5505	17.6061	15.7698	15.7645	16.3211	16.2761	18.1192	18.0115	18.6691	18.5839	15.7785	15.6842	17.2188	16.9882	17.2047	17.1004	14.7119
2008-07-17	18.5785	19.0567	16.9699	17.3269	15.2838	15.8084	16.899	17.316	15.7883	16.2883	19.0322	19.752	11.2103	11.4838	14.3397	14.5047	13.8799	13.8615	16.5443	16.6917	18.2136	18.5194	11.4457	11.9015	13.8944	14.4744	18.1192	18.8586	17.0542	17.3873	15.8087	15.9878	17.4808	17.9467	15.5992	16.0421	16.0602	16.6009	17.9738	18.275	18.5254	18.843	15.7584	15.9346	17.2575	17.2753	17.1993	17.3128	14.7059
2008-07-18	18.3688	19.2297	16.7707	17.4713	15.0827	15.9775	16.674	17.4896	15.5823	16.6273	18.7623	19.991	11.5665	11.6134	14.3218	14.641	13.9085	13.9177	16.5556	16.8611	18.1975	18.7644	11.3201	12.0531	13.7522	14.6891	17.9508	19.1393	17.0109	17.6055	15.8175	16.1759	17.4069	18.1942	15.4592	16.2911	15.9161	16.8094	17.8267	18.4726	18.3845	19.0468	15.6627	16.2114	17.1904	17.4582	17.1249	17.5153	14.6789
2008-07-19	18.4172	19.2814	16.8015	17.5386	15.1516	16.0188	16.7016	17.5602	15.6314	16.5807	18.8474	20.0397	10.8313	11.5675	14.2074	14.687	13.8313	13.9576	16.3879	16.9277	17.9838	18.8349	11.2827	12.035	13.672	14.6747	17.8342	19.1196	16.8436	17.6557	15.6352	16.2447	17.2412	18.2233	15.5574	16.4155	16.0111	16.9824	17.875	18.6388	18.4386	19.2003	15.6168	16.344	17.0853	17.7787	17.0755	17.6616	14.6673
2008-07-20	18.6491	19.1343	16.9928	17.4438	15.3975	15.8592	16.9191	17.4378	15.862	16.4825	19.1788	19.8083	11.0413	11.3908	14.2872	14.6285	13.8247	13.9624	16.4536	16.8717	18.1164	18.7211	11.49	11.8765	13.9293	14.4699	18.1544	18.8555	16.9922	17.535	15.7132	16.1766	17.4408	18.0536	15.7559	16.2805	16.1728	16.9119	18.0484	18.5366	18.6114	19.0935	15.7347	16.3095	17.0976	17.7703	17.1535	17.6398	14.7018
2008-07-21	18.9553	18.979	17.2282	17.2833	15.7149	15.7213	17.2033	17.2567	16.1679	18.2015	19.6252	19.6235	11.3237	11.3034	14.415	14.5008	13.8378	13.8995	16.5868	16.7078	18.3518	18.4964	11.758	11.7681	14.2792	14.3103	18.6036	18.6466	17.2296	17.3413	15.8683	15.997	17.7512	17.8467	15.9265	16.1857	16.3762	16.8203	18.1941	18.4218	18.7576	18.9854	15.8998	16.2457	17.2796	17.7248	17.2924	17.5927	14.7451
2008-07-22	19.3688	18.9546	17.4771	17.2873	16.1361	15.6812	17.5561	17.2559	16.5885	20.0404	20.2796	19.5638	11.7929	11.2497	14.4796	14.5247	13.7883	13.9298	16.6433	16.7507	18.5352	18.5363	12.0912	11.7298	14.7194	14.2712	19.1966	18.5994	17.4345	17.3626	15.953	16.0409	18.1005	17.8494	16.2875	16.1014	16.747	16.6803	18.4388	18.3727	19.0212	18.931	16.1288	16.1933	17.4074	17.6553	17.4564	17.547	14.8006
2008-07-23	19.8586	18.7519	17.8875	17.1188	16.5957	15.4693	18.0598	17.063	17.0756	19.8497	20.9489	19.2768	12.3725	11.0953	14.7853	14.4556	13.9052	13.9262	17.0288	16.6848	19.1119	18.4167	12.4695	11.5772	15.2597	14.0772	19.9179	18.3551	17.9491	17.2371	16.3866	15.9643	18.712	17.6864	16.6823	15.8795	17.0574	16.2441	18.8239	18.2015	19.402	18.7555	16.4297	16.136	17.6519	17.6224	17.6819	17.506	14.8671
2008-07-24	19.8009	18.5505	18.0506	16.9376	16.4957	15.2659	18.1425	16.8594	16.9964	18.9889	20.6837	19.005	13.9899	11.0291	15.07	14.3551	14.1241	13.8753	17.407	16.5541	19.5168	18.2381	12.4327	11.4954	15.2414	13.9548	19.8595	18.1937	18.2584	17.0844	16.7744	15.821	18.8946	17.5236	16.591	15.842	17.1015	16.19	18.8608	18.1312	19.4074	18.6925	16.4333	16.0633	18.0004	17.5545	17.7614	17.4481	14.8762
2008-07-25	18.9587	18.4474	17.3235	16.8402	15.6557	15.1667	17.2977	16.7493	16.1623	15.7644	19.5306	18.8717	11.6043	10.9534	14.6779	14.3688	14.0259	13.9085	16.9636	16.5944	18.809	18.2702	11.7973	11.428	14.3918	13.8844	18.7647	18.1127	17.5823	17.0918	16.2714	15.8623	18.0657	17.51	16.1415	15.8177	16.6957	16.3709	18.4319	18.1331	18.9852	18.6906	16.1726	16.02	17.7684	17.4854	17.5582	17.4077	14.814
2008-07-26	18.6325	18.2975	16.9886	16.712	15.3726	14.9896	16.9134	16.6212	15.8443	15.6545	19.1444	18.6506	11.1992	10.7783	14.3609	14.266	13.8573	13.8923	16.5458	16.4947	18.2468	18.1047	11.5648	11.2397	14.0358	13.6469	18.293	17.8184	17.1073	16.9219	15.8149	15.7499	17.5678	17.3039	16.0446	15.7068	16.6777	16.3959	18.2752	18.0217	18.8434	18.5828	15.9531	15.9978	17.5094	17.4645	17.3712	17.3898	14.7581
2008-07-27	18.9494	18.1794	17.1883	16.5914	15.7222	14.8988	17.1706	16.4731	16.1656	15.6683	19.6497	18.5169	11.5852	10.7956	14.3899	14.1766	13.796	13.8205	16.5416	16.352	18.3253	17.9306	11.8346	11.2432	14.3705	13.6186	18.7245	17.766	17.225	16.7943	15.8259	15.5954	17.7878	17.1849	16.2957	15.6762	16.9878	16.3883	18.4519	17.9764	19.0313	18.5415	16.0473	15.9899	17.3365	17.4435	17.3933	17.3807	14.7814
2008-07-28	19.4693	18.2512	17.5896	16.6623	16.2269	14.9618	17.677	16.5558	16.6855	19.3593	20.3928	18.6042	12.16	10.8089	14.6036	14.2692	13.8434	13.8839	16.7997	16.4888	18.7569	18.1044	12.2165	11.271	14.8994	13.681	19.4326	17.8576	17.6294	16.9297	16.1259	15.744	18.3171	17.3185	16.664	15.6906	17.4215	16.398	18.7549	17.9806	19.3448	18.5472	16.2709	15.9751	17.5971	17.4455	17.5799	17.3721	14.8344
2008-07-29	19.7723	18.2745	17.8727	16.6797	16.5087	14.9948	18.006	16.5703	16.9835	19.4597	20.7821	18.6434	12.7933	10.7335	14.8208	14.1986	13.9313	13.8578	17.0735	16.406	19.1585	17.9834	12.4673	11.1855	15.258	13.5648	19.9082	17.7094	17.9859	16.8187	16.4317	15.6524	18.7309	17.1933	16.9148	15.615	17.7187	16.2667	19.025	17.9301	19.6058	18.4949	16.3562	15.931	17.7744	17.4197	17.6677	17.3396	14.8557
2008-07-30	19.875	18.3257	17.8455	16.7297	16.6137	15.0414	18.0445	16.6278	17.0974	19.4756	21.0185	18.707	13.1376	10.712	14.795	14.1778	13.8884	13.8498	17.0436	16.3813	19.1694	17.9476	12.5587	11.1611	15.3874	13.5314	20.1046	17.6666	18.0066	16.786	16.4124	15.6251	18.8254	17.1566	17.0254	15.6012	17.8341	16.1965	19.0901	17.8855	19.6825	18.4561	16.4435	15.8269	17.7701	17.3625	17.7163	17.2631	14.8718
2008-07-31	20.2087	18.1682	18.1183	16.59	16.9225	14.8501	18.3858	16.4955	17.5068	19.333	21.4796	18.4748	12.574	10.7312	14.9482	14.176	13.9502	13.8417	17.2392	16.3717	19.4588	17.94	12.7402	11.0877	15.6513	13.4493	20.4724	17.5713	18.2244	16.7562	16.6319	15.6151	19.1269	17.1604	17.134	15.5449	17.8472	16.2788	19.2228	17.8626	19.8063	18.4296	16.5259	15.6844	17.9125	17.2269	17.7945	17.1458	14.8914
2008-08-01	20.2746	18.2161	18.3004	16.6045	16.9798	14.9683	18.5265	16.4759	17.7539	15.9164	21.4628	18.598	12.4538	10.8614	15.069	14.2081	14.0253	13.8223	17.3879	16.3805	19.6316	17.9818	12.8455	11.2283	15.8006	13.5842	20.6327	17.7156	18.5156	16.7151	16.7863	15.6281	19.2365	17.2544	17.0969	15.7151	17.7967	16.5304	19.1969	17.9375	19.7769	18.516	16.6749	15.9238	17.9007	17.1076	17.873	17.2717	14.9167
2008-08-02	19.9244	18.508	18.0512	16.899	16.6443	15.2228	18.1943	16.8164	20.5511	19.5734	20.9462	18.9479	12.2443	11.8359	15.0159	14.321	14.0275	13.8691	17.32	16.5188	19.4933	18.18	12.63	11.4344	15.4939	13.876	20.2117	18.0944	18.2761	17.0265	16.7006	15.781	19.0345	17.4523	17.0305	15.808	17.808	16.5669	19.141	18.0975	19.7184	18.6606	16.7849	16.0452	18.1607	17.5758	17.9933	17.4414	14.9339
2008-08-03	19.6424	18.1888	17.8251	16.6103	16.3733	14.8567	17.9135	16.5285	19.9587	18.7516	20.5508	18.4931	11.9932	11.1869	14.9296	14.3037	14.0209	13.9436	17.2162	16.5796	19.2997	18.1976	12.4301	11.1807	15.217	13.602	19.8347	17.7804	18.0907	16.9744	16.575	15.8415	18.7705	17.3435	16.9409	15.6063	17.7279	16.287	19.0706	17.9109	19.6436	18.478	16.7546	15.8755	18.1652	17.4373	17.9781	17.3083	14.935
2008-08-04	19.4612	17.9139	17.6875	16.3436	16.1944	14.6151	17.74	16.2137	19.1681	16.6597	20.289	18.1558	11.8229	11.8789	14.7762	14.0339	13.9592	13.8272	17.0248	16.2478	19.02	17.728	12.253	10.9022	14.9658	13.2103	19.5043	17.2742	17.8411	16.5569	16.3617	15.476	18.4832	16.8841	16.7611	15.3839	17.4471	15.9812	18.9421	17.7093	19.5041	18.2812	16.5485	15.6524	18.1613	17.2458	17.8629	17.1283	14.8986
2008-08-05	19.3943	17.9645	17.5835	16.3927	16.1441	14.6615	17.6378	16.2701	17.4691	15.1856	20.2404	18.219	11.933	11.996	14.6673	14.012	13.8719	13.8163	16.8801	16.2191	18.8705	17.6884	12.28	10.8836	14.9907	13.1824	19.5521	17.2372	17.7291	16.5231	16.2147	15.4445	18.4275	16.8475	16.6737	15.2588	17.3798	15.7706	18.7919	17.5757	19.3718	18.1535	16.4486	15.5929	17.8106	17.0307	17.7283	17.0498	14.8697
2008-08-06	19.6015	17.9944	17.6879	16.4205	16.3533	14.6985	17.8048	16.2951	20.6229	19.1558	20.5842	18.2626	12.2033	11.92	14.7748	14.0248	13.8917	13.8087	17.0161	16.2196	19.1086	17.6988	12.4914	10.9326	15.2905	13.2365	19.9655	17.2991	17.9493	16.5438	16.3763	15.4455	18.7319	16.8762	16.8375	15.3018	17.5954	15.843	18.9231	17.5979	19.5098	18.1771	16.5517	15.7115	17.8816	17.0959	17.8018	17.1385	14.8933
2008-08-07	19.9152	18.2365	17.9069	16.6286	16.6501	14.9819	18.1019	16.5044	20.6383	16.5345	21.05	18.6177	12.4723	12.5865	14.8321	14.0939	13.8868	13.7432	17.0955	16.2149	19.2769	17.7752	12.6658	11.2828	15.544	13.6373	20.332	17.7754	18.1053	16.6883	16.479	15.4493	18.983	17.1019	17.0463	15.5661	17.786	16.0645	19.0815	17.8032	19.6812	18.3832	16.8437	15.9633	17.8955	17.2425	17.9599	17.3234	14.943
2008-08-08	20.0532	18.546	18.1554	16.9211	16.7669	15.277	18.3238	16.8371	20.9783	19.6474	21.1256	19.0161	12.3955	12.908	15.2095	14.414	14.1177	13.9006	17.5646	16.6271	19.8336	18.342	12.8107	11.5572	15.7545	14.0421	20.5511	18.307	18.5735	17.1767	16.9694	15.9016	19.3569	17.626	17.1849	15.8237	17.9991	16.4729	19.276	18.0578	19.8568	18.6305	17.1056	16.1564	18.3515	17.5385	18.2059	17.5006	15.0017
2008-08-09	19.4603	18.6554	17.7844	17.0084	16.1435	15.3959	17.8235	16.9361	16.7557	19.5823	20.1906	19.176	11.6845	13.1194	15.0044	14.3655	14.1393	13.8353	17.3491	16.5356	19.3849	18.2576	12.223	11.645	14.9725	14.1314	19.5121	18.4128	18.113	17.1337	16.7014	15.8078	18.6807	17.6221	16.852	15.9199	17.7691	16.6957	19.0869	18.1588	19.6335	18.7278	16.7903	16.1928	18.6175	17.6423	18.1013	17.544	14.9623
2008-08-10	18.5342	18.6581	16.9399	17.0381	15.214	15.3704	16.8784	16.9729	17.4117	18.7055	18.9518	19.1453	11.0372	13.1713	14.4923	14.5358	13.9733	13.9675	16.7579	16.7898	18.4919	18.5595	11.5225	11.6407	14.029	14.1729	18.3052	18.4817	17.2795	17.3588	16.0414	16.0793	17.7093	17.8156	16.1959	15.9288	16.9938	16.7538	18.4809	18.1731	19.0326	18.7407	16.166	16.0739	17.9117	17.6325	17.5832	17.4704	14.8125
2008-08-11	18.3743	18.3583	16.7444	16.7697	15.1284	15.0506	16.6343	16.6843	17.5881	19.3057	18.8132	18.7305	11.0683	12.8893	14.2468	14.3352	13.7933	13.9015	16.3937	16.5598	18.0457	18.2145	11.4918	11.3713	13.9209	13.8116	18.1403	18.0216	16.9396	17.0364	15.6493	15.8233	17.3964	17.4435	16.0741	15.78	16.8548	16.5056	18.2527	18.0678	18.8297	18.6318	16.1128	15.8918	17.3916	17.4446	17.4436	17.32	14.797
2008-08-12	18.6019	18.015	16.9865	16.4418	15.3148	14.6917	16.9149	16.3395	16.4669	16.4124	19.071	18.2727	11.2102	12.7459	14.4854	14.2291	13.9152	13.8919	16.7035	16.4658	18.4668	18.0512	11.6816	11.1577	14.2047	13.5479	18.5136	17.6988	17.2993	16.8613	15.9884	15.7169	17.7769	17.2284	16.1538	15.5205	16.9435	16.0897	18.382	17.8311	18.9463	18.4002	16.2037	15.7071	17.6762	17.2735	17.5576	17.1692	14.8209
2008-08-13	18.5486	17.8241	16.9157	16.2565	15.2876	14.5104	16.8301	16.1318	16.803	18.9468	19.0293	18.0305	11.2502	12.1394	14.4337	14.0907	13.8725	13.8482	16.6254	16.3136	18.3769	17.8236	11.6914	10.9703	14.2029	13.3021	18.5071	17.3907	17.234	16.645	15.9056	15.5486	17.7252	16.9825	16.0762	15.2681	16.8205	15.7501	18.2993	17.5994	18.8667	18.175	16.0894	15.5026	17.6261	17.0774	17.4786	16.9984	14.7932
2008-08-14	18.8422	18.0961	17.126	16.4956	15.607	14.848	17.0841	16.3534	19.4172	19.198	19.4762	18.4372	11.46	12.7404	14.4735	14.0654	13.8487	13.7664	16.653	16.2089	18.4635	17.7331	11.8668	11.146	14.4253	13.4753	18.7945	17.5777	17.3374	16.6238	15.9449	15.4382	17.8902	17.0009	16.1865	15.3292	16.9048	15.7257	18.3563	17.6001	18.9325	18.1821	16.0982	15.492	17.4737	16.9036	17.4524	16.9603	14.7946
2008-08-15	19.1609	18.49	17.4329	16.8753	15.9027	15.215	17.4355	16.7868	20.1736	16.0082	19.878	18.9344	11.6156	13.0029	14.6474	14.2884	13.9331	13.8421	16.8747	16.4678	18.7682	18.1199	12.0181	11.4393	14.6461	13.8716	19.0825	18.0843	17.6013	16.9829	16.1878	15.7264	18.1723	17.4149	16.3331	15.4701	17.1018	15.7859	18.5134	17.7527	19.0838	18.328	16.1691	15.6816	17.5942	17.0245	17.5198	17.1058	14.8112
2008-08-16	19.1585	18.4946	17.4359	16.8817	15.898	15.2166	17.4372	16.7948	20.3394	19.6552	19.8708	18.9373	11.5837	13.0994	14.6314	14.38	13.9287	13.8832	16.8558	16.5827	18.7382	18.2816	11.9928	11.5301	14.6117	14.0014	19.0374	18.2533	17.5732	17.1252	16.1663	15.853	18.1376	17.5713	16.3518	15.5796	17.1095	16.121	18.5383	17.8383	19.1068	18.4139	16.2031	15.7981	17.6216	17.2425	17.5457	17.2217	14.8201
2008-08-17	19.1629	18.4842	17.4264	16.8709	15.9082	15.208	17.431	16.7822	20.336	19.4806	19.8887	18.9254	11.6003	13.1041	14.6006	14.3831	13.8969	13.8786	16.8093	16.582	18.6947	18.2865	12.0224	11.5516	14.6434	14.0268	19.08	18.2844	17.546	17.1339	16.1195	15.8531	18.1325	17.5863	16.3413	15.6916	17.0605	16.245	18.5283	17.9492	19.0969	18.5214	16.2906	15.8278	17.6479	17.2771	17.6023	17.2471	14.8389
2008-08-18	19.12	18.4659	17.4324	16.8579	15.8443	15.1842	17.4243	16.7694	20.2973	19.401	19.788	18.8953	11.6147	12.7497	14.6903	14.4042	13.9516	13.9169	16.9282	16.6321	18.8445	18.3298	12.0629	11.4851	14.71	13.9587	19.1659	18.2062	17.6689	17.1501	16.247	15.9045	18.2477	17.5797	16.2906	15.7962	17.0695	16.4188	18.4966	18.0362	19.062	18.6085	16.3122	15.9178	17.7766	17.3027	17.6428	17.3081	14.8464
2008-08-19	18.8483	18.4084	17.2035	16.8064	15.5672	15.1244	17.159	16.7128	20.0287	19.5983	19.4095	21.6283	11.5049	12.7861	14.6489	14.302	13.9525	13.8839	16.886	16.5157	18.7623	18.1547	11.958	11.3463	14.5725	13.7731	18.9869	17.9702	17.5841	16.9859	16.1961	15.7749	18.1295	17.39	16.1492	15.6884	16.8015	16.4191	18.3839	17.9939	18.9468	18.5581	16.1132	15.8412	17.7313	17.4224	17.5145	17.2836	14.7993
2008-08-20	18.636	18.3983	17.0122	16.7925	15.3556	15.1217	16.9421	16.6946	19.8224	19.5847	20.8487	18.8111	11.3867	12.5183	14.5745	14.2596	13.9301	13.8372	16.7988	16.4382	18.6273	18.0707	11.8489	11.3867	14.4242	13.8038	18.7946	17.9987	17.4581	16.9335	16.0978	15.6927	17.9779	17.3539	15.9262	15.665	16.4886	16.2098	18.1936	17.9128	18.7564	18.4877	15.8836	15.8178	17.4379	17.2212	17.3136	17.2299	14.7397
2008-08-21	18.5099	18.4857	16.8995	16.8652	15.2267	15.2183	16.8163	16.7737	19.6788	19.5564	18.9523	18.937	11.2892	12.8868	14.5357	14.3492	13.9298	13.8557	16.7611	16.5338	18.556	18.2261	11.7562	11.5418	14.3049	14.0061	18.6422	18.2552	17.3834	17.0865	16.0531	15.801	17.8774	17.5414	15.7708	15.8589	16.1595	16.421	18.0307	18.0841	18.5996	18.6575	15.7648	15.9436	17.2722	17.3258	17.2062	17.3286	14.7083
2008-08-22	18.4231	18.5927	16.8196	16.9621	15.1398	15.3246	16.7272	16.8835	19.595	19.7339	18.8369	19.08	11.1945	12.9932	14.4723	14.4281	13.9123	13.8858	16.6892	16.6289	18.4436	18.3655	11.6594	11.6364	14.1755	14.137	18.4763	18.4244	17.2768	17.2129	15.9722	15.9068	17.7493	17.6856	15.7418	15.8886	16.4153	16.487	17.9954	18.1503	18.5663	18.7158	15.8332	15.984	17.2053	17.454	17.2364	17.3792	14.728
2008-08-23	18.3998	18.4725	16.7953	16.8766	15.121	15.1668	16.6985	16.8006	19.5882	19.6443	18.817	18.8822	11.1319	12.6793	14.4316	14.4433	13.9196	13.9679	16.6581	16.7127	18.3753	18.4144	11.5411	11.4261	14.0294	13.9088	18.2944	18.157	17.1976	17.1978	15.9344	15.9902	17.6396	17.6088	15.728	15.6423	16.325	16.2393	17.9869	17.9569	18.5573	18.5212	15.869	15.8672	17.3593	17.4245	17.2891	17.3006	14.7365
2008-08-24	18.3547	17.9642	16.7608	16.388	15.062	14.615	16.6662	16.3059	19.5237	19.162	18.7379	18.595	11.1011	12.6001	14.3392	14.162	13.8845	13.8798	16.5478	16.4022	18.2142	17.9484	11.4308	11.0419	13.8778	13.4037	18.0995	17.5224	17.051	16.7554	15.812	15.6461	17.4734	17.1036	15.6206	15.1883	16.1306	15.7296	17.9074	17.5564	18.4766	18.1305	15.5654	15.3933	17.2699	17.1832	17.0744	16.9406	14.6455
2008-08-25	18.5607	17.734	16.8775	16.1696	15.3346	14.4348	16.7929	16.0258	19.7548	18.9344	21.3157	17.9311	11.3313	12.6142	14.2803	14.0565	13.7652	13.798	16.4114	16.2322	18.1189	17.7358	11.6643	11.0338	14.1371	13.3526	18.4181	17.4355	17.0326	16.5975	15.6776	15.4608	17.5499	16.9483	15.8289	15.0425	16.3645	15.4354	18.0073	17.3607	18.5903	17.9469	15.6855	15.0681	16.8919	16.5816	17.0824	16.6134	14.6905
2008-08-26	19.0972	17.8892	17.355	16.32	15.8504	14.5863	17.3521	16.1911	20.2845	19.0713	20.5877	18.1211	13.0721	12.5599	14.614	14.16	13.9071	13.842	16.8278	16.3592	18.7156	17.9164	12.0216	11.143	14.6446	13.5057	19.0811	17.6333	17.5618	16.7584	16.1388	15.6008	18.1439	17.1263	16.1527	15.0762	16.7406	15.668	18.3367	17.4036	18.9103	17.9873	15.9662	15.1962	17.3446	16.5332	17.3462	16.6959	14.762
2008-08-27	19.2341	18.0903	17.4974	16.5024	15.9732	14.8223	17.5114	16.3685	20.4117	19.2791	19.9762	18.4103	12.3301	12.7603	14.6738	14.1828	13.9452	13.8174	16.908	16.3544	18.8148	17.9393	12.0433	11.267	14.6825	13.6466	19.1299	17.7999	17.6421	16.8067	16.2245	15.5987	18.2169	17.2029	16.1485	15.2673	16.746	15.8825	18.3817	17.5415	18.9448	18.1253	16.0059	15.3886	17.4771	16.7862	17.3973	16.8704	14.7721
2008-08-28	19.2333	18.2229	17.4759	16.6401	15.9805	14.919	17.4944	16.54	20.4017	19.4131	19.9945	18.5602	12.432	12.8168	14.62	14.2927	13.9119	13.8854	16.8362	16.5094	18.7248	18.141	12.0204	11.3206	14.6442	13.7422	19.0804	17.9327	17.5686	16.9693	16.1475	15.7675	18.1485	17.3679	16.0735	15.3092	16.7264	15.9621	18.2882	17.6325	18.8572	18.2076	16.0009	15.4446	17.4476	16.9143	17.3883	16.9307	14.7708
2008-08-29	19.2546	17.9421	17.5266	16.3698	15.988	14.6107	17.5417	16.2693	20.4027	19.1391	19.9928	18.2047	13.3994	12.369	14.6513	14.217	13.9216	13.8876	16.8738	16.4519	18.7832	18.0308	12.0659	11.1427	14.707	13.5278	19.1628	17.6733	17.6225	16.8424	16.1901	15.7016	18.214	17.2071	16.0937	15.3346	16.8055	16.0416	18.3063	17.621	18.8753	18.2005	15.9723	15.4388	17.4601	16.9132	17.3733	16.9265	14.7635
2008-08-30	18.9597	17.8346	17.3193	16.2669	15.6624	14.5392	17.292	16.1278	20.016	19.0325	19.5387	18.0594	13.2043	12.2676	14.7185	14.1023	14.0255	13.8316	17.0001	16.3033	18.8786	17.8255	11.8946	11.0422	14.5143	13.3791	18.9185	17.4774	17.6574	16.6655	16.3144	15.5383	18.1651	17.0156	16.0201	15.2439	16.5738	15.9352	18.2661	17.5843	18.8303	18.1596	15.7922	15.3536	17.3953	16.8868	17.2471	16.864	14.7141
2008-08-31	18.0908	18.1402	16.5004	16.5449	14.7028	14.8789	16.4667	16.4129	19.2871	19.311	18.4988	18.4826	12.5689	12.3985	14.2971	14.134	14.0315	13.7738	16.6929	16.2749	18.2981	17.8476	11.1566	11.1815	13.6079	13.5358	17.8102	17.6607	17.075	16.7197	15.9666	15.5138	17.323	17.1502	15.4071	15.2373	15.4439	16.028	17.798	17.5312	18.3606	18.1131	15.4404	15.385	17.1087	16.7893	16.9613	16.8686	14.6084
2008-09-01	17.3681	18.2685	15.7931	16.6847	14.02	14.9596	15.6756	16.592	18.5801	19.4595	18.1244	18.9682	12.2965	12.5524	13.7719	14.3547	13.7118	13.9383	15.923	16.6122	17.2698	18.2649	10.795	11.2028	13.0622	13.5997	17.0844	17.7597	16.4057	16.8849	15.1183	15.8788	16.4392	17.4492	14.8633	15.1688	15.2672	15.5532	17.2191	17.5115	17.809	18.0895	15.1132	15.3658	16.7031	16.8903	16.6647	16.873	14.5067
2008-09-02	17.4847	17.8268	15.9249	16.2499	14.1779	14.4719	15.7701	16.1652	15.3077	19.0284	17.5954	20.266	12.4524	11.8376	13.9949	14.0648	13.8109	13.8971	16.2005	16.3592	17.6605	17.8472	10.8603	10.7848	13.1519	13.1146	17.1992	17.1905	16.4964	16.611	15.4239	15.5983	16.8173	16.9253	14.8335	14.635	15.403	15.0092	17.1609	17.0587	17.755	17.6528	15.098	15.0834	16.496	16.7213	16.6212	16.6458	14.5133
2008-09-03	17.9169	17.4972	16.339	15.9291	14.6511	14.1633	16.187	15.8027	19.1149	18.7057	18.2536	20.4445	12.7157	11.734	14.0461	13.7774	13.753	13.7786	16.1805	16.0157	17.6973	17.3586	11.1408	10.4755	13.4634	12.6883	17.5601	16.6453	16.5961	16.1706	15.4074	15.2207	16.974	16.4416	15.1671	14.4795	15.8343	14.7998	17.4263	16.836	18.0158	17.4427	15.2809	14.909	16.6472	16.3845	16.7734	16.4676	14.5723
2008-09-04	18.2725	17.202	16.677	15.5916	14.9944	13.808	16.5666	15.5273	19.4634	18.4227	18.6609	19.911	12.8761	11.7719	14.2972	13.6916	13.889	13.7727	16.5166	15.9586	18.1497	17.2602	11.3204	10.3107	13.7436	12.5001	17.9353	16.4287	16.9757	16.0522	15.7753	15.1593	17.3738	16.3083	15.3126	14.4878	16.0816	14.8973	17.6203	16.8672	18.1975	17.4717	15.3978	14.8601	16.8379	16.3313	16.8857	16.4236	14.6048
2008-09-05	17.9673	16.8273	16.3859	15.2061	14.6014	13.4372	16.3212	15.1258	19.1656	18.0581	18.4536	18.8209	12.5609	11.6905	14.1665	13.5808	13.9184	13.7346	16.4531	15.8394	17.9945	17.0868	10.9479	10.174	13.3151	12.3227	17.4325	16.2087	16.7633	15.8878	15.7014	15.0289	17.0985	16.1281	14.8355	14.3709	15.5488	14.7955	17.2398	16.7617	17.8265	17.3711	15.1763	14.6131	16.8258	16.1962	16.7292	16.2159	14.524
2008-09-06	17.3717	16.8042	15.7894	15.1994	14.0107	13.4325	15.6878	15.0911	14.6081	18.0336	17.4318	19.0866	12.2022	11.3495	13.8544	13.4895	13.8099	13.7255	16.107	15.7803	17.4887	16.9886	10.5594	10.0101	12.8034	12.1382	16.7921	15.9991	16.2883	15.7687	15.321	14.9667	16.5709	15.999	14.5047	14.0098	14.9722	14.3161	16.8711	16.4467	17.4767	17.0732	14.7832	14.3345	16.3964	15.8314	16.3744	15.9485	14.3875
2008-09-07	17.1753	16.6942	15.5893	15.0453	13.8137	13.2844	15.4798	14.9943	18.3935	17.9316	18.6944	18.8974	12.0361	11.3299	13.7214	13.3287	13.7742	13.6894	15.977	15.6478	17.2924	16.7874	10.3689	9.77152	12.5657	11.8575	16.5035	15.6709	16.0923	15.5527	15.1789	14.8253	16.3531	15.7684	14.5097	13.5488	15.0563	13.8629	16.8643	15.9887	17.4706	16.6447	14.6517	14.0108	16.0806	15.5142	16.2311	15.6427	14.3556
2008-09-08	17.101	16.4094	15.513	14.7252	13.739	12.9856	15.4011	14.6966	18.3214	17.6577	19.9122	16.9896	11.4908	11.2385	13.6142	13.2557	13.7495	13.6445	15.8808	15.5337	17.1451	16.6323	10.2071	9.72688	12.3696	11.7739	16.2695	15.5501	15.9392	15.4292	15.0745	14.6983	16.1843	15.6313	14.5161	13.23	15.251	13.5339	16.8769	15.6658	17.4824	16.3421	14.6215	13.7702	16.0764	15.1579	16.2072	15.4001	14.3418
2008-09-09	17.1867	16.4392	15.6158	14.803	13.8493	13.0527	15.4766	14.7096	18.403	17.6808	20.0302	16.7124	11.2006	10.484	13.6042	13.3005	13.7082	13.6572	15.8106	15.5755	17.0664	16.694	10.2869	9.78726	12.4299	11.8477	16.3158	15.6384	15.9061	15.4914	14.9952	14.7433	16.1512	15.6982	14.4239	13.375	15.1773	13.7805	16.8007	15.7705	17.4095	16.4368	14.7368	13.9184	16.0867	15.146	16.2964	15.5289	14.3928
2008-09-10	16.9769	16.6145	15.3388	14.9866	13.5636	13.2274	15.298	14.8971	18.2064	17.8507	19.7729	16.7478	11.1255	11.1108	13.539	13.3417	13.7738	13.6653	15.8897	15.6076	17.1308	16.7435	9.99976	9.85095	12.1654	11.9217	16.06	15.7242	15.8664	15.5461	15.09	14.7775	16.1088	15.7566	14.053	13.7475	14.7925	14.2647	16.4775	16.1262	17.1037	16.77	14.58	14.1222	16.1608	15.4388	16.1853	15.7304	14.3113
2008-09-11	16.4802	16.6069	14.798	14.9643	13.0543	13.2068	14.7735	14.8959	17.727	17.8453	19.1521	16.9197	9.47995	10.7741	13.2275	13.407	13.6593	13.6749	15.5527	15.6539	16.6481	16.8175	9.63937	9.96037	11.6955	12.0464	15.4767	15.8671	15.4131	15.6319	14.7229	14.8264	15.6195	15.8488	13.7255	13.6462	14.3808	14.102	16.1439	16.0827	16.7891	16.7314	14.3121	14.0729	15.7988	15.5021	15.9265	15.6952	14.2074
2008-09-12	16.1927	16.6667	14.4736	15.0531	12.7561	13.2913	14.4705	14.9465	17.451	17.894	18.796	16.5368	9.29935	10.9221	13.0651	13.4404	13.6222	13.7009	15.4272	15.7148	16.46	16.8978	9.40594	9.96759	11.4266	12.0739	15.167	15.9132	15.2065	15.6912	14.5911	14.8944	15.4054	15.9142	13.272	13.3534	13.9134	13.6637	15.7263	15.7941	16.4003	16.4608	14.0754	13.9848	15.5416	15.3623	15.7011	15.6064	14.1089
2008-09-13	15.9153	16.4647	14.1342	14.7598	12.4566	13.023	14.1829	14.7646	17.1881	17.7146	18.4579	18.9059	9.1525	11.2186	12.8771	13.198	13.5708	13.6873	15.271	15.6041	16.2317	16.7063	9.15679	9.52483	11.1342	11.6054	14.8259	15.4047	14.9658	15.4174	14.4262	14.7865	15.1573	15.6373	12.8458	13.1533	13.3756	13.5378	15.2938	15.5956	15.9974	16.2751	13.7213	13.726	15.187	15.1763	15.3578	15.3613	13.9485
2008-09-14	15.8327	16.0627	14.0794	14.318	12.3947	12.617	14.0848	14.3354	17.1039	17.3267	18.3502	16.1096	9.13625	10.9291	12.8101	12.8296	13.5325	13.562	15.1684	15.243	16.0902	16.1894	9.10739	9.08664	11.0485	11.0587	14.7052	14.7428	14.8508	14.9131	14.3117	14.3983	15.0282	15.1063	12.9034	13.0558	13.3957	13.4095	15.3162	15.4985	16.0137	16.1832	13.6609	13.7039	14.9233	14.9604	15.2838	15.3253	13.9559
2008-09-15	16.0785	16.1017	14.3952	14.4147	12.6727	12.692	14.3334	14.3601	17.3351	17.2988	18.6492	15.8301	9.67555	9.90309	12.9969	12.7235	13.5508	13.5117	15.2564	15.1052	16.2346	15.997	9.42446	8.98808	11.3815	10.9137	15.0643	14.5518	15.0539	14.7465	14.3965	14.2463	15.2266	14.9236	13.1042	13.0409	13.5201	13.3942	15.5208	15.483	16.2039	16.168	13.7826	13.7572	15.0602	15.076	15.4032	15.3821	14.0115
2008-09-16	16.4937	16.3483	14.8787	14.6951	13.1246	12.9518	14.7585	14.6176	17.7319	17.5866	19.1379	16.1368	9.57141	9.56693	13.2704	12.9115	13.6257	13.528	15.5053	15.1824	16.6035	16.1252	9.79852	9.30788	11.835	11.2426	15.6043	14.9007	15.4306	14.9401	14.6642	14.3176	15.6298	15.1066	13.4679	13.1862	13.9714	13.6355	15.8621	15.6166	16.5207	16.2904	14.0585	13.8696	15.2873	15.1453	15.6613	15.4868	14.1419
2008-09-17	16.8564	16.7649	15.266	15.1851	13.4996	13.4251	15.1379	15.0306	18.083	16.4937	19.6257	16.665	9.69716	9.63073	13.4124	13.2835	13.6842	13.6008	15.6725	15.4685	16.8405	16.5666	9.94977	9.8831	12.0419	11.9079	15.8678	15.6702	15.645	15.4297	14.8475	14.621	15.8635	15.6277	13.79	13.5327	14.3336	14.0795	16.1875	15.9448	16.8266	16.5955	14.3786	14.1639	15.6605	15.4016	15.964	15.7608	14.2661
2008-09-18	16.965	17.158	15.3654	15.585	13.5929	13.8175	15.2624	15.4483	18.19	18.3739	19.6098	17.1866	9.77884	9.87929	13.4695	13.5583	13.6877	13.7124	15.7058	15.7917	16.8979	17.0262	10.0574	10.181	12.1613	12.3147	16.0021	16.1876	15.7182	15.8465	14.8823	14.9757	15.9428	16.0835	14.0166	13.8735	14.5627	14.4542	16.4098	16.2808	17.036	16.9116	14.5022	14.4902	15.9119	15.7795	16.0929	16.0665	14.3006
2008-09-19	17.2189	16.8608	15.6606	15.1962	13.9091	13.4295	15.4921	15.1834	18.4328	18.0849	20.0646	16.7799	10.0372	9.62957	13.5858	13.4185	13.7039	13.7432	15.7936	15.7859	17.0403	16.9758	10.259	9.83039	12.3957	11.9637	16.2748	15.8226	15.8793	15.7042	14.9767	14.979	16.1214	15.9365	14.2415	13.6825	14.8164	14.2668	16.6279	16.1543	17.2414	16.7941	14.6933	14.3627	16.0089	15.9176	16.2527	15.9812	14.381
[truncated: 33,340 more rows]
[truncated: 13 more columns]
