# Supplementary material for: Waning habitats due to climate change: effects of streamflow and temperature changes at the rear edge of the distribution of a cold-water fish
Source: Copernicus journal article supplement (doi:10.5194/hess-2016-606), 2017-01-09
Supplement: Supplementary file 1 [file Santiago_SM02_DatasetS1.xlsx]

## Sheet: Dataset S1. DMAT-ensemble
Dataset S1. Climate change predictions (daily mean air temperature [DMAT]) per meteorological station and scenario. Ensemble of nine models. Unit: Celsius degrees.
Meteo station (code)	2440	2440	2462	2462	2516	2516	2828	2828	3013	3013	3104	3104	8381B	8381B	8434A	8434A	8478	8478
SCENARIO	RCP4.5	RCP8.5	RCP4.5	RCP8.5	RCP4.5	RCP8.5	RCP4.5	RCP8.5	RCP4.5	RCP8.5	RCP4.5	RCP8.5	RCP4.5	RCP8.5	RCP4.5	RCP8.5	RCP4.5	RCP8.5
1/1/2006	3.1	3.1	-0.4	-0.3	3.1	3.1	2.9	3	2.15556	2.41111	2.5	2.7	4.95556	5.16111	8.2	8.25	12.9111	12.8222
2/1/2006	2.7	2.6	0	0	2.5	2.3	2.7	2.6	1.51667	1.53889	2.1	2.2	4.04444	4.27222	7.41667	7.28333	12.7444	12.6556
3/1/2006	3.6	3.4	0.9	1	3.6	3.3	3.5	3.3	2.12778	1.82778	2.8	2.6	4.35556	4.33889	8.16111	7.91111	14.0222	13.7111
4/1/2006	4.7	4.8	1.5	1.9	4.8	4.8	4.6	4.7	4.27778	4.01667	4.3	4.3	6.13333	5.98889	9.93889	9.80556	15.7444	16.0667
5/1/2006	3.7	4	-0.3	0.8	4.6	4.7	3.9	4.4	3.35	3.3	3.6	3.8	5.32778	5.22778	8.96111	9.47778	14.9	15.9556
6/1/2006	4.4	4.6	-0.3	1	5.7	5.3	4.2	4.5	3.81667	3.53333	4.3	4.3	5.65556	5.69444	9.18889	9.69444	14.2778	15.2333
7/1/2006	3.7	4.3	-1.2	-0.1	5	5.1	3.8	4.1	3.72778	3.71111	4.2	4.7	6.27222	6.66111	8.67222	9.38889	13.5	14.5333
8/1/2006	3.3	3.9	-0.3	0.8	4.4	4.7	3.6	4.1	2.96667	3.38889	3.7	4.4	4.85556	5.47778	7.82778	8.68889	13.2333	14.1778
9/1/2006	3.8	4.3	0.5	1.3	5.1	5.3	4.3	4.7	3.64444	4.12222	4.3	4.7	4.96111	5.58889	9.02222	9.8	15.3444	16.3444
10/1/2006	4	4	-0.2	-0.1	5.2	5.2	4.3	4.6	4.08889	4.17778	4.4	4.2	5.75556	5.96667	9.66667	9.9	15.0889	15.6889
11/1/2006	2.7	4	-1.2	0	3.8	5.3	3.1	4.2	2.79444	4.75	3.3	4.6	4.66667	6.16111	8.66111	9.68889	14.4778	15.4556
12/1/2006	2.6	3.5	-0.3	0	4.3	4.9	3.5	4	3.13889	4.16667	3.8	4.5	4.78333	6.79444	9.14444	10.2167	14.4111	15.4667
13/1/2006	2.6	4.3	-0.2	0.8	3.7	5.4	3.2	4.8	3.28333	4.33889	3.3	4.8	5.55	6.48333	9.36667	10.4167	14.7889	16.1222
14/1/2006	3.3	4.8	-0.1	1.6	4	5.8	3.4	5.3	3	4.27778	3.5	5.1	4.43889	5.83889	9.35	10.85	14.8667	16.3111
15/1/2006	3.1	5	0	1.8	4.1	5.9	3.8	5.4	2.71667	4.64444	3.1	5.1	4.39444	6.23889	8.81667	10.7167	14.5222	16.3333
16/1/2006	2.9	4.6	-0.5	0.9	3.7	5.7	3.7	5.4	2.5	3.5	2.9	4.2	4.05556	5.28889	8.12222	9.51667	13.4667	14.8333
17/1/2006	2	3.9	-1.2	1.3	3.5	5	3	4.2	2.27778	2.92778	2.5	4.1	4.45	4.54444	7.96667	8.9	13.4333	15.1333
18/1/2006	3.7	6.4	0	3.8	5.1	7.4	3.9	6.3	2.5	5.26111	3.8	6.4	3.90556	6.04444	7.89444	10.9222	13.5	17.4222
19/1/2006	4	7.6	-0.3	4.6	5.2	8.1	4.2	7.2	2.90556	6.38333	4	7.3	5.06667	7.61667	8.15556	12.5444	13.7111	18.7556
20/1/2006	4.3	7	0.4	4.2	5.2	7.3	4.5	6.9	3.91667	6.07778	4.7	6.4	5.71667	7.26667	9.30556	11.9278	15.0444	18.0667
21/1/2006	3.4	7.2	0	4.8	4.4	8	3.9	7.4	3.25	6.25556	3.5	6.9	5.19444	7.78333	9.19444	11.4944	15.1444	17.9556
22/1/2006	3.9	6.6	-0.1	3.8	5.6	7.8	4.4	7.1	3.72222	6.06111	3.9	6.2	5.43889	7.77778	9.5	11.8889	15.3778	18.5222
23/1/2006	5	5	0.6	2.9	6.5	6.4	5.3	6	5.09444	4.81667	5.4	5.4	6.06667	6.73333	10.2278	10.5611	16.2222	16.5222
24/1/2006	4.7	5.9	-0.1	3.5	6.2	7.1	5	6.9	5.27222	5.26111	5.2	6.1	7.32778	7.55	10.2111	10.6722	15.6889	16.9111
25/1/2006	4.2	5.7	-0.6	2.6	5.5	7.2	4.7	6.8	3.76667	5.72778	4.2	5.8	6.29444	7.67778	9.72222	11	15.1556	17.2333
26/1/2006	3.1	5	-1.5	1.8	4.5	6.5	4	6.1	2.55	4.50556	3.1	5.2	4.51667	7.5	8.98889	10.3222	14.7	16.3111
27/1/2006	3.5	5.6	-0.7	1.7	5	7.2	4	6.4	2.76111	5.30556	2.8	5.8	4.28333	8.28889	8.33333	10.5944	13.9	16.0667
28/1/2006	3.4	4	-0.7	0.1	5	5.8	4	5.3	3.4	3.92778	3	4.1	5.46111	7.10556	8.22222	9.79444	13.4444	15.5889
29/1/2006	4.2	3.8	0.2	0.4	5.9	5.6	4.5	4.9	4.42778	3.97778	4.1	4.2	6.38889	6.78333	9.46111	9.48889	15.0556	15.2667
30/1/2006	4	3.8	-0.9	-0.5	5.7	5.8	4.2	5.1	4.21667	4.25556	3.6	4.3	7.11111	6.66667	9.37222	#N/A	14.6111	15.7667
1/2/2006	4.9	2.8	0.6	-0.6	6.5	4.6	4.7	3.8	4.91667	3.09444	4.9	3.2	8	5.93889	10.3	9.08889	16.2111	14.5333
2/2/2006	4.3	2.5	-0.2	-1.5	6.1	4.1	4.8	3.2	4.11111	2.47222	4.3	2.6	6.83333	4.91111	9.85556	8.93333	15.4111	14.5667
3/2/2006	3.9	2.6	-0.6	-1.5	5.8	4.8	4.4	3.6	3.70556	2.72778	4.2	2.8	6.25556	5.01111	9.21667	9.12222	14.8778	14.9222
4/2/2006	6.2	3.6	0.9	-0.5	7.9	5.6	6.1	4.2	5.78889	3.48333	6.1	3.8	8.60556	5.36667	11.1389	9.58889	17.0556	15.7444
5/2/2006	4.6	3.6	-0.6	-0.6	6.3	5.5	5	4.3	4.70556	3.66111	5	3.7	6.94444	5.48333	10.3278	10.4278	16.4333	16.1556
6/2/2006	4.8	6.4	-0.3	1.5	6.6	7.9	5.4	5.9	4.21667	6.06111	4.8	6.1	6.65556	6.89444	10.1	11.5667	16.1333	17.7222
7/2/2006	4.3	6	0.1	1.9	6.2	7.5	5.1	6.2	3.75556	6.06111	4.5	6.1	6.27222	7.38333	9.87222	12.1278	15.9111	18.8111
8/2/2006	3.7	5.6	-0.1	1.5	5.6	7	4.6	6.3	3.68333	4.94444	4	5.6	6.70556	6.97222	9.66111	10.8667	15.5	16.9889
9/2/2006	3.6	5.4	0.7	1	5.4	6.6	4	6	3.24444	3.96667	3.7	5	6.01111	6.7	8.89444	10.2389	14.9667	16.2667
10/2/2006	4.2	4.6	0.6	0.2	6.4	6.9	5.3	5.7	3.45556	4.29444	3.8	4.6	6.21111	5.77778	9.02222	10.2556	14.8778	16.3778
11/2/2006	4.8	3.7	1.5	-0.1	6.7	6.2	5.6	4.8	4.77222	3.52778	5	4	6.72778	5.88333	10.1944	9.15	16.2444	15.9778
12/2/2006	5.8	4.2	1.4	0.7	7.4	6.2	6.3	4.6	5.47222	4.43889	5.4	4.6	7.65556	6.42778	10.7	10.1056	16.6222	16.8222
13/2/2006	5.6	3.6	1	-0.6	7.5	6	6.3	4.5	5.30556	4.18889	5.4	4.1	8.41111	7.51667	10.9111	10.4	16.4889	16.2556
14/2/2006	5.7	2.6	1	-1.6	8.1	5	6.6	3.9	5.71111	2.71111	5.9	3.3	8.8	6.12778	10.9278	8.92778	16.1	14.2333
15/2/2006	4.7	3.6	0	-0.4	7.1	6.1	5.8	4.7	4.52778	4.33333	4.6	4.3	7.47778	6.82778	9.67778	9.84444	15.3111	15.4444
16/2/2006	3.3	3.7	-1.2	0	5.8	6	4.6	4.7	3.66667	4.25	3.2	3.8	6.53333	6.82222	9.28333	9.95556	14.8778	15.9333
17/2/2006	3.9	4	-0.8	-0.1	6	6.5	4.9	4.9	3.81111	4.72778	3.8	4.2	5.93889	6.54444	8.5	9.6	13.5444	16
18/2/2006	4.2	4.5	-0.2	-0.1	6.2	6.9	5.3	5.3	4.19444	4.61111	4.5	5.3	7.17778	6.36111	9.6	10.0333	14.5222	15.7333
19/2/2006	3.7	3.4	-0.4	-1.1	5.8	5.9	4.4	4.4	3.47778	4.09444	3.8	4	6.39444	6.59444	9.37222	9.99444	15.4111	15.8222
20/2/2006	4.9	3.4	0.5	0	7.6	5.6	5.8	4.4	4.70556	4.20556	5.2	4.3	6.48333	6.87222	10.1556	9.98889	16.2778	15.9444
21/2/2006	5.1	4.2	0.1	1	7.4	6.7	5.9	5.2	6.06111	4.71111	5.5	4.6	8.07222	6.98333	10.8389	10.3333	16.6778	16.4222
22/2/2006	6.3	4.6	1.1	0.9	8.5	6.8	6.9	5.4	7.07222	4.88889	6.4	5.2	8.95	6.92222	11.4722	10.4722	17.1222	17.2556
23/2/2006	6	5	1	0.4	8.2	7	6.8	5.7	6.22778	5.61111	6.1	5.5	9.28333	7.95556	11.8333	10.8278	16.9222	17.3889
24/2/2006	4.7	3.4	-0.5	-0.8	7.2	6.5	5.9	4.9	5.20556	4.54444	5	4.1	7.54444	7.25	10.1222	10.2444	15.7111	15.9111
25/2/2006	2.9	3.9	-1.7	-0.1	5.8	6.2	4.4	4.8	3.97222	4.15	3.3	4.1	6.25556	6.44444	9.04444	9.73333	14.8778	16.0444
26/2/2006	3.3	4.4	-0.7	1.4	6.2	6.9	4.8	5.2	3.74444	4.8	3.9	5.2	5.99444	7.02778	9.45	10.6	15.7556	17.4444
27/2/2006	4.1	5.5	0.4	1.9	6.7	8	5.4	6.2	4.06111	5.61111	4.1	6.2	5.97778	8.30556	9.25556	#N/A	15.7111	17.5889
28/2/2006	4.9	5	0.8	1.3	7.8	7.8	6.1	6.5	5.50556	5.21111	5.3	5.6	7.52778	8.03889	10.45	#N/A	16.6444	16.7889
1/3/2006	4.7	4.9	0.2	0.6	7.6	7.1	6.1	6.1	5.02222	5.12222	5.1	5.5	7.81667	8.21667	10.8611	11.5111	17.1333	17.9111
2/3/2006	6.2	4.6	2.1	0.8	8.2	6.7	6.7	5.9	6.61111	4.98333	6.4	5.4	9.15556	7.67222	12.5889	11.0944	19.0778	17.4889
3/3/2006	7.1	5.6	2.9	1.6	9.7	8	8.1	7	7.66667	6.25	7	6.4	9.52778	8.55556	12.6333	12.1444	18.7889	19.1444
4/3/2006	6	4.7	1.3	-0.1	8.3	7.3	7.1	6.5	6.32222	5.11111	6	4.8	9.01667	7.65	11.6389	11.3611	17.6444	17.3444
5/3/2006	5.5	4.6	1.2	0.1	7.7	7.2	6.6	6	5.60556	4.64444	5.5	4.8	8.03333	7.61111	11.1389	11.0056	17.3222	17.0556
6/3/2006	6.7	5.5	3.4	0.4	9.3	8.3	7.5	7.1	6.82222	5.60556	7	5.6	8.67222	8.06667	11.9889	11.4	18.6778	17.3778
7/3/2006	6.9	5.8	3.5	0.4	9.1	7.9	8	6.8	6.85	6.13333	7.2	5.8	9.06667	8.81111	12.2611	11.8278	18.7444	17.1778
8/3/2006	8.7	4.2	4.9	-0.9	10.6	6.5	9.8	5.8	7.72778	4.75	8.4	4.3	9.14444	7.23333	12.3444	10.4222	19.0667	15.8556
9/3/2006	7.2	3.9	3.8	-0.8	9.5	6.3	9	5.7	7.08333	4.25	7.5	4.3	9.80556	7.35556	12.6611	9.8	19.5444	16.2333
10/3/2006	7.6	3.4	4.7	-1.7	10.2	5.7	8.8	5	7.10556	3.75556	7.7	3.6	9.11667	6.81667	12.9167	10.1611	19.4444	16.1
11/3/2006	8.6	3.6	4.6	-0.8	11	6.1	10.4	5.2	8.15556	4.17778	8.2	4	10.05	6.07778	12.7444	10.2278	18.7889	16.4778
12/3/2006	7.7	4.6	3.3	0	10.5	6.8	9.8	5.6	6.93889	5.15556	7.7	4.9	9.49444	6.93889	11.3056	11.3944	17.5667	17.3333
13/3/2006	7.2	3.9	3.1	-0.2	10.2	6.2	9.4	5.5	6.43333	3.99444	7.3	4.3	9.26667	6.13889	11.2056	10.25	17.3333	15.8667
14/3/2006	8.6	5.4	4.8	0.8	11.6	7.8	10.6	6.9	8.11111	5.62222	8.7	5.4	10.3833	7.25556	13.0556	10.5056	19.7778	16.5667
15/3/2006	8	4.8	3.2	0.3	10.8	7.3	10.1	6.1	7.51111	5.36667	7.8	5.2	9.8	7.88333	12.6889	11.4278	19.0667	17.6333
16/3/2006	6.4	5.9	1.4	1.7	9.3	8.2	8.5	7	6.47778	5.87778	6.4	6.2	8.97778	7.98333	11.45	11.0222	17.5556	17.5667
17/3/2006	6.5	6.8	1.6	2.1	9.3	8.9	8.8	7.9	6.13333	7.31111	6.4	6.9	8.73889	9.45556	11.0833	12.25	17.2333	19.4444
18/3/2006	5.5	4.4	0.8	-1.1	8.6	6.7	8.1	5.9	5.49444	5.18333	5.5	4.5	8.22222	8.16111	10.8444	11.1611	16.8	16.7889
19/3/2006	6.7	4.1	2	-0.9	9.4	6.7	8.7	5.6	6.35556	4.48889	7	4.1	8.43889	6.59444	11.3611	10.4556	18.0889	16.2556
20/3/2006	6.8	6.7	1.5	1.2	9.1	8.5	8.3	7.2	6.44444	6.43889	7	6.5	8.91667	7.97778	12.55	11.95	19.2778	18.5889
21/3/2006	5.7	7	0.9	2.1	8.4	9	7.7	7.9	6.15556	7.18889	6.1	7.1	8.60556	9.15	11.6111	12.6778	18	20.1222
22/3/2006	5.4	6.9	0.6	2.1	8	9.3	7.4	8.1	5.79444	6.98333	5.7	6.9	7.94444	9.78333	11.3278	13	17.5444	19.9
23/3/2006	7.1	7.1	2.9	1.9	9.7	9.4	9	8	6.51111	7.15	7.3	7.1	8.64444	9.84444	11.7833	13.0278	18.6667	19.0667
24/3/2006	7.8	7.6	3.7	1.9	10.1	10.1	9.5	8.4	7.41667	7.67222	8	7.3	9.83889	9.8	12.4389	12.1944	19.1778	18.3667
25/3/2006	9	6.8	5.3	1.3	11.4	9.3	10.6	7.9	8.40556	7.29444	8.9	6.5	10.4778	9.47778	13.1833	11.4556	20.3556	17.6333
26/3/2006	8.9	5.9	4.5	0.4	11.3	8.4	10.5	7.3	8.71667	6.47222	8.8	6.1	11.2889	9.06111	14.1111	11.1556	21.0333	17.0556
27/3/2006	6.3	5.6	1.3	1.5	8.8	8.8	8.2	7.5	6.69444	6.55	6.1	6.5	9.15556	8.56667	12.6278	11.3722	19.1667	17.5
28/3/2006	6	6.3	1	1.5	8.8	9.1	8.2	8.4	6.40556	6.14444	5.9	6.2	8.90556	8.27222	11.7667	10.8222	18.5667	16.9778
29/3/2006	6.5	7.1	1.3	2.3	8.9	10	8	9.1	6.91667	6.80556	6.9	7.1	9.36667	8.55	12.7667	11.2667	19.4333	16.9778
30/3/2006	6.5	7.9	1.4	3.6	9.4	10.9	8	9.5	7.42222	7.71667	7.1	8	9.80556	9.94444	13.3333	#N/A	20.1889	19.1667
1/4/2006	6.9	8.3	2.1	3.9	9.6	11	8.2	10	7.3	8.90556	7.5	8.9	9.33333	11.2167	12.6778	13.3056	19.3889	20.7556
2/4/2006	7.9	7.4	3.3	2.4	10.6	10.3	9.6	9.3	8.76667	8.46111	8.5	7.6	10.7556	11.3556	13.8	12.8556	20.1556	19.3889
3/4/2006	7	6.4	2.4	1	9.7	9.2	8.9	8	8.19444	7.55	8	6.8	10.7611	10.7778	13.6833	12.0611	19.8	17.8778
4/4/2006	6.7	6.3	1.5	1	9.2	9.2	8.3	7.8	7.27222	7.45556	6.8	7.1	10.0778	9.86111	13.0833	12.4833	19	18.5889
5/4/2006	6.2	6.2	0.8	1.1	8.5	9.2	7.5	8.3	6.71111	7.1	6.5	6.9	9.44444	9.61667	11.8833	12.2889	17.8444	17.8222
6/4/2006	6.7	6.8	1.5	2.2	9.1	9.9	7.6	8.5	6.92222	7.42222	7.1	7.3	9.45556	9.91667	12.5722	12.5333	18.7889	18.5444
7/4/2006	6.8	8	1.6	2.7	10	10.7	8.6	9.7	7.55556	8.58889	7.1	8	10.2056	10.7056	12.55	13.2389	18.9	19.7889
8/4/2006	6.4	7.7	1.5	3	9	10.4	7.6	9.3	7.27778	8.57778	6.7	8.4	10.0222	10.8	12.4556	13.3056	18.6444	19.6333
9/4/2006	7.1	7.7	2	2.8	9.6	10.7	8.5	9.4	7.64444	8.14444	7	7.8	9.95556	10.7556	12.6	13.4056	18.7333	20.1667
10/4/2006	7.2	8.4	2.4	3.5	9.8	11.1	8.6	10	8.28889	8.65	7.7	8.1	10.8389	10.5222	13.8222	13.5167	20.1444	20.2667
11/4/2006	6.7	9	1.8	4.5	9.4	12.1	7.9	11	7.4	8.87778	7.4	9	10.4056	11.2944	13.3	13.5556	20.0444	20.7778
12/4/2006	7	9.4	2.8	4.5	9.6	12	8.3	10.5	7.72778	10.1278	7.3	9.7	9.90556	12.6889	12.7167	14.9	19.1778	22.1444
13/4/2006	7.2	8.9	2.6	4.5	9.8	11.6	8.2	10.2	7.71667	9.27222	7.4	9.3	10.15	11.6889	12.4889	13.8389	18.3222	20.7556
14/4/2006	6.2	9.5	1.7	4.8	8.9	12	7.9	10.5	6.96111	9.80556	6.8	9.5	9.36667	12.2444	11.7833	14.3	17.8778	20.7889
15/4/2006	6.5	7.9	1.8	2.5	9.1	10.5	7.6	9.3	7.33889	9.01667	6.8	8.2	8.91667	12.05	11.9333	13.7	18.3	19.7556
16/4/2006	7.2	6.8	2.3	1.2	9.9	9.4	8.3	8.1	7.97222	7.27778	7.4	6.7	10.2778	9.95556	12.5667	11.9278	19.0556	17.8
17/4/2006	7.4	7	2.7	1.7	10	9.6	8.6	8.3	7.62778	7.37778	7.7	7.2	10.3222	9.82222	12.6667	12.0833	19.2	18
18/4/2006	7.7	7.7	2.9	3.1	10.4	10.5	8.9	9	7.68889	8.25	7.4	8	10.4833	10.5056	12.3667	12.7722	18.0333	18.9556
19/4/2006	7	7.3	1.8	2.2	9.6	9.8	8.4	8.6	7.23333	7.98889	7	7.5	9.95	10.5556	11.55	13.2833	16.7222	19.4556
20/4/2006	6.5	6.4	1.3	1.3	8.9	9.1	7.1	7.9	6.66667	6.98333	6.3	6.7	9.35556	9.94444	11.2778	12.0056	16.9889	18.3889
21/4/2006	7.3	6.6	3	0.5	9.9	9	7.9	7.6	7.43333	6.43889	7.6	5.9	10.2111	9.32778	12.5278	10.9889	18.8667	16.8444
22/4/2006	7.8	6.3	3.3	0.7	10.9	8.8	8.7	6.9	8.71111	6.7	8.1	6.3	10.8778	9.87222	12.55	12.35	18.5889	18.3
23/4/2006	8.5	7	3.7	1.6	11.5	9.4	9.3	7.5	9.51667	7.16667	8.7	6.9	11.7167	10.0833	13.6389	12.6889	19.7333	19.2889
24/4/2006	8.4	8	3.8	3.2	11.4	10.3	9.3	8.3	8.98333	8.48889	8.6	8.3	11.9111	11.3167	13.6722	13.5556	20	20.1889
25/4/2006	8.4	7.6	3.6	2.7	11.4	10.1	9.6	8.3	8.72222	8.11667	8.2	7.9	11.6222	10.6222	13.1778	13.9944	19.5667	20.6667
26/4/2006	8.2	8.2	2.9	3.8	10.8	10.8	8.6	8.7	8.71111	9.07778	8	8.4	11.3	11.7333	13.3889	14.2611	19.8778	20.8222
27/4/2006	9.6	9.2	4.8	4.3	12.3	11.8	10	9.8	9.9	9.75	9.3	9.2	12.5167	12.5889	13.6444	14.7889	19.9111	21.3
28/4/2006	10	9.5	5.2	5	13	12.1	10.8	9.6	10.4333	9.64444	9.7	9.9	12.7722	12.6611	14.2222	14.7667	20.4556	21.3889
29/4/2006	10.3	10.5	5.4	5.9	13.3	13.1	10.9	10.3	10.9111	10.8167	10.4	10.7	13.0889	13.2111	15.2278	#N/A	21.9667	22.8444
30/4/2006	10.2	10.8	5.2	5.8	13	13.4	10.5	10.9	10.9944	11.3667	10.1	10.9	13.4333	13.7056	15.6	#N/A	22.2556	24.1333
1/5/2006	9.6	11.3	5	6.4	12.7	14.1	10.3	11.6	10.2944	11.3611	9.6	11.1	12.7889	13.7389	14.9222	16.8833	21.8	24.0889
2/5/2006	10	11	5.7	5.8	13.4	13.9	10.5	11.3	11.1111	11.4611	10.3	11.1	13.8333	13.9111	15.6833	17.1722	22.6889	23.9333
3/5/2006	10.7	11	6.6	5.9	14	14	11.7	11.1	11.3389	11.5556	10.9	10.9	13.9944	14.0611	14.8056	16.3556	21.3778	22.7556
4/5/2006	11.9	11.4	7.3	6.6	15.3	14.3	12.4	12.1	12.1333	11.5222	11.6	10.9	14.2667	13.8167	15.3556	16.05	22.0667	22.9
5/5/2006	12.1	10.7	7.2	5.4	15.3	13.5	12.5	11.4	12.1389	11.6167	11.5	10.9	14.7056	14.3389	16.2111	16.4611	23.5667	22.6222
6/5/2006	12.1	10.5	7.3	5.9	15	13.3	12.7	11.1	12.6278	11.0056	12.1	10.4	14.8611	13.8722	16.3833	16.0111	23.4333	22.3111
7/5/2006	12.6	10.8	7.8	6.4	15.2	13.4	13.4	11.5	13.1278	11.0278	12.2	10.7	15.1389	14.3333	17.2667	15.6611	24.6444	22.0667
8/5/2006	12.5	10.9	8.2	6.2	15.6	13.5	13.9	11.8	12.7889	11.5667	12	10.6	15.0444	14.7111	17.7556	16.3722	25.1333	22.5778
9/5/2006	12.5	10.9	9.1	5.4	16.3	13.5	13.8	11.3	12.8611	11.3833	12.6	10.6	15.2278	14.5222	17.6056	16.6944	24.7889	22.7222
10/5/2006	13.6	10.4	9.4	5.4	16.7	13.5	15.2	11.2	13.7944	10.75	13.5	10.2	16.1778	13.8611	18.1278	15.6167	25.2778	21.6222
11/5/2006	11.6	11.4	6.5	6.3	14.1	14.1	12.6	11.4	12.75	11.0833	11.7	10.7	16.1111	13.65	18.0833	15.8667	25.0556	22.2333
12/5/2006	10.1	11.9	4.9	6.3	12.9	14.8	11.5	11.9	11.55	11.5	10.2	11	14.0667	13.8889	16.2111	16.2722	21.6778	23.2222
13/5/2006	10.3	12.3	5.6	7.4	12.8	15.3	11.3	12.9	11.2667	12.5222	10.5	11.9	13.95	15.1944	15.6333	16.9278	21.5222	24.1889
14/5/2006	11.3	12	6.7	6.7	13.8	14.8	12.1	12.7	12.0167	12.6667	11.5	11.8	15.15	15.3667	16.5389	17.2556	22.4444	23.7222
15/5/2006	11.7	12.1	7.1	6.7	14.8	15	12.7	12.7	12.3667	12.4111	11.6	11.7	14.9444	15.2056	17.0611	16.9222	23.4667	23.2444
16/5/2006	11.3	13.2	6.6	8.4	14.1	16.1	12.6	13.2	11.5944	13.0778	11.1	12.7	15.0778	16.0389	16.8222	17.8	23.4	24.6667
17/5/2006	10.9	14.8	6	10.5	13.5	18.1	12	14.9	11.85	14.7944	10.6	14.6	14.7944	17.0778	16.5222	18.4389	22.6778	25.4111
18/5/2006	11.5	15.3	6.5	11.5	14.4	18.3	12.2	15.9	12.2722	15.7667	11.1	15.2	15.1444	17.65	16.6167	19.5889	23.3667	26.6556
19/5/2006	13	14.3	8.5	10.4	16	17.3	13.5	15.7	13.4611	15.0444	12.8	14	16.4833	17.2833	17.7944	19.3167	24.2667	26.3
20/5/2006	13.6	15.1	9.3	11.1	16.5	18.1	14.3	15.8	14.3278	15.35	13.4	14.6	17.1889	17.7222	18.6111	19.1444	25.8556	26.7111
21/5/2006	12.7	15.2	8	11	15.5	18.2	13.3	16.3	13.1611	15.8611	12.4	15.1	16.0444	18.2167	17.7556	19.6556	24.5333	26.6667
22/5/2006	13.4	15	8.9	10.7	16.1	17.9	14.4	15.9	13.4	15.3778	12.9	14.5	15.6889	18.2333	17.3333	19.1667	24.3556	26.0222
23/5/2006	13.6	15.5	8.8	11.1	16.2	18.8	14	16.2	13.8611	15.9111	13.1	14.8	16.55	18.5278	18.2056	19.3444	24.9111	26.6556
24/5/2006	13.6	15	8.4	10.3	16.3	18.1	14	16.3	13.5611	15.7556	12.7	14.5	16.3889	18.1722	17.75	19.0944	24.6667	25.8
25/5/2006	14.5	13.7	9.9	8.6	17.3	16.6	14.5	15.1	14.65	14.4722	13.8	13.5	16.8889	16.8667	17.8444	18.0222	25.0111	24.1111
26/5/2006	14.7	13.5	10	8.7	17.5	16.5	15.1	14.6	15.05	14.0889	13.9	13.4	17.3944	17.0222	18.2444	18.3611	25.2778	24.7889
27/5/2006	14.2	14.3	8.9	10.1	17	17.6	15.2	15.2	14.5278	14.9333	13.1	14.5	17.3222	17.9889	17.8556	19.2667	24.6778	26.0222
28/5/2006	13.3	15.8	8	11.3	16.3	18.4	14.3	16.4	14.1333	15.8556	12.8	15.4	17.2389	18.9944	17.9944	20.0167	24.4778	27.2
29/5/2006	13.2	15.5	7.6	10.4	15.8	17.9	14.1	16.3	14.1833	15.2444	12.7	14.7	16.6111	17.6056	17.5278	19.3056	24.0222	26.3333
30/5/2006	13.2	15.3	7.7	10.1	15.6	17.9	13.3	15.7	13.8611	15.1222	12.5	14.3	16.8056	17.9222	18.1667	#N/A	24.8333	25.5556
1/6/2006	11.5	15.1	5.8	10.2	14	18.1	11.5	15.7	12.3222	15.0889	10.9	14.5	16.0667	17.4778	17.8944	18.3167	24.5889	24.5
2/6/2006	11.9	15.1	6.5	10	14.6	18.1	11.9	15.4	12.3278	15.3611	11.5	14.4	15.5944	18.1333	17.0944	19.1111	23.7778	25.7222
3/6/2006	13	14.6	7.9	9.8	15.5	17.7	13	15.1	13.1444	15.0889	12.3	14.3	16.1056	18.2222	16.7222	19.5056	23.2222	26.1222
4/6/2006	13.7	15.1	9	10.8	16.4	18.1	13.4	15.4	13.4056	15.3556	12.6	14.5	16	18.8556	17.0167	19.7111	24.1444	26.2667
5/6/2006	13.8	17	9.1	12.7	16.6	19.8	13.9	17	14.0111	16.6444	13.1	16.2	16.3333	19.6556	17.4611	20.6333	24.4	27.4667
6/6/2006	13.2	18.2	8.3	13.8	15.6	20.8	13.3	18	13.5722	17.4	12.6	17.3	16.2111	20.2833	17.7667	21.1889	24.1111	28.0556
7/6/2006	13.2	18.3	8.5	14.2	15.9	20.8	13	18.3	13.6056	17.8667	12.5	17.3	16.4444	20.2056	17.9167	21.2389	24.7	28.2111
8/6/2006	13	17.4	8.3	13.6	15.9	20.2	13.4	18.2	13.65	17.7722	12.4	16.9	16.6722	20.5222	18.0833	21.4056	24.8	28.6889
9/6/2006	14.4	17.1	9.7	12.7	16.8	19.9	13.8	18	14.3444	16.8333	13.3	16.5	16.7611	20.0389	18.3278	20.7333	24.7444	27.1778
10/6/2006	14.9	17.5	10.7	13.1	17.5	20.2	14.4	18.4	15.0056	16.7722	14.1	16.5	17.8778	19.8389	19.3778	20.5056	26.3778	27.0333
11/6/2006	14.1	17.9	9.5	13.9	16.5	20.8	14.3	18.5	14.1722	17.6833	13.5	17.2	17.6167	20.5833	18.9	21.05	25.5222	27.6556
12/6/2006	15	18.1	9.9	14.4	17.4	20.8	14.6	18.6	14.5833	17.7889	14	17.6	17.6556	21.1056	18.4	21.6778	25.1889	28.2889
13/6/2006	16	18.7	11.4	15	18.2	21.5	15.9	19.7	15.8444	17.5333	14.6	17.8	18.7111	20.85	19.8611	21.3833	26.5667	28.0444
14/6/2006	16	20.7	11.4	16.8	18.3	23.4	15.7	21.1	16.15	19.0667	14.8	19.1	18.9833	21.4667	20.0833	21.5667	27.3	28.1889
15/6/2006	16.2	20.7	12.1	16.3	18.7	24.1	15.9	21.7	16.6722	19.3722	15.3	19.2	19.5944	21.3611	20.4389	21.4389	27.9667	28.2222
16/6/2006	17.5	20.1	13.8	15.5	20	23.7	17.1	21.5	17.6278	19.15	16.1	18.7	20.2778	21.2778	21.0444	21.4389	28.0889	28.3222
17/6/2006	17.3	20.2	13.3	15.8	19.7	24	17.2	21.9	18	19.25	16.3	19.1	20.4944	21.7333	21.4389	22	28.4	28.9333
18/6/2006	15.7	20.3	11.4	16	18.2	23.8	15.9	21.7	16.7222	19.6722	15.5	19.1	20.0444	22.0222	20.75	22.3944	27.5111	29.2778
19/6/2006	16	19	11.4	14.5	18.4	22.2	16	21	16.2889	19.15	15.2	18.4	19.4833	21.9556	20.3778	22.5167	27.4222	29.3667
20/6/2006	17.6	17.3	13.6	13	20.3	20.7	17.1	19.9	17.3611	17.5667	16.3	16.6	19.9444	21.2278	20.8722	21.9333	27.8889	28.5111
21/6/2006	19.6	17.6	15.7	13.1	22	20.9	18.8	19.5	18.9889	17.3611	18	16.7	21.1	20.5889	22.1611	21.4778	29.3778	27.5889
22/6/2006	20	17.6	16.1	13.2	22.7	21	20.2	19.6	19.3056	17.35	18.6	16.7	21.5611	21.0444	22.5111	21.9889	29.8222	28.6556
23/6/2006	19.7	17.7	15.8	13.6	22.5	20.9	19.7	19.3	18.9222	17.6778	18.1	16.9	21.4611	21.2278	22.35	22.0833	29.2444	28.2222
24/6/2006	19.4	19.7	15.4	15.8	21.9	22.6	19.7	20.4	18.9444	18.9611	18.1	18.7	21.6	22.2722	22.4611	22.5833	29.3889	29.1222
25/6/2006	19.9	19.6	15.6	15.7	22.3	22.8	19.9	20.5	18.9778	19.5444	18.3	18.5	21.5611	22.8333	22.4722	23.7778	29.1778	30.6778
26/6/2006	20.6	17.7	16.4	13.4	23.4	20.7	20.7	19	19.3333	18.15	19	17.3	21.4333	21.6444	22.2889	22.5667	29.3778	29.2444
27/6/2006	20.8	16.4	16.9	12.1	23.7	19.5	21	18.1	20.1222	16.5944	19.5	16.1	22.5722	20.4	23.2944	21.6	30.1556	27.9778
28/6/2006	20.3	17	16	12.6	23.2	19.9	20.9	18.3	19.8389	16.5278	19.2	16.3	22.6111	20.1556	23.3722	21.3167	30.2444	27.8556
29/6/2006	19.8	18.2	16	14	23	21.4	21.2	19	19.8444	17.0667	19	16.8	22.7333	20.4722	23.3278	#N/A	29.8889	28.7222
30/6/2006	18.8	17.7	14.8	13.5	21.7	20.6	20.2	18.7	19.2056	17.4167	18.2	16.8	22.4611	21.4056	23.2056	#N/A	29.6333	29.6556
1/7/2006	18.9	17.8	15.2	13.3	22.1	20.3	20.2	18.2	18.9389	17.5722	18.4	16.7	22.2167	21.2222	22.5833	22.4889	29.1444	29.0667
2/7/2006	20.4	17.8	16.7	14.2	23.7	20.4	20.9	18.9	20.0278	18.4889	19.5	17.5	22.6611	21.8278	23.0056	22.9	29.6444	29.5333
3/7/2006	21.3	18.5	17.6	14.9	24.4	21.5	22	19.1	20.6778	18.6278	20.1	17.9	23.8333	21.9	24.2167	22.8944	31.0778	29.3667
4/7/2006	21.4	19.3	17.5	15.6	24.3	21.9	22.4	19.6	21.25	18.8444	20.2	18.1	24.3944	21.95	24.9278	23.2556	31.8667	30.1111
5/7/2006	20.4	18.5	16.1	14.7	23.4	21.4	21	19.2	20.2389	18.2444	19.5	17.5	23.5889	21.6556	24.4278	23.1056	31.0778	29.9778
6/7/2006	20.4	19.1	16.6	15.3	23.4	21.8	21	19.5	20.0167	18.6833	19.2	17.6	22.9778	21.7667	23.8444	23.15	30.8	29.9444
7/7/2006	21.2	19.4	17.6	15.8	23.9	22.2	22.1	20.1	20.9222	18.7889	20	18.1	23.8167	22.1889	24.5333	23.1444	31.5778	29.9222
8/7/2006	22.1	20.3	18.3	16.9	24.7	23.1	22.8	20.9	21.3222	19.5944	20.8	19	24.0611	22.2611	24.4889	23.2944	31.2333	30.2
9/7/2006	21.6	20.7	17.9	17.2	24.7	23.5	22.9	21.5	21.2	19.95	20.5	19.6	24.2111	22.7389	24.5611	23.6111	31.1556	30.3889
10/7/2006	21	20.8	17.3	17.2	23.9	23.4	22.1	21.6	20.8389	19.9556	20.2	19.4	24.0444	22.8278	24.1833	23.9389	30.7111	30.7556
11/7/2006	20.7	21	16.8	17.4	23.8	23.8	22.1	21.8	20.3611	20.0556	19.8	19.6	23.6833	22.7389	24.0333	24	30.3333	31.0556
12/7/2006	21	21.4	17.4	18	24	24.1	22.5	21.9	20.7778	20.5556	20.2	19.9	23.7056	23.2444	23.8833	23.9778	30.4222	31.2556
13/7/2006	21.2	21.7	17.5	18.1	24.1	24.4	22.5	21.9	21.0278	21.2722	20.1	20.4	23.9611	24.0111	24.2556	24.6	30.9	31.5556
14/7/2006	21.4	21	17.5	17.2	23.9	23.6	22.6	21.6	20.6889	20.8333	19.9	19.7	23.8333	24.0611	24.3389	25	30.9667	32.2222
15/7/2006	22.4	21	18.6	17.7	25.2	24	23.2	21.8	21.0556	20.6778	20.7	20.2	23.7556	23.7833	24.15	24.6056	31.1667	31.7667
16/7/2006	23.4	20.3	19.8	16.9	26	23	24.3	21.6	21.7167	20.4	21.5	19.7	24.2556	23.9222	24.4611	24.6667	31.4222	31.7667
17/7/2006	23.6	20.7	20	17.7	26.5	23.3	24.5	22	22.5667	20.5833	21.9	20	24.8556	23.8778	24.8556	24.2611	31.9	31.7
18/7/2006	23.6	21.1	20.1	17.9	26.2	23.8	24.4	22	22.9722	20.8333	22.1	20.2	25.2222	24.1944	25.4222	24.3389	32.2889	31.3444
19/7/2006	21.3	20	17.8	16.7	24.5	22.9	23	21	21.6444	20.6444	20.8	19.5	24.8722	23.7056	25.5833	23.9889	32.2	30.8333
20/7/2006	20.9	20.8	17.5	17.2	24.3	23.4	23.1	21.7	20.9056	21.1333	20.4	19.8	24.1056	24.2389	24.4111	24.7111	30.8889	31.3333
21/7/2006	21.9	21.1	18.7	17.7	25	23.9	23.7	22	21.1833	21.8278	20.6	20.6	24.1722	24.6222	24.2333	25.2833	30.9778	32.2111
22/7/2006	22.3	21	19.2	17.5	25.5	23.8	24	21.7	21.6667	21.5778	21.1	20.1	24.3944	24.8722	24.95	25.5889	32.0222	32.4444
23/7/2006	22.1	20.1	18.7	16.5	25.4	22.8	23.7	21.2	21.5389	21.0111	21	19.8	24.5444	25.2167	25.05	25.2778	32.1778	32.1444
24/7/2006	23.1	20.1	19.6	17	26	22.9	24.6	21.4	22.3389	21.2889	21.5	19.6	25.3167	24.5833	25.1111	24.7611	32.2	31.7
25/7/2006	21.7	20.6	18	17.7	24.4	23.1	23.5	21.2	21.85	21.2556	20.8	19.8	25.1944	24.95	25.2	25.0833	31.9444	31.6556
26/7/2006	19.9	20.2	16.1	17.4	22.7	22.7	22.1	21.1	20.4389	21.4611	19.5	19.5	23.9222	25	24.6333	25.7	30.9	32.6
27/7/2006	19.9	19.8	16.3	17.1	23.1	22.6	22	20.8	20.3556	20.9222	19.5	19.4	23.3722	25.0333	23.8556	26.0278	30.4333	32.8444
28/7/2006	20.1	19.4	16.5	17	23.1	22	21.6	20.5	20.7222	20.4167	19.5	19.3	23.8167	24.3444	24.1667	25.4111	30.9778	32.1778
29/7/2006	19.8	20.1	16.1	17.5	22.8	22.6	21.4	21.1	20.8611	20.6611	19.3	19.5	24.0278	24.4167	24.5222	24.95	31.1778	31.2111
30/7/2006	19.1	20.6	15.7	18	22	22.9	20.8	21.3	20.2167	20.3611	18.7	19.6	23.6278	24.0167	24.0444	#N/A	30.5667	30.9222
1/8/2006	19.5	21.9	16.5	19	22.7	24.5	20.7	22.4	20.6889	21.9389	19.1	20.7	23.7333	24.8111	24.2278	24.7556	30.9889	31.5333
2/8/2006	19.5	21.4	16.9	18.5	22.1	24.1	20.6	22.2	20.4	21.9389	19.2	20.6	23.9278	25.2222	24.7056	25.2722	31.7778	32.2667
3/8/2006	19.3	22	17	19.2	22	24.8	20.9	22.7	19.9056	22.2111	18.9	21	23.4056	25.1889	24.1722	25.1778	30.8667	32.1111
4/8/2006	19.5	21.8	17.3	19	22.5	24.7	21	22.2	19.7778	21.9278	19.2	20.8	23.1778	25.2778	23.6556	25.7333	30.1111	32.6444
5/8/2006	19.7	21.7	17.4	19.4	22.2	25.1	20.8	22.7	19.8889	22.0389	19.1	21.1	23.0889	25.1278	23.55	25.9667	30.4333	33.1222
6/8/2006	20.2	22.5	17.6	20.1	22.9	25.6	21.1	23.1	20.1778	22.4667	19.6	21.7	23.1667	25.5944	23.35	26.0278	30.1667	33.2
7/8/2006	20.5	22	18.2	19.5	23.2	25.1	21.3	23	20.7556	22.1889	19.8	21.2	23.7722	25.7389	23.8833	25.95	31.2	33.3889
8/8/2006	20.9	21.1	18.6	18	24.1	24.2	21.8	22.6	21.5611	20.9556	20.5	20.2	24.4611	24.8889	24.2611	24.7389	31.4111	31.5222
9/8/2006	20.4	21.9	17.4	18.8	23.4	25.2	21.3	22.9	21.2444	21.4056	19.6	20.9	24.2222	24.7611	24.9833	24.4556	32.1333	30.9333
10/8/2006	19.5	22.5	16.5	19.1	22.3	25.6	20.6	23.3	20.4722	22.0056	19.1	21.2	23.5944	24.9056	24.2722	24.85	31.2111	31.7222
11/8/2006	19.3	22.3	15.9	19.3	21.9	25.5	20.3	23.1	20.0056	22.1278	18.7	21.1	23.1111	25.4111	23.4167	25.6167	30.0889	32.5778
12/8/2006	19	22.6	15.6	20.2	21.8	25.7	19.8	23.1	19.5222	23.1611	18.3	21.6	22.8556	26.2222	23.4667	26.1778	30.8444	33.2667
13/8/2006	19.1	23	15.7	20.2	21.8	26.4	19.7	23.6	19.5778	23.5167	18.2	21.7	22.6389	26.2389	23.6778	26.5667	30.7667	33.9889
14/8/2006	19.3	22.3	15.7	19.7	21.9	25.6	20	23.4	19.1778	23.2278	18.2	21.4	22.6111	26.2444	23.2	26.4111	29.9778	33.7111
15/8/2006	18.4	23.2	15.4	20.3	21.5	26.2	19.7	23.7	19.2	23.2889	17.9	21.8	22.7167	26.4056	23.0278	26.2333	29.6889	33.5889
16/8/2006	18	22.7	14.2	20.2	20.7	25.6	19	23.1	18.7833	22.9333	17.4	21.5	22.0333	26.3111	22.5278	25.7389	29.0667	32.8
17/8/2006	17.8	21.2	14.6	19.4	20.9	24.4	18.8	22.5	18.3222	22.4444	17.5	20.8	21.2833	25.7556	22.6278	25.5667	29.6333	32.8556
18/8/2006	18.1	21.5	15.5	19.2	21.2	24.7	18.7	23	18.4778	22.0611	17.7	20.8	21.6278	25.6611	23.0278	25.7111	30.2444	32.4667
19/8/2006	18.2	22.3	15.5	19.2	21.1	25	18.9	22.9	18.3833	22.05	17.6	21	21.9167	25.5944	22.9278	25.8056	29.6333	32.9111
20/8/2006	18.1	21.8	15.1	19.4	21.1	25	18.8	22.7	18.3056	22.3056	17.2	21.2	21.6056	25.8444	23.0833	26	30.1889	33.1556
21/8/2006	17.2	20.6	14.1	18	20.1	23.8	18	21.8	17.8611	21.9389	16.8	20.4	21.2889	25.2667	22.7111	26	30	32.9333
22/8/2006	17.5	19.1	15	16.7	20.6	22.5	17.9	20.9	17.8556	20.4111	16.9	19.3	21.4222	24.4333	22.3278	25.1333	29.3333	31.7889
23/8/2006	18.4	18.9	15.6	16.4	21.2	22.7	18.5	20.7	18.6667	19.4222	17.4	18.5	21.8278	23.5056	22.8	23.9444	29.9222	30.1667
24/8/2006	19	18.8	16	16.2	21.8	22.7	19.1	20.6	19.1944	19.3444	18.1	18.2	22.3722	22.8889	23.0111	22.9389	30	28.9667
25/8/2006	18.3	19.3	15.7	16.8	21.1	22.8	18.5	20.7	19.1	19.2944	17.7	18.7	22.4111	22.6611	23.05	23.0278	29.8333	29.3111
26/8/2006	18.2	19.8	15.8	17.6	20.9	23.4	18.5	21	18.5778	19.7444	17.6	19	21.6167	23.3	22.0611	23.3944	28.6556	30.3667
27/8/2006	18.4	20.9	15.9	18.7	21.2	24.4	18.6	21.7	19.0056	20.4889	17.9	19.6	21.8389	23.6722	22.7278	23.8111	29.9222	30.8444
28/8/2006	17.1	21	14.5	18.5	19.9	24.8	17.8	21.8	18.3	20.9778	16.9	19.7	21.95	24.0556	23.1833	23.9333	30.3333	30.8778
29/8/2006	17	21.4	14.7	18.1	20.3	24.3	17.6	21.6	17.0778	20.8778	16.2	20.1	20.7778	24.1	21.7889	23.85	29.1222	30.9111
30/8/2006	18.4	20.2	16.5	16.9	21.5	23.2	18.5	21	18.2111	20.4611	17.3	19.1	21.2444	23.6833	22.0833	#N/A	29.5111	30.9222
1/9/2006	18.8	19.9	16.4	16.6	21.9	23.2	19	20.9	18.2222	19.6167	17.8	18.7	21.5389	23.2778	22.1556	23.5389	28.9556	30.2333
2/9/2006	20	20	17.5	16.2	23.3	23.2	19.8	20.9	19.5111	19.7	18.7	18.6	22.2556	22.9	22.5278	23.3556	29.6222	29.8333
3/9/2006	19.8	20.5	17.4	16.5	22.5	24.2	20	21.1	19.65	19.95	18.8	19.2	22.9778	23.75	22.8722	23.75	30.1778	30.4667
4/9/2006	19.6	20	17.2	16.1	22.6	23.4	19.7	20.6	19.6333	19.6167	18.6	19.1	23.1278	23.0167	23.3	23.35	30.3222	30.3222
5/9/2006	19.4	19.7	16.8	16.4	22.5	23	19.4	20.5	19.1222	19.1389	18.3	18.3	23.0444	22.95	23.1444	23.2278	30.1556	30.2667
6/9/2006	18.8	19.6	15.9	16.2	21.9	22.7	18.9	20.3	19.4056	18.6611	18	18	22.7444	22.2722	23.1389	22.7222	30.0111	29.6222
7/9/2006	18.5	19.8	15.6	16.7	21.3	22.7	18.8	20.4	18.3222	18.6722	17.4	18.5	22.3389	22.4444	22.5722	23.2389	29.3222	30.3333
8/9/2006	18.2	20	15.4	16.8	21.2	23	18.8	20.8	18.1056	19.15	17.3	19.2	21.8556	22.8111	22.3278	23.3111	29.2444	30.0556
9/9/2006	17.8	19.4	15.5	16.1	21.2	22.3	18.8	20.5	17.5056	19.0444	17.4	18.3	21.5	22.9389	21.8722	23.2889	28.3667	30.7444
10/9/2006	19.1	18.9	16.2	15.1	22.4	21.9	19.4	19.9	18.05	18.5167	18	17.6	21.7278	22.5611	21.95	22.8556	28.5556	29.5111
11/9/2006	18.9	18.9	15.3	15	22.1	22.3	19.6	19.7	18.5056	18.7167	17.6	18	22.2833	22.4833	22.7222	23.15	29.4333	29.8111
12/9/2006	17.6	19.6	13.6	15.8	20.7	22.9	18.8	20.3	17.7333	19.2778	16.7	18.8	21.7722	23.4	22.1833	23.7944	28.7444	30.6778
13/9/2006	17.3	20.2	13.2	16.1	19.9	22.9	18.1	20.9	17.3222	20.0889	16.2	19	21.2333	23.6111	21.6722	24.2167	28.5444	31.3667
14/9/2006	16.4	18.2	12.6	13.9	19.3	21	17	19.5	16.0556	19.0167	15.6	17.3	20.3222	22.7944	21.15	23.7889	27.8556	30.7333
15/9/2006	16	17.1	11.7	12.4	19.1	20.1	16.3	18	16.0889	17.9278	15.2	16.6	19.7278	22.1556	21.3611	23	27.9889	29.9889
16/9/2006	15.2	16.6	11	12.4	18.4	19.5	16.1	17.7	15.45	16.7778	15	16.1	19.5667	21.1	21.3722	21.7167	27.8333	28.2778
17/9/2006	14.8	17.6	11.6	13.4	17.9	20.3	15.5	18.1	14.6333	17.1611	14.5	16.3	18.8611	20.8667	20.1722	21.6611	26.8333	28.2778
18/9/2006	16	17.6	13.1	13.5	19	20.2	16.4	18.5	15.7944	17.0167	15.4	16.1	19.1667	20.0778	20.6722	21.1889	27.9667	27.6222
19/9/2006	15.6	17.4	12	13.7	18.3	20.3	16.1	17.5	15.6222	17.1056	14.8	16.1	19.5778	20.85	20.3944	20.5667	27.2556	27.1
20/9/2006	14.7	18	11.3	14.3	17.9	20.7	15.3	18	14.9167	17.65	14.2	16.6	19.2667	21.4111	19.6556	21.2778	26.3889	28.0333
21/9/2006	14.7	17.3	11.1	12.8	18	20.1	14.9	17.6	14.9167	17.1167	14.2	16.2	18.8722	20.9222	19.3722	21.3222	25.7778	27.9111
22/9/2006	15.9	16.7	11.8	12.3	18.7	19.3	15.6	17.1	15.2889	16.6056	14.8	15.6	19.1167	20.3056	19.9333	20.8778	26.4667	27.0778
23/9/2006	16.8	16.7	13.5	13.2	19.5	19.5	15.9	17.4	15.2111	16.4889	15.2	15.8	19.1778	20.0056	19.8833	20.8167	26.6889	27.2667
24/9/2006	16.3	17.6	13	14.5	18.9	20.6	16	18	15.8222	16.7333	15.2	16.2	19.5167	20.4778	20.4111	20.9889	27.5111	27.5556
25/9/2006	15.8	18	12.4	14.5	18.4	20.9	15.9	18.3	15.3333	16.9056	14.8	16.6	19.0444	20.4611	19.7944	20.7833	26.5889	27.7667
26/9/2006	16.3	17.1	13.2	13.3	18.8	19.7	16.3	18	15.0444	16.1056	15.2	16	18.8778	19.5833	19.4556	20.0944	26.0556	27.1444
27/9/2006	15.7	16.5	11.8	12.7	18.3	19.2	15.9	17.8	15.0389	15.7333	14.4	15.5	18.9333	19.3444	19.4611	19.4722	26.1889	25.7667
28/9/2006	14.5	15.4	9.8	10.7	17.1	18.2	14.4	16.5	14.3722	14.3333	13.1	14.2	18.3111	18.2278	19.1778	19.1167	25.9111	26.0111
29/9/2006	13.6	14.6	8.9	9.8	16.1	17.3	13.7	15.6	13.4278	13.45	12.3	13.1	17.2778	17.6667	18.2556	#N/A	24.3	24.8667
30/9/2006	13.6	13.9	8.8	9.8	16.4	16.7	13.8	14.9	13.5556	13.9111	12.8	13.7	16.7833	17.55	17.8556	#N/A	23.6889	24.1111
1/10/2006	14.4	14.1	9.9	9.5	17.1	16.7	14.5	14.7	14.0778	14.4056	13.2	13.4	17.5556	17.9	18.5167	19.0167	24.8333	24.7778
2/10/2006	13.9	14.6	9.3	9.8	16.4	16.9	14.3	14.7	14.2056	14.0222	13.2	13.6	18.0611	17.2556	19.1111	18.5722	25.6	24.6222
3/10/2006	14.2	14.8	9.9	10	16.6	17	14.2	15	14.0889	14.0389	13.4	13.7	17.8333	17.6056	19.0944	18.9222	25.5111	25.2556
4/10/2006	13.7	14.9	8.8	10	16.1	17.1	13.7	14.9	14.0167	14.3111	12.7	13.7	17.4167	17.7778	19.0056	19.1	25.2333	25.3667
5/10/2006	13.4	15	9.3	10.2	16.3	17.8	13.4	15	13.8944	14.1111	12.9	13.8	17.25	17.7	18.6389	18.5556	24.7444	24.5222
6/10/2006	13.3	14.4	8.8	9.9	15.7	16.9	12.8	14.5	13.2833	13.4278	12.8	13.1	16.8889	17.2167	18.7167	17.9222	25.2889	24.5778
7/10/2006	12.3	14	8	9.2	14.7	16.6	12.4	14.3	11.9556	13.2111	11.7	12.5	15.6333	16.8222	17.8056	17.4611	24.0111	23.7556
8/10/2006	11.8	13.3	7	8.2	14.4	16.1	11.8	13.8	11.35	12.7556	10.9	11.9	14.9	16.5278	16.9444	17.3556	23.2	23.4667
9/10/2006	10.9	13.4	6.8	8.8	13.8	16.4	10.8	13.8	10.9611	12.4333	10.6	12.2	14.3556	15.7333	16.75	16.9833	23.2111	23.1222
10/10/2006	12	13.4	8.4	9.2	14.2	16	11.8	13.7	11.7278	12.6667	11.7	12.3	15.15	15.7	17.25	17.2611	23.8889	23.1222
11/10/2006	12.7	13.2	7.9	9	15.1	15.9	12.2	13.9	12.5333	12.4722	11.6	12.2	15.6611	15.6667	17.5222	17.2611	24.0333	23.4778
12/10/2006	12.2	11.8	7.2	7.7	14.5	14.8	11.7	12.7	12.2056	11.0167	11.1	10.8	15.6611	14.2944	17.6	16.3444	23.4778	23.1222
13/10/2006	11.4	12.1	6.6	7.8	13.9	14.5	11.4	12.6	12.0389	11.7111	10.9	11.1	15.1056	14.3889	17.0278	16.6111	23.2444	22.5889
14/10/2006	9.5	11.5	5.5	8	12.2	14	9.7	12.3	10.95	11.2167	9.3	10.8	13.8278	14.5889	16.4556	16.6111	22.3222	22.8556
15/10/2006	11.1	12.9	6.3	8.6	13	15.1	10.2	12.9	11.2611	11.3333	10.6	11.4	14.3444	14.4222	16.5611	16.0444	22.4778	22.3889
16/10/2006	11	13.8	6.4	9.6	13.1	16	10.8	13.3	11.6556	12.7111	10.4	12.4	14.6167	15.6889	16.3556	17	22.4556	23.4889
17/10/2006	11.2	13.5	6.4	9.7	13.5	16.3	10.7	13.5	11.3722	12.6333	10.5	12.6	14.5611	15.7722	16.5	17.55	22.5	24.0333
18/10/2006	10.8	13.1	5.9	9	12.6	15.7	10.6	13	11.1056	12.0667	10.1	11.7	14.0611	15.4	16.2667	16.9389	22.6222	23.6778
19/10/2006	10.4	13.2	6.1	8.7	12.7	15.7	10.1	13.2	10.3	12.65	9.8	11.6	13.2611	15.2389	15.8056	16.7667	22.6111	23.4444
20/10/2006	10.1	11.7	6.1	7.1	12.4	14.2	10	12.1	9.76667	11.0667	9.5	10.8	12.5056	14.6444	15.4667	16.3167	21.8778	22.1556
21/10/2006	10.9	11.5	6.4	7.4	13.1	13.9	10.9	11.3	10.4778	10.3722	10.2	10	12.7056	13.7667	15.6944	15.6722	21.6444	21.8111
22/10/2006	9.5	11.6	5.5	7.4	12.1	14.5	9.4	12.1	9.04444	10.9222	8.5	10.7	11.9222	14.0333	14.7167	15.9889	21.0778	22.5222
23/10/2006	9.9	11.2	6.2	7	11.9	13.9	9.7	11.5	9.53889	10.9611	9.2	10.3	12.4056	14.2722	15.0778	15.6056	21.2778	21.7889
24/10/2006	9.2	11.1	5	7.2	11.2	14.1	9.1	11.5	8.9	10.2833	8.4	10.1	12.1444	13.9556	14.6667	15.4167	20.4333	21.4
25/10/2006	8.5	10.9	4.4	7.1	10.6	13.5	9	11.2	7.93333	10.1	8	10.5	11.1278	13.6778	13.5333	15.7278	18.9556	21.8556
26/10/2006	7.7	10.9	4.2	6.9	10.2	13.2	8.2	11	7.18889	9.83889	7.4	9.8	10.1389	13.4611	12.9167	15.3778	18.9556	21.6556
27/10/2006	9.6	10	5.6	5.6	11.4	12.4	9	10.5	8.55	9.38333	8.8	9.1	10.9722	13.4278	14.4444	14.5333	20.8444	20.8444
28/10/2006	8.5	8.9	4	4.6	10.1	11.1	8.4	9.5	7.78333	8.22222	7.8	8.1	10.55	12.4444	13.9111	13.7611	20.1889	19.6444
29/10/2006	8.5	8.4	4.2	4.5	10.8	10.9	8.6	9	7.80556	8.14444	8.1	7.8	9.92778	11.1222	13.3556	13.4389	19.5778	19.4111
30/10/2006	8.2	8	3.9	4.4	9.9	9.9	8.2	8.6	8.05	7.6	8.3	7.6	11.3056	11.0056	14.2444	#N/A	20.3111	19.3444
1/11/2006	6.6	8.5	2.6	5	8.5	10.9	6.8	8.9	6.36667	8.15	6.5	7.7	9.11667	11.1167	12.7	13.25	18.9333	18.9444
2/11/2006	7.8	9.1	4.2	4.9	9.7	10.9	7.4	9.4	6.78889	7.96667	7.1	8.1	9.72222	10.95	12.7889	12.9944	19.1333	18.3111
3/11/2006	9.2	9.3	5.1	4.4	11.2	10.9	8.8	9.2	8.27778	8.22222	8.8	7.9	11.0278	11.2167	13.9722	12.9444	20.0444	17.9889
4/11/2006	10.3	8.9	5.6	4.3	11.8	10.7	9.3	8.9	9.66667	8.52222	9.6	8.6	11.2389	10.8333	14.7778	12.8944	21.2111	18.8222
5/11/2006	10	7.7	5.3	2.8	11.5	9.6	9.2	8.5	9.36667	7.3	10.1	7.2	11.1556	10.0889	15.6611	12.4389	22.0222	17.9778
6/11/2006	9.1	6.3	5.7	2.1	10.5	8.4	8.7	7.3	8.66667	6.12778	8.8	5.8	10.5278	8.8	14.5944	11.7667	21.0333	17.1444
7/11/2006	10.1	7.3	5.9	4	11.1	9.2	9.3	7.7	8.99444	6.61667	9.4	7.1	11.2556	8.83889	14.9	12.3	21.3	17.8111
8/11/2006	8.9	7.6	4.8	3.8	10.5	9.1	8.8	8.1	8.73333	6.85	8.5	7.3	10.9611	8.67778	14.5833	12.4333	20.8556	17.8667
9/11/2006	8	6.1	3.6	2.3	9.6	7.8	8.1	6.8	7.87778	5.25556	7.9	5.8	10.2667	7.51111	13.7167	11.3111	19.7333	17.1222
10/11/2006	8.1	6	3.9	2.7	9.1	7.7	7.9	7.2	7.32778	5.36667	7.5	5.4	9.76667	7.51111	13.2222	11.2556	18.9667	17.1444
11/11/2006	7	5.7	2.9	3.1	8.6	7.4	7.4	6.6	6.63333	5.26111	6.6	5.4	9.03889	7.16667	13.0778	11.4278	19.0444	17.3556
12/11/2006	7	6.2	3.1	3	9.2	7.5	7.9	7.2	6.61111	5.87778	7.2	6.1	9.26667	8.31111	13.0167	11.7389	19.3222	17.5111
13/11/2006	8.6	5.3	4.3	2.4	10.4	6.6	8.7	6	7.98889	4.88889	8.3	5.1	9.29444	7.78333	13.6444	11.2222	19.8111	17.2556
14/11/2006	8.4	7.2	2.6	3.6	9.5	8.5	8.5	7.4	7.41667	6.48333	7.5	6.9	10.3444	8.23333	12.7556	11.9333	18.0778	17.9111
15/11/2006	6.3	6.9	1.5	2.6	7.6	8.7	7.1	7	5.84444	7.38889	5.7	6.9	8.95556	9.45	11.65	11.9278	16.6111	17.6556
16/11/2006	8.1	4.8	3.3	0.4	9.7	6.9	8.1	5.9	7.42222	5.60556	7.5	5	9.31667	7.8	12.2111	10.9444	17.8889	15.9111
17/11/2006	7	5.1	2.6	0.8	9.2	6.7	7.6	5.4	7.17222	5.61111	7	5.1	9.59444	7.85	12.5722	10.9444	17.8444	15.7111
18/11/2006	6	6.5	1.4	3.2	8.3	7.9	6.8	6.7	5.93333	6.25556	5.5	6.5	8.17778	8.25556	11.3833	11.0167	16.9444	16.8222
19/11/2006	6.8	6	1.9	2.3	8.6	7.1	7	6.4	6.5	5.74444	6.5	5.6	8.90556	8.02222	12.25	11.3333	17.8556	17.1222
20/11/2006	7.4	5.1	3.3	1.1	8.8	6.8	7.3	5.8	6.7	4.8	6.7	5	8.55	7.36111	12.8722	10.7611	18.7	16.3667
21/11/2006	6.4	5.6	1.9	1.5	7.7	7.2	6.7	5.3	6.3	5.33333	6.2	5.7	8.91667	7.65	12.5389	10.7833	17.7111	16.3
22/11/2006	3.9	4.9	0.6	1.1	5.9	6.4	4.8	5.5	4.23889	4.51111	4.2	4.8	6.12222	6.08333	10.1667	10.0222	15.4111	15.3778
23/11/2006	3.2	4.1	1.3	0.2	5	6.1	3.9	4.8	3.55	3.77778	3.9	4.1	5.16667	5.88333	9.9	10.0444	15.9889	15.1111
24/11/2006	4.5	4.7	2.7	1.6	5.6	6	4.7	5.1	4.09444	4.18333	5	4.8	5.77222	5.56111	10.5944	10.2278	16.8556	15.3889
25/11/2006	5.7	4.2	2.9	0.6	7.5	5.8	5.6	4.9	5.51111	3.8	5.8	3.7	6.60556	5.65556	11.2778	9.46667	17.0556	14.7333
26/11/2006	4.4	2.9	0.7	-1.3	6	4.7	4.7	3.9	4.26111	2.77778	5.1	2.9	5.6	4.76111	10.4444	8.26111	16.3111	13.6111
27/11/2006	4.5	2.9	1.6	-0.6	6.4	4.6	5.1	3.7	4.67778	2.99444	5.1	3.4	6.28889	4.76111	10.3722	8.55556	15.6778	13.6889
28/11/2006	5.4	3.9	2	0.9	6.6	5.5	5.4	4	5.19444	3.33333	5.4	3.8	6.69444	5.15556	11.1056	8.55	17.0667	14.0778
29/11/2006	4.5	4.3	0.6	0.8	6	5.5	5	4.5	4.40556	4.1	5.1	4.5	5.83889	5.31111	10.5278	#N/A	16.1444	15.0333
30/11/2006	4.2	4.3	0.1	1.6	5.6	5.5	4.6	4.5	4.3	3.75556	4.5	4.8	6.32222	4.92778	10.2333	#N/A	15.5111	15.4444
1/12/2006	3.8	5.4	0.2	2.6	5.2	6.2	4.3	5.2	3.5	4.46667	4.3	5.5	5.37222	5.36667	9.52778	10.7	15.0556	16.1111
2/12/2006	4	6	0.1	3.6	6	6.7	4.5	5.7	4.38333	5.16111	4.8	6.3	6.00556	5.95556	10.4	11.2944	15.5556	16.7778
3/12/2006	3.5	5.8	0	3.1	5.2	7.1	4	6	3.11111	5.30556	3.5	6.1	4.92222	6.06667	9.23333	11.2	14.7	16.8667
4/12/2006	4.5	5	1	2.4	5.9	6.3	4.6	5.2	4.61111	4.57778	4.5	5.5	6.15	5.88333	9.87778	10.0889	15.2667	15.5556
5/12/2006	3.2	4.7	-0.7	2.3	4.4	6.2	3.7	4.9	3.65	4.87778	3.3	5.2	5.52222	6.47222	9.13889	10.5611	13.8444	15.8667
6/12/2006	4.3	4.2	-0.8	1	5.8	5.6	4.7	4.6	3.81111	4.06111	4.2	4.7	5.86111	6.01667	9.48889	9.91111	14.4556	14.8778
7/12/2006	3.9	4.3	-0.8	1.2	5.4	5.5	4.4	4.5	4.47222	4.40556	4.1	4.7	6.88889	5.85556	10.2722	9.67222	14.9111	15.7778
8/12/2006	4.6	5	0.2	1.3	5.9	6.1	4.5	5	4.89444	5.14444	5	5.5	6.51111	7.3	9.8	10.4222	14.6333	16.9222
9/12/2006	4.7	4.8	1.3	0.8	6.1	6.4	4.5	5	4.57778	4.62778	4.5	5.7	5.73333	5.67778	10.3222	11.0333	15.6778	16.5778
10/12/2006	5.2	4.9	2.3	1.4	6.2	6.1	5	5.3	4.15	5.01111	4.7	5.8	4.76667	6.30556	9.99444	11.5111	16.0111	16.3556
11/12/2006	7	5.3	4	0.9	8.4	6.5	6.5	5.8	5.79444	5.18333	7	5.8	6.38889	6.45556	11.6667	11.3056	17.8556	16.3444
12/12/2006	5.8	5.4	3.5	1.8	7	6.6	5.5	5.7	5.45	5.32778	6	5.9	6.54444	7.09444	12.1278	11.1444	18.2	16.5333
13/12/2006	5.4	4.6	2.8	1	6.7	6.1	5.1	5.3	4.72222	4.85	5.6	5.2	5.5	6.83889	11.3611	11.1611	17.2556	16.5
14/12/2006	6.1	4.3	4.2	-0.7	7.1	6.1	6	5.2	5.07778	5.15556	6.3	4.7	5.73889	7.81667	11.5667	11.2833	17.6	15.8667
15/12/2006	7.6	1.6	5.4	-1.8	8.5	3.3	7.4	2.9	7.07222	2.12222	8	2.5	7.73889	3.97778	12.9611	8.15556	18.9	12.9889
16/12/2006	7.4	3.9	5.3	1.3	8.2	5.3	7.1	4.8	6.87778	3.95556	7.9	4.7	7.17778	5.55556	13.4611	9.58333	19.7	15.5778
17/12/2006	6.2	5.2	4.4	3	7.2	6.5	6.5	5.4	5.38889	4.67222	6.6	5.6	6.01667	5.95556	11.9611	10.5889	18.2	16.7111
18/12/2006	5.8	5.6	3	3.2	6.5	6.3	6.3	6.1	4.73333	4.65556	6	5.9	6.44444	5.83889	11.2389	11.7	16.7889	17.4778
19/12/2006	4.5	5.3	1.8	2.3	5.4	5.6	5.9	5.8	3.67778	4.40556	4.5	5.4	5.62222	5.72778	10.2333	10.9833	15.9333	16.6444
20/12/2006	4.1	3.4	2.6	0.5	4.9	4.4	5.4	4.5	3.35556	3.48889	4.6	4.2	4.28333	5.08333	9.86111	10.35	15.8333	15.6778
21/12/2006	5.5	3.6	2.8	1.5	6.3	4.3	6.4	4.4	4.56111	3.07778	5.7	3.8	6.12222	4.03333	10.9333	8.48889	16.7667	14.2111
22/12/2006	5.6	4.2	2.7	2	6.9	4.6	6.4	4.9	5.34444	3.57778	6.1	4.1	6.89444	4.67778	11.1611	8.77778	16.9333	15.4111
23/12/2006	6	3.3	3.1	0.7	7.2	3.8	6.5	4.5	5.36667	2.83333	5.9	3.1	6.23889	4.27778	10.8833	8.13333	16.6	14.0556
24/12/2006	5.4	3.4	2.3	0.2	6.4	4.6	6.1	5	5.2	3.60556	5.9	3.8	6.11111	5.75	11.2111	9.18889	16.8667	13.9889
25/12/2006	3.6	1.5	0.5	-2.4	4.8	2.5	4.9	3.4	3.63333	1.06111	3.8	1.1	5.6	3.66667	10.2889	6.92778	15.5667	11.9778
26/12/2006	2.8	2.2	0.1	-1.7	4.2	3.1	4.2	3.6	3.11667	1.38333	3.2	2.1	5.1	2.7	9.41111	6.61667	14.8778	12.0222
27/12/2006	2.7	1.2	1.3	-2.7	3.4	2.8	3.9	2.4	2.86667	1.21111	3.6	1.4	4.69444	2.87778	9.22778	6.83889	15.2	12.1556
28/12/2006	3.7	1	1.1	-1.9	4.6	2.1	4.7	2.1	3.32222	0.755556	3.8	1.5	5.12778	2.71667	8.67778	6.46111	14.2889	12.2
29/12/2006	2.6	2.6	-0.1	0.2	3.4	3.6	3.8	3.6	2.43889	1.82778	2.8	2.7	4.96111	3.17778	7.99444	7.04444	13.1222	13.2444
30/12/2006	1.9	3.1	-0.3	0.2	2.7	4.3	2.9	3.8	1.55556	2.77222	2.1	3.4	3.9	3.97778	7.35	#N/A	12.7778	13.3667
1/1/2007	3.2	2.1	1	-2.1	3.6	2.9	4.1	2.9	2.88889	1.46111	3	1.9	4.34444	3.06111	8.43889	6.78333	13.9556	12.3
2/1/2007	2.9	2	0.3	-1.8	3.7	3.2	4.1	2.8	2.72222	2.4	2.9	2.5	4.43333	4.38889	8.42778	7.12778	13.9889	13.0111
3/1/2007	3.9	1.8	0.8	-1.9	4.6	2.9	4.8	3	2.86667	1.96111	3.7	1.7	4.33333	4.19444	8.72222	7.39444	14.4889	12.0667
4/1/2007	5.1	0.4	1.9	-3.3	6.2	1.8	5.6	1.7	4.51667	1.52778	5.5	0.7	6.13333	3.77778	9.92778	7	15.6889	11.5444
5/1/2007	4.2	2.1	0.7	-1.4	5.4	3.3	4.7	2.6	4.42222	2.15556	4.4	2.3	6.33889	3.55	9.86111	6.57778	15.4556	12.1889
6/1/2007	2.9	4	-0.7	0	4.1	4.7	3.7	4.2	3.95556	3.77778	3.3	4.2	6.32778	5.67222	9.37222	8.30556	14.7333	14.2222
7/1/2007	3.3	3.5	0	0.3	4.6	4.3	4.1	4.1	3	3.36667	3.7	3.6	5.07778	4.94444	8.66667	9.18889	14.1111	14.6667
8/1/2007	3.7	4.5	0.3	1.3	5.1	5.2	4.3	4.8	3.71111	3.91111	3.9	4.3	5.58333	4.86667	9.17222	9.49444	14.4222	15.0111
9/1/2007	2.5	5.7	-1.3	2.1	3.6	6.8	3.3	5.5	3.07778	5.00556	2.9	5	4.72222	5.79444	8.33889	10.0111	13.5667	15.9778
10/1/2007	1.6	3.9	-1.6	1	3	4.7	2.5	4.5	1.74444	3.67222	2.1	3.7	3.47222	4.83333	7.22222	9.07222	12.5	14.5222
11/1/2007	1.8	3.5	-0.4	1.5	3	3.7	2.4	4.1	1.65	2.73333	2.1	3.2	3.42778	4.55556	7.11667	8.00556	12.8556	13.5111
12/1/2007	2.5	3.2	0.4	1.3	3.6	4.1	3.1	4.2	2.58333	2.59444	2.6	3	4.65	4.55556	8.05	8.07222	14.0333	14.0778
13/1/2007	4.2	3.5	0.8	1.2	5.4	4.7	3.9	4.3	4.14444	3.24444	4.1	3.6	5.23333	4.49444	9.26111	8.87222	15.3444	14.9
14/1/2007	3.6	3.7	-0.3	0.2	4.6	5.2	3.8	4.4	4.03889	3.90556	3.6	3.6	6.13333	5.95556	9.53333	9.76111	15.1	15.4
15/1/2007	4.2	2.7	0.1	-0.4	5.4	4.3	4.1	3.5	4.64444	3.07778	4.6	3	6.71111	5.57778	9.80556	8.88333	15.2222	14.3889
16/1/2007	3.5	2.4	-1	-0.9	4.7	4	3.5	3	4.17222	2.6	3.4	2.3	6.85556	4.01111	9.37222	8.58889	14.4556	14.1667
17/1/2007	2.7	3.3	-2.2	0.2	4.4	4.9	3	3.6	2.98333	3.26667	2.8	4.1	5.51667	4.54444	8.56111	9.32222	13.7111	15.0333
18/1/2007	1.9	3.2	-2	-0.6	3.9	4.6	2.4	3.3	2.47222	3.12222	2.4	3.7	4.49444	4.28889	7.93889	9.21667	13	15.0889
19/1/2007	2.8	2.9	-1	-0.5	4.2	4.2	2.6	3.5	3.17222	2.78333	3.2	3.2	4.64444	4.39444	8.13333	8.52778	13.5889	14.2444
20/1/2007	3.7	2.7	-0.5	-0.3	5.5	4.1	4	3.2	3.68889	3.04444	4	2.9	5.87222	5.11111	9.39444	8.61667	14.5667	14.4111
21/1/2007	4.1	3.2	0.3	-0.4	5.6	4.5	3.8	3.6	4.21667	3.25556	4.3	3.4	6.20556	4.97778	9.78333	8.78333	15.3222	14.7889
22/1/2007	4.9	3.8	1.5	-0.1	6.1	5.4	5.1	4.4	4.61111	4.07222	5	4.2	6.13333	5.36667	10.4722	8.93889	16.4667	14.6667
23/1/2007	4.5	2.8	0.3	-0.7	6.1	4.5	4.7	3.3	4.75	3.22222	4.5	2.9	7	5.41667	10.6667	8.60556	16.2	14.3333
24/1/2007	3.7	2.7	-0.9	0.1	5.2	4.2	3.9	3.3	3.55	2.86111	3.4	3	5.27222	4.48889	9.50556	8.59444	15.0778	15.2667
25/1/2007	3.6	3.5	-1	0.9	4.9	5	3.8	3.7	3.72778	3.41111	3.4	3.7	5.56111	5.08333	9.66111	9.32778	15.1	15.7889
26/1/2007	3.5	3.7	-0.2	1	4.7	5.4	3.8	4.2	3.52778	3.67778	4.1	4.2	5.90556	4.86667	9.83333	9.38333	15.6111	15.7222
27/1/2007	2.8	3.5	-1.3	0.1	4.6	5.1	3.5	4.2	2.97778	3.71667	3.5	3.9	5.25	6.09444	9.8	9.65	15.4778	15.4111
28/1/2007	2.4	3.7	-0.9	0.5	4.5	4.9	3	4.2	2.77778	3.00556	3.2	3.7	4.39444	4.66667	8.94444	9.10556	15.1	15.1667
29/1/2007	3.3	4.3	-0.5	1.3	4.6	5.5	3.4	4.9	3.22778	3.67778	3.7	4.5	4.53889	5.01667	9.37222	10.0667	15.5	16.2778
30/1/2007	2.8	4.8	0.2	0.8	4.4	6	3.3	5	3.01111	3.95556	3.3	4.4	4.75556	5.56111	8.94444	#N/A	15.0889	16.0333
1/2/2007	2.4	5	-0.7	0.1	4	6.3	2.8	5.5	2.61667	3.87222	3.2	4.1	5.14444	6.23889	8.78333	9.3	14.7111	14.5
2/2/2007	3.3	3.8	-0.2	-0.7	4.6	5.6	3.6	5.1	2.96111	3.07778	3.4	3.4	4.73889	5.89444	8.27778	9.11111	14.2556	14.4333
3/2/2007	2.6	2.9	-0.7	-1.8	4.3	5	3.2	4.3	2.63333	2.87222	2.9	2.7	5.36111	6	8.41667	8.35	14.2444	13.1556
4/2/2007	2.4	2.5	-0.3	-2.3	3.9	4.7	3.1	3.9	2.21111	2.66667	3.3	2.4	4.42222	5.62778	8.07222	8.15556	14.2667	13.2889
5/2/2007	3.8	3	1.5	-1.6	5.3	5.2	4.4	3.9	3.28333	3.43889	4.6	3.1	5.22778	5.71667	9.01667	8.89444	15.8889	14.0444
6/2/2007	4.7	3.2	2.1	-1.5	5.9	5.6	5	4.1	4.07778	3.45556	5.1	3.2	5.67778	6.00556	10.0778	9.3	16.9333	14.6556
7/2/2007	5.3	3.1	2.9	-2.3	6.4	5.2	5.5	4.1	4.59444	3.25	5.8	2.8	5.80556	6.30556	11.0333	8.84444	17.6667	13.9667
8/2/2007	6	3.2	3.4	-2.3	6.8	5.1	5.7	4.1	5.12778	3.71111	6.3	3.2	6.78889	6.95	11.0056	8.48889	17.6556	13.8778
9/2/2007	5.4	2.6	3.2	-2.5	6.7	4.4	5.9	3.5	4.72222	2.60556	5.6	2.8	6.52222	5.91111	10.1611	7.88333	16.7	12.8889
10/2/2007	5.6	2.3	3	-2.7	6.1	4.7	5.8	3.6	4.76667	2.82778	5.8	2.9	6.95556	5.45	10.7111	8.23889	17.0556	13.7111
11/2/2007	5	3.3	2.9	-0.3	6.3	5.4	5.4	4.4	4.96111	3.68333	5.4	4	6.96111	5.60556	10.6222	9.23889	16.6111	15.7778
12/2/2007	6.1	4.4	3.3	0.4	7.8	6.3	6.7	5	5.47222	4.45556	6.1	4.2	7.34444	6.82222	11.4	10.0389	17.9333	16.3556
13/2/2007	6.3	4	3.1	-0.6	8.4	6.1	6.7	4.7	6.03333	4.33889	6.2	4	7.84444	6.94444	11.5	10.3056	18.3222	16.1556
14/2/2007	4.6	3.6	0.5	-1.1	6.7	5.6	5.7	4.1	5.02222	3.5	4.7	3.7	8.07778	6.39444	10.4667	9.27222	15.9889	14.8222
15/2/2007	2.8	4.4	-0.8	0.9	5.5	6.8	4.5	5	3.34444	4.52222	3.4	5.1	5.50556	6.83333	8.59444	10.2167	14.2889	16.4111
16/2/2007	2.7	5.7	-0.5	2.3	5.6	7.6	4.4	6	3.55	5.90556	3.9	6.4	6.01667	7.84444	8.77222	11.5222	14.9333	18.1556
17/2/2007	2.9	5.9	-1.4	2.3	5.5	7.7	4.3	6.3	3.46111	5.94444	3.4	6.2	5.57778	7.21667	8.75556	11.9944	14.7111	18.6111
18/2/2007	2.3	7.1	-1.8	2.8	5.1	9.2	4.2	7.3	2.82222	7.26111	2.8	6.6	5.35	9.20556	8.07778	12.2889	14.0889	19.0222
19/2/2007	2	5	-2.1	0.3	4.4	6.8	3.3	6	2.68333	6.4	2.3	5.7	5.31111	9.40556	8.13889	12.0111	13.7444	18.1
20/2/2007	2.4	5.4	-1.4	0.8	4.6	7.6	3.3	6.1	2.38333	5.92222	2.8	5.6	4.65556	7.22222	7.77778	11.7167	13.4778	17.9444
21/2/2007	3.5	6.1	0.3	1.2	6.1	8.2	4.3	6.6	3.31667	6.35	4	6.1	5.67778	7.88889	8.68889	11.7389	15.3667	17.9222
22/2/2007	4.7	5.2	0.9	1	7	8.1	5.8	6.2	4.36111	5.50556	5.1	5.2	6.26667	7.98889	9.75	11.6778	16.0333	17.6778
23/2/2007	5.2	6.2	1.6	1.1	7.2	8.7	6.1	7	5.35	6.11667	5.7	5.8	7.36667	7.65	10.8333	11.8778	16.9111	17.9111
24/2/2007	4.8	5.5	1.3	0.7	6.8	8.1	5.7	6.4	5.17222	5.76111	4.9	5.3	7.26111	7.38889	10.6778	11.1	17.1	17.1444
25/2/2007	3.6	5.3	-1.2	1.3	6	7.7	5.1	6.4	4.21111	5.51111	3.7	5.5	6.33333	7.93333	9.65	11.35	15.3556	17.6778
26/2/2007	2.7	6.2	-1.9	3.4	5.2	8.7	3.8	7.1	3.44444	6.58333	3.5	6.7	5.91111	8.33889	8.81111	11.6444	14.3111	18.8667
27/2/2007	3.7	6.7	-0.7	3.5	5.8	9.2	5.3	7.7	3.67778	7.55	3.9	7.1	6.55	9.85556	9.51111	#N/A	15.2111	18.4333
28/2/2007	2.4	5.8	-2.4	2.6	4.8	8.5	3.9	7.2	2.77222	6.62222	2.7	6.4	5.32778	9.17222	8.71667	#N/A	14.3222	17.9
1/3/2007	1.8	5.6	-3.2	2	4.3	7.9	3.5	7.1	2.53889	5.76111	2.3	5.9	4.57222	8.27222	8.10556	11.2667	13.9778	17.4778
2/3/2007	1.8	5.3	-2.8	1.2	4.6	7.5	3.2	6.3	2.45556	5.36111	2.4	5.3	4.37778	8.09444	8.65556	10.4944	14.5556	17.1778
3/3/2007	2.6	4.2	-1.3	-0.3	4.8	6.9	3.8	5.8	2.98889	4.82222	3.2	4.6	5.47222	7.27222	8.57222	10.2556	14.6667	16.3667
4/3/2007	3.6	4	-0.2	-0.4	5.9	6.9	4.4	6	3.82222	3.89444	4.1	4.2	5.71111	6.32222	9.14444	9.9	15.2556	15.7
5/3/2007	5.4	5.8	1.8	1.7	7.7	8.4	6	7.4	5.07778	5.26667	6	5.8	7.07778	7.36667	10.5167	10.9444	16.7889	17.3556
6/3/2007	7.1	5.9	3.1	2.1	9.1	8.5	7.7	7.5	6.24444	5.86667	6.7	5.9	7.65	8.48333	10.6944	12.1444	16.6333	18.2667
7/3/2007	6.2	5.5	2.4	1.7	8.5	8.3	7.4	7.5	6.01667	5.65556	6.3	6	7.71667	8.36667	10.4556	11.5056	16.3889	17.4667
8/3/2007	4.7	5.5	0.8	1.8	7	8.1	6.4	7.2	4.72778	5.88333	4.9	6.3	6.67222	8.37778	9.6	11.7	15.9778	17.8333
9/3/2007	4.9	5	1.4	1.3	7.4	7.5	6.1	7.3	4.7	5.15	5.4	5.5	7.83333	7.77222	10.2667	11.0778	17.1778	17.1889
10/3/2007	6.1	5.3	2.4	0.2	8.4	7.8	7.4	7.2	5.93333	5.16111	6.2	5.1	8.32778	7.46667	11.0667	11.0722	16.9889	17.1556
11/3/2007	5.8	5.7	2.2	0.4	8.3	8	7.2	6.8	6.10556	5.46111	6.2	5.6	8.22222	8.01111	11.6889	11.2944	17.5444	17.8667
12/3/2007	5.8	6.7	2.2	1	8.3	8.8	7.3	7.9	6	6.93333	6.2	6.4	8.31111	8.48889	11.2056	11.9111	17.6333	18.9333
13/3/2007	4.6	5.4	0.8	0.2	7.3	7.9	6.6	6.7	4.64444	5.78333	5.2	5.9	7.59444	8.6	10.3778	12.0056	16.6667	18.4778
14/3/2007	5.3	5.1	0.9	0.5	7.9	7.5	6.7	6.6	5.04444	4.97778	5.6	5.5	7.66111	6.91667	10.5167	11.4389	16.8333	17.9889
15/3/2007	5.4	5.8	1.1	2	8	8.3	6.9	7.6	5.2	6.42778	5.7	6.4	7.34444	8.95556	10.4111	13.1444	16.8	19.1556
16/3/2007	5.1	5.8	1.1	2	7.8	8.3	6.8	7.5	4.56667	6.13333	5.3	6.6	7.33333	8.68333	10.3389	12.5667	16.6	18.9222
17/3/2007	5.1	7.3	1.5	3.2	8.2	9.6	7.1	8.7	4.85	7.06667	5.4	7.8	6.80556	9.63333	10.4722	12.5889	17.1	19.2556
18/3/2007	6.4	7.4	2.9	2.8	9.4	9.6	7.8	8.2	6.83889	7.25556	7.2	7.7	8.85556	9.81667	11.7889	12.6111	18.6444	19.2444
19/3/2007	6	8.1	1.9	4	8.6	10.7	7.7	9.2	6.83889	7.84444	6.5	8.5	8.98333	10.2056	12.2278	13.7889	18.4667	20.6
20/3/2007	6	8.4	1.2	3.7	8.4	10.9	7.4	9.8	6.76667	8.27222	6.5	8.9	9.17778	10.2111	12.3444	13.7778	18.5778	20.1778
21/3/2007	5.3	8.1	0.6	3.4	7.6	10.6	6.7	9.6	5.69444	8.09444	5.6	8.4	8.93889	10.5333	11.9944	13.1611	18.2667	19.6778
22/3/2007	5	7.7	-0.2	2.5	7.7	10.6	6.5	9.4	5.41111	8.25	5.2	7.7	7.70556	10.5833	11.5111	12.6111	17.5333	18.5222
23/3/2007	6.1	6.5	2.2	0.7	9.4	9.2	7.3	7.9	6.35	7.56111	6.6	6.8	8.13889	10.3778	12.3	12.6889	19.1556	18.6
24/3/2007	7.1	6.8	2.3	1.5	10.2	9.3	8.5	8.3	6.98889	7.4	7.3	7.1	8.86111	9.58889	12.5944	13.4333	19.2333	19.3556
25/3/2007	7.9	6.9	2.6	1.4	10.4	9.2	8.7	8.3	7.56667	7.11111	7.7	7	9.85556	9.78889	12.5722	13.4667	19.0778	19.8778
26/3/2007	8.7	7	3.4	1.9	11.4	9.3	9.7	8.5	8.66111	7.05556	8.6	7	10.8333	9.92778	13.8722	12.4611	20.5333	18.6778
27/3/2007	9	5.9	3.8	1.1	11.5	8.6	10.2	7.7	9.08333	6.36667	9	6.1	11.5556	9.08333	13.8333	11.9056	20.2778	18.1889
28/3/2007	8.3	5.4	3.2	0.6	11	7.8	9.7	7.1	8.73333	5.71667	8.1	5.5	10.9389	8.46111	13.7167	11.4278	20.0333	17.5667
29/3/2007	7	6.1	2.3	2.2	9.9	9	8.8	8.1	7.73889	6.58889	7.5	6.8	10.4833	8.99444	12.8111	11.8667	19.0667	18.2222
30/3/2007	7	7	2.1	3.1	9.8	9.7	9.1	8.5	7.8	6.60556	7.6	7.2	10.8722	9.09444	12.95	#N/A	19.4444	18.1889
1/4/2007	7.2	6.7	2	2.7	10.1	9.4	8.6	8.5	8.06667	7.21111	7.8	7.4	10.9222	9.61667	13.6833	12.3111	20.2778	19.3889
2/4/2007	5.6	7.5	0.4	2.9	8	10	7.3	8.9	6.10556	7.95	5.8	7.8	10.0444	10.1833	12.2722	13.1444	18.2556	19.9222
3/4/2007	5.3	6.5	0.6	1.5	8.4	9.1	7.2	8.6	5.88889	6.76111	5.9	6.8	8.71667	9.77778	11.5889	11.8056	17.6556	18.1556
4/4/2007	6	5.8	1.1	0.8	8.7	8.2	8	7.7	6.04444	6.13889	6.1	6.1	9.31667	8.86667	11.5611	11.0278	17.5111	16.2667
5/4/2007	5.6	6.5	0.8	2.4	8.5	9.3	7.5	8.3	6.23333	7.02222	5.8	7.4	8.75	9.67778	11.1278	11.9778	17.3111	17.6889
6/4/2007	6.9	8.2	2.4	3.9	10	10.8	8.6	9.6	7.57778	8.71111	7.1	8.7	9.12778	11.3333	11.9556	13.2167	18.2778	19.7667
7/4/2007	7.8	8.4	3	3.5	10.2	11	9	10	8.54444	8.77222	8.5	8.9	11.1056	11.1444	12.7944	13.2278	19.1889	20.1667
8/4/2007	7.6	7.7	1.9	3	9.9	10.7	8.8	9.6	8.05	8.37778	7.6	8.3	10.9944	10.9667	13.4389	13.0278	19.5667	19.4778
9/4/2007	6.9	7.6	1.4	3.2	9.5	11.1	8.2	9.5	8.26667	8.05556	7.4	8.1	10.7222	11.0222	13.5278	12.95	19.6778	19.5667
10/4/2007	7	8.4	2.5	3.3	9.7	11.3	7.9	10.5	7.94444	8.55556	7.6	8.7	10.4111	11.0722	13.1722	13.2944	20.0333	19.7
11/4/2007	7.2	7.1	2.2	2.2	9.7	10	8.3	8.8	8.28889	8.20556	7.6	7.5	11.0444	11.2722	13.2056	13.5222	19.7333	19.9444
12/4/2007	5.8	7.3	0	1.9	8.2	10.1	7.4	8.9	6.73333	8.18333	6.1	7.8	9.61111	10.9944	12.2556	13.05	18.0667	19.2333
13/4/2007	7.1	7.3	1.8	2.1	9.6	9.9	8.1	8.9	7.43889	8.06111	7.4	7.9	10.0333	10.9556	12.5944	13.0278	19.1778	18.9222
14/4/2007	8.2	7.7	2.9	2.4	10.7	10.1	9.4	9	8.56111	8.02778	8.2	8	11.1056	10.8167	13.6111	13.5111	20.4556	20.5667
15/4/2007	7.5	8.4	2.3	3.9	10.4	10.7	8.8	9.7	8.26667	8.73889	7.8	9	10.4556	11.1389	12.9778	14.2278	19.4444	21.5111
16/4/2007	7.7	9.2	2.9	4.1	10.7	11.8	9.1	10.6	8.51111	10.0611	7.9	9.3	10.7	12.4722	13.6444	15.0111	20.1444	21.7333
17/4/2007	7.1	9.6	2.2	4.1	9.7	12.1	8.9	10.6	8.26111	10.0222	7.6	9.6	11.4889	12.8389	13.7667	14.65	20.3111	21.7222
18/4/2007	7.2	9.6	1.7	4.3	9.5	11.8	8.5	10.5	7.65556	9.93889	7.5	9.7	10.8444	12.65	13.0389	14.7722	18.8778	21.3444
19/4/2007	7.5	9.1	2.4	4.1	9.7	11.6	8.1	9.8	7.85	9.28889	7.7	9.4	10.2667	12.1889	13.4278	14.4667	19.6556	20.9667
20/4/2007	7.4	9.2	2.4	3.9	9.9	11.7	8.4	10.2	7.56667	9.75	7.3	9.2	10.0167	12.4556	12.2222	15.3444	18.7	22.3778
21/4/2007	7.7	8.9	2.5	3.6	10.5	11.3	8.5	9.9	8.08333	9.86111	7.3	9	10.4222	13.2667	12.2889	15.3611	18.8222	21.9889
22/4/2007	8	9.7	3.1	4.7	10.7	12.3	8.7	10.5	8.41111	10.0667	8.1	9.9	11.7722	13.2167	13.8111	15.1444	20.2	22.3222
23/4/2007	8.7	9.8	3.8	4.7	11.2	12.3	9.3	11	9.13889	10.3833	9	9.6	11.85	13.2	13.7	15.4278	20.4222	22.4778
24/4/2007	8	9.4	3.2	3.8	10.5	12.1	9	10.7	8.63889	9.24444	8.2	9.1	11.7278	12.5111	14.2444	14.85	20.9222	21.5111
25/4/2007	7.3	9.1	2.1	4.3	9.6	12.1	8.2	10.1	8.38889	9.6	7.4	9	11.6167	12.2722	13.4333	14.7111	19.6333	21.1111
26/4/2007	7.9	9.3	3.2	4.6	10.4	12.2	8.5	10.3	8.04444	10.1556	8.5	9.7	11.3778	12.9667	13.4889	15.4333	19.8778	21.7556
27/4/2007	9.6	9.3	5	4.1	12.1	12.1	10	10.5	10.15	9.93333	9.5	9.6	12.5833	12.9833	15.1056	15.4611	21.8556	22.1
28/4/2007	9.9	9.5	5.6	4.4	12.4	12.3	10.7	10.4	10.6278	10.2889	10.4	9.6	12.95	13.2	15.8944	15.4389	22.8222	22.1111
29/4/2007	10.9	9.9	6.4	5	13.3	13.1	11.4	11	11.0667	10.4389	10.9	9.9	13.4167	13.0167	16.1111	#N/A	22.8111	21.0778
30/4/2007	11	9.7	6.6	5	13.6	12.6	11.1	10.3	10.4611	10.15	10.7	9.8	12.8833	12.7778	15.2389	#N/A	22.2111	21.1778
1/5/2007	11.5	10	6.6	6.1	14	13.1	11.9	10.9	11.1167	10.6944	11.3	10.7	13.4889	12.9944	15.7444	15.2111	22.5222	21.7
2/5/2007	11.6	12.1	6.8	8.1	14.2	15.3	12.4	12.7	11.6889	12.1944	11.8	12.2	14.2556	14.8889	16.2556	17.3278	23.1111	24.3333
3/5/2007	11.2	13.1	7	9.2	14.1	16.3	12.4	13.9	11.6722	13.1722	11.7	13.5	14.3222	15.6611	16.9111	18.0944	23.4778	25.1222
4/5/2007	11.4	13.6	7.4	9.2	14.5	16.5	12.6	14.1	11.4278	12.9667	11.4	13.2	14.1333	16.0944	16.3889	18.4222	23.0111	25.8111
5/5/2007	11.7	14.1	6.7	9.8	14.3	17	12.5	15	12.1667	13.7444	11.8	13.9	14.4944	16.7667	16.7111	18.5611	23.5667	26.2556
6/5/2007	11.2	12.5	5.8	7.8	13.8	15.3	11.8	14.1	11.4944	13.2111	11.4	12.3	14.1667	16.4111	16.4722	18.45	22.6556	25.7111
7/5/2007	10.5	11	5.3	6.5	13.1	14.1	12	12.7	10.8333	11.4556	10.6	11	14.3778	14.85	15.7167	17.2278	22.1778	23.3444
8/5/2007	10.4	11.1	6	6.4	13.5	13.9	11.2	12.4	10.8556	11.2556	10.7	10.8	14.0333	14.8944	15.2278	16.5056	21.5667	22.4556
9/5/2007	11.7	10.8	7.8	5.8	14.3	13.6	12	11.9	11.8667	11.4889	11.6	10.6	15.0667	14.8167	16.4	16.1944	23.4333	22
10/5/2007	12.5	10.2	8.7	5.3	15.1	13.3	13.1	11.7	12.35	11.0444	12.1	10.3	15.3722	14.7167	16.8167	16.2833	23.7111	21.9667
11/5/2007	11.7	11.4	7.8	6.9	14.5	14.5	12.8	12.5	12.2333	11.9222	11.9	11.5	15.5667	14.9278	17.1056	17.0278	23.8889	23.1444
12/5/2007	12.2	11.6	8	6.9	14.8	14.5	13.3	12.4	12.85	11.95	12.4	11.4	15.75	15.2778	16.7889	17.0278	23.5889	23.8111
13/5/2007	11.1	12.7	6.4	7.7	13.6	15.6	12.6	13.4	11.8	12.8833	11.1	12.2	15.4889	15.1278	17	16.9	23.4889	23.6222
14/5/2007	11.4	12.1	6.8	7.6	14.4	15.6	12.4	13	11.9278	12.85	11	11.8	14.8056	15.45	16.0611	17.0167	22.6667	23.7
15/5/2007	11.9	12.7	6.5	8.4	14.5	16	12.7	13.7	12.2333	13.6833	11.1	12.5	14.8778	16.45	15.9944	17.8667	22.3222	24.6333
16/5/2007	12.6	13.7	7.8	9.4	15.1	16.6	13.4	14.6	12.4167	14.1389	12.1	13.2	15.4556	16.5278	16.5111	17.5333	23.2667	24.4
17/5/2007	12.3	13.3	7.4	9	14.6	16.6	12.9	14.3	12.3389	14.0556	11.8	13.1	15.45	16.0556	16.9944	17.4444	23.4556	24.6222
18/5/2007	12.1	13.6	7.5	8.9	14.6	16.4	12.9	14.3	11.8167	13.7778	11.6	13.5	14.7778	16.6667	16.3556	18.2778	22.5667	25.0889
19/5/2007	11.4	14	6.5	10.2	13.8	17.2	12.2	14.9	11.5111	14.5222	11.1	14.2	15.0778	17.2833	16	18.7611	22.1333	25.6222
20/5/2007	11.3	13.5	6.7	9	14.4	16.3	11.7	15.2	11.45	13.8278	11.1	13.1	14.0722	16.9167	15.7444	18.0444	22.0222	24.1
21/5/2007	11.8	11.7	7.6	7	14.7	15.4	12.8	13.1	12.2944	12.4778	11.7	11.6	14.8222	15.0611	16.5111	17.1778	23.3556	23.1778
22/5/2007	12.1	11.7	7.1	7.5	14.6	15.3	12.8	12.7	12.3056	12.5667	11.6	11.5	15.1	14.7556	16.3722	16.4389	23.0778	23.0889
23/5/2007	11.6	13	6.2	8.4	14.1	16.4	12.2	13.6	12.0944	13.4056	11.4	12.8	15.15	15.8389	16.5111	17.1833	22.8111	23.8333
24/5/2007	11.1	13.5	5.9	9.3	13.8	16.7	11.5	14.6	11.5833	14.4556	10.4	13.7	14.7556	17.3167	16.6111	18.0444	23.1889	24.5778
25/5/2007	10.8	13.1	6.3	8.9	13.9	15.8	11.8	14.4	11.6667	14.4833	10.7	12.8	14.6222	17.5556	16.6722	18.8444	23.6778	25.3889
26/5/2007	11.2	12.3	6.4	7.5	13.7	15	11.9	13.5	11.6222	13.5889	11	12.4	14.7833	16.8778	17.0111	18.2111	23.9	24.8333
27/5/2007	12.1	12.8	7.9	7.9	14.7	15.4	12.5	13.6	12.1278	13.5056	11.8	12.6	15.7722	16.3167	17.05	18.05	24.2111	24.9444
28/5/2007	13.9	13	9.5	8.3	16.5	16.1	14	14.1	13.05	13.6944	13	12.6	15.9056	16.7556	17.2667	17.5889	24.5778	24.3889
29/5/2007	14.9	13.2	10.7	8.5	17.5	16.5	15.2	14.1	14.2111	13.7611	14.5	12.9	16.8333	16.75	17.7778	17.9944	25.1667	24.8
30/5/2007	15.8	13.6	11.6	9	18.2	16.4	16	14	15.7389	13.8667	15.2	13.3	18.0778	17.0389	19.1444	#N/A	25.9222	24.7
1/6/2007	14.9	14.2	10.2	10.5	17.4	16.7	15.2	15.2	15.0667	13.8278	14.3	13.8	17.7944	17.3167	18.9	18.0889	26.0111	24.9889
2/6/2007	14.5	14.6	9.9	10.4	17.1	17.4	14.9	15.6	14.6444	14.4333	13.8	14.1	17.8444	17.3722	18.8556	18.3167	25.7778	25
3/6/2007	14.9	13.9	10.5	9.9	17.9	16.9	15.8	15	14.7444	13.9333	14.2	13.6	17.6333	17.6167	18.8889	18.2611	25.7222	24.7889
4/6/2007	15.9	13.6	11.9	9.8	18.7	16.6	16.7	14.6	15.4889	14.1667	15.5	13.4	18.8333	17.4222	19.5389	18.05	26.4667	25.0778
5/6/2007	16.2	13.8	12	9.4	18.9	16.5	16.9	14.6	15.5167	14.2778	15.3	13.2	18.75	17.7833	19.3833	18.2722	26.2	25.6778
6/6/2007	16.5	13.7	11.6	9.4	19.2	16	17.3	14.3	15.7722	14.5722	15.2	13.1	18.8222	17.65	19.1111	18.5056	25.5333	25.3222
7/6/2007	14.8	13.9	10.7	9.3	18	16.7	16.4	14.8	14.95	14.3222	14	13.3	18.1	17.4	18.8833	18.5722	25.8333	24.8444
8/6/2007	15	14.3	10.8	9.5	18.1	16.9	16.4	14.3	14.9889	14.25	14.1	13.5	17.8889	17.6222	19.1444	18.3611	25.8333	24.5
9/6/2007	15.9	15.2	11.7	10.8	18.8	17.8	16.9	15.6	15.4611	15.6333	14.8	14.7	18.5889	18.45	19.1611	18.9556	25.9444	25.7111
10/6/2007	16.1	14.9	11.8	10.9	18.9	17.6	17.2	15.9	16.2444	15.8222	15.2	14.9	19.0278	18.4444	19.35	19.1222	25.8	25.8
11/6/2007	14.8	15.1	9.8	11.1	17.2	18	16	15.9	15.7167	15.9056	14.1	15.3	19.2	18.65	19.9778	19.3556	26.3444	25.9667
12/6/2007	14.7	15.3	9.5	11.1	17.3	18.1	15.2	15.5	14.5778	15.6444	13.8	14.7	18.3389	18.55	19.6056	19.2278	26.1889	26.1556
13/6/2007	15.2	16	10.5	11.6	17.8	18.4	15.6	15.7	15.1278	15.4222	14.3	14.8	18.4556	18.1333	19.8944	19.1389	26.7778	26.1889
14/6/2007	16.4	16.7	12	12.3	19.3	19.4	16.7	16.5	15.5889	15.8722	15.2	15.5	18.9778	18.6667	19.8	19.2611	26.7444	25.8556
15/6/2007	17.4	17.4	13.4	13.3	20.3	19.6	17.4	17.1	16.5444	16.4889	16.1	16.1	19.5833	19.1167	20.1944	19.5722	27.1333	25.8667
16/6/2007	18.1	17.1	14	12.9	20.9	19.9	18.1	17.2	17.4944	17.1889	16.8	16.2	19.8833	19.7833	20.5833	20.1444	27.7889	27.2556
17/6/2007	17.7	16.5	13	11.9	20.6	19	18	16.7	17.1556	16.5167	16.3	15.8	19.5333	19.1722	20.4778	19.5222	27.2	26.3444
18/6/2007	17.5	16.5	12.8	12.1	20.5	18.9	17.9	17.1	16.5111	16.4778	16.2	15.8	19.3833	19.3222	20.0722	19.9278	26.6556	26.6444
19/6/2007	17.4	16.4	12.8	12	20.3	19.5	18	17	16.7111	16.6611	16.1	15.6	19.7167	19.4833	20.3111	20.3833	26.7778	27.2778
20/6/2007	17	15.8	13.2	11.3	19.9	18.3	17.9	16.1	17.0056	16.6	16.3	15.1	20.1111	19.5667	20.7333	20.8889	27.2556	28.1
21/6/2007	18	16.4	14.2	12	21	19.2	18.8	16.8	17.5278	16.6944	17.2	15.8	20.3833	19.7167	21.1778	20.5889	27.7889	27.4778
22/6/2007	18.8	17	14.8	12.7	21.8	19.5	19.1	17.6	17.85	17.1889	17.5	16.4	20.4556	20.1111	21.1778	20.6833	28.0444	27.5333
23/6/2007	18.4	16.8	14.3	12.5	21.3	19.5	19.1	17.4	17.7833	16.9889	17.4	15.7	20.4778	20.1889	20.9778	20.65	27.7111	27.2667
24/6/2007	18.9	16.7	14.5	12.6	21.6	19.3	19.5	17.3	17.9	16.7444	17.7	15.5	20.5611	20.0833	20.9278	20.6	27.6333	26.9111
25/6/2007	19	16.7	14.9	12.5	22.2	19.3	19.3	17.2	18.2944	17.0389	18.1	15.6	21.2	20.4444	22.2722	21.1278	29.0222	27.3333
26/6/2007	18.7	16.3	14.5	12.4	21.9	19	19.3	16.7	18.5722	16.4889	18	15.5	21.3444	19.9722	22.5778	20.9556	29.5333	27.8
27/6/2007	18.1	16.9	13.6	13.3	21	19.5	19.1	17	18.2167	16.85	17.3	16.8	20.7056	20.5722	21.6444	21.3778	28.5	28.5667
28/6/2007	17.5	18	12.8	14.1	20.5	20.6	17.9	17.9	17.3389	17.1333	16.6	17	20.3778	20.6056	21.3278	21.6833	27.9667	29.1444
29/6/2007	18.5	18.7	14.2	15.1	21.6	21.4	18.4	18.3	18.4222	17.6	17.5	17.5	21.1778	20.7167	21.9722	#N/A	28.9889	28.9333
30/6/2007	19.2	18.1	15.1	14.5	22.6	20.8	19.2	18.4	19.8444	17.5111	18.4	17.1	22.4889	20.5667	23.4	#N/A	30.5889	28.1556
1/7/2007	19.2	18.9	15.2	15.3	22.5	21.8	19.3	19.1	19.8722	18	18.7	17.7	22.5333	20.6556	24	20.9167	31.1444	27.3
2/7/2007	18.1	20.2	14.1	16.1	21.2	23.2	18.6	19.8	19.0167	18.9	17.8	18.7	22.4556	21.4278	24.0889	21.8611	31.1444	28.6667
3/7/2007	17.7	20.6	14	17	20.7	23.7	18.2	20.6	18.1611	19.5389	17.4	19.1	22.0278	21.8889	23.1444	22.5667	29.7222	29.6
4/7/2007	18.9	20.4	15.5	16.7	21.8	23.3	18.9	20.4	18.7944	19.6833	18.1	19.2	21.9667	22.4333	22.8111	23.0389	29.2778	30.2556
5/7/2007	19.6	19.3	16.3	15.8	22.4	22.1	19.7	20	19.6278	18.9889	18.7	18.1	22.5	21.9778	22.8944	22.5889	30.0222	29.6333
6/7/2007	19.7	19.5	16.2	16.5	22.7	22.4	20.1	19.7	19.5444	18.9944	18.6	18.3	22.2833	21.4333	23.2833	22.1667	30.0444	29.0556
7/7/2007	19.1	19.7	15.9	16.8	22.2	22.7	19.7	20	19.25	19.5056	18.1	19.1	22.3667	22.45	23.0833	22.8333	30.1667	29.9667
8/7/2007	20.1	20.3	16.6	17.1	22.8	23.2	20.4	20.5	19.6722	19.9833	19	19.8	22.9667	22.55	23.4	23.0611	30.4333	29.9444
9/7/2007	21	21.2	17.3	18.1	23.6	23.9	21.2	21.6	20.2278	20.4556	19.5	20.4	23.25	23.1944	23.7	23.8722	30.7	31.0222
10/7/2007	19.7	20.5	16.3	17.9	22.5	23.4	20.2	21.6	20.0889	20.4444	18.9	20.1	23.5222	23.4	24.0167	24.0056	30.7889	31.0111
11/7/2007	18.8	20.4	15	17.4	21.9	23.2	19.7	21.3	19.3611	20.6333	18.2	19.7	22.85	23.8778	23.3889	24.3778	30.1111	31.1
12/7/2007	18.9	19.9	15.4	16.3	22	22.6	19.5	20.9	19.1556	19.8722	18.4	18.9	22.2222	23.1056	22.9167	23.7722	29.7444	30.6
13/7/2007	19.9	20.9	16.6	17.3	22.9	23.3	20.5	21.4	19.8611	20.2278	19	19.6	22.6167	23.1833	23.4611	23.3111	30.0778	30.0778
14/7/2007	20.5	20.7	17.3	17.2	23.5	23.3	21.3	21.3	20.2611	20.7	19.5	19.5	23.0944	23.7667	23.3	24.0278	30.0222	31.1778
15/7/2007	20.8	19.2	17.6	15.9	23.6	21.9	21.5	20.4	20.7389	19.6611	19.7	18.7	23.6389	23.0944	23.5444	23.8889	30.4111	30.7
16/7/2007	21.2	19.5	18.1	16.6	24	22.3	22.1	20.8	21.3889	19.8056	20.4	19.2	24.1667	23.1389	24.6333	23.7	31.7333	30.6667
17/7/2007	21.1	20.4	18.1	17.8	24	23.3	22.3	21.4	21.1444	20.2389	20.5	19.7	23.9333	23.2667	24.3	23.6222	31.4	30.5444
18/7/2007	22	20.3	19.1	17.8	24.8	23.1	22.8	21.5	21.6556	20.0444	20.8	19.6	24.3944	23.3389	24.3111	23.6556	31.4	30.1889
19/7/2007	21.2	19.8	17.9	17.4	24.2	22.6	22.3	21.4	21.1111	19.2444	20.2	19.1	23.9111	22.4111	23.6444	22.65	30.3333	29.4889
20/7/2007	21	19.8	17.8	16.5	24	22.6	22	21.4	20.7833	19.5333	20.1	18.8	23.4889	22.5889	23.2278	22.1778	29.6444	29.0778
21/7/2007	20.6	19.9	17.1	16	23.3	22.9	21.9	20.8	20.6833	19.3944	19.7	18.9	23.5056	22.1944	23.6944	22.4333	30.3333	29.2444
22/7/2007	20.4	20.5	16.8	16.9	23.3	23.2	21.5	21.3	20.2889	20.05	19.4	19.1	23.2333	22.8889	23.3	23.6389	30.2	30.7556
23/7/2007	21	20.8	17.4	17.7	23.7	23.5	21.8	21.7	21.0278	20.2556	20	19.6	23.7056	23.2444	23.7444	23.9167	30.6667	30.8778
24/7/2007	20.1	21.2	17	18.5	22.8	24.1	21.1	22.4	20.9056	20.1889	19.6	20	24.1222	23.5944	24.3111	23.8778	31.3333	30.7444
25/7/2007	20.3	22.4	17.3	19.7	23.3	25.3	21.5	23.2	21.3333	21.2667	19.9	21	24.0833	23.9944	24.3	23.8889	31.3778	31.0111
26/7/2007	21.5	22.1	18.1	19.3	24.2	25.3	22.2	23.3	21.7778	21.7056	20.4	21.1	24.4	24.1222	24.6111	23.9667	32.0444	30.9889
27/7/2007	21.1	22.3	18.1	19	23.6	25.1	21.7	23.4	21.6667	21.5111	20.3	21	24.2556	24.05	24.7444	23.7722	31.9333	30.7444
28/7/2007	20.4	22.9	17.6	19.4	22.8	25.8	21.5	23.9	21.3111	21.7611	20	21.2	24.4944	24.2333	25.0167	24.2611	32.1	31.2
29/7/2007	20.1	22.7	17.4	19.1	22.4	25.7	21.3	23.4	20.8944	22.0667	19.4	21.2	24.05	24.5722	24.5556	24.85	31.7333	32.0111
30/7/2007	21.1	22.4	18.2	18.9	23.4	25.5	21.8	23.1	21.0833	21.9556	20	21.1	24.2222	24.8667	24.5056	#N/A	31.5	32.5556
1/8/2007	22.1	22.6	18.7	19.1	25.2	25.6	22.6	23.5	21.7389	22.5056	20.7	21.3	24.3056	25.3667	24.4556	25.8833	31.4556	32.9444
2/8/2007	22.1	21.9	18.9	19	25	24.9	22.8	23	21.2889	22.6444	20.9	21	24.0389	25.7444	24.3056	26.2167	30.9778	33.3111
3/8/2007	22.9	20.7	19.7	17.5	26.1	23.6	23.6	22.2	22.1389	21.9556	21.3	20.2	24.7389	25.3778	24.5	25.6889	31.4556	32.8667
4/8/2007	22.8	20.4	20.1	16.9	26.4	23.1	23.3	21.8	22.6389	21.45	21.7	19.7	25.1611	24.7389	24.9944	25.3778	31.9778	32.1778
5/8/2007	22.2	21	19.8	17.6	25.3	23.8	23.3	22	22.7778	21.1889	21.4	19.8	25.6889	24.1833	25.4278	24.8278	32.5889	31.5111
6/8/2007	20.5	21.8	18.3	19.3	23.8	24.9	22	22.6	21.95	22.4556	20.3	20.9	25.15	25.4389	25.2111	25.45	32.3333	32.3889
7/8/2007	19.7	21.8	17.1	19.2	22.8	24.7	21.2	22.8	20.4444	22.8333	19.3	21.3	23.75	26	23.9056	26.0167	31.2	33.3222
8/8/2007	20.9	21.2	18.1	17.8	23.6	24.1	21.9	22.2	20.7444	21.9333	19.7	20.3	23.9	25.2	23.7611	25.3667	30.8222	32.3
9/8/2007	21.8	20.3	19.4	17.3	25.1	23.2	22.8	21.3	21.7889	20.95	20.9	19.6	24.2778	24.4722	24.1889	24.7278	31.1556	32.0111
10/8/2007	22	20	19.8	17.5	25	22.9	22.6	21.3	21.7667	20.7778	21.4	19.2	24.8056	24.4556	24.8389	24.7889	31.6889	31.6222
11/8/2007	22.6	21.2	20.1	18.7	25.4	23.9	23.1	22.2	22.3111	21.1333	21.3	20.1	25.0667	24.7389	24.8556	24.8944	31.9222	32.1333
12/8/2007	22.6	21.6	20.4	19.1	25.7	24.5	23.2	22.4	22.7889	21.6944	21.6	20.7	25.4944	24.9278	25.3889	25.1	32.9	32.1778
13/8/2007	22.2	20.7	20	17.8	25	23.7	23.6	21.9	22.0056	21.0667	21.1	20	25.1889	24.5833	24.7889	24.9833	31.8	31.8444
14/8/2007	22	20.7	19.6	18	25	23.7	23	21.5	21.3333	21.1389	20.8	19.6	24.5	24.5722	24.6722	24.8944	31.8778	31.9667
15/8/2007	21.5	20.5	19.1	17.4	24.7	23.7	22.9	21.4	21.1389	21.3	20.5	19.7	24.2944	24.8667	24.3056	25.3444	31.5444	32.4778
16/8/2007	21.5	19.7	19.4	16.9	24.7	23	22.8	21	21.4611	21.2278	21	19.2	24.4444	24.7222	24.3222	25.0556	31.8222	32.1889
17/8/2007	21.6	19.6	19.2	17.4	24.8	22.8	22.8	21	21.8611	20.8722	20.8	19.3	24.8111	24.7	24.7333	24.9278	31.9333	31.9
18/8/2007	20.7	19.1	18.2	17	23.8	22.5	22.4	20.7	21.5778	20.2278	20.2	18.9	24.95	23.9	24.7667	24.2056	31.9444	31.0667
19/8/2007	21.2	20.5	18.5	18.3	24.8	23.7	22.5	21.4	21.65	20.1611	20.5	19.4	24.9722	23.5333	24.4889	23.7611	31.6	30.5222
20/8/2007	21.4	21.5	18.2	19	24.5	24.8	22.4	22	21.8	21.1167	20.4	20.1	25.4056	24.3389	25.1167	24.3667	32.5	31.5556
21/8/2007	19.5	21.3	16.2	18.8	22.3	24.3	21.3	21.7	20.7444	21.3111	19.2	20.3	24.6833	24.8167	24.8444	24.9611	31.7	31.9222
22/8/2007	17.3	19.6	14.4	17.1	20.5	22.7	19.5	20.9	18.9333	20.5889	17.3	19	22.9833	24.1333	23.2111	24.5	29.6222	31.4556
23/8/2007	18.5	18.9	16.1	16.8	22.1	22.4	20	20.3	18.9667	19.8278	17.9	18.4	22.1611	23.2167	22.7111	23.9111	29.8667	30.7111
24/8/2007	19.9	19.6	17.5	17.1	23.9	23	21	20.7	19.8778	20.1444	18.6	19.1	22.6944	23.5444	23.0833	24.0778	30.0889	30.8667
25/8/2007	19.6	19.1	17.1	16.3	22.9	22.5	21	20.2	20.4833	19.8278	18.9	18.8	23.7111	23.3278	23.7389	23.3833	30.8889	30.1111
26/8/2007	18.9	18.5	15.9	15.1	21.9	21.9	20.2	19.7	19.1889	19.2167	18.1	17.9	23.3	22.75	23.2222	22.6722	30.1667	29.3222
27/8/2007	18.5	17.8	15.3	14.4	21.8	21.5	19.9	18.7	18.8611	18.3389	17.6	17.2	22.6056	21.9222	22.6944	22.1944	29.4	28.9778
28/8/2007	18	18.4	14.4	14.7	21.5	21.8	19.3	19.2	18.25	18.4056	17.6	17.5	22.2056	21.4611	22.5444	22.3556	28.8778	29.4778
29/8/2007	18	18.5	14.8	15.1	21.4	21.6	18.8	19.2	18.2333	18.5944	17.4	17.5	22.0111	21.9278	22.3778	23.0722	29.3444	30.3111
30/8/2007	19	18.3	15.8	15.2	22	21	19.2	19.3	18.9056	18.1111	17.8	17.3	22.3111	21.7278	22.4389	#N/A	29.2	29.7778
1/9/2007	18.5	18.3	14.6	15.3	21.4	21.1	19	18.6	18.5278	18.4667	17.5	17.7	22.1667	21.8389	22.4111	22.5333	28.8222	30.0111
2/9/2007	16.3	18.3	12.7	15.8	19.6	21.4	17	18.4	17.2889	18.9556	15.8	17.9	20.75	22.4278	21.9222	23.2889	28.7778	30.9778
3/9/2007	15.4	18.8	11.5	16	18.9	21.5	16	19.2	16.5667	18.8444	15.2	18.2	20.4889	22.6667	21.3444	23.2889	28.4556	30.4222
4/9/2007	15.5	20.1	12.2	17.5	19.1	22.9	16.1	19.7	16.6	20.1889	15.4	18.8	20.3611	23.55	21.4389	23.0278	28.6556	30.4111
5/9/2007	17.2	18.1	13.4	14.8	20.3	20.6	17	18.6	17.2278	18.9944	16.2	17.6	21	23.1833	21.5722	23.2944	28.6667	30.4889
6/9/2007	18.1	16.3	14.2	12.7	20.7	19.2	17.4	17.1	17.9722	16.2444	16.9	15.6	21.6056	20.9278	21.8833	21.4444	29.0889	28.5444
7/9/2007	17	17.2	13.6	14.7	19.8	20.3	16.9	17.5	17.5611	16.8389	16.4	16	21.2056	20.2611	22.0111	21.1833	29.3778	27.8333
8/9/2007	17.1	18.3	13.7	15.7	19.8	21.5	16.9	18.6	17.8056	17.9222	16.5	16.8	21.3944	21.4389	21.9778	22.15	29.3222	29.2333
9/9/2007	16.5	18.6	12.4	15.7	19.2	21.6	16.5	18.9	17.8111	18.5611	15.9	17.8	21.6722	22.4333	22.2278	23.2056	29.0333	30.3111
10/9/2007	15.6	18.7	12	15.7	18.2	21.5	15.6	19	16.7333	18.8722	15.5	17.9	20.8944	22.6	22.0389	22.7722	29.2556	29.9111
11/9/2007	16.6	18.6	13.8	15.2	19.4	21.3	16.2	18.8	17.1389	18.6556	15.9	17.8	20.85	22.4556	22.1444	23.0333	29.5333	30.1111
12/9/2007	18.9	18.7	16.3	15.7	21.5	21.7	18.3	18.9	18.3056	18.4056	17.8	17.8	21.9111	22.2722	22.4111	22.5056	29.7889	29.9778
13/9/2007	19.4	19.5	16.8	16.1	22	22.1	18.8	19.6	19.15	18.8556	18.5	18.1	22.0222	22.5111	22.6278	22.7278	30.4111	29.9111
14/9/2007	19.1	19.2	16.3	15.4	21.4	21.7	18.6	19.5	18.7611	18.3944	17.6	17.9	21.7333	21.7611	22.7722	21.8278	30.5667	29.1667
15/9/2007	18.2	19.4	15.1	16	20.4	22.1	18.2	19	17.6778	18.1111	16.9	17.7	21.3667	21.3944	22.6	21.65	30.0889	28.8889
16/9/2007	18.1	18.6	14.8	15.6	20.2	21.6	17.8	18.8	17.75	17.4278	16.8	17	21.5889	20.9389	22.9833	21.5722	31.0111	28.5
17/9/2007	17.3	18.5	13.9	15.1	19.8	21.5	17.9	19.1	17.1333	17.25	16	16.7	21.2056	20.9944	22.5167	21.2111	29.7556	28.0333
18/9/2007	17.3	19.3	13.8	15.7	19.6	22	17.8	19.5	16.4833	17.8444	15.9	17.1	20.6611	21.5056	21.5444	21.5556	28.2667	28.0111
19/9/2007	18.2	19.3	14.6	15.6	21.1	21.9	18.4	19.8	16.8333	17.7611	16.5	17.2	20.8833	21.2667	21.4722	21.3667	28.1	27.8333
20/9/2007	18.9	18.7	15.3	14.7	21.4	21.3	19.2	19.3	17.1333	16.6	17	16.5	21.1333	20.2611	21.4778	20.6833	28.0778	27.4556
21/9/2007	19.4	17.8	15.9	13.9	22	20.5	19.3	18.5	17.1889	16.0444	17.4	15.5	21.5278	19.8833	21.5333	20.2222	28.5556	27.2778
22/9/2007	19.5	17.8	16	13.7	22	20.6	19.6	18.1	17.5444	15.9	17.4	16	21.7889	19.0833	21.9667	20.3667	29.4333	27.2444
23/9/2007	19.1	17.8	15.6	14	21.3	20.8	19.3	18.4	16.9667	16.4111	17.5	16.5	21.2167	20.0722	21.6333	20.6556	28.9	27.4222
24/9/2007	19	17.2	15.1	13.3	21.6	20.3	19.7	17.9	17.1111	16.4111	16.9	16.4	21.0833	20.2	21.3222	20.6167	28.3222	27.9222
25/9/2007	18	16	14	11.2	20.5	19	18.4	17	16.6389	15.5333	16.4	15.3	20.6444	19.6333	21.2833	20.2333	28	26.7778
26/9/2007	16.6	15	12.8	9.6	19	17.4	17.9	15.7	15.8	14.45	15.4	14	19.8944	18.4167	20.1333	19.6944	26.2	26.0889
27/9/2007	17.1	14.1	12.9	9.1	19.6	16.6	18.3	14.6	16.6111	13.0722	16	13.2	20.3611	17.1556	20.4	18.9556	26.6667	25.4333
28/9/2007	15.5	14.1	10.4	9.4	18.2	16.5	16.8	14.4	15.1444	13.2944	14.4	13.1	19.0667	17.0833	19.75	18.5667	25.6444	25.0444
29/9/2007	14.1	14.9	9.3	10.3	17	17.6	15.1	15	14.3556	14.1722	13.7	14.4	18.4333	17.6889	19.3611	#N/A	25.3556	26.2667
30/9/2007	14.5	14.7	10	10.9	17.4	17.4	15.3	14.9	15.1278	13.9944	14.4	13.8	19.3333	17.8111	19.95	#N/A	26.2667	25.5889
1/10/2007	13.7	14.7	8.6	11.2	16.4	17.5	14.8	15.3	13.8556	13.95	13	13.3	18.6111	17.8111	19.2889	18.2667	25.4889	24.5
2/10/2007	12.8	15.1	7.6	11.4	15.7	17.7	13.4	15.7	13.2722	14.1444	12.3	14.2	17.4111	17.7167	18.4722	18.7056	24.5333	24.8444
3/10/2007	13.1	15.5	8.5	12.3	15.7	18.1	13.2	16.2	12.7833	14.1667	12.4	14.4	17.1944	17.7833	18.2167	19.2222	24.2778	25.6111
4/10/2007	14	15.8	9	12.1	16.7	18.1	14.2	16.1	13.9944	14.2167	13	14	17.7444	17.4611	18.4833	19.5778	24.4667	26.1778
5/10/2007	13.2	15.2	8.7	11.7	15.9	17.9	13.4	16	13.7722	14.1889	12.8	14	17.6222	17.6	18.2889	19.3111	24.2667	26.0778
6/10/2007	12.3	15.4	7.8	11.4	14.6	18.1	12.5	15.9	12.8333	14.2167	11.6	13.8	16.9333	17.5333	17.9722	18.8556	23.4444	25.5778
7/10/2007	11.3	15.1	7.3	10.5	13.4	17.5	11.6	15.4	12.0389	13.2389	11	13.6	15.8278	16.9	17.3611	18.2111	22.9778	24.6
8/10/2007	11.7	15.2	8.4	10.7	14.7	18	12.3	15.7	12.05	13.9722	11.4	13.9	15.4722	16.7056	17.0889	18.0667	23.2667	24.5111
9/10/2007	13.5	14.9	9.9	10.2	15.9	17.5	12.9	15.5	13.0611	13.8056	12.4	13.8	16.3167	16.8944	18.0056	18.5611	24.3667	25.3333
10/10/2007	13.3	14.8	9.2	9.9	15.5	17.3	12.8	15.5	13.1333	13.5778	12.1	13.8	16.6667	16.9611	18.1944	18.1389	24.6778	24.8333
11/10/2007	12.8	14.2	8.9	9.3	15	16.4	12.4	15.2	12.6556	13.1667	11.6	13	16.3722	16.7556	17.9222	18.0722	24.5667	24.6667
12/10/2007	13.2	13.1	9.2	8.6	15.4	15.7	12.8	14.3	12.4222	11.8722	12.1	11.8	16.4056	15.5722	18.3056	16.55	25.1333	23.2889
13/10/2007	12.8	13.6	9	8.9	15.3	16.1	12.4	13.9	11.9056	12.9056	11.7	12.3	15.3	16.2056	17.3667	16.5944	23.9333	23.0556
14/10/2007	12.9	12.5	8.8	7.6	15.2	14.7	13.1	13.1	11.8167	11.9	11.3	11.6	15.1722	15.8444	17.2167	17.0556	23.9667	23.2556
15/10/2007	11.8	12.8	7.9	8.5	14.5	15.4	12.4	13.2	10.6889	12	10.3	11.8	14.3167	15.5444	15.8333	17.1611	21.7667	23.0222
16/10/2007	12.4	14	8.5	8.9	14.5	16.4	12.2	14.2	11.2333	12.8722	10.8	12.4	14.3333	15.9389	15.4667	17.45	21.2667	23.6556
17/10/2007	12.3	13.1	8	7.7	14.7	15.6	12	13.7	12.1778	12.6889	11	12.2	15.3	15.9222	16.85	17.6611	22.8778	23.8889
18/10/2007	10.8	12.2	6.5	6.6	13.2	14.7	11.1	12.5	10.7944	11.2611	10.3	11.2	14.1667	14.6333	16.1778	16.3667	22.2333	22.3
19/10/2007	10.3	11.6	5.6	6.8	12.6	14.4	10.6	12.1	10.1778	11.2833	9.8	11	13.7667	14.3111	15.2389	16.2556	21	22.2444
20/10/2007	10.3	12.3	5.7	7.2	12.8	14.9	10.4	12.7	10.15	11.7222	9.5	11.5	13.1722	14.0667	15.1778	16.4722	20.9667	22.9111
21/10/2007	10.9	10.9	6.8	6.5	13.1	13.4	10.6	11.3	10.25	10.9889	9.9	10.6	12.9667	13.5111	15.1167	15.9389	21.2444	22.4889
22/10/2007	12.5	10.1	8.4	6.1	14.4	12.6	11.8	10.7	11.4389	9.69444	11.3	9.9	13.5722	12.5722	16.2444	15.3111	23.0222	21.9778
23/10/2007	11.7	10.4	7.2	6.6	13.4	12.7	11.4	10.8	11.3	9.71111	10.7	9.6	14.4944	12.8222	16.5889	15.3111	22.9889	21.7111
24/10/2007	10.6	10.2	6	7.4	12.8	12.6	10.6	10.7	9.81111	9.96111	9.5	10.1	13.2833	12.8278	14.9778	16.1	21.1444	22.5333
25/10/2007	11	10.8	7.5	7.8	13.3	12.8	10.7	11.1	9.87222	10.2611	9.9	9.9	12.9556	13.1611	15.1444	15.9167	21.5444	22.1667
26/10/2007	11.6	10.2	8.4	6.4	13.5	12.1	10.9	10.4	10.2667	9.88889	10.4	9.3	13.1333	12.6222	15.9333	15.2833	22.4	21.8556
27/10/2007	11.3	8.8	8.1	5.1	13.5	10.8	11.1	9.1	10.0167	8.36667	10.3	7.7	12.8167	11.7111	15.3778	13.9444	21.8889	20.1333
28/10/2007	10.6	9.1	7.5	5.5	12.8	11.3	10.8	9.4	10.1	8.52222	10	8.4	12.7111	11.0111	15.4	13.7	21.6333	20.1444
29/10/2007	10.4	9.7	7.7	6.4	12.2	12	10.7	9.8	9.65	8.72222	9.7	9	12.7722	11.8167	15.1222	13.9444	20.9778	20.1444
30/10/2007	11.4	9.6	8.3	6.3	13.2	11.7	11.4	9.6	10.0111	8.72778	10.2	8.8	12.4444	11.65	15.1611	#N/A	21.6556	20.7444
1/11/2007	10.9	8.6	7.8	4	12.7	10.6	10.9	8.7	9.07222	8.04444	9.4	7.7	11.8778	11.3611	14.4556	13.7389	20.4222	19.4
2/11/2007	11.1	8	7.4	3.6	13.2	10.1	10.9	8.2	9.46111	7.80556	9.4	7.7	12.25	10.6889	14.55	13.4833	20.5444	19.2556
3/11/2007	10.9	8.1	6.7	3.7	12.6	10.1	10.8	8.3	9.72222	7.56667	9.8	7.6	12.6889	10.3	14.6833	13.2	20.6	18.9222
4/11/2007	10.4	8	6.6	3.7	12.1	9.9	10.5	8.3	9.73333	7.19444	9.7	7.3	12.6389	9.91111	14.8778	12.5	20.6333	18.3333
5/11/2007	10.5	7.3	6	3.2	12	9.2	10.2	7.5	9.83333	7.18333	9.7	7	12.4722	10.1722	15.1	12.3278	21.1333	18.1333
6/11/2007	7.8	7.6	3.2	3.5	9.8	9.4	8.9	7.8	7.41667	7.4	7.7	7.2	10.4833	10.0056	13.4222	12.3778	19.2333	18.1
7/11/2007	6.2	6.9	2.1	2.7	8.3	8.9	7.1	7.3	5.97222	6.72222	5.8	6.5	8.50556	9.89444	12.2389	12.2333	18.0667	18.1222
8/11/2007	6.6	5.7	3.9	2.4	8.9	7.5	7.6	6.5	7.10556	5.41667	7	5.3	9.51111	8.51667	12.6222	11.3778	18.4333	17.2889
9/11/2007	8.6	8	4	3.8	10.1	9.2	8.8	7.5	8.25	6.75556	7.8	7	11.0444	8.99444	13.4722	11.8389	19	18.0222
10/11/2007	7.5	7.8	3	3.2	9.3	9.3	8	7.9	7.48889	7.43333	7.2	7.5	10.1444	9.63333	13.3167	13.0944	18.8667	18.8333
11/11/2007	7.7	6.2	3.1	2.8	9.1	8.5	8	7.1	7.28333	5.98889	7.7	6.2	9.60556	8.42222	12.9944	12.25	18.5333	18.1778
12/11/2007	6.4	8.1	2.9	3.6	7.7	10	6.9	7.8	5.74444	7.47778	6.6	7.6	8.33889	9.31111	12.3111	12.9944	18.2	18.8444
13/11/2007	5.3	6.1	1.8	1	6.9	7.8	6	6.7	4.79444	5.95556	5.1	6.2	6.72778	9.01667	10.4389	11.7278	16.3556	17.2778
14/11/2007	4.8	4.9	2.2	0.4	6.7	6.9	5.9	5.7	5.24444	4.48333	5.3	4.9	7.61111	6.78889	10.5333	10.3278	15.8778	15.9667
15/11/2007	4.5	4.6	1.6	0.6	6.2	6.5	5.6	5.5	5	4.05556	4.9	4.6	7.47222	6.23889	10.7833	9.74444	16.0667	15.7333
16/11/2007	5.2	3	1.5	-0.2	6.8	4.9	5.4	4	5.14444	3.33889	5.4	3.2	7.22778	5.39444	11.0556	9.32222	16.0889	14.8
17/11/2007	5.8	4.2	1.8	0.8	7.4	6	6	4.5	5.68889	3.27222	5.9	3.8	7.36111	5.12778	12.0111	9.2	17.6333	15.6
18/11/2007	4.6	4.5	0.4	0.8	5.9	6.2	5	4.9	4.97778	3.95	4.6	4.2	7.04444	6.58333	11.35	9.70556	16.8333	14.8667
19/11/2007	4	3	-0.1	-1.1	6	4.9	4.8	4.2	4.14444	2.87778	4.3	2.9	6.36667	5.48889	10.1611	8.63333	15.7111	13.5
20/11/2007	4.3	2.8	0.9	-0.6	5.7	4.5	4.7	3.9	4.51667	3.31111	5	3.2	6.13333	5.86111	10.2111	8.72778	15.9222	14.1444
21/11/2007	4.4	2.9	0.9	0.2	5.6	4.8	4.7	3.9	4.54444	2.79444	4.6	3.5	6.47222	4.83889	10.4167	8.92222	15.5667	14.5111
22/11/2007	4.8	4.1	1.8	1.8	6.7	5.5	5.1	4.3	4.64444	3.9	4.8	4.5	6.36667	5.24444	10.0278	9.82778	15.4	15.5556
23/11/2007	5.2	5.2	1.8	2.1	6.5	6.3	5.2	5.2	5.21667	4.17778	5.3	4.6	7.06111	5.06667	11.0556	9.66667	16.4667	15.2778
24/11/2007	4.5	5.3	1.7	2.1	6.1	6.7	5.2	5.5	4.65	4.88333	4.9	4.8	6.66667	6.41667	10.7056	10.1667	15.9222	15.6778
25/11/2007	4.8	4.6	2.3	1.3	5.9	6	5.1	4.7	5.16111	4.41667	5.5	4.4	7.02222	5.85	11.4111	9.58333	16.7556	15.1333
26/11/2007	4.9	5	3.4	0.8	5.7	6.4	5.3	5.2	4.61111	4.50556	5.4	5	6.43889	6.61667	11.1167	9.44444	16.5667	15.1667
27/11/2007	6.6	4	4.7	1.1	7.4	5.6	6.3	4.4	5.62778	3.72222	6.4	4.1	6.55	5.20556	11.2556	9.27222	17.6444	15.2444
28/11/2007	6.6	5.2	3.7	2	7.6	6.4	6.7	5.2	5.92222	4.18333	6.5	5.1	7.06667	5.30556	12.1611	9.89444	18.0667	15.4556
29/11/2007	5.6	5.9	3.1	2.3	6.7	7.1	5.6	6.1	5.41667	5.39444	6	5.4	6.53889	6.24444	11.7722	#N/A	17.3778	15.7444
30/11/2007	5.7	5.1	3.3	1.3	6.7	6.3	6	5.6	5.42778	5.05	6	4.8	7.13333	5.76667	11.5222	#N/A	17.0333	15.5
1/12/2007	5	3.4	1.3	0.5	5.9	4.8	5.4	4.2	4.62778	3.5	4.7	3.5	6.63333	4.66111	10.5056	8.75556	15.7	14.2222
2/12/2007	4.2	4.3	1.3	1.1	5.8	5.6	4.7	4.6	3.94444	3.88333	4.5	3.9	6.00556	5.26111	9.92222	9.3	15.3222	14.6889
3/12/2007	3.6	3.6	1.4	0.2	4.9	5	4.1	4.1	2.92778	2.76111	3.9	3.4	5.12222	4.11111	9.23889	8.88889	15.1889	14.4667
4/12/2007	4.1	4.5	2.3	1.9	5.3	5.2	4.7	4.3	3.5	3.62222	4.4	4	4.93889	4.57778	9.57222	9.23333	15.8667	15.0111
5/12/2007	3.9	5.5	2.7	3.2	5.1	6.2	4.3	5.5	3.20556	4.33333	4.3	5.1	5.13889	5.16667	9.03333	10.4	15.2778	15.8333
6/12/2007	3.8	5.3	2	2.4	4.6	5.8	4.4	5.3	3.13333	4.37778	4.2	5.1	4.97222	5.52778	9.51111	10.2611	15.3778	15.7333
7/12/2007	3	4.6	2.3	2	3.6	5.5	3.6	5	2.40556	3.76111	4	4.3	4.32222	5.09444	9.31667	9.88333	15.8556	15.5778
8/12/2007	2	5.2	1.5	2.1	2.5	6.6	3.2	5.3	1.63333	4.91667	3	5.2	3.45	5.94444	8.46667	10.7667	14.7444	16.5444
9/12/2007	1.6	4.2	0.5	1.5	2.3	5.9	2.5	4.8	1.32222	4.01111	2.3	4.5	2.77778	4.96667	7.72222	10.5444	13.8111	16
10/12/2007	2.2	4	1.2	1.7	2.5	5.1	2.7	4.3	1.72778	3.48889	3	4.4	3	4.65556	7.61111	9.33333	13.9222	15.6
11/12/2007	3	4.3	1.4	2	3.4	5	3	5	2.25556	3.10556	3	4.4	3.10556	4.13889	7.94444	9.14444	14.1	15.2778
12/12/2007	2.8	4.2	0.5	1.8	3.6	4.8	3.1	4.9	2.46667	3.62222	3.3	4.3	3.68889	4.97222	7.6	10.3389	13.1778	15.7333
13/12/2007	3.8	4.2	1.5	2.1	4.2	5.1	3.6	5	3.43889	3.28333	4.3	4.3	4.85556	3.96667	8.67778	9.48889	14.3444	15.1778
14/12/2007	3.1	5.5	1.1	3.2	3.7	6.4	3.7	5.6	2.94444	4.78889	3.7	5.4	4.14444	4.37778	8.28333	10.2278	14.1	16.2222
15/12/2007	3.1	6.2	0.3	3	3.5	6.8	3.4	6.5	2.81667	5.99444	3.3	6.3	3.97778	6.63889	8.17778	11.5444	13.8333	17.0111
16/12/2007	1.8	6.2	-1	2.1	2.6	7.1	2.6	6.1	1.43333	6.36111	1.5	6.3	3.38333	7.68889	6.77222	11.3944	12.2556	16.4444
17/12/2007	2.6	4.6	0.1	0.7	3.2	6.1	2.9	5.3	1.69444	4.40556	2.4	5.1	2.83333	6.04444	7.13889	9.86111	13.2333	15.2333
18/12/2007	3.1	4.7	0	1.1	4.2	6.1	3.1	5.4	2.73333	4.55556	2.8	5	3.88333	5.71667	8.28889	8.99444	13.9	15
19/12/2007	4.1	5.1	0.7	2	4.8	6	4.3	5.5	2.98889	4.31667	3.5	5.1	4.10556	5.26111	8.78333	10.2	14.2111	16.1778
20/12/2007	4.6	6	0.6	2.8	5.3	6.9	4.8	6	3.28889	5.16667	4.1	5	4.07222	6.01667	8.83333	11.1889	14.1889	16.8
21/12/2007	3.5	4.8	-1	1.4	4.9	6	4.2	5.4	4.17778	4.63333	3.7	4.7	5.70556	6.10556	8.8	10.4944	13.5556	15.6111
22/12/2007	1.7	3.8	-2.4	0.6	3.3	5.1	3	4.5	1.79444	3.78333	1.6	3.9	4.44444	5.71111	6.98889	9.82222	11.7444	15.3556
23/12/2007	2.7	5.2	-1.4	2.1	4.4	6.3	3.6	5.6	2.93333	4.77222	3.2	5.1	4.55	6.28333	7.89444	10.3833	13.3333	16.0444
24/12/2007	3.9	6.1	-0.2	3.3	5	7.3	4.3	6.3	3.7	6.50556	3.8	6.4	5.38333	7.88889	8.64444	11.8	14.0889	17.4667
25/12/2007	2.1	4.7	-2	2.1	4	5.4	3.8	5.1	2.27222	4.96111	2.2	5.1	4.28889	7.1	7.27222	10.6333	12.1778	16.2333
26/12/2007	2.2	3.4	-1.5	1.9	3.8	4.3	3.5	4.8	2.71667	3.2	2.8	3.4	4.47778	5.08889	8	9.20556	13.0333	14.8333
27/12/2007	3.8	3.8	1	1.6	5.3	4.7	4.4	5	3.08333	3.64444	3.3	3.7	4.18889	5.25556	8.55556	9.29444	14.3889	14.4333
28/12/2007	5.7	4	2	2	6.9	4.9	5.6	4.5	5.15556	4.41667	5.5	4.3	6.32222	6.03333	10.8167	10.0889	16.4222	15.2333
29/12/2007	4.9	3.5	0.9	1.1	6.4	4.2	5.5	4	4.73333	3.09444	4.7	3.8	5.82778	5.38889	10.2444	9.09444	15.8222	14.6667
30/12/2007	4.5	3.6	0.9	0.3	6	4.4	5.4	4	3.72778	3.23889	4.4	3.8	4.75556	5.42778	9.57778	#N/A	15.5333	14.4778
1/1/2008	4.7	4.3	1.7	1.8	6	4.6	5.4	4.7	4.75	3.15556	5.3	4.6	6.19444	4.22222	10.4444	9.71111	15.6222	15.5556
2/1/2008	5.4	5.4	2.9	2.2	6.1	6.3	6.1	5.8	5.23889	4.4	5.8	5.3	6.81667	4.59444	11.0278	10.1833	16.8667	16.5222
3/1/2008	4.5	3.4	1.5	-0.3	5.9	4.5	5.6	4.4	4.50556	2.85556	4.9	3.8	6.18333	4.31667	10.7778	7.71111	16.6111	13.5556
4/1/2008	4.3	1	1.8	-2.8	5.2	2.1	4.7	2.2	3.95556	0.833333	4.5	1.3	4.85556	2.62778	10.2667	6.22778	16.2889	11.4111
5/1/2008	4.7	1	1.8	-2.3	5.8	1.8	5.2	1.7	4.82778	0.266667	5.2	1.1	6.20556	2.05	10.9667	6.06111	16.9889	11.5333
6/1/2008	2.8	1.8	-0.2	-2.2	3.9	2.7	4.3	2.5	2.66111	1.08889	3	2	4.54444	3.46111	9.09444	6.74444	14.9	12.1222
7/1/2008	2.4	0.8	-0.3	-3.1	4.1	2.1	3.6	2	2.21667	0.888889	2.9	1	3.76111	2.60556	8.27778	6.14444	14.1333	10.8889
8/1/2008	3.4	1.6	0.8	-2.7	5	3.1	4.4	2.5	3.17778	1.91667	3.8	2	4.16667	3.93889	8.77222	7.64444	14.6889	12.1
9/1/2008	4.5	1.3	2.2	-2.7	5.9	3	5.1	2	4.05556	1.61667	5	1.9	5.66111	3.67778	9.60556	7.48889	15.4667	12.2111
10/1/2008	4.4	2	1.7	-1.8	5.7	3.4	4.6	2.6	4.65556	2.20556	4.6	2.6	6.05	3.22222	9.93889	7.49444	15.9667	13.1778
11/1/2008	4.4	3.1	1	-0.8	5.6	5	4.9	3.6	4.16111	3.00556	4.4	3.5	5.75556	3.76667	10.1389	8.15	15.8444	14.1222
12/1/2008	4.2	5.4	1.1	0.7	5.6	6.3	4.6	5	3.3	5.1	4.3	5.5	4.99444	5.9	9.51667	10.35	15.2222	15.9111
13/1/2008	5.3	3.8	2.3	0.5	6.3	4.8	5.6	3.9	4.67778	3.52778	5.5	4.1	6.37778	5.02222	10.7722	9.76111	16.3667	15.4889
14/1/2008	4.3	3.6	0.7	0.6	5.9	4.7	5.1	3.9	4.19444	2.86111	4.3	3.7	6.62222	4.19444	9.73889	9.13889	15.0111	15.2556
15/1/2008	2.9	3.4	-0.7	0	4.6	4.1	3.8	3.7	2.75556	2.48889	3	3	5.26667	4.19444	8.24444	9.01111	13.2	14.3778
16/1/2008	3.8	3.5	0.2	0	5.3	4.7	4.6	3.9	2.91667	2.27222	3.6	3.1	4.81667	3.87222	8.13889	9.10556	13.8667	14.7
17/1/2008	4.5	3.5	1.3	-0.6	5.6	5.2	5.4	3.7	3.90556	3.20556	4.8	3.4	5.77222	4.53333	8.97778	8.91111	14.6778	14.6222
18/1/2008	3.1	3.6	-0.2	0.1	5.1	5	4.3	3.7	3.43333	3.55556	3.3	4	6.86111	5.21111	9.23333	9.48889	14.5889	15.6
19/1/2008	3.3	5.6	-0.3	1.4	4.8	6.8	3.8	5.2	2.67222	5.76667	3.2	5.6	4.98889	7.28889	8.17778	10.7111	13.2111	16.6111
20/1/2008	4.5	4.4	1.4	0	6.2	5.8	5.1	4.7	4.22222	4.86111	4.3	4.4	6.42222	7.05	9.46111	10.6389	15.0667	16.2222
21/1/2008	4.8	3.5	2	-1.1	5.9	5	5.3	3.8	4.73889	3.56111	5	3.7	6.71111	5.72222	10.6722	8.87778	16.3	14.7444
22/1/2008	4.4	3.5	1.6	0.4	5.1	5.1	5.1	4.2	3.82778	3.37222	4.5	3.9	5.94444	5.27222	10.5278	8.85556	16.4111	15.0667
23/1/2008	4.3	5.1	1.6	2.1	5.2	6.6	4.8	5.3	3.53333	4.86111	3.9	5.4	4.9	5.31111	9.06111	10.6611	15.2444	17.0667
24/1/2008	5	5.3	1.7	1.9	6.1	6.7	5.7	5.3	4.12222	5.69444	4.7	5.5	6.05	6.72222	9.61111	11.6833	15.1222	17.4222
25/1/2008	4.5	4.9	1.6	1.3	5.8	6.3	5.3	5.2	4.3	5.25	4.8	5.2	5.72222	7.33889	9.96111	11.2833	15.7222	16.9111
26/1/2008	5.2	4.6	2.5	1.2	6.6	6.1	5.4	4.6	5.12222	4.72778	5.4	4.5	6.25556	6.26111	10.2944	10.5944	16.8	16.5222
27/1/2008	5.1	5.2	1.6	3	6.5	6.5	5.3	5.3	5.02778	5.05	4.9	5.1	6.37222	6.13889	10.45	11.0667	16.6556	17.5889
28/1/2008	5.2	5.5	1.5	2.7	6.8	7	5.4	5.6	4.67222	5.16111	5.3	5.3	6.13333	5.97778	10.4833	11.1278	16.7111	17.8778
29/1/2008	4.3	5.4	0.2	1.8	5.6	6.6	5	5.4	3.4	5.17778	4.3	5.1	5.19444	6.92778	9.45556	11.6167	15.2444	17.9333
30/1/2008	3.7	5.2	0.7	1.9	5.4	6.5	4.6	5.3	2.93889	5.31667	4.1	5.2	4.43333	7.66111	8.39444	#N/A	14.4889	17.6111
1/2/2008	3.8	3	0.8	-0.5	5.8	5	5	4	4.25556	3.57778	4.3	3.2	5.50556	5.98889	9.60556	9.26111	15.5444	15.5889
2/2/2008	4	3.1	0.7	-1	5.2	5.1	4.8	3.9	3.51111	3.17778	4.5	3	5.83889	5.30556	9.57222	8.63889	15.3	14.6778
3/2/2008	3.3	3.1	-0.9	-0.9	4.4	4.7	4.1	3.8	2.76667	3.05556	3.2	3.5	4.68333	6.21111	8.72778	8.86667	14.4111	14.8111
4/2/2008	2.9	2.6	-2.1	-0.2	4.1	4.3	3.8	3.4	1.94444	2.01667	2.9	3.4	4.38889	4.67778	8.38333	8.32222	13.8667	14.1333
5/2/2008	0.8	4.1	-3.4	2	3	5.7	2.6	4.5	1.38333	3.64444	1.6	4.5	4.15	6.12778	7.86111	9.47222	13.6333	15.9778
6/2/2008	1.7	5.2	-2.6	2	3.6	6.8	2.7	5.7	1.35556	4.53333	2.1	5.3	3.31111	6.81667	7.37222	10.3111	12.9889	16.6444
7/2/2008	3.3	5	-0.3	2.1	5.1	6.6	3.9	5.3	2.72222	4.98333	4.2	5.5	3.92778	7.02778	8.17222	11.0667	14.3222	17.4556
8/2/2008	4.6	4.7	0.8	1.7	5.9	6.4	4.8	5.1	3.45	4.28889	4.8	4.5	4.48333	6.66111	8.99444	10.5056	15.6111	16.8667
9/2/2008	4.3	4.8	0.1	0.2	5.5	6.7	4.8	5.1	3.93889	4.16667	4	4.7	5.17778	6.82222	9.07222	10.0667	15.2667	16.0667
10/2/2008	4.2	5.3	0.2	0.9	5.7	7.6	4.8	5.7	3.66667	5.18333	3.8	5.4	5.37778	7.32222	9.06111	10.15	15.4333	16.1444
11/2/2008	4.7	4.8	0.2	0.7	6.2	6.7	5.2	5.4	4.01667	5.3	4.4	5.3	5.70556	7.83889	9.55	10.4111	15.3889	15.9444
12/2/2008	6	5.2	1.6	0.7	8	7.3	6	5.9	5.81111	5	5.8	5	6.25	7.50556	10.2833	10.0611	16.6	15.5889
13/2/2008	6	4.8	1.7	0.7	8.3	6.6	6.3	5.5	6.52778	4.41667	6.1	4.8	7.76667	7.47778	11.1	9.92222	17.4333	15.1111
14/2/2008	5.3	3.9	0.3	0.5	7.6	5.8	5.7	5.2	5.86111	3.47222	5.5	4.2	7.92222	5.78889	10.5667	9.23333	16.3778	15.0333
15/2/2008	3.3	4.5	-2	0.7	5.9	6.7	4.8	5.7	3.68333	4.15556	3.5	4.2	6.55	6.35	8.84444	10.0111	14.2778	15.9111
16/2/2008	3.2	5.2	-1.7	0.8	5.9	7.5	4.3	6.3	3.38889	4.73333	3.6	4.6	5.53889	6.28333	8.67778	9.72778	14.5778	15.8111
17/2/2008	4.3	5	0.3	0.1	6.9	7.3	5.2	5.8	4.87222	5.2	4.6	4.7	6.85	7.34444	10.0278	10.8056	16.1889	17.0556
18/2/2008	5	4.7	0.7	0.4	8	7.2	6	6.1	5.60556	5.2	5.1	4.8	7.68889	7.84444	10.7333	10.7667	17.1111	16.8889
19/2/2008	4.7	5.3	-0.1	1.3	7.1	7.8	5.5	6.4	5.47778	5.51667	4.5	5.4	8.42778	8.53333	10.8056	10.5833	16.7111	16.7
20/2/2008	5.2	6.5	0	2	7.7	9	6	7.5	5.23333	6.47222	5	6.2	7.6	8.83333	10.3889	11.1778	16.2667	17.1889
21/2/2008	5.8	5.1	-0.1	0.1	7.9	7.5	6.3	6.7	6.02778	5.49444	5.6	4.8	8.24444	8.63333	10.6222	10.5944	16.2	15.9556
22/2/2008	3.6	3.6	-1.7	-1	6.2	6.5	5	5.6	4.01667	4.18333	3.6	3.8	7.06667	6.77222	9.55	9.31667	15.3111	15.5
23/2/2008	4.4	4.4	-0.3	0.2	7	6.7	5.5	5.9	3.98889	4.59444	4.5	5	5.9	6.72222	9.22222	9.88333	14.9333	16.6889
24/2/2008	4.4	6.1	-0.3	1.7	7	8.5	5.8	7.1	4.73333	6.04444	4.6	6.1	6.71667	7.97778	9.65556	11.7278	15.3444	17.9667
25/2/2008	4.7	6.3	0.7	2.1	7.8	8.9	6.1	7.4	5.05556	6.06667	5.2	6.5	6.73333	7.85	9.70556	11.9778	15.7778	18.0444
26/2/2008	5.8	6.2	1.2	1.9	9	8.5	7.3	7.1	5.44444	6.79444	5.9	6.5	7.77222	8.71667	10.2278	13.3111	16.1222	19.6111
27/2/2008	5.8	3.5	0.9	-1.2	8.6	5.9	6.9	5.6	5.77222	4.03333	5.4	3.7	7.75556	7.17222	10.3778	10.3278	16.3889	16.3111
28/2/2008	5.9	2.8	1.1	-1.5	8.6	5.7	7.1	4.9	6.27778	3.77778	5.9	3.2	8.16111	5.6	10.9889	#N/A	16.9889	15.4889
1/3/2008	6	3	1.9	-1.1	8.6	5.8	7.2	5	5.68889	3.37222	6.1	3.7	8.03889	5.51667	10.5333	9.07222	16.7667	15.1
2/3/2008	7	2.5	4.2	-1.2	9.6	5.5	8.2	4.5	6.16111	2.94444	7.1	3.3	8.00556	5.26667	10.3889	9.32778	17	14.9556
3/3/2008	6.7	4.4	3.3	1.2	9.5	6.7	8.4	5.7	6.05556	4.06667	6.5	4.8	8.14444	6.23889	10.8167	9.48333	17.7444	15.7
4/3/2008	5.9	6.8	1.4	3.1	8.5	9.1	7.8	7.8	4.93889	7.06667	5.9	6.8	7.73333	8.18889	10.6111	11.5056	16.5667	18.8
5/3/2008	4.6	5.5	0.1	1.4	7.3	8.1	6.9	7.1	4.58889	5.70556	4.6	5.8	7.07222	8.26667	10.1111	11.9611	16.3444	18.3556
6/3/2008	4.6	5.8	0.6	1.7	7.5	8.3	6.7	6.9	4.78333	6.15	5	6	7.28889	7.97222	9.98333	12.1389	15.8889	18.3333
7/3/2008	5.2	6.6	0.6	2.5	7.8	9.1	7	7.7	5.06111	6.78333	5.3	6.6	7.55556	8.73333	10.0944	12.8389	15.8222	19.3889
8/3/2008	5	6.6	0.5	2.3	7.3	8.9	7	7.5	4.07778	6.42778	5.3	6.9	6.54444	8.72222	9.12222	12.3722	14.9111	18.6111
9/3/2008	5.6	6.7	1.5	3	8.2	9.1	7.6	7.8	4.51111	6.82222	5.1	7.2	6.18333	9.03889	8.93333	12.4278	14.9333	19.2333
10/3/2008	5.5	6.6	1.6	2.3	8.2	9.1	7.5	8	5.87778	6.69444	5.7	6.6	8.13889	9.61667	10.6833	12.8611	16.5333	19.7111
11/3/2008	3.9	5.1	-0.4	1.3	6.5	7.5	6.1	6.4	3.72778	5.34444	4.2	5.9	6.51111	8.02222	9.37222	11.6833	15.2	17.9778
12/3/2008	5.1	6.5	0.7	3.2	7.5	8.8	6.5	7.8	5.02222	6.22222	5.4	7	6.87222	8.67222	10.1167	11.4111	16.5667	17.9111
13/3/2008	5.6	7.2	1	3.8	8.1	10.2	7	8.8	5.60556	7.43889	5.4	7.7	7.72222	9.27778	11.0611	12.1778	17.5	18.6778
14/3/2008	5.5	8.4	1.2	4.4	8.1	10.7	7	9.7	5.95556	8.11667	5.9	8.2	8.52778	9.97222	11.0444	13.8056	17.7111	20.8444
15/3/2008	5.8	7.8	1.6	3	8.4	10	7.6	9.2	6.02222	8.20556	6.2	7.8	8.56111	10.9944	10.8278	13.9778	16.7	20.6333
16/3/2008	6.9	7.3	2.3	2.6	9.3	9.6	8.1	8.5	7.23333	7.32778	7.3	7.3	10.0611	9.66111	12.0389	12.6333	18.0778	18.7
17/3/2008	6.3	8.4	1.8	4.3	8.7	10.7	7.8	9.6	6.63889	8.16667	6.7	8.2	8.85556	10	11.9222	13.0056	18.3556	19.4333
18/3/2008	6.4	8.3	1.4	3.8	8.6	11	7.8	10.2	6.14444	8.11111	6.5	8.2	8.47222	10.7333	11.95	12.4722	18.6556	18.6667
19/3/2008	6.6	7.4	1.4	3.5	8.8	10.4	8	9.4	6.08889	6.92222	6.6	7.4	8.6	9.55556	11.8889	11.3944	18.4222	17.5778
20/3/2008	6.8	8.4	2.4	4.8	9.4	11.6	8.6	10.3	6.72778	7.77222	7.3	8.3	9.81111	9.93333	11.8389	11.6611	18.2333	18.3333
21/3/2008	7.3	9.3	3.1	5.4	9.9	12.3	9	11.2	6.79444	9.33333	7.5	9.5	9.03333	11.1389	11.6722	12.9444	18.3111	19.7
22/3/2008	8.3	8.9	3.6	4.7	11.1	12.1	9.9	11	7.67222	9.08889	7.9	9	10.0722	11.1333	12.25	13.3056	18.8222	19.8444
23/3/2008	7.8	9.8	2.8	5.4	10.8	12.9	9.4	11.3	8.5	9.95	7.9	10	10.7222	12.45	12.3167	14.1556	18.6667	20.4333
24/3/2008	7	9.1	1.9	3.4	9.8	12	8.5	10.9	8.04444	9.92222	7	9	10.15	12.4722	12.2667	14.3611	17.8556	20.0778
25/3/2008	7	8.3	2.9	2.5	9.6	10.9	8.5	10	7.36667	8.85	7.2	8.2	9.91667	11.8389	11.9556	14.0111	18.2111	20.2778
26/3/2008	8.1	7.1	3.5	2	10.7	9.8	9.6	9.3	8.3	8.34444	8	7.3	10.3278	11.6	12.95	13.0444	19.3444	19.3444
27/3/2008	8.5	6.9	3.9	2.1	11.4	10.1	10.1	9.1	9.28889	7.70556	9	7.5	11.4111	10.8056	13.8722	12.9111	20.6	19.0444
28/3/2008	9.8	7.6	4.9	2.5	12.7	10.8	11.4	9.5	10.2667	7.93333	9.9	8	11.9667	10.4611	14.1889	13.5889	20.7333	19.7222
29/3/2008	8.5	8.4	3.1	3.9	11.3	11.3	10.4	10.2	10.0389	8.78889	8.6	8.6	12.3833	11.2722	14.7778	14.0889	21.1667	21.0222
30/3/2008	7.6	7.3	2.8	2.6	10.6	10.2	9.5	9.5	8.53889	8.72222	8.1	7.8	11.2222	11.6611	13.1667	#N/A	19.4333	21.0778
1/4/2008	6	6.7	-0.1	1.8	8.3	9.8	7.9	8.6	6.67222	7.42778	6.1	6.9	9.69444	10.4556	11.6278	12.7611	16.9778	19.4778
2/4/2008	6	6.4	0.2	1.5	8.9	9.4	7.7	8.3	6.56111	7.41111	6.6	7.3	9.57778	10.3389	11.4333	13.0111	16.9667	20.1889
3/4/2008	7	6.6	2	1.8	10.1	9.5	8.4	8.5	7.72222	7.16111	7.5	7	10.0778	10.3056	12.6667	12.9389	19.1333	19.4444
4/4/2008	8.2	7.6	3	2.7	11.2	10.4	9.9	9.4	8.78889	8.17778	8.3	7.8	11.1167	10.9722	13.4722	13.9889	19.7889	20.2222
5/4/2008	8.1	8.3	3.2	2.9	11	11	10	10.2	8.78333	8.63333	8.6	8.3	11.5	10.7056	13.5278	14.2389	19.8667	20.9667
6/4/2008	7	7.7	2.1	3	9.9	10.4	9.3	9.6	7.92222	8.52778	7.7	8.4	10.3111	11.1556	13.2611	13.7056	19.6222	20.5
7/4/2008	7.3	7.2	2.2	2.2	9.8	9.6	8.8	9.2	7.69444	7.65	7.6	7.6	10.2611	10.9278	12.8667	13.9667	19.6778	20.1111
8/4/2008	7	7.6	2.2	3.2	9.8	10.3	8.8	9.2	7.80556	7.67778	7.5	8.2	10.4	10.45	13.1333	13.1333	20.0333	19.4
9/4/2008	7.2	8.4	2.2	3.8	9.7	11.4	8.9	10.1	7.85	8.87222	7.6	9	10.5778	11.0611	13.5222	13.6278	20.1667	19.8667
10/4/2008	7.3	8.1	2.4	3.5	10.1	11	8.8	10.1	7.70556	9.12222	7.6	9.1	10.0111	12.1111	13	14.3222	19.8222	21.2222
11/4/2008	7.7	7.6	2.6	2.6	10.1	10.2	9	9.8	8.28889	8.83333	7.9	8.4	11.1333	11.4889	13.4611	14.5389	19.9	20.7778
12/4/2008	7.8	7.6	3	2.4	10.4	10.3	9.2	9.2	7.92222	7.96111	7.9	7.9	10.5167	10.3556	13.2444	13.3778	19.6889	19.6667
13/4/2008	7.6	9	2.9	4	10.6	11.4	9.3	10.1	7.78889	8.74444	7.9	9	10.3556	11.3722	13.15	14.4111	19.6111	21
14/4/2008	7.9	8.6	3	2.8	10.7	11	9.7	9.6	7.81667	8.60556	7.9	8.2	10.2	11.5722	12.9278	13.8722	19.5444	20.1778
15/4/2008	8.4	7.7	3.6	1.9	11.4	10.2	10.3	9.1	8.14444	8.56111	8.1	7.8	10.2333	11.4944	11.8889	14.0833	18.3556	20.2333
16/4/2008	9	7.7	4.1	2.3	11.9	10.3	10.8	8.9	8.60556	8.49444	8.9	7.9	11.2222	11.3667	13.25	13.6222	20.0667	19.8222
17/4/2008	9.2	8.3	4.2	3	12	10.9	10.9	9.9	8.93889	9.25556	8.7	8.4	11.3833	12.2556	13.6667	13.9167	20.2	20.0778
18/4/2008	8.6	8.1	3.6	3.5	11.3	10.8	10.8	9	9.04444	8.77222	8.5	8.4	11.1278	11.6333	13.4278	12.8	19.6222	18.1667
19/4/2008	8.8	8	3.9	3.6	11.6	10.9	10.5	9.3	9.57222	8.63889	9.3	8.2	12.3667	11.4722	14.7667	12.9889	21.1333	18.8556
20/4/2008	9.6	8.6	4.5	4.1	12.7	10.9	10.8	9.5	10.2111	9.16667	10	8.7	12.4167	12.1556	14.9222	14.3	21.7222	20.5778
21/4/2008	10.2	9	5.4	4.3	13.3	11.6	11.6	9.8	10.4778	8.87222	10.3	8.6	12.9722	11.8111	14.4833	13.7278	20.9889	20.4111
22/4/2008	9.7	9.3	4.9	4.8	13.2	12.3	11.7	10.4	10.05	9.61111	9.7	9.1	12.45	11.6556	14.5889	12.7444	21.0222	18.8889
23/4/2008	9.6	9.8	4.4	4.4	13	12.5	11.6	10.2	10.1278	9.42778	9.5	9.4	13.0389	11.6278	14.6278	13.0944	21.3556	19.4778
24/4/2008	10.1	9.3	5.2	4.3	13.3	12.6	11.8	10.6	10.45	9.03889	9.8	9.1	12.9833	11.4444	14.5167	12.9556	21.1	19.0111
25/4/2008	10.8	9	5.9	4.2	13.7	12.2	12.1	10.6	11	8.85556	10.3	8.9	13.35	11.4667	14.8222	13.1556	21.2889	19.1556
26/4/2008	10	9	5	4.1	13	12.2	11.8	10.3	11.2111	8.70556	10.3	8.7	13.75	11.45	15.5389	13.1056	22.0556	19.6889
27/4/2008	7.8	9.9	2.2	5.1	10.8	13	9.6	11.1	8.83889	9.61111	7.9	9.8	11.55	12.3056	13.6944	13.8278	19.3	20.8
28/4/2008	8.8	9.2	4.2	4.2	11.9	12	9.9	10.1	9.28333	9.52778	9.4	9.1	11.8056	12.6889	13.5722	14.4278	19.6556	21.4
29/4/2008	9.4	9	4.5	4.2	12.3	11.9	10.5	10.6	9.76667	9.35	9.5	9.5	12.4	12.2389	14.5167	#N/A	21.0444	21.0778
30/4/2008	8.4	10.3	3.1	5.1	11.2	13.1	9.8	11.4	8.88889	9.73889	8.2	10.2	11.2	12.8833	13.5111	#N/A	19.4667	20.4667
1/5/2008	9.2	10.2	4	5.1	11.9	12.9	10.2	11.3	9.53333	10.5667	9.2	10.1	11.8722	13.3278	13.9056	15.05	20.7556	21.3778
2/5/2008	10.2	8.7	5.1	3.6	12.9	11.6	10.9	10	10.7667	10.0111	10.2	9.2	13.3167	13.0056	15.4778	16.1389	21.6667	22.9
3/5/2008	11.1	8.6	6.5	3.3	14.2	11.3	12	9.3	11.9056	9.12778	11.2	8.9	14.4611	12.6833	16.7833	15.4	23.6	21.8667
4/5/2008	11.6	9.2	6.6	3.9	14.2	12.1	12.2	9.3	12.0056	9.37222	11.1	8.9	14.8889	12.0222	17.1333	14.8611	24.2333	21.4111
5/5/2008	11.1	9.6	5.9	4.8	13.7	12.9	11.4	9.9	11.4722	10.4722	11.1	9.8	13.8889	12.6667	16.4667	15.1722	23.4444	22.0889
6/5/2008	11	9.9	6.1	5.3	13.8	12.8	11.5	10.5	11.5056	10.3444	11.2	10.1	14.1111	13.3111	15.9778	15.6444	23.2222	22.0667
7/5/2008	11.3	11.4	6.4	6.8	14.1	14.1	11.7	11.5	11.9667	11.0778	11.1	11	14.6	13.3444	16.3833	15.8722	23.5889	22.5111
8/5/2008	10.7	12.7	5.7	8.8	13.3	15.5	11.8	12.7	12.0333	12.2389	10.7	12.5	14.6389	14.75	17.3222	16.7556	24.4556	23.6222
9/5/2008	10.6	13.2	6.1	8.3	13.5	15.7	11.5	13.3	11.6389	12.9722	10.9	12.4	14.4	15.6889	16.7111	17.4167	23.5111	24.4111
10/5/2008	11.7	12.7	7.1	8.2	14.6	15.7	12.6	12.9	12.2333	12.45	11.7	11.9	14.9	14.5889	16.7167	17.1	23.3222	24.3111
11/5/2008	11.5	12.8	6.6	8.6	14.4	15.7	12.3	13.2	12.45	13.0222	11.4	12.7	15.35	15.2444	17.1056	17.5833	23.6333	24.8778
12/5/2008	12.3	12.7	7.3	8.8	15.4	15.9	12.6	13.5	12.4778	13.0889	11.9	12.8	15.0778	15.5722	16.7056	17.7556	23.3444	24.4778
13/5/2008	13.1	13.7	8.5	9.7	16	16.8	13.1	14.8	12.9	12.9889	12.9	13.6	15.4944	16.0778	17.1556	17.5833	23.7333	24.5222
14/5/2008	14.1	14.5	8.9	10.1	17	17.5	14.5	15.7	13.6833	13.7778	13.3	14	15.8778	16.9778	17.45	17.5167	24.2778	24.0222
15/5/2008	13.8	14.6	8.8	10	16.4	17.4	13.8	15.9	13.7778	13.9	12.9	13.7	16.0167	17.1889	17.7111	18.2333	24.6556	24.9667
16/5/2008	13.1	14.3	8	10	15.9	17.4	13.4	15.9	13.7833	14.0278	12.8	13.9	16.6778	16.6	18.0222	18.0056	24.7222	24.9556
17/5/2008	12	13.7	7.4	9.2	14.9	16.7	12.6	15.6	13.0444	13.6444	11.9	13.8	15.6889	17.1111	17.2944	18.0111	23.8667	24.7222
18/5/2008	13.2	12.7	8.2	8.4	15.9	15.4	13.3	14.6	13.45	12.6444	12.8	12.6	15.8556	16.5611	17.0167	17.3944	23.1222	23.3444
19/5/2008	12.6	12.5	7	8.2	15.2	15.5	13.3	14.4	13.3556	12.6222	12	12.4	16.0389	16.3111	16.9278	17.3222	23.1222	23.5667
20/5/2008	11.5	12.1	6.4	7.7	14.2	15.1	12.8	13.7	12.4	12.2389	11.1	12.1	15.2889	15.4944	16.2722	16.6667	22.6222	23.5222
21/5/2008	11.7	13.5	6.3	8.8	14.6	16.6	12.7	15.1	12.1889	13.4722	11	13	15.3722	16.1167	16.1889	17.0944	22.3333	23.3222
22/5/2008	12	14.5	7.2	10	14.8	17.8	12.3	15.6	12.5944	15.0778	11.6	14.4	15.4667	17.9667	16.4833	18.2278	23.1444	25.5889
23/5/2008	13.2	13.5	8.6	8.7	16.2	16.1	13.6	15.3	14.0056	14.9167	12.8	13.5	16.6333	18.1278	17.4722	19.0778	24.3667	26.2444
24/5/2008	13.2	11.2	8.7	6.7	16.4	14.3	14	13.1	14.2278	12.4389	12.9	11.2	16.8944	15.9222	17.9167	17.4278	24.4667	24.6333
25/5/2008	12.7	11.8	8.3	7.1	15.9	15.1	13.6	13.1	13.9167	12.3889	12.5	11.7	17.0778	15.4889	18.05	16.9778	24.6444	23.4
26/5/2008	13.2	12.7	8	8.1	15.8	15.9	13.1	13.4	13.5278	12.9111	12.6	12.5	16.4722	15.5889	17.3667	16.7167	23.8222	23.4667
27/5/2008	13.4	13.5	8.8	8.7	16.3	16.5	13.5	14.2	13.2389	13.4444	13.1	13.3	15.9056	15.8167	17.0944	17	23.8778	23.4222
28/5/2008	14.6	14.2	9.7	9.8	17.1	17.3	14.9	15	14.3778	13.9667	13.9	14	16.9111	16.6333	17.6889	18.1333	24.3444	25.0667
29/5/2008	14.2	15.2	9.5	11.6	16.7	18.5	14.7	16.1	14.5111	15.6444	13.8	15.3	17.2889	18.1722	18.1611	19.3111	25.0333	26.3889
30/5/2008	12.9	15.2	8.3	11.3	15.2	18.1	13.4	16.1	14.05	15.6944	12.8	15.1	17.2778	18.1167	18.7278	#N/A	25.0889	26.2333
1/6/2008	12.3	13.8	7.4	8.9	15.1	17	13.3	14.9	12.4056	13.7222	12.2	13.6	15.7111	16.8	16.9556	18.1556	23.3889	25.3667
2/6/2008	12	13.7	7.3	8.7	14.9	16.9	12.8	14.6	12.4611	14.0556	11.6	13.4	15.4167	16.8056	16.5222	18.4222	22.8444	25.2111
3/6/2008	12.5	13.4	8.3	8.1	15.4	16.1	13.4	14.1	12.6889	13.6833	12	12.7	15.35	16.9667	16.45	18.7944	22.4556	25.5444
4/6/2008	14.5	12.8	10.5	7.4	17.7	15.2	15	13.6	14.5	12.1111	14.2	11.7	16.85	15.4222	17.6278	17.2333	24.1889	23.8222
5/6/2008	14.9	13.4	10.9	8.5	17.9	16	15.4	13.9	14.9111	12.7333	14.7	12.7	17.45	15.9889	18.2	17.4222	24.6333	24.0556
6/6/2008	15.7	14	11.7	9.4	18.5	16.8	15.8	14.7	15.4778	13.5778	15.2	13	18.1	16.4667	18.6667	17.6833	25.7444	24.4778
7/6/2008	15.7	13.4	11.2	8.6	18.8	15.9	15.9	14.3	15.7556	13.4333	15.2	12.8	17.8722	16.5556	19.1167	17.6722	26.3556	24.1778
8/6/2008	14.5	12.4	9.2	8.3	16.9	14.9	14.9	13.5	14.4778	13.0389	13.8	12.2	17.4333	16.1111	18.6722	18.05	25.3444	24.2556
9/6/2008	13.8	14.2	9	10.2	16.8	17.1	14	14.7	13.95	13.7667	13.1	13.5	16.8222	16.4056	18.0278	17.6389	24.4778	23.9333
10/6/2008	14.3	15.6	9.7	11.6	17.5	18.3	14.7	15.6	14.3611	14.9389	13.9	14.1	17.1611	17.4722	18.5222	18.2222	25.3667	25.1556
11/6/2008	15.7	15.1	11.5	11	18.8	17.8	15.8	15.6	15.4222	15.2222	15.2	13.9	17.9833	18.1056	18.8778	18.7056	25.8	25.3444
12/6/2008	15.8	15.4	11.2	11.4	18.6	18.3	16.1	15.5	15.5833	15.4667	14.9	14.7	18.1611	17.95	19.2778	18.85	25.8111	25.2889
13/6/2008	15.8	17.1	11.5	13.2	18.8	20.1	16	16.8	15.9667	16.4611	15.1	15.8	18.2111	18.9944	19.1667	19.9333	26	27.1
14/6/2008	15.9	18	11.6	14.5	18.7	21.2	16.1	18.1	16.1278	17.5222	15.2	16.6	18.5444	19.6222	19.3444	20.8389	26.2556	28.3333
15/6/2008	16.8	17.4	12.4	13.5	19.7	20.5	17.2	18	16.3944	17.1556	15.6	16.4	18.9667	19.6556	19.5444	20.9889	26.3222	28.1333
16/6/2008	18.3	18	14.4	14.2	21.1	20.8	18.2	18.2	17.5944	17.4611	17.1	16.7	19.8278	20.4611	20.4	21.7889	27.5	28.7778
17/6/2008	19.1	18.3	15.2	14.3	22	21.2	18.8	18.6	18.3333	17.7556	17.9	17	20.8667	20.6778	21.3222	21.9444	28.7333	28.8222
18/6/2008	18.2	17.9	14.1	13.4	20.8	20.8	18.7	18.4	18.5	17.5222	17.3	16.7	20.8111	20.2	21.5444	20.9667	28.7444	27.6667
19/6/2008	17.2	17.5	13.3	13.5	20	20.3	18.4	18.1	17.1278	17.1944	16.6	16.5	19.7889	20.2333	20.6333	20.9	27.9222	27.2889
20/6/2008	17.7	17.8	13.9	13.8	20.4	20.6	18.3	18.4	17.4778	17.5667	17	16.9	19.8222	20.6333	20.6111	21.25	27.5778	27.5556
21/6/2008	18.5	19.1	14.9	15.1	21.3	22.3	19	19.5	17.8944	18.4889	17.5	17.9	20.4444	21.2389	20.9722	21.5833	27.6111	27.9778
22/6/2008	18.7	19.4	15	15	21.8	22.4	19	19.8	18.2389	18.6778	17.7	18.1	20.95	21.2611	21.4833	21.8778	28.5111	28.5
23/6/2008	18.5	18.5	14.8	14	21.3	21.4	19.1	19	18.5611	18.0667	17.8	17.4	21.2389	21.1667	22.0722	21.7611	28.7556	28.9
24/6/2008	18.2	16.8	14.3	12.1	21	19.7	18.8	17.6	18.2889	17.2167	17.5	15.9	21.5111	20.3167	21.9444	21.3556	28.4889	28.1444
25/6/2008	18.1	16.2	13.6	11.8	20.5	19.2	18.6	16.9	18.5278	16.7278	17.2	15.5	21.6833	19.9278	22.1111	21.0611	28.6333	28.2222
26/6/2008	16.4	17.1	11.6	12.7	19	19.9	17.2	17.5	17.4444	16.8556	15.9	15.8	20.6778	20.3611	21.7278	21.3556	28.2889	27.9778
27/6/2008	15	17.3	9.7	13.1	17.3	19.9	15.5	17.6	15.65	17.1722	14.6	16.4	19.25	20.1944	20.5222	21.35	26.9778	28.0889
28/6/2008	14.7	17.6	10.1	13.4	17.7	20.6	15.5	18.1	14.8611	17.6944	14.2	16.8	18.2444	20.7556	19.9333	21.7833	27.1333	28.4
29/6/2008	16.3	17.9	12.3	14	19.3	21	16.3	18.7	15.8944	17.8222	15.4	17.2	19.1667	21.1389	20.4333	#N/A	27.8556	28.8222
30/6/2008	17.6	17.1	14.1	13.2	20.6	20.2	17.6	17.9	17.0833	17.1833	16.8	16.4	19.7722	20.6778	21.0944	#N/A	28.2222	28.4889
1/7/2008	17.6	16.9	14.2	12.8	20.6	20	17.6	17.4	17.8611	16.95	17.1	16.2	20.5833	20.4167	21.65	21.4167	28.7667	28
2/7/2008	18.4	18	15.1	14	21.2	21	18.1	18.1	18.2278	17.6889	17.8	17.1	21.1	20.7	21.8167	21.8667	28.3444	28.6889
3/7/2008	19.1	18.9	15.2	14.9	21.6	21.8	18.7	19.1	18.8	18.1111	18.2	17.5	21.8333	21.05	22.95	22.6056	29.5778	29.3111
4/7/2008	18.2	19	13.9	15.1	21	21.8	18.2	19	17.9944	18.4111	17.3	17.8	21.1778	21.6111	22.4722	23.2222	29.4333	30.5111
5/7/2008	18	19.8	14	16.2	20.8	22.6	18	19.4	17.7611	18.6278	17	18.2	20.9667	21.7444	22.1	22.4556	28.9222	29.6778
6/7/2008	18.5	20.4	14.9	16.5	21.3	22.9	18.8	20	18.3778	19.2278	17.5	18.6	21.3778	22.2889	22.2889	22.3611	29.1	29.1889
7/7/2008	19.5	19.6	16.1	15.7	22.3	22	19.6	20.2	19.5111	19.0222	18.5	18.4	21.7167	22.2	22.8333	22.9111	29.6889	29.3
8/7/2008	19.8	19.1	16.6	15.5	22.5	22.1	20	19.7	20.1	18.9889	18.9	18.1	22.4278	22.25	23.4278	23.3389	30.6	30.5889
9/7/2008	19.5	19.2	16.6	16	22.4	22.4	19.8	19.9	19.3722	19.3222	18.8	18.3	22.4222	22.3167	23.4	22.9444	30.6889	30.2778
10/7/2008	19.8	18.8	17.2	15.6	22.8	21.9	20.4	19.4	19.7222	19.1889	19.5	18	23.2833	22.2389	23.7222	22.6333	30.8556	29.9222
11/7/2008	20.5	18.3	17.3	14.9	23.2	21.4	20.6	19.2	19.9556	18.4556	19.3	17.8	23.1	22.1278	23.9944	22.5444	30.9444	29.6778
12/7/2008	19.7	18.8	16.4	15.9	22.6	21.9	20.6	19.3	19.1944	18.55	18.8	18.1	22.8167	21.9167	23.5278	22.5833	30.5556	29.6
13/7/2008	20.3	19.5	16.6	16.6	22.7	22.6	20.7	19.7	19.4778	18.8222	19.1	18.4	22.8222	22.4222	23.1111	22.7222	29.8333	29.8111
14/7/2008	20.9	20	17.4	17.1	23.4	23.3	21.3	20.4	20.0111	19.2611	19.6	18.8	23.2333	22.5444	23.3667	23.1056	30.0889	30.5778
15/7/2008	21.1	21	18	17.7	23.7	23.7	21.9	20.9	20.6556	20.0444	20.1	19.5	23.7667	23.0444	23.4778	23.4667	30.4222	30.7889
16/7/2008	21	21.6	17.7	18.6	23.6	24.5	21.9	21.5	20.7667	20.7944	19.9	20.2	24	23.7	23.6833	23.95	30.4667	31.3
17/7/2008	20.4	22	17.2	19.4	23.5	25.1	21.7	22	20.6111	21.3222	19.5	20.6	23.7222	24.1667	23.55	23.75	30.4	31.1222
18/7/2008	20.3	22.3	17.1	19.6	23	25.2	21.5	22.6	20.3333	22.1667	19.3	21.2	23.7333	24.7722	23.3667	24.3222	30.3444	31.7444
19/7/2008	20.7	22.1	17.6	18.9	23.3	24.9	21.7	22.6	20.3333	22.1333	19.7	21.1	23.3611	24.9111	23.4278	24.7944	30.0111	32.2778
20/7/2008	21.3	21.5	18.2	18.2	24	24.3	22.1	22.1	20.8056	22	20	20.7	23.6111	25.0389	23.5167	25.55	30.5	32.7778
21/7/2008	22.1	21.7	18.6	17.8	24.8	24.4	22.7	22.1	21.1667	21.8111	20.4	20.7	23.7278	24.9389	23.95	25.3611	31.0556	32.5556
22/7/2008	23.5	21.3	20.1	17.7	26.4	24.1	24	22.1	21.9056	21.7167	21.6	20.3	24.45	24.6611	24.7444	25.0778	32.0111	31.6111
23/7/2008	24	20.8	21	17.3	27	23.6	24.2	21.8	22.75	21.5333	22.1	19.9	25.1278	24.9167	25.3056	25.2333	32.8333	31.8556
24/7/2008	22	20.6	19.3	17.6	25	23.7	23.1	21.7	22.1	21.35	20.9	20.1	25.0833	24.7778	24.8667	25.1722	32.3	31.9
25/7/2008	20.8	20.5	17.6	17.5	23.7	23.3	22.6	21.6	21.4167	21.2944	20.2	19.9	24.7222	24.0889	24.6389	24.7389	31.7667	31.9
26/7/2008	21.1	19.9	18.2	17.1	24	22.8	22.7	21.2	20.9667	21.2389	20.5	19.7	24.2667	24.3389	24.1278	24.6944	31.0111	31.5333
27/7/2008	22.4	20.2	19.5	17.2	25.3	23.3	23.7	21.3	21.6889	21.2444	21.3	19.7	24.6889	24.55	24.6167	24.9833	31.7889	31.4222
28/7/2008	23.4	20.1	20.6	17.1	26.4	23	24.5	21.3	22.1611	21.1778	22.2	19.7	25	24.4556	25.3056	25.1611	32.4444	31.6778
29/7/2008	23.4	20.3	20.7	17.2	26.7	22.9	24.6	21.5	22.1944	21.0389	22.4	19.4	24.9222	24.4111	25.1056	24.7944	31.9444	31.3333
30/7/2008	24.5	20.3	21.4	17.5	27.5	22.9	25.3	21.3	22.5833	20.7056	22.9	19.6	25.3333	24.0111	25.2833	#N/A	32.4889	30.7222
1/8/2008	23.9	20.8	21.1	18.4	27.2	23.5	25.2	21.4	23.3556	21.5889	22.6	20.1	25.8944	24.4444	25.9056	24.9889	33.2667	32.0222
2/8/2008	23.2	20.5	20.5	17.7	26.6	23.5	24.8	21.5	23.3389	21.2333	22.4	19.7	25.9278	24.5167	26.0056	24.6833	33.3	31.6889
3/8/2008	22.8	19.5	19.9	16.8	25.8	22.4	24.2	20.7	23.1944	20.7722	22.1	19.3	26.0444	24.0389	25.9611	24.5722	33.1556	31.6556
4/8/2008	22.4	19.6	19.1	16.6	25.6	22.3	23.9	20.8	22.2944	20.1889	21.5	19	25.2667	23.1611	25.2222	23.9167	32.0889	30.6556
5/8/2008	22.8	19.6	19.7	16.7	26.4	22.3	24.3	20.6	22.5278	20.3333	21.9	18.9	25.5222	23.5333	24.9833	23.8278	31.6111	30.6444
6/8/2008	23.6	19.8	20.4	17.2	27.2	22.5	24.7	20.6	22.8444	20.7111	22.3	19.1	25.6944	23.8889	25.1611	24.25	31.9556	31.0889
7/8/2008	24.3	20.7	21.9	18.3	28.1	23.9	25.4	21.3	24.1333	21.5056	23	19.7	26.3889	24.3333	25.9444	24.3833	33.0667	31.2111
8/8/2008	23.4	20.8	21.1	18.5	26.5	23.7	24.5	21.4	24.4222	21.7778	22.8	20	27.1333	24.4722	27.0556	24.7222	34.4	31.8778
9/8/2008	21.2	21.1	18.7	18.8	24.2	24.4	23.3	21.8	22.4778	21.7389	21.2	20.1	26.3556	24.7333	26.6111	24.6444	34.1556	31.7889
10/8/2008	20	20.6	18	18.4	23.2	23.6	22.2	21.7	21.1222	21.25	20.1	20.1	25.2944	24.5778	25.2778	24.2667	32.5778	31.3556
11/8/2008	21	20	18.6	18	24.2	23.2	22.4	21.5	21.8667	20.8278	20.7	19.6	25.3222	24.3111	24.9667	24.0722	32.3222	30.9667
12/8/2008	20.6	19.4	18.1	17.3	24	22.6	22.6	21.3	21.7222	20.3667	20.4	19.2	24.9889	23.9167	25.0667	23.9667	31.9667	30.7556
13/8/2008	21	19.4	18.4	17.2	24.3	22.3	22.5	20.9	21.3278	19.8722	20.3	18.7	24.7667	23.2889	24.7333	23.6444	31.3556	30.7778
14/8/2008	22	20.6	19.3	17.9	25.1	23.3	23.4	21.5	21.65	20.1444	20.9	19.2	24.9	23.5778	24.5722	23.9389	31.2889	30.8889
15/8/2008	22	20.6	19.3	18.4	25	23.7	23.4	21.4	21.7278	20.7167	21	19.3	24.9167	24.0444	24.5222	24.1278	31.1444	31.5
16/8/2008	21.9	20.6	19.5	18.2	24.9	23.7	23.3	21.7	21.8222	20.8056	20.9	19.6	25.1444	24.0944	24.6	23.8	31.3556	30.9889
17/8/2008	22.1	20.6	19.9	18.8	25.3	23.8	23.3	21.6	22.15	20.8667	20.9	19.7	25.3278	24.25	24.7111	23.9667	31.6778	31.2222
18/8/2008	21.5	20.5	19.2	18.7	25	23.4	22.7	21.5	22	21.2	20.7	20	24.9611	24.2111	24.6778	24.1889	31.8333	31.0111
19/8/2008	21	20.4	18.5	17.8	24.6	23.2	22	21.6	21.2333	20.6556	20.3	19.4	24.5111	24.15	24.3722	24.1278	31.0778	31.1556
20/8/2008	20.7	20.5	17.9	18.1	24.4	23.6	22.2	21.6	20.8056	20.9278	19.9	19.8	24.2	23.8167	24.4889	23.8611	31.5889	30.6889
21/8/2008	20.5	20.8	18.2	18.6	24.1	24	21.9	21.6	20.6111	21.2667	19.7	20.1	23.8722	24.0722	24.4778	23.9944	31.7111	31.3556
22/8/2008	20.4	20.9	18.3	18.1	24	24.1	21.8	21.8	21.0222	21.2	19.7	19.9	24.1611	23.7444	24.5333	23.9722	31.7556	31.2444
23/8/2008	20.5	20.1	17.8	16.7	23.6	22.9	21.8	21	20.8889	20.7611	19.7	19.3	24.5278	23.6444	24.6889	24.4111	31.7333	31.5889
24/8/2008	20.2	19.1	17.8	15.7	23.4	22.4	21.5	20.2	19.7833	19.2278	19.4	18.4	23.4667	23.05	23.8556	22.8833	31.0889	29.6333
25/8/2008	21.7	19.5	19.3	16.2	25	22.8	22.3	20.3	20.9778	18.9722	20.4	18.6	24.3778	22.4889	24.4333	22.6611	31.6556	29.3889
26/8/2008	22.2	19.6	19.2	17	25.2	22.9	22.6	20.3	21.3278	19.5889	20.7	18.6	24.85	23.2222	24.7444	23.2	32.1333	30.6333
27/8/2008	22.1	20.3	19.3	17.6	25	23.4	22.8	20.8	21.25	19.9278	20.3	19.1	24.8333	23.4389	24.3611	23.6278	31.3556	31.2333
28/8/2008	22.3	19.9	19.2	16.8	25.1	23.1	22.6	20.6	21.2833	19.9278	20.4	18.9	24.8444	23.2944	24.7833	23.4278	32.0111	30.7889
29/8/2008	22	19.3	18.6	17	25.2	22.6	22.4	20.4	21.1389	19.9056	20.4	19.1	25.1167	23.2	24.6722	23.8	31.9556	30.7111
30/8/2008	20.9	19.6	17.4	16.9	24	22.6	21.6	20.5	20.5	19.6	20.1	18.7	24.6611	23.1722	24.6389	#N/A	31.4667	29.6111
1/9/2008	18.5	19.9	16	16.8	22.2	22.8	20	20.4	18.9389	19.6444	18.1	18.6	23.1222	22.9056	23.7222	23.2944	30.4778	30.6222
2/9/2008	19.1	18.9	16.4	15.3	22.3	21.6	20.1	19.6	19.25	18.7833	18.3	17.5	23.4111	22.3167	23.4111	22.8556	30.5111	29.7444
3/9/2008	20.1	18.8	17.3	15.3	23.4	21.4	20.7	19.7	19.7333	18.6722	19.1	17.8	23.3556	22.3111	23.0833	22.8889	29.6556	29.8444
4/9/2008	20.3	17.9	16.8	14.8	23.1	21	20.8	18.9	19.8722	18.5667	18.9	17.6	23.6056	22.1611	23.2944	22.8944	30.2	29.8222
5/9/2008	18.9	17.6	15	15.1	21.9	20.9	19.9	18.8	18.9778	17.7944	17.8	17.4	22.9444	21.7556	23.1611	22.7778	29.9444	30.0778
6/9/2008	18.4	17.8	14.6	14.7	21.5	20.5	19.3	19.1	18.1333	17.3056	17.6	16.7	22.1167	21.2167	22.1611	22.4	28.5444	29.4333
7/9/2008	18.2	17.3	15.2	14.3	21.2	20.1	18.9	18.2	18.1611	16.5444	17.7	16.1	22.1778	20.3333	22.8556	21.3278	29.7889	28.1222
8/9/2008	18.2	16.9	15.1	14.1	20.9	20.2	18.8	18	18.0444	16.1944	17.7	15.8	22.2444	19.95	23.0889	20.7056	30.2556	27.6889
9/9/2008	18.5	17.4	15.4	14	21.3	20.3	19	18.3	18.5	16.8278	17.5	16.2	22.8556	20.55	23.5222	20.7056	30.6	27.4667
10/9/2008	17.5	17.5	13.3	14	20.2	20.4	18.5	18.4	17.7222	17.1389	16.8	16.8	22.1833	20.9833	23.4167	21.1944	30.6667	27.6
11/9/2008	17	17.3	12.9	14	19.9	20.6	18.1	18.1	17.2722	16.8222	16.5	16.3	21.2667	20.4667	22.1	20.7889	29.0111	27.5222
12/9/2008	16.6	17.7	12.5	13.7	19.5	20.5	17.8	18.2	16.7611	16.7111	15.7	16	20.75	20.0111	21.5667	20.5111	28.1778	27.2667
13/9/2008	16.2	16.8	11.9	13.4	19.1	19.4	17.4	17.1	15.9389	15.9778	15.3	15.7	20.1944	20.0667	21.0944	20.5722	27.3444	27.1889
14/9/2008	16.3	16.4	12.8	13.2	19.1	18.9	16.9	16.6	16.1667	16.2778	15.6	15.7	20.2222	19.85	21.0333	20.4167	27.6556	27.4
15/9/2008	16.9	16.8	13.7	13.2	19.9	18.9	17.3	16.8	16.4222	16.2889	15.8	15.7	20.4	19.5833	21.4333	20.0722	28.5	27
16/9/2008	17.6	17.2	14.4	13.6	20.5	19.7	17.7	17	17.15	16.6278	16.4	16	20.9389	19.9278	21.4444	20.4167	28.6333	27.3556
17/9/2008	18	18.1	15.5	14.5	20.5	20.8	17.8	18.4	17.7944	17.3778	16.8	16.5	21.6	20.4556	22.4833	21.0278	30.5333	28.1444
18/9/2008	17.9	18.4	15.3	14.5	20.8	21	18.3	18.5	17.85	18.0389	17.1	17	21.6833	20.9778	22.6222	21.3722	30.2222	28.4556
19/9/2008	18.9	17.2	15.3	13.8	21.2	19.9	18.7	17.6	18.4611	17.2667	17.5	16.4	22.3167	20.8222	22.8111	21.7778	29.9556	28.9111
20/9/2008	18	17.7	14	14	20.1	20.2	18.3	17.7	17.55	16.9167	16.6	16.3	21.7333	20.5778	22.2333	21.3167	28.6	28.1
21/9/2008	17.5	17.8	13.5	13.3	19.9	20.4	17.5	18	17.5222	17	16.2	16	21.1167	20.4333	21.4333	21.0056	27.7778	27.9
22/9/2008	17.8	17.9	13.6	13.4	20.2	20.3	18.2	18.2	17.6889	17.1944	16.5	16.4	21.2	20.8667	21.3389	21.3778	27.4778	28
23/9/2008	17.1	18	12.8	14	20	20.6	17.5	18.1	16.6444	16.95	16	16.4	21.0056	20.9167	21.3444	21.25	28.0111	28.1333
24/9/2008	16.4	18.6	12.1	14.8	19.1	21.2	17	18.5	15.5111	17.3611	15.1	16.9	19.8889	21.2	20.65	21.3389	27.1	28.4
25/9/2008	17.1	17.7	12.5	13.5	19.8	20.3	17.2	18.2	15.9167	16.9778	15.4	16	19.4278	21	20.2389	21.1111	26.6667	28.1889
26/9/2008	17.9	16.5	13.1	12.6	20.6	19.2	17.9	17.5	16.1722	16.0056	15.7	15.4	19.95	20.3278	20.6167	20.4667	27.6333	26.9556
27/9/2008	17.8	17.1	13.9	12.5	20.6	19.8	17.9	18	16.2722	16.3389	16	15.5	20.1	19.8222	20.9444	19.7278	27.9444	26.2111
28/9/2008	18.7	17	14.8	12.1	21.1	19.6	18.1	17.9	16.3667	16.7667	16.4	15.8	19.9611	20.1333	20.65	20.1778	27.7	26.4
29/9/2008	18.3	15.9	14.6	11.2	20.5	18.7	17.8	16.6	17.4333	16.0611	16.7	15.1	20.5167	19.9778	21.0944	#N/A	28.7111	26.5667
30/9/2008	17.2	15.2	13.1	10.9	19.6	18.3	17.8	16.5	16.3333	15.0056	15.9	14.4	20.5333	19.1889	21.0111	#N/A	27.8222	25.9222
1/10/2008	16.6	15.8	12.1	12.3	19.1	18.6	17.6	16.6	15.8167	14.9056	15.3	14.4	20.0056	18.9556	20.4833	19.3167	26.9222	25.5222
2/10/2008	15.4	16.2	10.2	12.5	17.5	18.9	16.4	16.9	14.7333	14.6944	14.1	14.3	19.05	18.5444	19.8278	18.6056	26.0778	25
3/10/2008	14.5	16.2	9.3	11.6	16.9	18.9	15.5	16.7	13.5111	15.0889	13.3	14.3	17.7	18.7611	18.3	18.3222	24.1667	24.7556
4/10/2008	13.7	15.3	8.8	10.7	17	18.1	14.4	16.3	12.9722	14.5667	12.9	13.9	16.9167	18.4111	18.0778	19.0278	24.4	25.1333
5/10/2008	13	14.5	8.2	9.1	16.1	17.5	14	15.9	11.9222	14.0611	12	13.1	15.9278	17.65	17.3444	18.3222	23.4222	24
6/10/2008	12.3	14.2	7.6	9.3	15	17.2	13.3	15.3	12.2333	13.7056	11.6	12.8	16.4778	17.6278	17.6611	17.9889	24.0889	24.3778
7/10/2008	10.1	13.7	5.6	9.6	12.9	16.4	12.1	14.4	10.7389	13.8556	9.9	13.2	15.3556	17.5778	16.5889	18.2778	22.5889	24.9
8/10/2008	9.7	13.4	5.7	8.3	12.8	16.3	11.3	14.2	9.26111	12.7778	9.3	11.9	13.2556	16.7944	14.95	17.8111	21.4111	23.8556
9/10/2008	11.6	13.3	7.4	7.9	14	16.2	11.7	13.7	10.3944	13.0667	10.3	11.9	13.3722	16.4222	15.6778	17.5889	22.5667	23.5111
10/10/2008	12	13.1	7.6	8.9	14.5	16.1	12.3	13.7	10.7611	13.0556	10.7	12	13.8556	16.55	15.8278	17.4222	21.9778	23.5111
11/10/2008	11.8	13.6	7.3	9.7	14.5	16.6	12.1	14.1	10.8944	12.9167	10.7	12.3	13.7389	16.55	15.6444	17.5889	21.7	23.8333
12/10/2008	11.5	14.2	6.9	10.5	14.2	17.3	11.6	14.8	10.6667	12.8333	10.3	12.7	13.8056	16.2722	15.5944	17.9611	21.7889	24.3667
13/10/2008	11.4	14.8	7	11.1	14.1	17.5	11.4	15	10.5444	13.2778	10.1	13.2	13.8611	16.6889	15.3722	18.3556	21.5111	25.1
14/10/2008	12.1	14.6	7.6	10.6	14.7	17.4	11.9	15.1	11.0222	13.2778	10.7	13	13.9389	16.7722	15.8056	18.3167	21.9667	24.5889
15/10/2008	12.4	13.5	7.5	9.2	14.9	16.3	12.4	14.4	11.2944	12.5889	10.9	12.2	14.4833	15.7944	15.7222	17.3056	21.5111	22.8889
16/10/2008	11.8	12.7	7.3	8	14.3	15.5	11.7	13.1	10.9611	11.9611	10.4	11.6	14.4889	15.3278	15.4944	16.9	21.1889	22.4111
17/10/2008	12.1	12	7.4	7.6	14.7	14.9	12	12.9	10.9722	12.1833	10.7	11.4	13.9833	15.2389	15.3333	16.85	21.4556	22.3
18/10/2008	11.2	11.4	6.4	7.3	13.9	14.5	11.5	12.5	10.9611	11.8667	10.3	11.1	14.2	15.0167	15.15	16.6333	20.6556	22.7333
19/10/2008	11.9	11.1	7.2	6.4	14.3	13.7	11.7	11.9	11.2444	11.2167	11.3	10.8	14.5667	14.7	15.55	16.15	21.3111	21.9444
20/10/2008	12.6	10.9	8.4	6.4	15.4	13.5	12.8	11.6	11.9111	10.5556	12.2	10.3	15.1222	13.9167	16.5833	15.8944	22.6444	22
21/10/2008	11.7	10.9	7.6	6.4	14.2	13.2	11.8	11.3	10.9944	10.0222	10.8	10.1	13.4611	13.0611	15.9056	15.5889	22.5778	21.4667
22/10/2008	10.8	12.1	7.2	7.2	13.4	14.2	11.7	11.9	10.1444	10.9722	10	10.9	12.3611	13.9389	15.5056	15.9111	22.3	21.8444
23/10/2008	11.5	11.9	7.1	6.8	14.3	13.9	12	11.9	11.1167	11.4278	11.1	11	13.3444	14.2833	16.2778	16.2333	22.7444	22.1
24/10/2008	10.7	10.1	6.4	4.8	13	12.2	10.9	10.6	10.0833	9.86667	10	9.3	12.6833	13.3889	15.4389	15.2889	21.9667	20.5556
25/10/2008	11.4	9.2	6.9	3.9	13.8	11.6	11.4	9.8	10.2889	9.30556	10.7	8.9	12.7778	12.4056	15.4333	14.05	21.7889	19.1333
26/10/2008	11.2	9.7	7.8	4	13.3	12.3	11.7	10	10.7833	9.81111	10.8	9.7	13.15	12.5222	15.8389	14.0278	22.0333	19.1
27/10/2008	12.1	10.2	8.4	4.3	14.3	12.1	12.1	10.3	10.9667	10.3389	11.2	9.9	13.3	13.9167	15.7389	14.6611	22.1222	19.8444
28/10/2008	13	9	8.6	3.8	15.1	10.6	12.7	9	12.0222	9.03889	12.2	8.3	13.9667	12.2722	17.0944	14.0722	23.5333	20
29/10/2008	12.3	9.5	8.2	5	14	11.5	11.9	10	10.8389	8.92778	11.2	8.5	13.1778	11.7944	16.4056	13.9444	23.1444	19.5
30/10/2008	11.3	10.3	7.7	5.4	13.4	11.8	11.3	10.2	10.2444	9.18333	10.2	8.8	12.5889	12.9889	15.5	#N/A	22.1889	19.6889
1/11/2008	11.4	9.8	7.2	5.2	13.6	11.8	11.6	9.8	10.9333	9.3	10.8	8.8	13.8389	11.8278	16.2833	14.2444	22.2778	20.3667
2/11/2008	9.7	9.3	5.8	5.1	11.8	11.8	10.2	9.8	9.48333	9.64444	9.2	9	12.3722	12.0167	15.1167	14.6056	20.9333	21.2222
3/11/2008	10.5	9.4	7.1	5.5	12.6	11.3	10.8	9.7	9.81667	8.62778	9.9	8.5	12.3389	11.95	15.0111	13.9667	20.9556	19.9556
4/11/2008	11	9.3	7.6	5.9	12.6	11	11.1	9.7	10.0611	8.68333	10.1	8.8	13.0167	12	15.5278	14.4222	21.6111	20.5556
5/11/2008	11.7	9.3	8.3	5.4	13.4	11	11.4	9.7	10.2222	9.19444	10.4	8.9	13.7611	11.8	15.7222	14.6333	21.8111	21.2222
6/11/2008	11.1	8.5	7	4.3	13	9.9	11.3	9.1	9.93333	8.73889	9.8	8.4	13.1833	11.4444	14.9167	14.2333	20.7778	20.3444
7/11/2008	9.7	8.3	6.2	3.9	11.4	9.8	10.5	8.6	9.15	7.89444	8.9	7.6	12.6556	10.5167	14.4056	13.5167	19.8778	19.3667
8/11/2008	9.4	7.9	5.6	3.9	11.5	9.5	10	8.2	9.21111	7.81111	8.7	7.2	11.5389	10.4722	14.2944	13.7833	19.7333	19.9889
9/11/2008	8.6	7.9	4.4	4.5	10.5	9.7	9.5	8	8.33333	7.42222	8.1	7.4	11.3278	9.95	13.9222	13.7778	19.5	20.1222
10/11/2008	7.4	7.6	3.9	4.4	9.4	9.2	8.8	7.9	7.51667	7.38333	7.3	7.1	10.2889	9.74444	13.3444	13.0944	18.9889	19.4889
11/11/2008	8.1	7.4	3.9	3.9	9.9	9	8.8	7.6	7.5	6.81667	7.8	6.6	10.8556	9.43333	13.2833	12.5722	19.0222	17.7444
12/11/2008	7.2	7.1	2.7	3.3	9.1	8.6	8.4	7.3	7.27778	7.15	7.2	6.7	11.0611	10.6111	13.1389	12.7611	18.2111	18.4333
13/11/2008	6.8	7.2	2.5	3.2	8.9	8.9	8.1	7.2	6.57222	7.47222	6.7	6.8	9.76667	10.8111	12.2833	13.4222	17.0556	19
14/11/2008	7	7.7	2.4	3.2	8.8	9.4	7.9	8.2	7.02222	7.16667	6.5	7.1	10.0167	10.1611	12.2889	12.65	17.3778	18.2556
15/11/2008	7.7	8.4	2.9	3.8	9.4	10.1	8.2	8.4	7.35556	7.63889	7.7	7.6	10.2611	10.2722	12.5389	12.2889	17.9333	18.1
16/11/2008	6.6	8.9	1.9	4.4	8.3	10.3	7.4	8.6	6.68333	8.17778	6.5	8.4	9.69444	10.2778	11.9	13.1167	17.3111	18.9111
17/11/2008	6.9	7.7	2.2	3.7	8.4	9.6	7.5	7.6	7.07778	7.51667	6.9	7.6	9.23333	10.1722	12	12.9944	17.3889	18.6
18/11/2008	6.8	7.9	1.9	4.7	8.2	9.4	7.6	8	7.03333	7.49444	6.9	7.8	10.0889	9.47778	12.3778	13.0611	17.0556	18.6889
19/11/2008	4.7	9	0.3	6	6.6	10.6	6	8.8	4.82778	8.15556	4.8	8.7	7.13333	10.1667	10.4778	13.5667	15.6444	19.7444
20/11/2008	3.8	9.6	-0.3	6	5.7	11	5.3	9.2	3.70556	8.44444	3.9	9.2	5.84444	10.5444	10.1667	14.0333	15.6111	20.2111
21/11/2008	4.1	8.2	-0.2	5.5	5.9	10	5	8.4	3.83889	7.46667	4.1	7.9	5.76111	9.40556	9.62222	13.4556	14.6333	19.2444
22/11/2008	3.6	8.3	-0.6	5.9	4.9	9.3	4.7	8.3	3.09444	6.98333	3.9	7.7	4.84444	8.83889	9.47222	13.1389	14.5889	19.2333
23/11/2008	4.5	8	1.4	5.5	5.7	9.7	5.4	8.5	3.73333	6.92222	4.8	7.5	5.77778	8.62778	10.15	12.7944	15.6667	19.2111
24/11/2008	5.4	7.1	3.1	4.3	6.6	8.7	5.7	8.3	4.95556	6.72222	5.8	7.4	6.79444	8.95556	11.7833	12.8278	18.0778	18.5556
25/11/2008	5.8	6.9	2.7	3.6	6.5	8	5.8	7.7	4.67778	6.13889	5.2	7.2	6.08889	8.2	11.5611	11.9389	17.7667	17.4222
26/11/2008	4.2	6.5	0.7	3	5.3	8	4.8	7.4	3.37778	5.82222	4	6.3	5.87222	8.46111	9.86111	11.7611	15.6556	17.1
27/11/2008	3.9	6.2	0.8	3.1	5.4	7.9	4.7	6.9	2.98889	5.25	3.8	6.4	4.49444	7.67222	9.2	11.2056	14.8444	16.3444
28/11/2008	3.4	6.6	1.3	3.8	4.9	7.6	4	7.1	3.02222	5.87222	4	6.7	4.82222	7.74444	9.15556	12.0111	14.7111	17.7778
29/11/2008	2.5	6.4	1.5	3.4	4.1	7.4	3.8	7.3	2.86111	5.79444	3.3	6.3	4.48889	7.58889	9.16667	#N/A	15.2111	16.9778
30/11/2008	3.9	6.1	2.8	1.8	4.6	7.2	4.5	6.9	3.1	5.52778	3.8	5.7	4.84444	8.02778	9.3	#N/A	15.5222	16.5444
1/12/2008	5	4.8	2.3	1.1	6	6.4	5.1	6.2	3.96667	4.28333	4.7	5.2	5.65556	6.96111	10.3	10.2833	16.1556	15.5222
2/12/2008	6.2	6.3	3	2.4	6.6	8	5.7	7.2	5.16111	5.73889	6.2	6.1	6.40556	7.94444	10.9944	11.2833	16.3889	16.3778
3/12/2008	6.3	6.9	3.6	2.8	6.8	8.8	5.7	7.3	5.48333	6.38889	6.4	6.9	6.28889	7.69444	11.6778	11.8556	17.2556	17.1222
4/12/2008	5.9	7.7	2.9	4.5	5.9	9.3	5.6	7.9	4.87222	7.2	5.8	8.1	6.46111	7.71667	11.2944	12.7722	17.0444	18.3778
5/12/2008	4.1	8	2.1	4.2	4.5	9.1	4.3	8	3.52222	7.7	4	8.2	5.35	9.01111	10.0833	12.9833	15.6444	18.9556
6/12/2008	4.6	6.3	2.9	3	5	7.7	4.4	7.2	3.76111	5.56667	4.7	6.4	5.11667	7.18889	9.83889	11.4667	15.8444	17.5333
7/12/2008	4.2	7.5	3.3	4.1	4.4	8.3	4.3	8	3.15	6.55	4	7.6	4.7	8.08889	9.76667	13.0722	15.9111	18.2556
8/12/2008	5.2	7.3	3.7	3.5	5.4	8.6	5	8	3.56667	6.82222	4.5	7.4	4.58889	8.11111	10.0333	12.9111	16.4556	18.0889
9/12/2008	5.1	5.4	2.8	1.8	6.2	6.7	5.2	6.5	4.43889	5.26667	5.3	5.7	5.27222	6.67778	10.0667	11.3056	15.7667	16.9778
10/12/2008	4.5	4.9	1.6	0.7	5.5	6.4	4.7	6.3	5.07778	4.32778	4.9	4.4	6.6	5.96111	10.6611	10.7	16	16.1667
11/12/2008	5	5.9	2.1	2.4	6	8	5	7	5.18333	5.18889	5.6	6.3	6.59444	6.12222	10.9333	10.8722	16.3222	16.7778
12/12/2008	4.6	7	2.2	3.1	5.8	8.6	5.1	7.5	4.96111	6.85556	5.8	7.4	6.13889	8.19444	11.3556	12.3944	16.6111	18.1889
13/12/2008	4.7	5.4	2.5	1.9	6.2	7.5	5.4	6.6	4.98333	5.49444	5.8	5.8	5.57222	7.36667	10.9	11.3889	16.5333	16.9889
14/12/2008	5.4	6.1	1.8	2.1	6.6	8.1	5.6	7.1	5.26111	5.62778	5.9	6.3	6.57222	7.58889	11.5	11.5444	16.8667	17.0778
15/12/2008	5.3	5.3	1.1	2	6.6	6.7	5.5	6.1	5.21111	4.73889	5.5	5.2	6.86111	6.75	11.4833	11.1778	16.6889	16.8222
16/12/2008	4.8	5.1	0.2	2	6.1	6.2	5.4	6.3	4.53889	4.91111	4.8	5.1	6.26667	6.26667	11.1722	10.8222	16.3333	16.4667
17/12/2008	5.6	5.3	1.4	2	7	6.7	5.9	6.4	5.61111	5.03889	6.2	5.8	7.27222	6.53333	11.6611	11.4444	16.9889	17.0667
18/12/2008	4.2	4.8	0.2	0.7	5.5	6.3	4.9	5.8	4.35556	4.51667	4.2	4.9	5.83889	6.50556	10.2889	10.7889	15.7667	15.6667
19/12/2008	4.3	3.3	0.1	0.4	6.1	4.7	4.8	4.7	4.57222	3.06667	5.1	3.6	6.53333	5.02778	10.4444	9.87778	15.4778	14.7778
20/12/2008	3.8	4.4	0.4	1.6	5.1	6	4.5	5.8	4.37222	4.14444	4.5	4.8	6.10556	5.81667	10.1	10.4611	15.4444	16.5222
21/12/2008	2.6	4.7	-0.9	1.4	3.9	6.2	3.4	5.6	2.91111	5.09444	2.9	5.4	4.88889	5.95556	8.67222	10.8944	13.8556	17.1
22/12/2008	2.3	4.5	-0.6	1.5	3.3	5.5	3	5.5	2.47222	4.16667	2.9	4.7	3.83889	5.62778	8.69444	10.7278	14.4222	16.3444
23/12/2008	2.8	4.1	0.5	1.4	3.7	5.1	3.4	5.5	2.30556	4.23889	3	4.5	3.58889	6.47222	8.51111	10.5278	14.4333	15.7333
24/12/2008	3	4	-0.1	0.9	3.6	5.6	3.5	5.2	1.94444	4.3	2.8	4.6	3.78333	7.03889	8.66111	10.4389	14.5333	15.7778
25/12/2008	3.2	3.4	1	1	3.9	4.4	4	4.5	2.31667	3.18889	3.7	3.7	3.91111	5.17222	9.36111	9.15	15.5111	14.3556
26/12/2008	3.1	3.9	1.1	1.3	3.6	5.2	3.6	4.9	2.68333	3.7	3.3	4.2	3.48333	5.45	8.61667	9.63333	15.3667	15.6778
27/12/2008	2.9	4.5	1.1	1.2	3	5.8	3.5	5.2	2.68889	4.71111	3.4	4.1	4.35	5.24444	8.71667	10.1944	14.7444	15.8444
28/12/2008	2.2	3.7	0	0.7	2.5	5.2	3	5.2	1.68889	3.83333	2.3	3.7	3.18889	5.05556	7.63333	9.7	13.0333	15.1667
29/12/2008	0.9	3.6	-2	-0.1	1.2	4.9	1.8	4.7	-0.116667	4.35556	1.2	4	1.67222	6.23889	5.92222	9.90556	11.5222	15.5222
30/12/2008	1.4	2.2	-0.9	-1.2	2.1	3.2	2.1	3.7	0.538889	2.56111	1.6	2.7	2.03333	5.32222	6.17778	#N/A	12.0667	14.1889
1/1/2009	4	2.9	1.3	-0.8	4.6	3.9	4.1	3.9	3.12778	2.11111	3.7	2.6	3.85	4.18333	8.46111	9	14.4556	14.1778
2/1/2009	3.5	3.8	0.1	0.3	3.7	4.8	3.6	4.7	3.27222	3.07778	3.2	3.6	4.82778	4.89444	9.31667	9.27222	14.4667	14.5222
3/1/2009	3.1	5	0.3	0.6	2.7	6.3	3.2	5.6	2.41667	4.87222	3	5.4	4.45	6.83333	8.83333	10.4	14.3111	15.5889
4/1/2009	3.1	2.2	0.8	-1.5	2.8	3.7	3.3	3.3	2.51111	2.23889	3.2	2.4	4.38333	4.38333	8.92778	8.22778	14.9556	13.5111
5/1/2009	4.1	2.1	1.8	-0.8	4.6	3.4	4.4	3.1	3.36111	2.05	4.1	2.9	5.75	3.35556	9.62222	7.41667	15.8111	13.2333
6/1/2009	4.3	2.7	1.4	0	4.8	3.3	4.5	3.5	3.75556	2.67778	4.4	3.2	5.82222	3.50556	9.86111	8.28333	15.3556	14.1333
7/1/2009	3.5	3.3	0.3	0.5	3.8	4.4	3.8	4	2.92778	2.49444	3.7	3.1	5.81667	3.59444	9.09444	7.7	14.6667	14.2
8/1/2009	2.7	4.2	-0.2	0.9	3.4	5.3	3.4	4.9	2.47222	3.42778	2.9	4.3	5.43333	4.24444	8.45	8.97222	13.9889	14.6889
9/1/2009	3.5	4.7	0.4	1.8	4.5	5.6	4.2	5.1	3.24444	3.57222	3.7	5	5.07778	4.27778	8.79444	9.42222	14.0778	15.3111
10/1/2009	4.9	4.7	0.8	1.9	6	5.8	5.3	5.2	5.36111	4.2	5.4	4.9	8.23889	5.81667	10.8778	10.4056	16.4111	16.1222
11/1/2009	3.2	4.6	-0.8	1.9	4	5.4	4	5.2	3.45556	3.64444	3.4	4.7	6.38333	5.25556	9.58333	10.3667	14.4667	16.5222
12/1/2009	2.2	3.5	-1.4	0.8	3	4.4	3.1	4.3	2.03889	3.22222	2.1	3.6	4.7	5.76111	7.91667	9.31111	13.3111	15.6889
13/1/2009	3.6	3.7	0.1	1	4.7	4.9	4.2	4.6	2.66667	3.51111	3.7	4.1	4.88889	5.20556	8.46667	9.18889	13.7111	14.9556
14/1/2009	3.9	3.9	-0.4	-0.1	5.5	5.3	4.6	4.6	3.63889	3.42778	4.1	3.9	5.98333	5.32778	9.48333	9.12778	14.5222	14.2111
15/1/2009	3.5	3.9	-0.5	-0.4	4.8	5.4	4.2	4.5	3.58333	3.63333	3.9	4.2	4.61111	5.68889	9.41111	9.22778	15.1889	14.1111
16/1/2009	3.4	5.3	0.1	2	4.5	6.6	4	5.7	3.43333	4.63333	3.9	6.2	5.00556	6.36111	8.97222	10.5222	14.6444	16.3444
17/1/2009	2.7	6.4	-0.4	3.4	3.8	7.1	3.3	6	3.03333	5.96667	3.3	6.5	5.3	6.71111	8.45556	11.8611	14.5	17.9778
18/1/2009	3.1	6.5	0.3	2.5	4.7	7.7	3.8	6.4	3.36667	6.42222	3.7	6.8	4.71111	7.69444	8.62778	12.4556	14.2222	17.7667
19/1/2009	3.5	6.6	-0.1	2.4	4.9	8	3.9	6.8	4.03333	6.95556	4	7.2	6.53889	8.88889	9.65	11.7167	15.2222	17.4333
20/1/2009	3.3	5.4	0.8	2.6	4.8	6.6	3.8	6.2	3.10556	5.42222	3.8	6	5.02778	8.02222	8.78889	10.8056	14.8444	16.5667
21/1/2009	4.8	5.4	2.8	2.2	5.4	6.3	4.9	6.2	4.03333	4.69444	5	5	5.46111	6.38889	9.56111	9.51667	15.8889	15.0556
22/1/2009	5.5	5	3.1	1.3	6.5	6.5	5.4	5.6	5.16667	4.51667	5.9	4.7	7.07222	6.25556	10.7833	10.0278	16.7111	15.2778
23/1/2009	5.1	5.2	2.8	2.1	6.2	6.5	5.4	5.8	4.56667	4.33333	5.4	4.7	6.00556	6.25556	10.0333	10.25	16.6667	15.3222
24/1/2009	4.9	6	0.8	2.6	6.3	7.4	5	6.5	4.70556	5.2	5.3	5.7	6.21667	6.83889	10.3944	10.7	16.5444	16.4889
25/1/2009	3.3	6.3	-0.5	2.4	5	7.9	4.1	7	3.44444	5.95556	3.7	5.7	6.23889	8.1	9.48889	11.8611	15.3222	17.9444
26/1/2009	3.2	6	-0.1	2.1	4.9	7.5	3.9	6.6	3.4	5.17222	3.8	5.5	6.09444	7.23333	9.11111	11.5444	14.9667	17.7556
27/1/2009	3.5	6.4	0.1	2.7	5.2	7.6	4.4	7	3.06667	5.54444	3.9	6	4.90556	7.32778	9.33333	11.1111	15.4778	17.2778
28/1/2009	3.5	4.6	0.7	1.1	5.4	6.4	4.2	5.5	3.28889	4.32222	4.1	4.7	4.61111	7.33333	9.47778	10.5833	15.8	16.5222
29/1/2009	4.2	4.9	0.5	1.3	5.7	6.5	4.9	5.8	3.56111	4.84444	3.9	5.2	5.97222	7.56667	9.66111	11.3389	15.6889	17.6333
30/1/2009	3.4	4.9	-0.5	1.3	4.7	6.4	4.3	5.4	2.51667	4.64444	3.1	5	4.86667	7.7	8.12222	#N/A	14.1333	17.5
1/2/2009	3.1	4.7	-1.2	-0.2	5	6	3.9	5.5	3.54444	4.55	3.3	4.8	6.88333	8.03333	9.27778	10.7944	14.7778	17.3778
2/2/2009	3.6	3	-0.2	-1.6	5.3	5	4.1	4.6	3.45556	3.25	3.7	3.2	6.00556	6.66111	9.14444	9.80556	15.2	15.4111
3/2/2009	5.4	2.7	1.8	-1.6	6.7	4.6	5.4	4	4.63333	2.9	5.1	3.1	7.08889	6.1	10.2278	8.67222	16.7556	14.3778
4/2/2009	6	3.5	2.6	-1.1	7.5	5.8	5.8	4.5	5.81111	3.67222	5.7	3.8	7.56667	6.76667	11.6778	9.86667	18.4111	15.2667
5/2/2009	5.4	3.7	1.3	-0.7	6.7	5.9	5.8	4.7	5.27222	3.78333	5.5	4.3	7.83889	6.63333	11.5444	10.0889	17.8667	15.7222
6/2/2009	5.5	4.5	1.5	0.3	7	6.4	5.9	5.3	5.51667	4.46667	6	4.6	8.32222	6.79444	11.4444	10.4167	17.7333	16.5889
7/2/2009	3	4.3	-1.3	-0.1	5.3	6.3	4.3	5	3.36111	4.56667	3.6	4.5	6.66111	6.87778	9.28333	10.6333	14.9111	16.6667
8/2/2009	2.1	4.4	-2	0.6	4.9	6.2	3.8	5	2.12222	4.57778	2.6	4.9	5.28889	7.21111	8.21667	10.3722	13.6222	16.1333
9/2/2009	1.8	5.1	-2.2	1.5	4.2	6.6	3.3	5.4	2.15	5.33889	2.4	5.4	5.13333	8.03889	8.25556	10.4722	14.0333	16.3
10/2/2009	2.8	4	-0.9	1.3	4.9	6	4.1	5.2	2.99444	4.27222	3.4	4.3	5.73333	7.10556	8.8	9.75	14.6778	15.1222
11/2/2009	3.3	5.1	-0.4	1.5	5	7	4.3	6.1	3.22778	4.61111	3.6	5	6.33333	7.27778	9.01111	9.53889	15.0333	15.4556
12/2/2009	2.4	5.9	-1.6	1.7	4.3	7.9	3.8	6.8	1.84444	5.47222	2.4	5.7	4.75	8.45556	7.85	10.15	13.6778	16.1
13/2/2009	3.1	4.6	-1	0.1	5.5	7.2	4.3	5.9	2.44444	4.77778	3.2	4.6	4.98333	8.08889	8.17222	9.58889	14.2556	15.0444
14/2/2009	4	4.5	-0.2	0.7	6.2	7	4.7	5.7	3.6	4.33333	4.2	4.3	5.49444	7.45556	9.08333	9.16667	15.0667	15.2222
15/2/2009	3.7	5.3	-0.6	0.1	5.8	7.8	4.5	6.3	3.18889	5.23333	3.6	4.8	4.98333	7.66667	8.72778	10.65	14.7444	16.2111
16/2/2009	2.6	3.6	-2.2	-1	5	6.4	3.9	5	2.73889	4.06667	2.6	3.8	5.47222	6.96111	8.93889	10.2111	14.6111	15.6778
17/2/2009	1.3	5.8	-3.2	1.2	4	8.3	2.4	6.5	2.02222	6.3	1.7	6.2	4.91111	8.51667	8.47222	11.0944	13.9222	17.6333
18/2/2009	3.1	5.6	-1.9	1.3	5.6	8.2	3.8	6.7	3.22778	6.62778	3.5	5.8	5.28889	8.37778	8.62778	11.7	14.0889	18.4444
19/2/2009	4.1	5.7	-1.2	0.6	6	8.3	4.5	6.9	4.45556	6.18889	4.3	5.4	6.47778	8.60556	9.46667	11.2722	15	17.4556
20/2/2009	2.6	4.6	-2.7	-0.1	4.7	7.4	3.3	5.9	3.18333	5.26111	3	4.8	5.64444	8.38333	8.71667	11.2389	14.1667	16.9111
21/2/2009	2.9	6	-2.2	0.8	5.1	8.3	3.8	7	2.67222	6.00556	3.1	5.4	5.27222	8.39444	8.12778	11.3944	13.8889	17.1778
22/2/2009	2.5	6	-1.5	1	5	8.3	3.5	6.9	2.41667	6.18889	2.8	5.9	4.57222	8.85556	8.41667	12.1667	14.4667	17.7444
23/2/2009	4.1	7.6	-0.5	3.1	6.2	9.8	4.6	8.5	3.87778	7.27778	3.8	7.1	5.3	8.93333	9.32778	12.8389	15.6667	19.2889
24/2/2009	4.1	8.7	-0.7	3.4	6.3	10.9	4.8	9.1	3.57778	8.46111	4	8.3	5.91111	10.0556	9.10556	13.1667	15.4111	20.2
25/2/2009	2.8	7.3	-2.4	2.1	5.1	9.4	3.6	7.9	3.16667	6.92222	3	6.9	5.61667	9.24444	8.54444	12.3778	14.7556	18.7667
26/2/2009	3.4	7	-1.4	2.3	6	9.6	4.1	8.2	3.76111	7.28333	4	7	5.21667	8.63889	9.03333	12.6611	15.3111	18.7444
27/2/2009	5	6.9	-0.3	2.2	7.2	9.1	5.2	7.9	5.06667	7.16667	5.4	7.2	6.77778	9.00556	10.3722	#N/A	16.9222	18.3333
28/2/2009	4.8	8	-0.3	3.7	7	10.3	5.4	9.4	5.3	8.12778	5.2	8.2	7.02222	10.1444	10.85	#N/A	17.0667	18.9111
1/3/2009	4.3	7.8	-0.8	3.1	6.9	10.6	5.1	9.1	4.75556	8.27222	4.6	7.8	7.06111	10.3889	10.4278	12.5111	16.4444	18.5
2/3/2009	4	6.4	-0.4	1.3	6.1	8.7	4.7	7.9	3.98889	7	4.5	6.6	6.52778	9.48889	10.0611	12	16.4889	18.1222
3/3/2009	5	5.2	1.3	1.8	7.1	8.3	5.8	6.8	4.92778	5.92778	5	5.6	6.93333	8.78889	10.7611	11.8	17.4778	17.4778
4/3/2009	5.9	7.3	2.2	2.3	8	9.8	6.7	8.9	5.36111	7.85556	6.1	7.4	6.98333	10.5667	10.8833	12.6389	17.4	18.4667
5/3/2009	6.6	6.5	3.2	1.8	8.3	9.2	7.4	8	5.67778	7.56111	6.7	6.8	7.13333	10.2833	10.9667	12.9	17.8778	19.5111
6/3/2009	7.6	5.7	3.9	1.2	9.3	8	8.6	7.3	6.73889	7.3	7.6	6	8.7	9.96667	12.6	12.3444	19.3333	18.2222
7/3/2009	6.3	3.7	2.1	-1	8.3	6.3	7.4	6.1	6.12778	4.86667	6.6	4.2	7.60556	8	12.1056	11.1222	19.2778	16.6
8/3/2009	6	4.4	2.4	-1.2	8.3	6.8	7.5	6.3	5.71667	4.70556	6.3	4.4	7.72222	7.81111	11.2944	10.4778	17.8889	16.2111
9/3/2009	5.9	3.6	2.3	-1.2	8.3	6.1	7.5	5.4	5.72778	4.17222	6.4	3.9	7.78333	7.26667	11.3444	10.2611	18.1556	15.8222
10/3/2009	5.8	3.4	2.7	-2.1	8.8	5.5	7.9	5	5.51667	3.96667	6.1	3.4	7.66111	6.93889	11.5111	9.78333	18.1667	15.0333
11/3/2009	7	3.7	3.5	-1.3	9.7	6.4	8.2	4.7	6.48333	4.52778	7.1	4.5	8.63333	6.38333	12.3778	10.0444	19.0778	15.8222
12/3/2009	8.1	4.5	3.8	-0.5	10.5	6.7	9.5	5.5	7.71111	5.01111	7.9	4.9	9.66667	6.85556	13.0111	10.4944	19.7556	16.6778
13/3/2009	7.3	5.2	2.7	-0.2	9.9	7.5	9.1	6.3	7.25556	5.69444	7.3	5.2	9.76111	7.43333	13.3	10.8333	19.9222	17.1222
14/3/2009	6	4.7	1.3	-0.4	8.7	7	8.1	6	6.08889	5.68889	6.3	5	8.31111	7.66667	11.8444	11.1222	18.5444	17.5333
15/3/2009	7	4.8	2.5	-0.5	9.8	7	8.4	5.8	6.1	6.03333	7.3	4.9	8.27222	8.33333	11.1333	11.3722	17.1889	17.4
16/3/2009	8.8	4.2	3.9	-1.3	11.8	6.9	9.8	5.5	8.41111	5.28333	8.8	4.4	10.2	7.56667	12.4833	11.0111	18.3333	16.8333
17/3/2009	6.9	4.5	1.3	-0.6	9.7	7	8.4	6	6.95	4.55	6.9	4.8	9.35556	7.1	11.8722	10.5	18.0222	16.5778
18/3/2009	6.5	5.3	1.6	0	9.1	7.5	8.1	6	6.51111	5.28889	6.9	5.3	9	7.39444	12.1722	10.4111	18.6111	16.4556
19/3/2009	7.5	6	2.8	1.3	10.1	8.2	9	6.9	7.06111	6.19444	7.8	6.1	8.88333	8.07222	13.1944	11.6556	20.4667	17.9333
20/3/2009	7.1	6.9	2.3	2.6	9.6	9.6	8.8	8.1	6.95556	7.25556	7.4	7.4	9.48333	8.96667	13.3333	12.9167	20.0667	18.7222
21/3/2009	7.3	7.3	2.9	2.3	9.9	9.3	9.1	8.5	7.29444	7.71111	8	7.7	9.85	9.59444	13.3444	12.2889	20.0111	18.6444
22/3/2009	8.5	7.4	4.2	2.9	10.8	9.5	10.2	8.4	8.06667	7.36667	8.7	7.3	10.9611	9.26111	14.2333	12.2389	21.0222	18.6222
23/3/2009	7.5	7.3	2.6	3	9.7	9.9	9.1	8.8	7.00556	7.75	7.5	7.5	9.22778	9.56111	13.4167	12.2389	19.8333	18.9333
24/3/2009	6.8	7.1	2	2.7	9.4	9.5	8.5	8.5	6.48889	7.69444	7	7.3	9.33889	9.59444	12.2667	12.6222	18.2333	19.0667
25/3/2009	7.3	7.1	3.3	2.4	10.5	9.2	9.3	8.1	7.3	7.5	7.7	6.9	9.5	9.99444	12.1778	12.4833	18.7667	18.3667
26/3/2009	7.4	7.9	2.7	2.9	10.4	10	9.3	9	7.68889	7.96667	7.6	7.6	9.88333	10.5278	12.5778	12.6056	19.0222	18.6444
27/3/2009	7.7	7.5	3.1	3.1	10.4	10.4	9.3	9	7.73889	7.56667	8.2	7.7	10.6444	10.1667	13.2611	12.6556	19.8778	19.2556
28/3/2009	7.6	7.2	2.2	2.3	10	9.7	9.1	8.8	8.16667	7.27222	7.9	7.5	11.6333	10.0111	13.7944	12.9111	19.8778	19.4556
29/3/2009	5.1	6.3	-0.2	1.4	8.1	8.8	7.3	8	5.78333	6.44444	5.5	6.5	8.59444	9.40556	11.4444	12.1722	17.1667	18.5778
30/3/2009	6.3	7	1.4	2.4	9.3	9.9	8	8.7	6.30556	7.06667	6.4	7.5	7.99444	9.3	11.5111	#N/A	18.0444	18.1333
1/4/2009	5.4	6.2	0.4	2	8.5	8.7	7.7	8.3	6.08889	6.66667	5.9	7	8.91111	9.65	12.15	11.6667	18.5889	18.2667
2/4/2009	6.4	6.4	1.7	1.9	9.1	9.5	8.1	8.6	7.36667	6.78889	7	6.6	9.88333	8.96667	13.1056	11.4333	19.8333	17.2333
3/4/2009	6.8	6.4	2.7	1.7	9.6	9.5	8.3	8.4	7.60556	6.82778	7.4	6.7	9.61667	9.7	12.8722	11.8278	19.4889	17.5
4/4/2009	8.4	7.2	3.5	2.4	10.9	10	9.6	8.3	8.58333	6.96111	8.2	7.5	10.5111	9.49444	13.2556	11.5833	20.2111	18.1111
5/4/2009	8	7.1	3.3	2.1	10.7	10	9.6	8.8	8.02778	7.66667	7.9	7.4	10.1333	10.3722	12.4944	12.7	18.9	19.0444
6/4/2009	8.7	6.2	4.3	1.1	11.6	8.7	10.1	7.6	9.18889	6.82222	8.9	6.6	11.3889	10.0667	13.5556	12.7	20.1444	18.8556
7/4/2009	8.3	5.7	3.7	0.7	11.3	8.1	10	7.2	9.25556	5.87222	8.5	6	11.7111	8.83333	14.0556	11.7056	20.7667	17.5778
8/4/2009	6.8	6.4	2.4	1.4	10.2	8.8	8.7	7.5	7.31667	6.68333	7.3	6.5	9.94444	9.31111	12.5833	11.55	19.2778	18.2
9/4/2009	7	6.6	2.3	1.7	9.9	9.1	9	7.5	7.4	7.21667	7.3	6.9	10.5	9.67778	12.3611	12.0167	18.6556	18.3778
10/4/2009	7.7	7	3.4	2.4	10.6	9.9	9.2	8.1	8.33889	7.2	7.6	7.2	10.8667	9.65556	12.7278	11.9556	19.1778	18.4222
11/4/2009	8.4	8.4	4	3.5	11.1	11	10.3	9.4	9.23889	8.58889	8.5	8.1	11.5722	10.8889	13.45	12.5889	19.7667	19.0222
12/4/2009	8.4	7.4	4.3	2.5	11.3	9.5	10.3	8.2	8.72222	8.01667	8.8	7.6	11.4444	10.6056	13.3556	12.7333	19.8778	19.3444
13/4/2009	9.7	6.9	5.2	2.3	12.4	9.9	10.9	8.5	9.75	7.24444	9.4	6.8	12.0944	9.13889	13.9556	12.4556	20.7556	19.0111
14/4/2009	10.9	8.3	6.4	3.9	13.3	11.2	12.5	9.3	10.7056	8.27778	10.8	8.4	13.0111	10.2111	14.5833	13.05	21.5222	20.0778
15/4/2009	10.7	8.9	6.6	4.5	13.3	12	12.5	10.2	11.9167	9.29444	10.7	9.3	14.4944	11.45	16.1167	13.6444	22.9667	20.2889
16/4/2009	9.1	8	4.7	2.7	12.1	10.3	11.2	9.2	9.91667	8.73889	9.6	8	13.05	11.4667	14.4556	13.7833	20.9778	20.3333
17/4/2009	8.4	7.1	3.5	1.7	11.2	9.6	10.1	8.2	9.18333	7.44444	8.7	7.1	12.0889	10.4111	13.8389	12.3833	20.1667	18.4111
18/4/2009	8.4	7.9	4	3.2	11.6	10.3	10.4	9.1	9.06111	7.78889	9	8.3	11.8667	10.5222	13.9167	12.6111	20.5333	19.7333
19/4/2009	7.6	8.2	2.8	3.5	10.6	11.1	10.1	9.1	8.33333	7.92222	8.1	8.3	11.65	10.2722	13.7833	12.6444	20.1556	19.3556
20/4/2009	8.3	8.7	3.9	4.1	11	11.6	10.3	10	9.17778	8.15	8.8	8.6	12.0944	10.1056	14.3944	13.3111	21.0778	20.0333
21/4/2009	8.8	9.5	4.2	5.1	11.7	12.3	11.2	10.9	9.57222	8.95	9.2	9.2	12.6944	11.2167	15.1389	13.5444	22.1778	20.3111
22/4/2009	8.7	9.6	3.8	4.6	11.7	12.6	10.5	11.1	8.90556	10.0722	8.8	9.4	12.3778	12.5611	14.0444	14.1389	20.4667	20.6778
23/4/2009	9.7	9.4	4.6	4.7	12.6	12.6	11.2	11.2	9.51667	9.62778	9.6	9.9	12.3444	12.0444	14.0444	13.9278	20.2667	20.1556
24/4/2009	9.7	9.7	5	5.4	12.7	13.1	11.5	11.4	10.0389	10.0556	9.9	10.5	12.95	12.1944	15.1778	14.45	21.5889	21.3778
25/4/2009	9.3	11.7	4.9	7.1	12.4	14.8	11.1	12.9	9.87222	11.8444	10	12	12.95	13.5667	14.25	15.8278	20.2889	22.5778
26/4/2009	10.6	11.1	6.5	5.8	13.9	14.3	12.2	12.6	10.8444	11.65	10.8	11.1	13.5167	14.1556	14.7833	15.8833	21.0667	22.2444
27/4/2009	11.3	9.7	6.4	4.8	14.8	13.1	13.7	11.5	11.5444	10.2722	11.4	10	13.95	13.4778	15.0333	15.2444	21.7556	21.1889
28/4/2009	10.7	10	5	4.9	14	13	12.5	11.4	10.7611	10.2722	10.5	9.7	13.15	13.0111	14.2944	14.8111	19.9444	21.1
29/4/2009	8.8	9.8	3.1	5.5	11.6	13.4	10.5	10.9	9.65556	10.4944	8.6	10.2	12.7389	13.3278	14.3667	#N/A	19.7333	21.3444
30/4/2009	8	10.3	2.7	5.9	11.1	13.8	10	11.7	9.11667	11.1944	8.3	10.6	12.3222	13.6611	13.8556	#N/A	19.5556	23.0556
1/5/2009	9.3	10.2	4.2	5.6	12.2	13.7	10.3	11.6	9.76111	11.3278	9.2	10.7	12.4944	13.8833	13.7944	16.3278	19.2778	22.7222
2/5/2009	10.3	11.2	4.8	6.2	12.8	14.2	10.8	12.5	10.7056	11.6056	9.9	11.1	13.4056	14.05	14.5889	16.3833	20.1444	22.4222
3/5/2009	10.5	11	5.2	5.3	13	13.6	11.4	12.5	11.0111	10.4833	10.4	10.6	13.4389	13.4833	15.4722	15.3333	22.0333	20.9556
4/5/2009	9	9.5	3.6	4	11.9	12.5	10.6	10.9	9.83889	9.38333	9	8.8	12.5389	12.5167	14.3278	14.1611	20.4	19.7778
5/5/2009	9.4	10	4.3	5.1	12.7	13	10.8	11.6	10.3056	10.4389	9.2	9.5	12.4111	12.95	14.5222	14.3833	20.7444	20.4333
6/5/2009	9.7	11.1	4.5	6.1	12.7	13.9	10.5	12.3	10.4111	11.2056	9.5	10.3	12.9611	14.3778	15.1056	15.6944	21.7667	22.3889
7/5/2009	10.8	11.5	5.8	6.1	13.5	14.1	11.7	12.3	11.5611	11.8389	10.9	11	13.3667	14.7556	16.0278	16.7111	23.1	23.4889
8/5/2009	11.5	11.5	6.7	6	14	13.7	11.8	12.1	12.2556	11.7056	11.7	10.9	14.8333	14.6611	17.2667	17.1611	23.8444	23.8556
9/5/2009	10.2	10	5.1	4.6	12.8	12.8	10.7	11.2	11.5222	10.4722	10.6	9.9	14.9667	13.6667	16.8056	16.55	23.3111	22.9889
10/5/2009	9.2	9.7	4.2	5.4	12.5	12.9	9.9	10.7	10.2167	10.6222	9.2	10.1	12.8778	13.5333	15.3278	16.3889	22.0222	22.9444
11/5/2009	10.5	10.9	6.4	6.6	13.7	13.7	11	11.3	11.5611	11.3111	11.3	11.3	13.9167	14.25	16.0667	16.9389	23.4333	23.8667
12/5/2009	11.7	12.3	6.9	7.9	14.3	15.1	12.4	12.4	11.9667	12.1889	11.5	12.2	15.05	14.4278	16.7444	17.2389	23.7111	24.4222
13/5/2009	12.2	12.1	7.1	8.1	14.8	15.3	12.5	12.9	12.95	12.5167	11.8	12	15.7778	15.1222	17.3333	16.7722	24.5222	23.7333
14/5/2009	11.7	12.8	6.3	8	14.5	15.8	12.3	13.1	13.1278	12.2444	11.1	11.9	15.3722	15.1278	17.0056	16.3278	24.0667	22.8889
15/5/2009	11.4	13.7	6.1	9.7	13.9	16.8	12	14	13.0667	13.0667	10.8	13.1	16.0222	15.4889	17.3389	17.4556	23.5	24.1444
16/5/2009	10.4	14	4.7	9.6	12.8	17	10.4	15.2	11.6222	13.5556	10	13.3	14.4389	16.1833	16.3389	18.1667	22.5333	25.0222
17/5/2009	10.9	13.5	5.9	9.3	13.7	16.8	10.6	14.5	11.8889	13.7667	10.8	13.2	14.8167	16.3889	16.6222	17.5722	22.9556	24.4444
18/5/2009	11.7	13.9	7	9.7	14.3	16.6	11.9	14.7	12.5444	14.3944	11.5	13.4	15.4222	16.8333	17.2778	17.8222	24.0333	24.9222
19/5/2009	12.2	13.7	7.3	9.4	14.6	16.6	12.2	14.7	12.6778	14.2389	11.5	13.3	16.1	17.3611	17.6889	17.5722	24.7333	24.1111
20/5/2009	13.1	13	8.1	8.4	15.6	16.1	13.2	13.7	13.1167	12.9556	12.3	12.8	15.35	16.1667	17.1722	17.1278	24.1778	23.9
21/5/2009	14.3	12.8	9.5	8.7	16.9	16.1	14.1	13.8	14.3889	12.7	13.5	12.6	16.4111	15.3778	18.0111	17.3	25.1333	24.3
22/5/2009	13.9	13.5	8.7	8.8	16.7	16.4	14.3	14.2	13.8611	13.6056	13	13	16.4222	16.4056	17.5611	17.3889	24.3222	24.1111
23/5/2009	13.7	12.9	8.4	8.2	16.3	16	13.9	14.1	14.4222	13.3833	13.1	12.9	17.1	16.8167	18.15	17.5944	24.9	24.0222
24/5/2009	12.4	12.6	7.4	8	15	15.5	13.1	13.6	13.6944	13.0389	12.4	12.8	16.6056	16.0444	17.8944	17.3333	24.5	24.0444
25/5/2009	12.6	14.6	7.6	9.9	15.2	17.4	13.3	15.3	12.7667	13.7667	12.4	13.9	16.3333	16.6389	17.4611	17.6056	23.6667	24.4556
26/5/2009	13.8	14.9	8.7	10.7	16.5	17.6	14	15.7	13.4	14.85	13.1	14.6	16.3167	17.1944	17.5611	17.9667	24.2667	24.7333
27/5/2009	12.7	14.5	7.6	10.5	15.2	17.7	13.2	15.3	13.1667	15.2222	12	14.4	16.5111	17.8389	17.8389	18.6444	24.1	25.5778
28/5/2009	12.2	13.6	7.5	9.8	14.9	17.1	13.2	14.9	13.0056	14.5444	11.8	13.8	16.1222	17.2389	17.4833	18.5333	23.7556	26.0222
29/5/2009	12.8	13.7	8.1	9.8	15.7	17	13.9	15	13.5167	14.0389	12.2	13.9	16.3889	17.0611	18.0056	17.8556	24.6667	24.7889
30/5/2009	13.4	15.2	8.5	11.2	16	18.4	13.4	16.2	13.8389	15.05	12.6	14.7	17.0111	17.5278	18.7111	#N/A	25.7333	25.3667
1/6/2009	12.8	15.1	7.5	11.1	15.1	18	12.8	15.8	13.1833	15.8722	12.2	14.9	16.9444	18.6556	18.6167	19.4944	25.1667	26.3444
2/6/2009	13.3	14.5	8.5	10.1	15.7	17.1	13.2	15.4	13.1389	15.1944	12.5	14.3	16.5278	18.7278	17.9833	19.3	24.9667	25.5333
3/6/2009	14.2	15.3	9.9	10.4	16.7	18	14.2	15.8	14.3389	16.0389	13.5	14.7	17.5722	18.7889	18.9722	19.8222	26.0889	26.2667
4/6/2009	14.7	15.4	10.6	10.6	17.1	18.3	14.7	16.3	14.7833	15.8111	14.1	15.1	18.0611	18.8111	19.1333	20.0667	26.3556	26.9111
5/6/2009	15.8	15.6	11.8	10.9	18.4	18.6	16	16.3	15.6222	16.1667	15.5	15.2	18.4722	18.9778	19.8667	19.9944	26.7667	26.9333
6/6/2009	17.1	15.9	13	11.5	19.9	18.9	17.2	16.4	16.4778	16.1889	16.2	15.4	19.2556	18.7722	20.1889	19.7278	27.5333	27.1
7/6/2009	17.7	16.2	13.7	11.7	20.3	19	17.8	16.5	17.0278	16.0333	16.8	15.4	19.7389	18.9611	20.2944	20.0389	27.5444	27.4333
8/6/2009	17.5	17.4	13.5	13	20.3	20.5	17.7	17.3	17.1111	16.8	16.6	16.2	20.1333	19.9611	21.1	20.7611	28	27.5111
9/6/2009	17.6	17.8	13.5	13.5	20.5	20.5	17.6	18.2	17.1556	17.2778	16.9	16.7	20.2278	19.9944	21.3222	21.1944	28.2667	27.8667
10/6/2009	17.9	18.7	13	14.4	20.4	21.5	18	18.9	17.85	17.5778	17.1	17.2	20.9111	20.1778	21.7611	20.8944	28.6333	27.7778
11/6/2009	16.4	19.6	11.9	15.8	19.1	23	17.1	20.1	17.2556	18.5167	15.7	18.2	20.2611	20.6056	21.3667	21.4222	28.3	28.3333
12/6/2009	15.4	19.3	10.7	15.7	18.1	22.6	16.5	20.1	15.6667	18.8	15.3	18.3	19.5111	21.4444	20.1	21.9278	26.4111	28.5333
13/6/2009	15	19.1	10.4	14.1	17.8	21.6	16.2	19.9	15.0333	18.1278	15	17.5	18.7556	20.9222	19.35	21.2278	25.7333	27.5667
14/6/2009	15.6	18.8	11.5	14.1	18.5	21.9	16.5	20.2	15.7833	18.2889	14.9	17.5	19.0889	20.7889	20.1	21.2944	26.7333	27.6
15/6/2009	16.2	19.9	12.1	15.6	19.2	23.4	17.1	21	16.1167	19.3889	15.6	18.6	19.1611	21.5944	20.2111	22.2389	26.8	29.2556
16/6/2009	17	20.4	12.4	16.5	19.8	23.7	17.9	21.6	16.5667	20.3167	15.9	19.2	19.2722	22.5444	20.4722	22.9833	27.0444	30.2
17/6/2009	16.9	20.1	12.6	16.4	19.8	23	17.8	21.3	16.9611	20.35	16.1	19.1	19.8833	23.1167	21.1167	23.8389	27.7111	30.8444
18/6/2009	16.4	20.8	12.3	16.9	19.3	23.8	17.2	21.9	16.6056	20.2944	15.9	19.5	20.05	23.0278	21.1222	23.8111	27.8778	30.3222
19/6/2009	15.9	21.2	11.8	17.4	18.9	24.3	16.6	22.4	16.6278	20.2611	15.7	19.8	20.1444	22.8444	21.2889	23.2833	27.9778	29.7778
20/6/2009	16.4	21.3	12	17.2	18.8	24.2	16.8	22.6	17.2	20.3667	16	19.6	20.55	23.1056	21.4333	23.5556	27.8889	30.0222
21/6/2009	16.8	21	12.4	16.9	19.4	24.3	17.1	22.6	17.3333	20.2278	15.8	19.7	20.6389	23.2167	21.4333	23.6278	28.3222	30.0778
22/6/2009	16.6	21.2	12.3	17	19.4	24.7	16.9	22.6	17.0722	20.5556	15.4	19.5	20.4111	23.1722	21.7611	23.6	28.6667	30.2556
23/6/2009	17.2	21.4	12.9	17.4	20.1	24.6	17.5	22.5	17.2278	20.5556	16.1	19.7	20.5111	23.5389	21.5167	24.1667	28.4222	30.9333
24/6/2009	18	20.7	13.9	17	20.8	24	17.8	22.2	17.9222	20.0389	17	19.7	20.9333	23.3	21.9944	24.1278	28.9	30.8667
25/6/2009	18.8	20.2	14.9	16.3	21.6	23.6	18.6	22.1	18.5111	19.9778	17.4	19.2	21.3833	23.2444	22.4444	23.6333	29.3444	30.1111
26/6/2009	19	19.4	14.7	15.6	21.8	22.6	19.1	21.3	18.4056	19.3444	17.4	18.7	21.5222	23.0278	22.4611	23.5722	29.4	29.8111
27/6/2009	18.9	19	14.6	15.2	21.3	22.5	18.8	20.8	18.3111	19.2444	17.4	18.2	21.55	22.7444	21.9778	23.5	28.4333	29.8667
28/6/2009	19.5	20.2	15.3	15.8	22	23.5	19.6	21.5	18.95	19.7444	18	18.8	22.0167	22.7889	22.2	23.4	28.7222	29.6667
29/6/2009	19.9	19.8	15.8	15.6	22.9	23.1	20.3	21.3	19.5	20.1278	18.4	18.7	21.8278	23.2167	22.3444	#N/A	28.8111	30.9333
30/6/2009	19.9	18.5	15.8	14	22.8	21.5	20.5	20.1	19.8056	18.7222	18.8	17.6	22.4611	22.7889	23.2833	#N/A	30.0333	29.9444
1/7/2009	19.2	18.8	15.3	14.6	21.9	21.7	20	20.1	19.4667	19.1	18.3	18	22.6611	22.8056	23.75	23.3	30.3222	29.8
2/7/2009	19.7	19.5	15.9	15.9	22.2	22.2	20.4	20.7	19.7333	19.5111	18.7	18.8	22.7889	23.4	23.2278	23.95	30	30.8222
3/7/2009	19.9	19.5	15.8	15.9	22.2	22.5	20.4	20.7	19.65	19.6611	18.9	18.9	22.7111	23.8556	23.2778	24.6556	29.8444	31.5778
4/7/2009	20.5	18.6	16.8	15.5	23.4	21.7	20.9	20.1	20.1167	18.65	19.2	18.1	22.6833	22.8889	23.3889	23.6444	30.5333	30.1222
5/7/2009	20.8	19.2	17.3	16.1	23.7	22.3	21.5	20.8	20.5444	18.6056	19.5	18.4	23.0167	22.3167	23.8944	22.9611	30.9667	29.0222
6/7/2009	20	20	16.4	17.1	22.8	22.8	21	21.1	20	19.0222	19.2	19	22.9889	22.5556	23.7167	23.1278	30.6222	29.8222
7/7/2009	20.6	21.1	17.4	17.7	23.4	23.9	21.4	21.9	20.3222	20.2389	19.6	19.8	23.3944	23.45	24.0389	23.3889	31.2556	30.2
8/7/2009	21	20	17.9	16.6	23.9	23.3	21.7	21.2	21.1167	20.0278	20.2	19.1	24.1222	23.3111	24.8	23.3889	31.8333	30.0444
9/7/2009	20.7	19.7	17.8	16.5	23.7	22.8	21.9	20.5	20.8111	20.2389	20.1	19	24.0278	23.1778	24.3167	24.1	30.8556	31.1
10/7/2009	20.6	20.7	17.6	17.7	23.5	23.6	22.4	21.5	20.5222	20.8	20	19.8	23.5722	23.7778	23.8056	24.2611	30.6	31.0111
11/7/2009	20.9	20.6	18	17.3	23.8	23.6	22.6	21.7	21.0833	20.5111	20.1	19.7	23.9833	23.8722	24.2833	24.5389	30.9333	30.9222
12/7/2009	21	20.3	18.1	16.6	23.9	23	22.3	21.3	21.3833	20.5333	20.3	19.3	24.6444	23.6333	24.8722	24.0444	31.4	30.7444
13/7/2009	21.2	20.9	18.2	17.1	24.2	24	22.2	22	21.1667	20.45	20.3	19.5	24.5333	23.6722	24.8556	24.3944	31.7556	31.5778
14/7/2009	21.4	22	18.3	18.9	24.5	25	22.4	22.8	21.5111	21.2778	20.5	20.6	24.4556	23.9833	24.9833	24.5667	31.8333	31.3889
15/7/2009	22.3	23	18.8	19.7	25	25.8	23	23.5	21.9389	21.9833	20.7	21.2	24.9722	24.5	24.9556	25.0333	31.8556	32.1889
16/7/2009	22.5	23.7	19.4	20.7	25.3	26.6	23.2	24	22.4	22.5833	21.3	21.7	25	25.25	25.2389	25.6667	31.9333	32.9222
17/7/2009	23.6	24.1	20.1	21	26.1	26.9	24.2	24.6	22.85	22.8833	21.9	22.2	25.5	25.4389	25.5556	26.1444	32.4889	33.3
18/7/2009	23.8	23.2	20.5	20.2	26.1	25.9	24.5	24.5	22.9111	22.5556	22.1	21.8	25.9278	25.9611	26.05	26.2778	32.9	33.2222
19/7/2009	23	21.9	19.8	18.5	25.4	24.7	24.4	23.5	22.6556	21.2611	21.7	20.9	25.8556	24.7	25.9167	25.0944	32.8778	31.6111
20/7/2009	22.8	22.3	19.8	19	25.3	25	24.4	23.8	22.5333	21.5167	21.5	21	25.75	24.9222	25.5444	25	32.3	31.6667
21/7/2009	22.1	22.4	19	19.2	24.5	25.2	23.7	23.7	22.3889	22.1556	21.2	21.3	25.8944	25.4278	25.7389	25.5333	32.1444	32.3778
22/7/2009	19.9	21.3	16.5	17.5	22.7	24.1	22.1	22.9	20.6944	21.6944	19.6	20.6	24.8667	25.2222	25.3111	25.6	31.9778	32.3889
23/7/2009	18.9	20.7	15.8	17.2	22.3	23.3	21.3	22.4	19.6	20.8167	18.7	20.1	23.2778	24.6556	23.8611	24.8222	30.1333	31.1889
24/7/2009	18.9	20.9	16.4	17.5	22.3	23.6	20.7	22.6	19.6333	20.6111	18.5	19.9	23.3944	24.1778	24.1	24.5111	30.9444	31.3222
25/7/2009	20.5	20.8	17.8	17.8	23.5	23.6	21.7	22.4	20.3778	20.7722	19.3	19.9	24.0056	24.4611	24.65	24.4611	31.5889	31.1778
26/7/2009	21.1	20.3	18.4	17.5	23.8	22.9	22.7	21.8	20.55	20.4278	20	19.5	24.0833	23.9056	24.6833	24.2611	31.3444	30.9222
27/7/2009	20.9	19.8	18.1	16.7	23.8	22.7	22.6	21.7	20.6167	19.7833	20	19.1	23.8611	23.0389	24.2444	23.6722	30.9667	30.2444
28/7/2009	20.8	20.6	18.1	17.4	23.5	23.5	22.3	22	20.5667	20.5611	19.9	19.7	23.5667	23.5833	24.0778	23.8667	30.6333	30.4444
29/7/2009	20.9	21.1	18.1	18.3	23.7	24.3	22.5	22.5	20.4167	21.2889	19.8	20.5	23.6778	24.0722	24.2	24.3833	30.8889	31.2444
30/7/2009	21.7	20.4	19.4	17.7	24.3	23.6	22.7	22.2	21.0667	21.0167	20.4	20.2	24.0333	24.1778	24.6222	#N/A	31.8333	31.0444
1/8/2009	22.8	20.4	20.4	17.3	25.8	23.4	23.6	21.8	22.4056	21.0111	21.5	19.8	25.15	24.3222	25.3611	24.45	32.4556	31.1889
2/8/2009	23	20.7	20.7	17.7	26.1	23.9	23.8	21.9	22.4944	21.15	21.6	20.1	25.0389	24.3111	25.4944	24.4222	32.7889	31.1444
3/8/2009	22.8	20.7	20	17.9	25.5	23.8	23.4	22	21.7889	21.7611	21.6	20.2	24.85	24.5778	25.1722	24.8111	32.1667	31.6889
4/8/2009	22.4	21	19.2	18.4	25.4	24	23.1	21.7	22.0722	22.1056	21	20.4	25.1	25.1611	25.2222	25.3	32.1778	32.0889
5/8/2009	21.5	21.5	18.3	19.4	24.8	24.7	23	22.2	21.6222	22.8111	20.7	20.9	24.7333	25.5722	24.8611	25.5	31.9556	32.7111
6/8/2009	21.3	21.1	18.5	18.8	24.5	23.8	22.5	22.1	21.4556	22.55	20.7	20.7	24.5667	25.9056	24.9944	25.6333	32.5111	32.6778
7/8/2009	21.5	20.1	18.7	17.7	24.6	22.7	22.8	21.8	21.7389	21.5889	20.7	20	24.7944	25.1722	25.0333	25.0056	32.0333	31.7778
8/8/2009	21.3	20	18.9	17.5	24.3	23	22.6	21.4	22.0389	21.2444	20.9	19.9	24.7722	24.7778	25.4278	24.7611	32.3222	31.3
9/8/2009	21.9	19.6	19.3	17.3	25	22.6	23.3	20.8	22.0833	20.9444	21.1	19.5	25.3278	24.4833	25.75	24.2111	32.7222	31
10/8/2009	22.6	20.3	20	17.8	25.7	23.3	23.6	21.4	22.5111	21.5944	21.5	20	25.2722	25.0111	25.4056	24.6389	32.3444	31.7111
11/8/2009	22.8	20.7	19.8	18.5	25.9	23.5	23.5	21.3	22.3167	21.8389	21.3	20.2	25	25.3889	25.1056	25.0056	31.9778	32.1444
12/8/2009	22.5	21.2	19.7	18.8	25.8	24.4	23.7	21.8	22.4444	21.5167	21.4	20.5	25.2556	24.7611	25.1167	24.8222	32.0556	31.4778
13/8/2009	22.5	21.7	19.9	19	25.6	25.1	23.6	22.2	22.9333	21.5	21.4	20.9	25.5833	24.6611	25.3556	25.0111	32.2444	31.9
14/8/2009	22.2	22.2	19	19.8	25.3	25.1	23.1	22.3	22.6778	22.0333	20.9	21.5	25.4667	25.3944	25.5056	25.45	32.7444	32.6778
15/8/2009	21.3	22	17.7	19.3	24.2	24.7	22.3	22.3	21.1833	21.9167	20.2	20.8	24.9444	25.1611	25.0944	25.5778	32.1444	33.0222
16/8/2009	21.7	21.1	18.1	18.8	24.3	24.2	22.4	21.8	21.3778	21.5111	20.4	20.4	24.9	25.0278	24.7833	25.3444	32.1333	32.4222
17/8/2009	20.7	20.5	17.8	17.9	23.7	23.7	21.9	21.5	21.5667	20.8056	20.2	20.1	25.1222	24.6389	25.2778	24.7889	32.2222	31.5333
18/8/2009	19.2	21.3	16.1	18.2	22	24.1	21	21.8	20.9833	21.0722	19.2	20.3	24.6056	24.7556	25.3056	24.8	32.1889	31.6333
19/8/2009	18	20.8	15.1	17.5	21.2	23.7	20.2	21.8	19.8222	21.2667	18.5	20.1	24.0556	24.9389	24.6889	24.8944	31.6	31.9222
20/8/2009	18.5	19.8	15.7	17	21.9	23.2	20	20.9	19.8222	20.4278	18.6	19.5	23.5833	23.9	24.1778	24.2944	30.7444	31.5111
21/8/2009	19.7	19.6	16.9	17.1	22.9	22.8	20.8	20.7	20.1	19.7278	19.1	18.9	23.7778	23.1333	24.2167	23.8722	31.1444	30.9778
22/8/2009	19.6	19.5	16.6	16.7	23.1	22.4	20.4	20.8	20.0444	18.9222	18.7	18.5	23.3889	22.5889	23.6444	23.7333	30.6778	30.2444
23/8/2009	19.6	20	16.5	17.5	22.6	23.1	20.3	21	19.7222	19.2556	18.9	18.9	23.0889	22.1944	23.7444	23.1556	30.7111	30.0333
24/8/2009	19.1	19.4	16.7	16.9	22.1	22.5	20.1	20.7	19.2833	18.9611	18.6	18.8	22.6944	22.2444	23.6667	22.8611	30.5778	29.8111
25/8/2009	19.3	19.7	17.1	16.7	22.4	22.9	20.1	20.8	18.9667	19.5333	18.5	18.4	22.5167	22.2722	23.1389	22.7778	29.9667	29.5111
26/8/2009	20.4	19.4	17.8	15.8	23.5	22.6	20.6	20.3	19.7778	19.1111	19.3	18.2	23.0556	22.1	23.6111	22.3944	30.6444	28.7778
27/8/2009	19.6	19.6	16.7	16.3	22.5	23.3	20.2	20.8	19.6111	19.3667	19	18.6	23.35	21.9389	23.7722	22.6278	30.6778	28.9556
28/8/2009	18.1	20.5	15.4	17	21.4	23.7	19.2	21	18.6	19.6389	18	18.9	22.9278	22.3444	23.5833	22.9222	30.6889	29.4111
29/8/2009	18.1	20.2	15.5	16.7	21.3	23.5	19.2	20.7	18.45	19.7278	17.6	18.8	22.2333	22.6278	22.6667	23.0056	29.4222	29.6667
30/8/2009	18.8	20.9	16.2	18.2	22	23.8	19.7	21.1	18.8778	19.9944	18.1	19.3	22.6889	22.9222	23.3056	#N/A	30.4667	30.2778
1/9/2009	18.3	18.6	16	15.7	21.2	21.9	19.7	19.5	17.8111	18.9889	17.9	18	21.5	22.6	22.5944	22.8333	29.6	29.5333
2/9/2009	18.7	17.9	16.3	15.1	21.6	21.4	19.5	19.2	17.8444	18.1944	17.7	17.5	21.8333	22.1389	22.6722	22.5389	29.7111	29.6222
3/9/2009	18.1	18	15.6	14.9	20.8	20.9	19.3	19.1	17.7333	18.6833	17.2	17.5	21.65	22.6	22.6056	22.9	29.3556	30.1444
4/9/2009	18.1	17.8	15.4	14.4	20.8	20.3	18.6	18.5	17.7611	18.0278	16.9	16.9	21.0278	22.0389	22.3	22.6111	29.0444	29.6889
5/9/2009	19.2	18.3	16.6	15	22.3	21.3	19.4	18.9	18.5	18.0278	18.2	17.2	22	21.6278	22.5611	22.55	29.3667	30.0778
6/9/2009	20.5	19	17.5	15.9	23.4	21.9	20.2	19.1	19.7389	18.7444	19	18.3	22.9889	22.6	23.3111	23.3556	30.5556	30.6667
7/9/2009	20.4	19.8	16.4	17	23	22.6	20.1	19.6	19.1778	19.8333	18.8	18.9	22.5056	23.2	22.7333	24.0222	29.5889	31.4444
8/9/2009	19.8	18.4	16.2	14.8	22.5	21.2	19.4	18.7	18.6889	18.6222	18.2	17.6	22.1722	22.6667	22.5833	23.6333	29.4222	30.8778
9/9/2009	18.7	17	15.1	13.2	21.6	19.8	19	17.5	18.4833	17.3222	17.3	16.4	22.2333	21.6333	22.5222	22.6444	29.4	29.7556
10/9/2009	18.2	16.5	14.5	12.7	21.3	19.3	18.8	17	18.3611	17.0667	17.3	15.7	22.2278	21.2611	22.2444	22.2222	28.6667	28.8667
11/9/2009	18.4	17.3	14.3	13.2	21.3	19.6	18.9	17.5	17.9222	18.15	17	16.6	21.8222	21.8778	21.6722	22.1	28.2222	28.5333
12/9/2009	18.1	16.8	14.5	12.4	21.1	19.4	19	16.7	17.6778	17.4444	17	16.2	21.4333	21.7556	21.3056	22.3111	27.9556	29.4111
13/9/2009	18.5	15.6	15.1	11.4	21.4	18.5	19	15.9	18.0556	16.4556	17.3	14.9	21.3944	20.5278	21.35	21.8444	28.0667	28.4444
14/9/2009	18.9	15.1	15.8	10.7	21.9	17.7	19	15.3	18.1444	15.3667	17.7	14.2	21.5444	19.6278	22.1056	20.8167	29.2111	27.7667
15/9/2009	18.2	14.8	14.9	10.7	21.1	17.7	18.8	15	17.5167	15.6111	16.8	14.4	21.3056	20.0056	21.65	20.65	28.7444	27.7667
16/9/2009	18.6	14.6	14.8	10.8	21.7	17.7	19.1	14.8	17.5444	15.6056	17.2	14.4	21.3111	19.9056	21.4056	20.9278	27.6889	27.4333
17/9/2009	18.1	13.6	14.1	9.3	21	16.4	18.8	13.8	18.0722	15.1444	16.8	13.6	21.4556	19.55	21.5278	20.8944	27.9222	26.8111
18/9/2009	16.5	13	11.9	8.8	19.4	16	16.9	13.1	16.9667	14.4556	15.7	12.9	21.1389	18.45	21.3778	19.7167	28.4222	25.6778
19/9/2009	15.5	13.9	10.7	10.3	18.1	16.9	16.2	13.5	15.9778	14.8833	14.8	13.7	19.8556	18.2278	21.0722	19.5667	27.9667	25.9667
20/9/2009	15.2	14.8	11.4	11.4	18.2	17.8	16.3	14.6	15.05	14.9389	14.4	14.2	19.1944	18.5889	20.6833	19.8	28.4889	26.5333
21/9/2009	17.6	15.9	13.7	12.6	19.9	18.9	18	15.4	16.3889	15.5667	16	14.8	20.3333	19.0056	21.3333	20.2389	28.1	27.2667
22/9/2009	18	16.5	13.5	13.2	20.3	19.2	17.9	16.1	17.3667	16.0444	16.3	15.6	20.7778	19.9833	21.7722	20.6667	28.6	27.9556
23/9/2009	16.9	15.3	13.1	12.3	19.3	18.3	17.1	15.1	16.75	15.9111	15.6	15.1	20.3667	19.7278	21.1833	20.2222	27.8	27.3667
24/9/2009	16.6	15.1	13	11.9	19.4	18	17	15	16.3778	15.3278	15.8	14.8	19.9722	18.9833	20.8056	20.0556	27.7556	27.2
25/9/2009	16.3	15.7	12.1	11.7	19	18.2	16.2	15	16.1778	14.5778	15.2	14.3	19.7722	18.0444	20.7444	19.2	27.5556	25.9111
26/9/2009	16.4	14.8	12.1	10.4	18.8	17.1	16.2	14.4	16.4167	13.9	15.3	13.5	20.1278	17.2778	21.3444	18.7556	28.3444	25.0889
27/9/2009	15.4	15	11.2	10.2	17.5	17	15.5	14.4	16.0222	14.0944	14.4	13.9	19.9389	17.3722	20.7722	18.6111	27.4556	24.8111
28/9/2009	14.4	14.4	10	10	17	17	14.5	14	14.85	13.8833	13.6	13.4	18.6667	17.15	20.2444	18.8556	26.8667	25.5889
29/9/2009	13.3	14.7	8.1	10.2	15.9	17.1	13.8	14.3	14.0056	13.7167	12.6	14	18.0889	16.7944	19.9	#N/A	26.1889	26.4
30/9/2009	13	15.2	8	11.1	16	17.6	12.9	14.5	12.8833	14.2167	12.3	14.1	17.1611	17.3778	18.8389	#N/A	24.9778	26.3
1/10/2009	14.1	15.5	8.7	11.7	16.4	18.2	13.8	15	13.3278	14.6722	12.7	14.2	17.0278	18.0667	18.9444	20.0722	25.3111	27.0778
2/10/2009	13.5	14.8	8.9	11.6	15.9	17.3	13.3	14.5	12.5667	14.0667	12.2	13.9	15.9944	17.5667	18.1056	19.2222	25.1	26.5778
3/10/2009	14.2	15.3	9.9	11.7	16.7	17.5	14	15	13.4778	14.2222	13.1	13.9	16.8778	17.5611	19.0111	18.6611	25.8889	25.5889
4/10/2009	15.4	15	10.8	11.4	17.6	18.1	15	15.3	14.1944	14.9056	14	14.2	17.7	17.9167	19.3944	19.0889	25.9111	25.8222
5/10/2009	14.7	15	10.4	10.5	16.7	17.7	14.1	15.2	14.3556	14.1111	13.4	13.8	17.4389	17.7611	19.3722	18.8556	25.9778	24.8556
6/10/2009	15.1	15.3	10.9	10.3	17.5	17.2	14.3	15.1	14.8444	13.9778	13.9	13.6	18.4833	17.7944	19.6278	19.2	26.4333	25.3111
7/10/2009	16.1	15.9	11.1	11	18.4	18.4	15	15.8	15.45	15.1	14.5	14.7	18.8444	18.3056	19.8667	19.8556	26.5556	26.1222
8/10/2009	15.4	13.7	10.8	8.6	17.7	15.9	15.2	13.9	14.9556	14.2556	13.9	13.1	18.5556	17.9222	19.8	20.2111	26.0778	26.7889
9/10/2009	14.1	11.5	9.4	6.8	16.6	13.8	14.2	12.4	13.9167	11.7889	13	10.8	17.8389	16.0778	18.9	17.8056	24.8333	23.8222
10/10/2009	13	13.5	8.3	8.7	15.8	15.6	13.5	13.2	13.3056	12.6167	12.6	12.1	17.4556	16.4389	18.1333	17.5611	24.1778	24.0111
11/10/2009	14.4	14.3	9.3	9.6	17.2	16.7	14.4	14.2	14.0667	13.5944	13	12.7	17.6722	17.0556	18.2444	17.8667	24.2111	24.9556
12/10/2009	14.7	13	9.4	8.8	17.3	15.5	14.6	13.1	14.3389	13.2	13.2	12.2	17.8111	16.7278	18.4389	18.2111	24.1444	24.5222
13/10/2009	13.8	12	8.3	7.8	16.2	14.6	14	12.2	13.4611	12.0444	12.5	11.4	16.9	16.2222	18.1833	17.4944	23.9333	23.6444
14/10/2009	12.4	11.7	7.8	7.5	15.1	14.3	13	12.1	12.2278	11.4056	11.5	11	15.8222	15.7333	17.1778	16.7333	22.8667	22.7111
15/10/2009	12.8	11.1	8.4	5.9	15.4	13.5	12.9	11.8	11.9611	11.0944	11.5	10.6	15.2389	15.3	16.4278	16.1111	22.0556	21.6222
16/10/2009	13.5	10.8	8.8	5.1	15.5	13.1	13.1	11.2	12.8556	10.7167	12	9.6	16.05	14.0778	17.1278	15.7	23.0222	21.5667
17/10/2009	13.4	11.7	8.7	5.6	15.6	13.7	12.9	11.5	13.0889	11.2222	12.3	11.2	16.8278	14.2833	18.0944	16.1444	24.4889	22.4111
18/10/2009	12	10.4	7.8	4.6	14.4	12.7	12.2	10.7	11.7111	10.2889	11.2	9.8	15.7889	13.8389	17.7222	15.3167	24.5556	21.3
19/10/2009	11.9	9.7	7.2	3.8	14.1	11.9	12	10	11.3056	9.8	10.8	9.4	14.8444	13.2056	17.1278	15.1389	23.8667	21.0444
20/10/2009	12.3	9.7	8	4.1	14.3	11.6	12.1	10	11.5333	9.66111	11.4	9.3	14.4778	12.7056	17.45	15.0111	24.4111	20.8889
21/10/2009	12.7	10.2	8.4	4.9	14.2	12.4	12.5	10.4	12.0667	10.0611	11.9	9.7	15.7667	12.7778	17.8833	14.9278	24.8	20.2667
22/10/2009	12.7	9.5	8.1	3.7	14.3	11.8	12.5	9.7	11.3278	9.53889	11.2	9.4	14.9389	11.7444	17.2278	14.9944	23.6667	20.5444
23/10/2009	11.5	10.8	6.8	5.7	13.1	12.5	11.8	10.5	10.55	10.1167	10.2	10.4	14.1333	12.2944	16.5833	15.7556	22.7111	22.1
24/10/2009	11.7	11.4	7.1	7.7	13.8	13.4	11.9	10.9	10.2056	11.0444	10.4	11.1	13.2556	12.6778	15.8889	16.1556	22.1	23.4667
25/10/2009	12.2	11.1	8.5	6.1	14.3	12.9	12	10.7	11.4556	11.0944	11.4	10.5	14.3778	13.4333	16.55	15.8111	22.8333	22.2556
26/10/2009	11.5	9	6.9	3.5	13.3	10.9	11.6	9	11.0611	8.74444	10.8	8.5	14.45	11.9	16.2556	14.25	22.3667	19.3889
27/10/2009	9.6	7.5	4.7	2.8	11.1	9.7	9.7	7.8	9.10556	7.66667	8.9	7.3	12.5333	10.8944	14.6722	13.4444	20.2333	18.7556
28/10/2009	8.6	6.9	4.1	2.6	10.9	9.3	9	7.2	8.13889	7.87222	8.3	7.2	11.15	10.6056	13.4167	13.2889	19.3778	19.5333
29/10/2009	9.5	8.6	4.9	3.5	11.5	10.6	9.3	8.3	8.51111	8.79444	8.7	8.3	11.2889	11.4889	14.5778	13.5778	20.7	19.5
30/10/2009	9.3	8.8	4.6	3.7	10.9	10.5	9.5	8.8	8.25556	8.63889	8.6	8.3	10.8889	11.8944	14.3611	#N/A	20.3667	19.2556
1/11/2009	10.6	7.2	6	2.9	12.1	9.1	10.4	7.4	9.01667	7.45	9.4	6.7	11.0833	10.3722	14.5778	12.8	20.6444	18.7667
2/11/2009	9.6	7.6	4.7	2.8	11.2	9.5	9.3	7.5	9.11111	7.42222	9.2	7	11.8222	10.7556	14.7056	13.2556	20.5	19
3/11/2009	7.9	7.8	3.2	3.3	10.1	9.5	8.7	7.3	7.60556	7.42778	7.5	7.2	10.2333	10.3611	13.5944	13.2	19.5889	19.1111
4/11/2009	6.7	7.6	2.2	3.3	8.6	9.1	7.5	7.2	6.93333	7.35556	6.2	7.3	9.7	9.91111	12.5444	13.4222	18.3222	19.7778
5/11/2009	7.1	5.7	2	2	8.8	7.5	7.5	6	7.01111	5.65	6.3	5.4	9.96111	8.2	11.7833	12.0556	17	17.9111
6/11/2009	6.8	6.3	3	2.8	8.5	7.9	7.6	6.5	6.99444	5.78889	6.5	5.6	10.1	7.66111	12.2222	12.0778	17.2444	18.3222
7/11/2009	7.3	6.5	4.3	3.7	9	8.1	7.6	6.9	6.57778	5.81111	6.6	6	9.82222	8.35	12.0667	11.8833	17.6667	17.9333
8/11/2009	8.4	7.9	4	4.1	10.3	9.6	8.6	7.5	8.10556	7.17222	7.3	7.1	10.35	9.59444	12.95	12.4167	18.3111	18.2111
9/11/2009	8.4	7.3	3.1	3.9	10.1	9.1	8.3	7	8.11667	6.92222	7.9	6.5	11.0167	9.08889	13.0833	12.2444	18.6	18.0333
10/11/2009	5.8	7.9	1.7	4.6	7.8	9.4	7	7.5	6.54444	7.51111	5.9	7.1	10.2	9.01667	12.4333	13.1611	17.9889	19.5444
11/11/2009	6.5	8.5	2.3	5	7.9	10.5	7	8.2	6.29444	8.35	6.5	8.2	9.16111	9.81111	12.2556	13.1778	17.5778	19.8556
12/11/2009	7.1	6.7	2.1	2.6	8.9	8.2	7.6	6.8	7.31111	6.80556	6.8	6.4	10	9.17222	12.5556	12.35	17.6111	18.9
13/11/2009	5.5	6.7	2	3.3	7.8	7.9	6.5	6.8	5.42222	5.98889	5.8	6.4	7.97778	8.74444	11.6	11.8389	17.4	17.6111
14/11/2009	7.4	6.5	3.4	3.6	9.1	7.7	7.3	6.7	6.51667	5.34444	7.2	6.1	8.70556	7.37778	11.5667	11.8778	17.5222	17.9
15/11/2009	7.1	8.2	2.4	5.6	8.5	9.5	7.2	7.5	7.43889	6.87778	7.2	7.3	9.67778	8.23333	12.45	13.1556	17.3333	19.3333
16/11/2009	5.3	8.1	1.4	4.4	7.2	9.5	5.4	7.8	5.77778	7.23889	5.5	7.7	8.36111	9.22778	11.3556	13.3889	16.3889	19.7333
17/11/2009	4.9	7.1	1.1	4.2	6.7	8.4	5.4	6.9	5.98333	6.75	5.2	7	8.55556	8.30556	11.0444	13.0056	15.8556	19.2
18/11/2009	3.1	7.2	-0.2	4.5	5.2	9.5	4.5	7.5	4.16667	7.36111	3.8	7	7.22778	8.87222	9.52222	13.2056	14.6222	19.1778
19/11/2009	3.8	6.6	0.5	2.8	6	8.3	4.9	6.7	4.05	6.57222	4.2	6.7	6.44444	9.07778	9.41111	12.7056	14.8222	18.3778
20/11/2009	4.1	5.9	1	2.1	5.5	8	4.5	6.4	4.16667	6.65	4.2	6	7.06667	9.12778	9.78333	12.4667	15.3556	18.1111
21/11/2009	3.2	5.8	1	1.8	4.7	7.3	4.1	6	3.44444	5.55	3.2	6	5.90556	8.1	9.15556	11.8833	14.8556	17.2
22/11/2009	4.4	6.8	1.5	2.9	6	8.5	4.6	7.1	4.35	6.59444	4.3	6.9	6.53333	9.13889	9.94444	12.2111	15.3222	17.7333
23/11/2009	4.1	7	1.6	2.9	5.8	9	4.6	7.5	4.50556	6.93889	4.7	7.5	6.35556	9.26667	10.2778	12.5444	15.7	17.9
24/11/2009	5.3	5.9	2.3	2.8	6.5	7.7	5.3	6.2	4.83333	5.89444	5.3	5.7	6.32222	8	10.7222	11.5444	16.4222	17.2444
25/11/2009	5.3	5.2	1.8	1.4	6.7	6.4	5.3	5.7	5.23333	4.74444	5.5	4.6	6.97778	7.31111	10.7111	10.4	16.0667	15.6556
26/11/2009	6.1	4.7	2.9	0.6	7.6	6.4	5.9	5.5	5.66111	4.03889	6.2	4.4	6.86667	6.73889	11.1389	10.0944	16.3556	15.0778
27/11/2009	6.5	3.9	3.1	-0.3	7.4	5.8	6	4.9	5.88889	3.93889	6.1	4	6.76111	5.43889	11.5667	9.75	17.5333	14.8
28/11/2009	5.3	3.4	2.3	-0.8	7	5.3	5.5	4.3	4.55556	3.22222	5.2	3.1	5.78889	5.53889	10.8611	8.88889	17	13.6556
29/11/2009	5.5	3.3	2.5	-1.8	6.7	4.8	5.5	4.1	4.77222	2.80556	5.1	3.1	5.45556	4.97778	11.2278	#N/A	17.4333	13.3222
30/11/2009	5.2	4.4	2.5	0.1	6.7	6	5.4	4.7	4.77222	3.66111	4.7	4.1	5.22778	5.78889	11.1833	#N/A	17.1778	14.3
1/12/2009	6.6	5.6	2.6	0.4	8.3	6.9	6.3	5.6	5.8	5.06111	6.2	5.6	6.99444	6.59444	11.5389	10.0667	17.0222	15.6778
2/12/2009	4.7	3.6	1.1	-0.6	6.5	5.2	5.1	4.6	4.65556	3.74444	4.9	3.7	6.13333	5.71111	10.7944	9.48333	16.1667	14.9556
3/12/2009	5	4.2	1.2	-0.4	6.9	5.5	5.4	4.6	5.16111	3.75556	5.5	4.3	6.61667	5.68889	10.9111	9.46667	16.1556	14.3111
4/12/2009	5.6	4.5	1.7	1.2	7	5.6	5.7	4.8	5.5	3.88889	6	4.2	7.06667	5.78333	11.1833	9.81667	16.7444	14.8111
5/12/2009	5.9	5.2	1.2	1.9	7.3	6.5	6.1	5.3	5.97222	5.26667	5.7	5.2	8.25	6.1	11.3056	11.1056	16.7	16.6778
6/12/2009	3.4	6	-1.2	2.4	5.2	7.7	4.4	6.1	4.03333	5.52778	3.7	5.8	7.55	6.92778	9.93333	10.6944	14.3667	15.9
7/12/2009	1.8	4.8	-2.4	0.9	3.7	6.4	3.4	5	2.59444	4.78889	2.3	4.9	5.16667	6.92778	7.88333	10.6389	12.1667	15.1778
8/12/2009	3.1	4.1	-0.7	0.2	5	6.2	4	4.6	3.59444	4.22222	4.1	4.3	5.57222	6	8.56667	9.83333	13.3556	14.6556
9/12/2009	4	4.3	-0.2	0.4	5.1	5.7	4.7	4.6	4.13889	3.97778	4.5	3.8	6.91111	5.42778	9.5	9.67222	14.4889	14.8333
10/12/2009	5	5.3	1.1	1.7	5.9	6.7	5.3	5.4	4.85	4.75	5.4	5.1	6.78889	5.88333	10.2556	10.6444	15.6111	16.2333
11/12/2009	5.2	4.7	1	1	6.4	6.1	5.7	5.3	4.8	4.1	5.1	4.2	6.48889	6.35	10.3667	10.6111	15.6556	15.7222
12/12/2009	4.4	3.7	0	-0.4	5.4	5.5	4.8	4.5	3.77222	3.48333	4	3.4	4.8	5.63889	9.25	9.2	14.6556	14.1444
13/12/2009	4.7	5	1	1.3	6	6.4	5.1	5.5	4.22778	4.98889	4.9	5.3	5.08889	6.68889	9.67222	10.1444	15.1222	14.8667
14/12/2009	3.9	5.3	-0.1	1.3	5.3	6.9	4.5	5.6	3.27778	5.54444	4	5.3	4.49444	7.91111	9.02222	9.88333	14.6667	15.2778
15/12/2009	3.5	6.2	0.5	1.6	4.7	7.5	4.3	6.7	3.44444	5.72778	3.8	5.7	5.11111	8.12222	9.50556	10.5111	14.9444	15.1444
16/12/2009	4.5	5.1	0.9	0.5	5.4	6.3	4.6	5.9	3.86667	4.72778	4.3	4.9	6.07222	6.66667	9.81667	10.0444	15.3667	15.1333
17/12/2009	4.2	4.1	1.3	-0.9	5.3	5.4	4.7	5	3.86111	4.10556	4.4	4.1	5.78889	7.49444	9.96111	9.94444	15.6222	14.3889
18/12/2009	3.6	5.7	1	2	4.8	6.7	4.5	6.1	3.42778	5.16667	3.9	6	4.58333	6.83333	10.0556	9.95	15.9	15.5222
19/12/2009	2.7	6.3	-0.7	1.4	3.9	7.1	3.4	6.5	2.42778	6.68333	3.1	6.3	3.5	9.32778	8.51667	11.3611	13.9444	16.5667
20/12/2009	2	3.5	-2	-1.5	3.4	5.2	2.9	5	1.91667	3.71111	2.3	3.5	3.57222	6.26111	7.53889	9.15	12.6778	13.8444
21/12/2009	1.5	2.7	-1.6	-1.9	3	5.2	2.5	4.5	1.95556	3.42778	2.3	2.9	3.12222	5.91111	7.06111	8.44444	12.2333	13.0889
22/12/2009	2.2	1.8	-1	-3.5	3.1	3.6	3	3.4	2.06667	1.83333	2.4	1.8	3.61667	3.78889	7.51111	6.68889	12.6556	11.1
23/12/2009	2.7	1.5	-0.5	-3.9	4.2	3.3	3.4	3.4	2.55556	1.77778	3.1	1	3.64444	3.52778	7.87778	6.45556	13.3778	11.0444
24/12/2009	1.9	1.7	-1.6	-2.5	2.7	3.5	3	3	1.67222	1.80556	2.1	1.7	3.74444	3.07778	8.11111	6.55556	13.2556	11.6889
25/12/2009	1.8	2.3	-1.2	-1.7	2.6	4	2.7	3.4	1.5	2.25	2.2	2.6	3.07222	3.56667	7.12222	6.86111	12.1667	12.4889
26/12/2009	2.7	3	-0.7	-1.1	3.3	4.4	3.3	3.8	1.76111	3.41667	2.5	3.1	2.93889	4.76111	7.12778	7.89444	12.5556	13.7
27/12/2009	3.2	3.3	-0.1	-0.2	4.3	4.2	3.6	4	2.37222	3.23889	3.3	3.4	3.18333	3.91111	7.58889	8.53889	12.8556	14.3778
28/12/2009	4	5.2	0.5	1.1	5.2	6.3	4.2	5.4	4.12222	4.74444	4.5	5.1	4.52778	5.41111	9.16111	9.18333	14.4889	14.8778
29/12/2009	3.6	4	0.2	0.2	4.8	5	3.9	4.6	3.50556	3.97778	3.5	4.2	3.87222	6.26667	9.16111	9.28889	14.5222	14.4667
30/12/2009	4.1	4.2	1.3	0.8	5.4	5.1	4.5	4.4	4.24444	3.93889	4.7	4.5	5.41667	5.35	10.7	#N/A	16.7556	14.3333
1/1/2010	3.6	2.7	0.6	0.3	4.6	3.7	3.9	3.9	3.11111	2.44444	3.6	2.9	4.35	3.73889	9.32222	8.46667	15.5778	13.9
2/1/2010	2.4	2.6	-0.6	-0.3	3.7	3.4	2.9	3.3	2.18889	2.22778	2.3	2.7	3.88333	3.57222	8.28889	7.81667	14.1667	13.1556
3/1/2010	1.6	2	-2.1	-1	2.9	2.6	2.4	2.9	1.27222	1.15	1.6	2.2	2.78333	3.01667	7.18333	6.43889	12.6	11.7111
4/1/2010	2.5	2	-2	-0.8	3.7	3.1	3	2.6	2.07222	1.41667	2.5	2.1	3.67222	2.66111	8.21111	6.78889	14.0333	12.6
5/1/2010	1.9	1.2	-2.4	-2	3.4	1.9	2.8	2.1	1.51111	1.34444	2.2	1.4	2.71667	3.22222	7.57222	7.44444	12.9667	12.7111
6/1/2010	2.7	2	-1.6	-0.4	3.5	2.4	2.9	2.6	1.92222	1.92222	2.1	2.3	3.48889	3.41667	8.02778	7.79444	13.4778	13.1556
7/1/2010	3.6	3.1	-1	0.5	4.7	3.3	4.1	3.2	3.01111	2.82778	3.2	3.2	4.38889	4.11667	8.86111	8.3	14.5778	14.2889
8/1/2010	2.3	2.6	-1.4	0.2	3.7	2.6	3	2.6	1.97222	1.92778	2.2	2.7	3.26667	4.14444	8.21667	7.81667	13.7778	13.5556
9/1/2010	3.4	2	-0.4	0	4.6	2.3	4	2.5	3.08333	0.877778	3.7	1.8	4.61667	2.38333	8.52222	6.36111	13.9444	12.0889
10/1/2010	3.4	2.8	-0.2	0.4	4.5	3.1	3.7	3.1	3.68889	1.92778	3.6	3	5.77222	3.20556	8.86667	7.95556	14.1222	14.1667
11/1/2010	1.9	2.2	-2.3	-0.8	3.7	2.9	2.7	2.7	2.31111	1.82778	1.9	2.4	4.44444	3.01111	8.03333	8.01111	12.8222	14.2556
12/1/2010	1.6	0.7	-1.8	-1.8	3.3	1.7	2.5	1.8	1.27778	0.888889	1.8	1.1	3.08333	3.09444	7.10556	6.71667	12.1444	12.6556
13/1/2010	3.6	0.3	0.2	-2.3	5	1.6	3.7	1.1	3.43333	0.433333	4.4	0.7	4.61111	2.27778	8.76111	6.31111	14.1667	12.3556
14/1/2010	4.2	0.6	0	-1.7	5.6	1.5	4.3	1	4.64444	0.588889	4.2	1.1	6.55556	1.54444	9.56111	6.17778	14.9333	12.3667
15/1/2010	2.4	2.1	-1.5	-0.1	4.1	2.7	3	2.2	3.01667	1.93333	2.8	2.6	5.18333	3.42778	8.59444	7.68889	13.8889	13.7111
16/1/2010	3.6	3	-0.7	0.5	5.1	3.6	3.7	2.9	4.06667	2.71667	3.9	3.5	6.11111	4.05	8.56111	8.10556	13.8111	14.2667
17/1/2010	3.2	3.3	-0.9	0.8	4.8	3.6	3.3	3.3	4.01667	2.8	3.8	3.6	6.32222	3.91111	8.98889	8.50556	14.2889	14.8778
18/1/2010	3.5	2.6	-0.2	0.1	4.7	3.5	3.6	3	3.83333	2.15556	4	3.2	5.57222	3.55556	9.53333	8.12222	15.2667	14.2333
19/1/2010	4	2.8	-0.2	0	5.2	3.5	4.1	2.9	3.97222	2.36111	4.4	3.3	5.95	4.24444	9.96111	7.95556	15.3222	13.6889
20/1/2010	2.5	3.6	-1.6	0.1	3.7	4.8	3.2	4.1	2.31667	2.82222	2.7	3.7	5.00556	5.01667	8.45	8.15556	13.9222	13.5778
21/1/2010	1.9	4	-1.5	0.7	2.9	5	2.7	4.1	0.988889	3.57222	2.1	4.3	3.73333	5.63889	7.02222	9.12222	12.5444	14.6111
22/1/2010	1.1	4.7	-1.9	1.2	2.3	5.8	2.3	5	0.577778	4.50556	1.6	5.1	2.96111	6.01667	6.32778	10.0278	12.4111	16.2444
23/1/2010	1.1	4.8	-2.5	1	2.5	6.3	1.8	4.7	1.03333	4.77222	1.5	5	3.39444	6.76111	7.36111	10.1	13.2889	15.8333
24/1/2010	1.6	4.5	-1.2	0.1	2.7	5.7	1.7	4.8	1.2	3.73333	1.8	4.2	2.78889	5.66111	7.78333	9.5	13.8444	14.6667
25/1/2010	1.7	4.5	-0.9	0.6	2.6	6.1	1.7	4.9	1.6	3.76111	2.3	5	3.06667	5.63889	7.72222	9.54444	13.9222	14.8444
26/1/2010	1.1	4.9	-1.5	0.9	1.8	6	1.7	5.1	1.07222	4.57778	1.5	5.1	3.22222	6.32222	7.68333	9.93333	13.8222	15.7333
27/1/2010	1.8	3.5	-1.3	-0.8	2.7	4.5	2.1	4.3	1.1	3.09444	1.9	3.5	3.21111	5.12778	7.06111	8.94444	13.0111	14.5111
28/1/2010	2.3	1.9	-1	-2.6	3.8	3.6	3	2.9	1.95	1.53889	2.5	1.8	3.75556	3.76667	7.63889	7.59444	13.5444	13.1889
29/1/2010	2.6	2.2	-1.5	-2	3.8	3.9	2.8	2.5	2.56111	0.983333	2.7	2.2	4.11111	2.87222	7.82222	7.05556	13.5	12.8889
30/1/2010	1.5	3.6	-2	-0.4	2.9	5.3	2.2	4.1	1.84444	3.18333	1.9	3.8	4.31667	4.17778	7.57778	#N/A	13.2222	15.0556
1/2/2010	2.9	1.7	-2	-1.9	4.6	3.7	3	2.7	2.87778	1.2	2.6	2.1	4.24444	3.3	7.62222	7.51667	13.1444	13.3222
2/2/2010	2.3	3.1	-2.9	-0.4	3.9	4.6	2.6	3.5	1.95	3.00556	2.3	3.5	4.81667	4.57222	7.81111	8.88333	13.2556	14.9
3/2/2010	3.4	4.4	-1.8	0.5	4.9	5.8	3.7	4.3	3.05	4.00556	3.5	4.8	5.54444	5.96111	8.85556	10.2778	14.3111	16.3444
4/2/2010	3.4	4.5	-1.5	0.3	5.2	6.1	3.4	4.7	3.82778	4.45	3.7	4.6	4.71667	6.10556	8.94444	10.2944	14.8111	16.0667
5/2/2010	4.9	4.3	0.3	0	6.5	5.9	4.2	4.5	4.97778	3.83333	5.6	4.6	6.45	5.08333	10.7167	9.94444	16.6889	16.5444
6/2/2010	4.7	4.2	0.3	0.9	5.7	5.6	4.4	4.6	4.18889	3.99444	5.3	4.3	6.42222	5.83889	10.1278	10.0778	16.2333	16.2444
7/2/2010	5.1	4.6	2.2	2.3	6.3	6.2	5.4	5	4.36667	4.26667	5.7	5	6.63333	6.30556	10.3556	10.5056	16.4667	17.0222
8/2/2010	5.7	5.7	1.3	2.4	7.2	7.1	5.8	5.9	5.5	5.57222	5.7	5.9	7.64444	7.29444	10.8444	11.5778	17.0222	18.0333
9/2/2010	4.7	5.1	0.6	1.2	6.5	7	5.4	6	4.42222	4.64444	5.1	5.1	6.84444	6.45556	10.5278	10.8778	16.9444	16.9889
10/2/2010	4.4	5.7	0.7	1.1	6.3	7.6	5.2	6	3.83889	5.2	4.7	5.4	5.99444	7.22222	9.89444	10.2278	16.2556	16.1
11/2/2010	3.6	5.2	-0.3	0.6	6	7.4	4.6	5.7	3.78889	5.78889	3.8	5.1	6.73333	8.15	10.0722	10.4889	15.7222	15.9556
12/2/2010	2.9	5	-1.3	0.4	5.2	6.9	4.5	5.7	3.16111	5.3	3.1	5.1	5.45	8.68889	8.83889	11	14.4	16.4444
13/2/2010	3	3.8	-1	-0.6	5.2	6.3	4.2	5	2.75556	4.33333	3.4	4	4.80556	7.56667	7.61111	10.2167	12.8778	15.6889
14/2/2010	4.2	4.4	-0.7	0.4	6.1	7	4.9	5.1	3.93333	4.41667	4.7	4.2	6.22778	6.75	8.90556	10.1	14.2111	15.9444
15/2/2010	3.6	4	-0.2	-0.8	5.8	6.7	4.3	5.2	3.29444	4.38333	4.1	4	5.81667	6.53889	8.65556	9.78333	14.6	15.5
16/2/2010	4.6	3.7	0.6	-0.8	7.1	6.3	5.5	5.1	4.51667	3.92778	4.9	4.1	6.62778	6.01111	8.97222	9.15556	14.7222	14.9667
17/2/2010	4.4	4.6	-0.4	0.5	6.7	6.7	5.5	5.4	4.37222	4.2	4.6	4.6	7.27222	6.62778	8.92222	9.88889	14.4111	16.4778
18/2/2010	3.7	5.8	-0.7	1.4	6.1	8.2	4.7	6.7	3.50556	5.60556	3.8	6.1	5.42778	7.79444	8.31667	10.5667	13.9556	17.0889
19/2/2010	4.7	6.1	1	1.6	7.3	8.5	5.4	6.6	5.56667	6.60556	5	6.5	6.80556	8.7	10.0833	12.2667	15.9667	18.3111
20/2/2010	4.6	5.5	0.4	0.5	6.9	7.8	5.6	6.2	5.27778	6.41111	5	5.6	6.8	8.22778	10.3167	11.8889	16.7667	17.5667
21/2/2010	3.9	2.8	-0.2	-2.5	6.6	5.5	5	4.5	4.48333	4.10556	4.3	3.3	6.64444	7.01111	9.89444	10.3111	16.0333	16.1889
22/2/2010	5.5	2.7	1	-1.4	8.1	5.7	6.1	4.1	5.62222	3.33889	5.8	3.4	7.78333	5.37778	10.7889	9.28889	16.9444	15.4556
23/2/2010	6	4.2	0.9	0.5	7.7	6.9	6.1	4.9	5.72222	5.27778	5.8	4.4	8.07778	8.02778	11.5333	10.1889	18.0333	15.9222
24/2/2010	6	3.5	2.4	-1.2	8.2	6.2	6.4	4.9	5.46667	4.77778	6.4	4.1	6.98889	8.62222	10.8167	10.2167	17.5778	15.9
25/2/2010	7.1	3.5	3.6	-1.2	9.3	5.8	7.6	4.7	7.09444	4.32222	7.5	3.7	9.02222	7.08333	12.4889	9.77222	19.2444	15.0333
26/2/2010	7.5	3.5	3.7	-0.8	9.7	5.6	8.2	4.6	7.43889	3.45	7.7	3.5	8.93889	5.95	13.5556	9.5	20.4	15.4333
27/2/2010	6.5	4.7	2.6	0	9.2	7	7.8	6	6.61111	4.4	6.8	4.4	8.86667	6.06111	12.0167	#N/A	18.2778	15.3444
28/2/2010	5.9	4.7	1.4	0.2	8.5	6.5	7.3	5.5	6.18333	5.47778	6.3	5.1	8.66667	8.51667	11.3333	#N/A	17.1556	16.4333
1/3/2010	4.8	3	0.9	-1	7.5	5.6	5.8	4	5.15556	4.15556	5.4	3.6	8.23333	7.02778	10.7778	9.20556	16.9556	14.6778
2/3/2010	5.2	4.5	1.9	0.6	7.9	6.9	6.5	5.4	5.76111	5.34444	6	5.3	7.92778	7.54444	11.7167	9.75556	18.4	15.6333
3/3/2010	7	5.6	3.1	0.5	9.3	7.7	8.1	6.2	6.71111	6.2	7.2	5.8	9.32778	8.96111	12.5389	10.3833	19.3556	16
4/3/2010	5.4	3.1	0.8	-1.3	8.2	5.9	7.2	4.5	5.42222	3.7	5.3	3.9	8.78889	6.47222	11.3278	9.36667	17.1333	14.7444
5/3/2010	6.3	3	1.4	-0.9	8.8	5.7	7.6	3.9	6.39444	3.91111	6.2	4	8.9	6.22778	11.5833	9.88333	17.6778	15.5889
6/3/2010	7.5	4	2.9	-0.8	10	5.9	8.7	5	7.21111	3.83889	7.7	4.6	9.67778	6.91111	12.2444	9.97778	18.3222	16.2556
7/3/2010	8.7	4.1	4.6	0.1	11.4	6.2	9.8	5.2	8.66111	4.75	9	4.8	11.45	7.6	13.5	10.7444	20.5111	17.0667
8/3/2010	8.5	5.7	3.9	1.7	10.8	7.9	9.7	6.3	9.09444	5.93333	8.9	6.4	11.6556	8.6	14.2667	11.1889	20.6444	17.7333
9/3/2010	7.8	6.5	2.4	2.5	10.2	8.5	9	7.1	7.99444	6.51667	7.8	6.7	10.7056	9.15556	13.25	12.0167	19.7111	18.4222
10/3/2010	5.3	6.6	0.7	2.9	8.3	9.1	7.3	7.4	6.47778	7.10556	6	7.2	9.25556	9.05	12.1333	13.1611	18.3333	19.8111
11/3/2010	4.9	6.9	0.4	3.3	7.6	9.3	6.8	7.8	5.67222	7.59444	5.1	7.3	8.47778	9.79444	11.4722	13.4778	17.8889	20.7444
12/3/2010	6.2	7.1	2.1	3.3	8.8	9.4	7.5	7.6	6.35556	7.92778	6.2	7.5	9.35	10.1056	12.0556	13.5667	18.7222	20.6
13/3/2010	7	8.5	2.6	4.7	9.6	10.6	8.7	8.9	7.23333	8.67222	6.5	8.3	9.63333	11.1444	12.85	13.9778	19.4	21.0444
14/3/2010	9.1	8.1	4.6	3.9	11.6	10.4	10	9.2	9.63889	8.46111	9.7	8.2	11.5056	11.15	15.0778	14.9333	21.7444	21.6556
15/3/2010	8.3	8.3	3.6	3.8	10.7	10.6	9.4	9.5	8.96667	8.46667	8.7	8.4	11.4	11.0111	14.7111	14.1833	21.3111	20.6667
16/3/2010	7.6	7.5	2.9	3	10.2	9.8	8.9	9	7.62222	7.99444	7.5	7.9	10.3389	10.9222	13.7444	14.3167	20.5778	21.4333
17/3/2010	7.6	7.5	2.9	3.8	10.5	10	9.2	9	7.81111	7.67778	7.5	8	11.1944	10.5167	13.7778	13.7556	20.2333	20.6889
18/3/2010	7.5	7.6	3	4.6	10.6	10.3	9.2	9.1	8.25	7.66667	8.1	8.2	10.7111	10.1167	14.1333	13.1611	20.6778	20.0333
19/3/2010	8	9.1	2.9	5.4	10.9	12	9.4	10.9	8.47778	9.08889	8.1	9.3	11.2278	11.0333	13.9722	13.3611	20.4222	19.3444
20/3/2010	8.4	8.9	3.7	5.3	11	11.6	9.8	11	8.88889	8.73333	9	9	11.6889	11.4556	13.8667	13.4889	20.2	20.0889
21/3/2010	8.1	8.8	3.9	4.5	11	11.8	9.7	11	8.59444	9.67222	8.4	9.1	11.2889	11.8778	13.5778	13.7611	19.9556	20.8889
22/3/2010	9.2	8.9	4.8	4.2	11.7	11.9	10.1	11	8.89444	9.7	8.9	8.9	11.3278	12.6	13.8056	13.75	20.3222	20.1667
23/3/2010	9	7.6	4.7	2.6	11.9	10.4	10.5	9.8	9.11111	8.86667	9.2	7.8	11.1389	11.3833	14.2778	13.2889	20.6222	18.9222
24/3/2010	8.3	7.2	3.4	1.8	11.4	10.2	10	9.6	8.51111	7.99444	8.4	7.2	11.0722	10.9444	13.9	12.8722	20.5667	18.5556
25/3/2010	8.4	7.4	3.4	2.3	11.1	10.5	10.2	9.4	9.05556	7.71667	8.5	7.3	11.2833	10.3611	14.3611	12.3556	21.0778	18.3
26/3/2010	8	9.1	3	4.2	10.4	12.5	9.7	10.9	8.29444	9.63889	7.8	9.4	10.5278	12.2722	13.8556	13.8222	20.4444	20.3333
27/3/2010	6.8	9	2.3	3.9	9.8	12	9.2	10.7	7.28333	9.21111	7.1	9.3	10.3444	11.9778	13.3667	13.8944	19.8222	20.4444
28/3/2010	6.5	8.4	1.2	3.6	9.5	11.2	8.5	10.5	6.27222	9.07778	6.4	8.7	9.16667	12.0333	12.0333	13.8944	18.6333	20.6667
29/3/2010	5.3	8.3	0.2	3.6	8.3	11.2	7.7	10.5	5.72222	8.78889	5.8	8.4	8.24444	11.3278	11.0778	13.3222	17.4222	19.9556
30/3/2010	6	8.3	1.1	3.4	8.9	11.4	7.9	10.6	5.78889	8.25	6.3	8.7	8.64444	10.9389	11.3222	#N/A	17.5333	19.8
1/4/2010	7.8	8.5	3.8	3.6	10.8	11.1	9.6	10.7	8.02778	8.83889	8.1	8.4	10.6333	12.2056	13.1556	13.9389	19.9111	20.3111
2/4/2010	8.4	9.2	3.8	4.1	11.1	11.9	10.3	11.1	8.58333	8.95556	8.4	9.3	11.2389	12.0667	13.7667	13.7167	20.6	20.5222
3/4/2010	7.7	9.1	2.7	3.7	10.3	11.9	9.7	11	8.07778	9.26667	7.5	9	10.6722	11.9722	13.1667	14.0889	19.6889	20.9889
4/4/2010	5.9	7.7	1.2	2.2	9	10.6	7.9	10.1	6.78333	8.52222	6.5	7.6	9.77222	11.4611	12.2111	13.0444	18.4333	19.1333
5/4/2010	6.3	7.6	0.8	2.5	8.9	10.6	7.6	9.8	6.56667	8.19444	6.5	7.7	9.48889	10.9722	12.1222	12.9056	18.4556	19.1556
6/4/2010	7.1	7.5	2.1	2.7	9.8	10.5	8.4	9.6	7.40556	8.18889	7.3	7.9	9.43889	11.5167	12.9167	13.0278	20.0222	19.5
7/4/2010	7.6	7.2	2.3	2.5	9.9	9.7	9	9.2	8.12222	7.63889	7.8	7.3	10.85	10.8833	13.5667	13.2556	19.9111	19.4667
8/4/2010	6.9	7.4	1.8	2.6	9.6	9.7	8.7	9.2	7.05	7.77778	7.3	7.7	9.72778	11.1722	12.2444	13.4722	18.6778	19.9
9/4/2010	7.7	7.5	2.9	2.9	10.8	10.2	9.3	9.8	7.77222	7.95556	8	7.8	9.60556	10.8444	12.7444	13.1444	19.6222	19.4333
10/4/2010	8.2	7.4	2.9	3	10.9	10.3	9.4	9.3	8.61667	8.08333	8.5	7.9	10.9778	10.6222	13.8667	13.2833	20.5667	19.8333
11/4/2010	6.6	8.2	1.1	4.3	9.4	11.1	8.1	10.2	7.93333	8.55556	6.8	8.8	10.5278	11.2444	12.9944	13.8111	19.5222	20.3111
12/4/2010	6.1	9.2	0.4	5.2	9.3	12.1	7.6	11.4	6.84444	8.57222	6.2	9.3	9.37778	11.0667	12.5222	13.15	18.9	19.7889
13/4/2010	6	9.3	0.7	5.3	9	12.3	7.4	11.4	6.35556	8.97778	6.5	9.5	8.76111	11.4111	11.7833	12.7944	17.9889	19.6556
14/4/2010	7.1	9.8	2	5.4	10	13	7.9	11.5	7.53889	9.66667	7.3	10.4	10.0444	11.9556	12.4667	13.8833	18.8333	20.4111
15/4/2010	7.7	10	3	5.9	10.3	13	8.9	12.2	8.06667	10.1222	7.5	10.7	10.5833	12.3778	12.9889	14.8722	19.4222	21.6889
16/4/2010	8.7	10.8	3.9	6.7	11.1	13.7	9.9	12.6	8.57778	10.2389	9.1	11.2	11.2222	12.8167	13.4944	15.2444	20.0667	21.9222
17/4/2010	8.6	10.7	4.2	6.5	11.7	13.6	9.8	12.8	9.16111	11.0944	8.8	11.3	11.1056	13.7389	13.95	16.6444	20.9222	23.7778
18/4/2010	9.2	11.1	4.7	7	11.8	14.2	10.3	12.6	9.34444	10.5889	9.3	11.5	11.8167	13.6333	14.0111	15.7222	20.9222	22.8778
19/4/2010	9.4	12.1	4.7	7.9	11.5	15.1	10.1	14	9.51667	11.55	9.3	12.3	11.9611	14.4667	14.0444	15.7222	20.8444	22.2889
20/4/2010	9.9	12.1	4.9	7.6	12.3	15.5	10.8	14.3	9.85	12.3333	9.4	12.3	12.1611	14.2833	14.35	15.8	21.1333	22.8333
21/4/2010	8.8	11.5	3.8	6.4	11.6	14.5	10.2	13.8	9.26667	12.3333	8.3	11.5	12.0167	15.4667	14.0333	16.6944	20.5556	23.2667
22/4/2010	8.6	9.7	3.8	4.1	11.4	12.8	9.6	11.9	9.07222	10.3389	8.4	9.8	11.7889	14.0111	13.3889	15.75	19.4889	22.2889
23/4/2010	8.5	9.1	3.4	3.8	11.3	12	9.6	10.8	8.75	9.76111	8	9.1	10.8833	12.7722	12.5278	14.2056	18.2556	20.1444
24/4/2010	7.7	8.8	2.6	3.8	10.6	12	8.8	10.8	8.18333	9.78333	7.5	9	10.65	12.5389	12.4556	14.2111	18.0556	20.3889
25/4/2010	9.7	9.4	4.7	4.2	12.6	12.3	10.6	11.4	9.71111	10.75	9.8	10.1	11.4889	13.7222	13.7667	15.3778	20.5556	22.0889
26/4/2010	9.3	7.9	4.2	2	12.1	10.6	10.2	9.9	10.2056	8.91111	9.6	7.6	11.8722	12.7	14.2667	14.4222	20.5	20.1556
27/4/2010	8.2	7.6	2.9	2.1	11.4	10.8	9.4	9.8	8.67222	7.88889	8.5	8	11.15	11.4278	13.3278	13.9333	19.6667	19.5111
28/4/2010	8.4	8.1	3.1	3.4	11.1	11.2	9.1	9.7	9.40556	8.94444	8.3	8.2	11.4556	11.9556	14.3444	13.8778	20.7222	20.3222
29/4/2010	8.7	9.5	3.1	4.4	11.2	12.6	9.3	11.3	9.37778	10.3444	8.4	9.5	12.4444	13.3333	14.3056	#N/A	20.1	21.4
30/4/2010	8.9	9.4	4	4	11.5	12.2	9.7	10.5	9.55556	10.1056	8.7	9.4	12.4722	12.8944	14.6333	#N/A	20.5111	21.2111
1/5/2010	8.4	9.6	3.4	4.9	11.2	12.8	9.2	10.8	8.81667	10.1667	8.4	9.7	11.7278	13	13.95	15.0167	19.8333	21.1444
2/5/2010	9.2	11.3	4.4	6.9	12.3	14.3	10.2	12.1	9.15	11.4	9.1	11.6	11.5056	14.3778	14.2944	15.9167	20.8556	23.0778
3/5/2010	9.4	12.3	4.6	7.6	12.6	15.1	10	13.3	9.6	12.3333	9.4	12.3	12.4611	15.2278	14.8111	17.4833	21.5222	24.6889
4/5/2010	9.1	11.2	4.5	6.5	12	14.3	10.3	12.8	9.67222	11.9222	9.4	11.7	12.6833	15.2778	15.1278	16.6389	22.1778	23.6556
5/5/2010	9.9	11.9	5.1	6.9	12.8	14.6	10.9	12.8	10.2944	11.6389	9.9	11.6	13.0778	14.9111	15.5556	16.6444	21.7444	23.4778
6/5/2010	9.3	12.8	4.4	7.9	12.3	15.3	10.5	13.2	9.91667	12.2444	9.4	12.1	12.3722	15.0278	15.0833	17.2056	21.2556	24.9111
7/5/2010	9	12.6	3.7	7.8	11.6	15.5	9.8	13.4	9.62778	12.3944	8.6	12.3	12.2222	15.5222	13.9778	17.8444	19.6778	25.4889
8/5/2010	9.3	10.6	3.9	5.2	12	13.4	9.3	11.9	9.75556	11.2611	8.9	10.7	12.0444	14.2111	13.7444	16.9556	19.5889	23.6778
9/5/2010	10	8.4	5.2	2.5	12.8	11.2	10.2	9.9	10.55	9.50556	10	8.2	12.6278	12.7167	14.6444	14.5556	20.7778	20.6556
10/5/2010	10.3	9.3	5.5	3.1	12.8	11.6	10.5	9.5	10.4722	9.18333	10.4	8.4	13.2667	11.9111	15.5111	13.8667	21.8111	20.1222
11/5/2010	11	10.4	7	5.3	14.1	13.5	11.3	10.9	10.9389	10.4778	10.9	10.1	13.4778	13.7333	15.8056	15.5278	22.5889	22.4111
12/5/2010	11.5	11.3	7.1	6.4	14.3	14.1	11.9	11.8	11.9611	11.7944	11.9	11.2	14.4667	14.9944	16.7722	16.8944	23.8889	23.0667
13/5/2010	11.1	11.6	6.4	6.9	13.9	14.2	11.7	12.3	11.3889	11.7056	11	11.3	14.2722	14.65	16.6722	16.5222	23.4556	23.2667
14/5/2010	12.6	13.2	8.3	8.9	15.6	16	12.6	13.7	12.0333	13.1778	12.5	13.2	14.45	15.8278	16.4778	17.8167	23.4667	24.9889
15/5/2010	12.9	13.2	8.4	8.7	15.7	15.9	13.2	13.9	13.2167	13.6778	12.5	13	15.3889	16.5944	17.6167	18.4944	24.9444	25.5889
16/5/2010	11.6	12.9	6.8	8.4	14.2	15.6	12.2	13.7	12.1833	12.9444	11.2	12.7	15.1778	16.0111	16.6833	17.5111	23.1778	23.9333
17/5/2010	10.8	13.2	5.9	8.5	13.5	15.8	11.2	13.6	11.5278	12.9944	10.5	12.3	14.2556	15.8667	16.2333	17.2389	22.5	23.8889
18/5/2010	11.2	13.3	6.5	8.4	14.2	16.1	11.7	13.6	11.7444	13.2889	11.2	12.8	14.2833	16.0056	16.3889	17.6556	22.9111	24.7556
19/5/2010	12.6	13.7	7.7	9.1	15.6	16.4	12.7	14.2	12.1833	13.8778	12.2	13.1	14.6	16.6556	16.2333	18.3722	22.9556	24.9778
20/5/2010	12.3	13.5	7.8	8.7	15.6	16	12.6	14.2	12.4278	13.85	12.1	13.2	14.9444	16.9278	16.5556	18.6056	23.3444	25.6222
21/5/2010	12.9	12.4	8.3	7.8	16.4	15.6	13.3	13.6	12.6611	12.6944	12.3	11.9	15.2444	15.6111	16.3333	17.6611	22.9556	24.2889
22/5/2010	14.3	12.7	9.1	8	16.9	15.8	14.2	13.6	13.7167	13.25	13.3	12.2	16.1833	16.3444	16.8556	18.2944	23.9222	24.9889
23/5/2010	15.1	12.4	10.5	7.7	17.8	15.1	15.3	13.2	14.9	13.2333	14.4	12.1	17.3444	16.6722	17.7667	17.8167	25.0111	24.8222
24/5/2010	14.9	12.6	10.4	8	17.4	15.5	15.3	13.2	15.0833	13.0944	14.1	12.6	17.8111	16.3778	18.6444	17.0556	25.5667	23.9444
25/5/2010	14.6	12.9	10	7.9	17.5	15.9	14.8	13.8	14.8111	13.2167	14	12.6	17.6333	16.3444	18.3333	17.2833	25.2222	24.2444
26/5/2010	14.5	12.7	9.7	7.9	17.4	15.4	14.9	13.3	14.7333	13.0833	14	12.4	17.4111	16.1444	18.5444	17.0056	25.8667	23.6222
27/5/2010	14.5	12.2	10	7.3	17.7	15	15	13.1	14.7167	13.1333	14.2	11.9	17.0778	15.9556	18.5111	16.8944	25.3222	23.5556
28/5/2010	15.1	11.3	10.3	6.5	17.8	14.3	15.4	12	14.6	12.35	14.8	11.8	17.5444	15.2333	18.8556	16.4944	25.9222	22.8556
29/5/2010	15.1	12.2	10.4	7.3	18	15	15.4	12.6	14.4778	12.7944	14.1	11.9	17.2722	16.1278	18.3444	17.1389	25.0111	23.6667
30/5/2010	15.3	13.4	10.7	8.4	18	15.9	16.2	14	15.1	14.3778	14.8	13.1	17.8389	16.9889	18.5278	#N/A	25.4667	24.8778
1/6/2010	15.8	13.6	11.2	8.4	18.5	16	16.5	13.8	14.6	14	14.7	13	17.2944	16.7722	17.6278	18.0889	23.9889	24.8444
2/6/2010	16.2	15	12	10.2	19.2	17.4	16.8	14.8	16.05	15.6778	15.3	14.4	18.1778	18.2389	18.7889	19.55	25.8667	26.7556
3/6/2010	15.7	14.7	11.5	9.9	18.6	16.9	16.2	14.6	15.7056	15.5722	15	14.1	17.9778	18.5889	18.9667	19.8778	26.5	27.2333
4/6/2010	14.3	13.8	9.9	8.9	17.1	16.3	15.6	13.6	14.7056	14.2889	14.1	13.2	17.7333	17.7111	18.4389	19.0333	25.6889	26.0667
5/6/2010	14.8	14.4	10.7	9.9	17.8	17.2	15.7	14.3	14.7389	14.7111	14.4	13.7	17.9833	17.7056	18.6611	18.7667	25.7444	25.6222
6/6/2010	15.9	13.7	11.9	8.9	19	16.2	17	13.9	15.6389	13.9722	15.2	13.1	18.6111	17.25	19.4278	18.6167	26.3222	25.6889
7/6/2010	15.9	12.5	11.6	8.2	18.8	15.4	16.4	12.9	15.3833	13.1778	15.1	12.1	18.6667	16.4556	19.5444	17.5722	26.5111	23.8556
8/6/2010	15.6	13.6	11.6	9.4	18.7	16.3	16.8	13.8	15.4278	13.6111	15.3	12.9	18.55	17	19.5389	17.8944	26.3222	25.0333
9/6/2010	16	14.8	11.9	10.4	19.1	17.4	17.3	14.9	15.5	14.6889	15.1	13.8	18.5056	17.4167	19.4667	18.5222	26.5333	25.1444
10/6/2010	16.4	14.8	12.3	10.3	19.4	17.1	17.2	14.7	15.5389	14.7167	15.5	13.6	18.7889	17.8056	19.8722	18.9167	26.9889	25.6667
11/6/2010	16.7	15.3	12.7	11	19.7	17.9	17.6	15	16.0333	15.4833	15.9	14.4	19.4333	18.3611	20.4889	19.1222	27.3111	25.9667
12/6/2010	17	15.3	12.5	10.6	19.6	18.1	17.9	15.3	16.4278	15.1833	16.3	14.1	19.9556	17.9722	20.9667	18.9778	27.7778	25.4889
13/6/2010	16.1	15.7	11.5	11.5	18.8	18.7	17	15.6	16.2944	15.4833	15.6	14.7	19.6	18.5444	20.6222	19.6389	27.2444	26.7111
14/6/2010	15.2	16.5	10.4	12.6	17.8	19.5	16.3	16.5	15.1778	16.4944	14.7	15.5	18.1833	19.5222	19.1611	20.6056	25.6778	27.8222
15/6/2010	15.1	16.3	10.6	11.5	18	18.8	15.9	16.5	14.9444	16.0278	14.2	15	17.7111	19.3056	19.0833	20.2444	25.5778	27.1
16/6/2010	14.9	16.3	10.3	11.6	17.8	19.3	15.5	16.6	14.6889	16.0222	13.9	15.1	17.6056	19.1611	19.5222	19.9	26.3111	26.3778
17/6/2010	14.8	16.5	10.5	12.1	17.8	19.6	15.8	16.8	14.7056	16.6778	14	15.7	17.9278	19.4778	19.0889	20.5	25.8333	27.4
18/6/2010	15.6	16.6	11.8	12.2	18.8	19.8	16.5	17	15.55	16.7111	15.1	15.8	18.6611	19.75	19.4833	20.6833	26.2444	27.6
19/6/2010	16.4	16.2	13.1	11.4	19.5	19.2	17.2	16.3	16.9278	16.5444	16	15.1	20.0056	19.5167	20.4	20.3389	26.9333	27.5111
20/6/2010	17.7	17.1	13.8	12.4	20.6	19.8	18.1	17.4	17.7389	17.1556	16.7	15.8	20.1444	19.9444	20.9111	20.7722	27.4333	27.5333
21/6/2010	17.8	17.6	13.7	13	21	20.5	18.7	17.7	17.4111	17.5833	16.6	16.4	19.9111	20.4667	20.7278	21.4611	26.9556	28.0333
22/6/2010	18.1	18	14.2	13.5	21	21.4	18.5	18.2	17.9222	17.9833	16.9	17	20.2833	20.5056	20.75	21.2389	27.4111	27.9667
23/6/2010	18	18.1	14.2	13.9	20.8	21.2	18.1	18.3	18.1056	18.6389	17	17.2	20.8722	21.3056	21.7667	22.1111	28.7222	28.9111
24/6/2010	19.1	16.7	15.3	12.2	21.7	19.7	18.8	17	18.5556	17.6611	18	16.2	21.65	21.1056	22.5278	22.3167	29.8111	29.1
25/6/2010	20.7	15.5	16.8	10.5	23.2	17.9	20.4	15.6	19.6	16.0222	19.3	14.7	22.4222	19.5333	22.9556	21.0444	30.0889	27.3111
26/6/2010	20.2	16.1	16.3	11.1	23.1	18.4	20.5	15.7	20.0111	16.0722	19.2	15.2	22.4556	19.4	23.1889	20.85	30.1444	27.3111
27/6/2010	19.4	16.9	15.3	12.9	22.5	19.7	19.6	16.8	19.1	16.6889	18.5	15.8	21.5111	19.7333	22.3722	20.7722	29.3333	27.6889
28/6/2010	19	17.8	14.9	13.9	22.3	20.9	19.7	18	18.9056	17.2722	18	16.7	21.4833	20.2056	22.6167	20.8556	30.0667	27.9333
29/6/2010	17.6	19.2	13.1	15.7	20.7	22.2	18.3	19.2	17.9889	18.3556	17.1	17.9	21.0333	21.0278	22.4278	#N/A	29.8667	28.9444
30/6/2010	16.4	19.5	11.5	16.2	19.4	22.5	17.3	19.4	16.8111	19.0389	15.5	18.3	20.4056	21.8111	21.7833	#N/A	28.8333	29.7
1/7/2010	16	18.9	11.7	15.4	18.7	21.7	16.9	18.9	16.5333	18.8944	15.6	17.9	19.9889	21.9611	21.0333	23.2444	27.6	30.2556
2/7/2010	16.4	18.3	12.5	14.9	19.4	21	17.1	18.4	16.5778	18.5056	16.1	17.4	20.3889	21.5556	21.1	22.85	27.6778	29.7556
3/7/2010	17.3	19.3	13.9	15.8	20.5	21.7	17.9	19	17.5611	18.8778	16.8	17.9	21.1611	21.7944	21.8056	22.65	28.3444	29.4667
4/7/2010	17.8	20.4	14.3	16.9	20.9	23.1	18.1	20.1	18.1944	19.6889	17	18.8	21.3278	22.2833	22.2333	23.1389	28.9222	30.0333
5/7/2010	17.8	20.4	14.1	17	20.8	23.4	18.1	20.5	18.1444	19.8111	17.1	19.1	21.5722	22.5389	22.6111	23.4833	29.5667	30.6889
6/7/2010	18.4	20.6	15.3	17.4	21.4	23.5	18.9	20.9	18.8111	20.1944	17.8	19.3	22.1167	22.8333	22.6778	23.7389	30	30.4444
7/7/2010	18.9	22.1	15.5	18.8	21.6	24.7	19.1	22	19.1833	21.2111	18.3	20.5	22.4	23.45	22.9889	24.1222	29.9222	31.4333
8/7/2010	18.5	22.4	15.3	19.3	21	25.5	18.5	22.4	19.1056	21.7389	17.9	21	22.2611	23.7278	22.6667	24.5611	29.5	32.2444
9/7/2010	18.1	21.6	15	18.7	20.9	24.8	18.4	22.2	18.7	21.5667	17.8	20.6	22.3222	24.3111	22.3444	24.9222	28.9333	32.3667
10/7/2010	18.5	21.7	15.3	19.2	21.2	24.6	18.7	22.4	18.8	21.5722	18	20.9	22.1833	24.5444	22.8889	25	29.5444	32.3778
11/7/2010	19.3	21.7	15.8	18.8	21.9	24.5	19.5	22.6	19.1722	21.5167	18.6	20.9	22.3056	24.5889	22.7278	25.3667	29.4889	31.9444
12/7/2010	19	20.5	15.7	17	21.7	23.2	19.5	21.9	18.8222	20.5389	18.3	19.7	22.55	23.9	23.1167	24.5444	30.0111	31
13/7/2010	18.5	19.7	14.8	16.6	21.1	22.5	19.1	21.3	18.3889	19.6167	17.8	19.2	21.7389	23.1778	22.7222	23.2556	29.5222	29.7333
14/7/2010	18.6	21.4	15.3	18.4	21.3	24.3	19.3	22.5	18.6333	20.7889	17.9	20.1	21.3778	23.7333	22.1	23.7111	28.9333	30.4667
15/7/2010	19.7	23.3	16.4	20	22.5	25.9	20	23.8	19.5667	22.0111	18.9	21.7	22.4889	24.5111	22.5056	24.4389	29.4667	31.5778
16/7/2010	19.2	23.7	16.2	20.2	22	26.7	20.2	24.2	19.6333	22.6556	18.8	21.8	22.7389	25.1778	23.1833	25.0667	30.2667	32.3667
17/7/2010	19.1	23	16	19.4	22.2	25.8	19.9	23.7	19.3	22.3444	18.5	21.2	22.8889	25.2167	23.4278	25.4611	30.3111	32.8556
18/7/2010	19.6	22.4	16.5	19.1	22.7	25.1	20.7	23.5	19.6167	21.7889	18.9	21.4	22.9889	25.0167	23.1444	25.2833	29.7222	31.8778
19/7/2010	19.6	21.4	16.3	18.1	22.3	24.1	20.4	22.9	19.9556	21.5889	18.7	20.8	23.05	25	23.5611	25.5889	30.4333	32.2778
20/7/2010	19.7	21.8	16.4	18.2	22.4	24.4	20.6	23.5	19.6944	21.1722	18.7	20.8	22.4889	24.8444	23.2611	25.3389	30.0444	31.7556
21/7/2010	19.6	22.8	16.9	19.4	22.7	25.8	20.9	24	19.7944	21.8944	19.2	21.8	22.7667	25.0611	23.5444	25.35	30.4778	32.3
22/7/2010	20	22.3	17.3	18.8	23.1	25	21	23.5	19.7222	22.1778	19.6	21.3	22.9833	25.4333	23.3889	25.6111	30.4222	32.2333
23/7/2010	21.1	21	18.4	17.7	24.1	23.7	21.5	22.2	20.3889	21.6722	20.2	20.5	23.0722	24.9889	23.5222	25.0111	30.6222	31.7889
24/7/2010	22.1	20.6	19.3	17.2	25	23.3	22.2	22.2	21.35	21.2111	20.7	20.3	23.5222	24.8778	23.8778	25.05	31.0222	31.6778
25/7/2010	21.8	20.9	18.9	17.6	24.6	23.9	22	22.4	21.6611	21.2556	20.6	20.3	24.2722	24.8389	24.7722	24.8389	32.3778	31.4444
26/7/2010	20.1	21.2	17.2	17.9	23.2	23.9	21	22.4	20.7278	21.7944	19.5	20.5	23.7722	25.1556	24.2722	25.15	31.8444	31.8667
27/7/2010	19.9	20.2	16.7	17.3	22.7	22.9	20.5	22	20.1889	21.0056	19.3	19.8	23.3833	24.8389	24.0111	25.15	30.8778	31.6778
28/7/2010	19.1	20.7	16	18	22.1	23.4	20.1	22.4	19.6833	21.4389	18.8	20.4	22.8556	24.8611	23.7111	25.25	30.7778	31.9889
29/7/2010	19.1	20.8	15.9	18	21.8	23.4	20.1	22.2	19.7722	21.4444	18.3	20.5	23.1278	25.0111	23.2389	25.2056	30.3222	32.2222
30/7/2010	19.2	20.3	15.9	17.5	22	22.9	20.2	21.8	19.6611	20.9944	18.7	19.8	22.6167	24.8556	22.8444	#N/A	29.7778	31.5444
1/8/2010	20.4	20.6	17.8	18.1	23.2	23.4	20.9	21.7	20.8056	20.5278	19.7	19.9	23.65	24.2278	23.6667	24.6389	30.8111	31.1222
2/8/2010	20.6	21	17.7	18.5	23.2	23.6	20.9	22.3	21.1333	21.1056	19.8	20.5	24.0778	24.45	24.2889	24.7611	31.2444	31.4444
3/8/2010	20.2	21.6	17.4	18.9	22.7	24.4	20.8	22.5	20.7444	21.3778	19.6	20.7	23.9111	24.6667	24.2444	24.7556	31.4222	31.3444
4/8/2010	19.9	21.5	17.2	19	22.2	24.3	20.6	22.6	20.4	21.5722	19.3	20.7	23.7611	25.0444	24.2944	25.2556	31.1	32.0778
5/8/2010	19.6	21.5	17.2	18.5	22.4	24.4	20.6	22.2	20.1944	21.4444	19	20.6	23.5	24.7611	23.7333	25.5611	30.9444	32.4444
6/8/2010	19.4	21.5	17.1	18.4	22.1	24.1	20.3	22.2	20	21.5167	19	20.2	23.5167	24.7611	24.2667	25.1444	31.5667	32.3222
7/8/2010	19.6	21	17.5	17.9	22.4	23.8	20.4	22	19.9833	21.2833	19.2	20.2	23.1111	24.7222	23.5056	25.3722	30.6	32.7889
8/8/2010	21.2	20.9	19.1	17.8	24.2	23.8	21.6	21.9	20.6667	21.1944	20.2	20	23.4111	24.7611	23.3278	25.1222	30.1556	32.1778
9/8/2010	22.2	21.2	19.4	18.6	25	24.3	22.4	22.1	21.2722	21.7722	20.5	20.3	23.8056	24.9722	23.7167	24.9222	30.7667	32.0222
10/8/2010	21.1	21.5	18.3	18.7	23.5	24.6	21.8	22.2	20.8333	21.9167	19.9	20.6	23.7333	25.0556	23.7389	24.9	30.8222	32.0444
11/8/2010	20.6	21.6	17.9	19	23.3	24.7	21.5	22.4	20.5167	21.9944	19.4	20.7	23.6389	25.1222	23.6778	25.0833	30.8333	32.3
12/8/2010	19.6	21.2	16.7	18.9	22.5	24.5	20.7	22.3	20.2611	21.6167	18.9	20.2	23.3	24.6889	23.5056	24.5167	30.9444	31.7889
13/8/2010	19.1	20.9	16.5	18.2	22.1	23.9	20.6	22.1	19.8833	20.9	18.8	20	22.7333	24.5556	22.7111	24.25	29.6333	31.8556
14/8/2010	19.3	21.1	16.5	17.8	22.2	24	20.8	22	19.5833	21.3222	18.7	19.8	22.3056	24.4444	22.85	24.4556	29.9333	31.6
15/8/2010	18.5	20.9	15.8	18	21.6	23.8	20	22.1	18.8222	21.2889	18.1	19.9	21.9833	24.8556	22.7056	24.8722	29.6333	31.9111
16/8/2010	17.9	21	15.4	18.2	21.2	23.8	19.5	22.3	18.3111	21.3833	17.4	20.1	21.7611	24.9389	22.7278	25.0833	30.0667	32.0667
17/8/2010	18.5	21.2	16.3	18.2	21.8	24.3	19.7	22.1	18.7722	21.3278	18.1	20.2	21.5889	24.5222	22.5	24.55	29.6889	31.2444
18/8/2010	19.8	22.2	17.4	19.3	22.7	25.3	20.5	22.5	19.5389	21.9444	18.8	20.7	22.2111	24.8	22.7222	24.6278	29.8111	31.3778
19/8/2010	20.1	22.5	17.4	19.5	22.9	25.9	21.1	22.8	19.6944	22.3667	19.2	21.1	22.7167	25.4444	22.8722	25.3722	29.7444	32.7
20/8/2010	20.5	22.2	17.8	19.2	23.5	25.7	21.3	22.8	19.7389	21.8889	19.2	20.7	22.4222	25.5389	22.7111	25.6056	29.9889	33.0444
21/8/2010	20.6	22.2	18.1	19.4	23.8	25.8	21.1	22.7	19.5278	21.9333	19.2	21	22.5556	24.7722	22.6889	25.5056	29.9	32.9222
22/8/2010	20.3	21.7	17.7	19	23.4	25.1	20.9	22.9	20.15	21.1389	19.5	20.6	22.8833	24.5222	23.0667	24.9333	30.4444	32.4333
23/8/2010	19.8	21.4	17.6	18.7	22.9	24.8	21	22.5	19.9611	21.1556	19.4	20.1	23.0444	24.6611	23.5333	24.5389	30.7667	32.1333
24/8/2010	20.2	20.8	18.4	18	23.3	23.9	21.1	21.7	19.85	20.9167	19	20	22.6944	24.4667	22.9278	24.9444	30.5333	32.1
25/8/2010	20.7	20.7	18.3	17.8	23.5	23.8	21.2	21.8	20.1056	20.6611	19.6	19.6	22.9056	24.3222	22.9556	24.3389	30.0778	31.2556
26/8/2010	21.3	20.5	18.5	17.4	23.8	23.4	21.4	21.8	20.6889	20.3056	19.9	19.2	23.4	24.2444	23.3556	24.4778	30.8222	31.4111
27/8/2010	22.1	19.4	19.2	16.4	24.8	22.5	21.8	21.1	21.1833	19.2111	20.4	18.5	23.85	23.0833	23.7556	23.5778	31.0111	30.4889
28/8/2010	21.4	19.8	18.5	16.9	24.1	22.9	21.7	21.5	20.75	19.4611	20.1	18.7	23.5222	22.7056	23.7833	22.9056	31.0111	29.2222
29/8/2010	21.8	21.1	19	18.3	24.9	24.3	22.1	22.1	20.9944	20.2167	20.4	19.5	23.7056	23.3222	23.5167	23.4056	31.1778	29.4778
30/8/2010	22.5	21.2	19.7	18.8	25.5	24.3	22.6	22.2	21.5944	21.0389	20.8	20.1	24.7611	24.1111	24.6611	#N/A	32.1889	31.3
1/9/2010	21	19.6	17.6	16.6	23.7	22.4	21.8	20.7	20.8333	19.4389	20	18.4	24.3833	22.9556	24.6778	23.25	32.0333	29.7778
2/9/2010	19.3	19	16.3	15.9	22.2	22.1	20.5	20.7	19.9444	19.1722	18.6	18.3	23.6889	22.8278	23.8889	23.0333	31.0333	29.1333
3/9/2010	17.9	19.4	15.2	16.8	21.2	22.4	20	20.7	19	19.5833	17.8	18.7	22.9611	23.1667	23.35	23.2389	30.2	29.8333
4/9/2010	18	21	15	18	21.1	24.1	19.7	21.6	18.3556	20.1556	17.3	19.3	22.4833	23.2556	22.2333	23.4167	28.9333	30.2444
5/9/2010	17.6	21.7	14.3	18.8	21.3	24.8	19.3	21.8	18.0833	20.4556	17	19.9	22.2333	23.6778	21.9111	23.3056	28.4667	30.4889
6/9/2010	17.5	20.9	14.3	17.2	20.6	23.6	19	21.1	17.8556	20.4444	17	19.5	21.9833	24.2611	21.8333	23.7778	28.4889	30.8889
7/9/2010	18.7	19	15.4	15.3	21.7	21.8	19.8	19.9	18.4	19.95	17.7	18.3	22.2889	24.0944	22.2056	23.6556	28.9	30.9111
8/9/2010	19.5	16.9	16.1	12.9	22.3	20	20	18.6	18.7444	18.5889	18.3	16.8	22.3	23.1556	22.6111	23.1667	29.2556	29.9778
9/9/2010	18.7	15.5	15.6	11.1	21.9	18.3	20	17.8	18.5833	17.1167	17.6	15.3	22.0389	21.3389	22.5611	21.7111	29.2111	27.6667
10/9/2010	18.1	15.9	14.7	11.9	21.1	18.8	19	17.1	17.95	17.0056	17.1	15.5	21.2611	20.6	22.1833	21.2389	29.0778	27.7333
11/9/2010	17.2	16	13.3	12.3	20.3	18.9	18.5	16.8	17.2333	17.3444	16.5	16.1	20.7722	21	21.4	21.8444	27.6333	28.9444
12/9/2010	16.9	15.3	13	11.4	20.2	18.4	18.2	16.3	16.7833	16.2333	15.9	15	20.3	20.1222	20.8667	21.3278	27.2222	28.1
13/9/2010	17.2	15.8	13.4	12.2	20.3	18.7	18.2	16.2	16.6278	16.4222	15.7	15.3	20.15	20.1389	20.3	21.1278	26.1667	27.9333
14/9/2010	17.3	16.5	13.3	13.1	20.2	19.4	18.2	16.8	16.7444	16.5222	15.9	15.8	20.2167	20.7444	20.4389	21.5278	26.4222	27.9556
15/9/2010	17.3	17.5	12.8	13.7	20	20.1	17.8	17.5	17.2722	17.1278	16.1	16.4	20.9944	21.2222	21.3333	21.55	27.7111	28.2444
16/9/2010	15.9	17.3	11.4	13.5	18.9	19.9	17.1	17.4	15.7444	16.9611	14.9	15.7	19.4	20.8389	20.6333	21.4444	27.4556	28.5111
17/9/2010	16.7	16.1	12.7	12.3	19.6	19	17	16.8	15.5667	16.5556	15.2	15.2	18.9	20.2167	20.3556	21.1611	27.4333	28.0444
18/9/2010	16.7	15.3	12.8	12.2	19.6	18.1	17.3	15.8	16.2333	15.6222	15.5	14.9	19.8611	19.2778	20.9111	20.5778	28.5667	27.9222
19/9/2010	15.7	15.2	11.6	12.2	18.5	18	16.4	15.6	15.6333	15.0167	14.9	14.7	19.1944	18.4722	20.7833	19.8167	28.2111	26.4667
20/9/2010	15.7	16.4	11.4	13.3	18	19	16	16.3	15.2444	15.5111	14.2	14.8	18.9833	19.1056	20.2	20.0333	27.3889	26.5
21/9/2010	15.8	18.2	11.1	14.6	18	20.8	15.7	18.2	15.2056	16.4278	14.8	16	19.0222	19.7444	20.4222	20.2556	26.8556	27.4333
22/9/2010	15.4	19	10.4	15.5	18	21.7	15.6	19	14.8667	17.3722	13.7	17.3	18.2667	20.6389	19.7111	20.9111	26.5778	28.5333
23/9/2010	14.3	17.7	10.1	13	17.2	19.8	14.8	17.6	13.7333	16.9389	13	16.1	17.2778	20.5278	19.1778	21.0278	26.0222	27.8556
24/9/2010	15.2	16	11.5	11.9	17.6	18.5	15.1	16.4	14.1111	15.2667	13.9	14.9	17.9222	19.0778	19.35	20.1611	26.1111	26.8778
25/9/2010	16.3	16.1	12.2	11.5	18.7	18.7	16.1	16.5	14.7778	14.7833	14.6	14.6	18.2278	18.7333	19.2889	19.6556	25.7222	26.3778
26/9/2010	17	16.1	12.9	11.2	18.9	18.4	16.4	16.5	15.4889	14.8778	14.7	14.7	18.3722	18.5722	19.6667	19.2889	26.2889	25.7444
27/9/2010	16	16.4	11.6	11.5	18.1	19.4	16	16.9	15.2389	15.2278	14.1	15	18.4722	18.7167	19.6444	19.3444	26.3778	26.2111
28/9/2010	15.7	16.4	11.2	12.1	18	19.1	15.3	16.8	15.2	14.9889	14.4	14.8	18.55	18.6278	19.4278	19.4222	26.0889	26.2111
29/9/2010	16.1	15.4	12.1	10.8	18.6	18.1	15.9	16	15.8722	14.15	15.1	13.9	18.7611	17.3	19.45	#N/A	25.8111	25.1
30/9/2010	15.6	15.4	11.3	10.5	17.7	17.7	15.5	15.6	15.8444	14.15	14.7	14.1	19.2056	17.4444	19.8667	#N/A	26.4667	25.3444
1/10/2010	14.4	15.7	9.6	11.2	16.7	18.2	14.3	16	14.95	14.7889	13.9	14.4	18.4222	17.95	19.0611	19.4556	25.2444	26.4222
2/10/2010	13.7	14.1	8.9	9.7	16	16.6	13.6	14.6	14.6389	13.8167	13.4	13.4	18.1667	17.3	19.2111	18.6056	24.9556	25.5333
3/10/2010	14.4	13.1	9.9	8.8	16.7	16.2	14.1	14	14.8278	12.4222	13.5	12.1	18.3444	16.2389	19.0389	18.0611	24.4667	24.6889
4/10/2010	14.5	12.9	9.5	8.8	17	15.9	14.2	13.7	14.9056	12.2	13.7	12.4	18.0222	15.7222	19.3278	17.6278	25.3444	24.5556
5/10/2010	14.7	13.1	9.5	8.3	16.8	16.4	14.2	13.4	14.1056	12.6	13.5	12.3	17.4944	15.9056	18.4222	17.6889	24.2778	24.0444
6/10/2010	14.3	13.7	8.7	8.8	16.9	16.5	14.1	13.4	13.9278	12.9944	13.7	12.6	17.2167	16.3778	18.5222	18.5667	24.6444	25.0667
7/10/2010	14.4	14.1	8.9	9.5	16.9	16.7	14.2	14.2	13.5778	14.2889	13.2	13.5	17.1833	17.8333	18.6389	19.25	24.8111	26.2778
8/10/2010	14.5	12.8	9.9	8.8	17.1	15.9	14.2	13.3	13.0944	13.6833	13.2	12.5	16.3611	17.95	17.9	19.2444	23.9333	26.4222
9/10/2010	14.1	13.4	9.2	9.1	16.6	15.7	14.3	13.3	13.0444	12.8556	12.4	12.4	15.8	16.6667	17.0833	17.9889	23.1333	24.0444
10/10/2010	12.9	13.2	8	9.2	15.5	15.4	13.5	13.5	12.4389	12.7722	12	12.1	15.6056	16.4611	16.9722	17.6222	23.2333	23.9444
11/10/2010	13.2	11.9	8.8	7.6	15.9	14	13.4	12.2	12.6611	12.0278	12.2	11.2	16.0611	15.7167	17.25	17.0889	23.5667	23.2444
12/10/2010	14.6	12.2	11.1	7.3	17.3	14	14.3	12.2	13.4111	12.3111	13.7	12	16.5889	15.4278	18.5167	16.8278	25.2556	22.6222
13/10/2010	15.2	12.5	11.2	7.7	17.7	14.5	15.2	12.5	13.5944	12.4556	14.2	11.8	16.6556	15.7889	18.6889	17.2278	25.5222	22.6778
14/10/2010	14.5	13.2	10.1	8.8	17	15.6	14.6	12.8	13.3556	13.0889	13.2	12.5	16.6056	16.1222	18.2111	17.2889	24.7444	22.8778
15/10/2010	13.3	13	8.1	8.6	15.8	15.7	14	12.7	12.4444	13.0944	12.1	12	15.9667	16.3889	17.4389	17.3722	23.6111	23.0556
16/10/2010	12.1	12.2	7.6	7.1	14.7	14.6	13.2	12.2	11.8278	12.2167	10.9	11.4	15.4778	15.6889	16.8778	17.0944	22.9556	23.0667
17/10/2010	11.5	11.8	8.4	6.8	14.5	14.6	12.3	12.2	11.0833	12.1389	10.8	11.5	14.7111	15.7	16.2333	16.7444	22.5333	22.6111
18/10/2010	12.2	11.2	8.7	6.7	15	14.1	12.5	11.8	11.5722	11.5611	11.5	10.7	14.8111	14.8389	16.7278	16.3889	23.0222	22.2556
19/10/2010	12.4	11.3	8.2	7.8	14.9	14.1	12.4	11.5	12.1889	11.1111	11.6	10.9	15.4111	14.1667	17.3	15.5722	23.5556	20.9889
20/10/2010	11.8	12.3	6.7	8.5	14	14.7	12	12.1	11.2722	11.9833	10.7	11.4	14.7722	14.95	16.4222	16.25	22.3444	22.1333
21/10/2010	12.1	11.6	7.5	7.7	14.6	14.4	12	12	11.7889	10.9	10.9	10.5	15.0833	14.0333	16.4167	15.6389	22.6222	21.5222
22/10/2010	12.5	11.9	7.4	7.8	14.9	14.4	12.2	11.9	12.1111	11.05	11.3	10.9	14.8167	14.2111	16.9944	15.8611	22.7111	21.7333
23/10/2010	12.4	11.5	8.2	7.1	15	13.9	12.4	11.4	11.7278	11.4667	11.1	10.6	14.7722	14.3222	16.6778	16.2167	22.6444	22.3
24/10/2010	12.8	10.5	8.8	6.7	14.8	13	12.3	11	12.0722	10.2111	11.3	9.9	15.2556	13.0833	16.7722	15.6111	22.7222	21.8889
25/10/2010	12.8	11.2	7.9	7.1	15.1	13.3	12.6	11.5	11.7722	10.5278	11.3	10.5	15.2778	13.6611	16.6778	15.9889	22.8778	22.4333
26/10/2010	11.4	11.7	6.3	7.1	13.6	13.7	11.4	11.7	10.8167	10.9833	10.1	10.8	14.5944	13.8778	16.15	16.1167	22.2667	22.6667
27/10/2010	9.5	10.4	4.9	5.6	11.7	12.4	10	10.9	9.25556	10.3222	8.7	9.9	12.8167	13.9833	14.8944	15.6278	20.8	21.1111
28/10/2010	8.6	9.7	5	5.7	10.9	12.2	9.3	10.4	8.17778	9.51667	8.1	9.5	12.0833	12.9889	13.8389	14.5722	19.8556	20.1556
29/10/2010	9.7	9.9	5.7	5.6	11.9	12	10.1	10.2	9.01111	9.82222	8.9	9.2	12.1778	13.3056	14.0833	15.0889	19.9778	20.9222
30/10/2010	8.4	10.2	4.1	4.8	10.8	12.2	9.3	10.6	7.92222	9.87778	7.6	9.3	11.3222	13.3722	13.7056	#N/A	19.4222	20.1778
1/11/2010	7.8	8.4	4.5	4.5	9.6	10.4	8.4	9.1	6.96111	7.72778	7.4	7.8	9.31111	11.0556	13.5333	12.4889	19.8556	18.4333
2/11/2010	6.5	8.8	3.9	5.7	8.9	11.1	7.5	9.5	6.32778	8.16667	6.4	8.6	8.76111	11.2444	12.9278	13.2278	19.4111	19.1111
3/11/2010	6	9.1	3.1	6.1	8.2	10.9	6.9	9.5	5.93333	7.88889	6.1	8.4	8.70556	10.4722	12.1556	13.4389	17.9778	19.2667
4/11/2010	5	9.1	2.5	5.6	7.2	10.7	6.2	9.6	4.51111	8.38889	5.2	8.7	7.26667	10.8944	10.8889	13.8278	16.9111	19.4778
5/11/2010	5.8	8.5	3.5	5.6	7.8	10	6.4	9.1	5.22222	7.52222	5.7	7.7	7.48333	10.3889	11.3333	12.8556	17.9333	18.9
6/11/2010	7	8.4	3.8	5.4	8.6	9.8	7.1	8.9	6.41111	7.48333	7	7.3	8.23889	10.7278	12.25	12.9222	18.2667	19.2889
7/11/2010	7.3	8.3	2.8	4.4	8.9	9.9	7.2	8.8	6.90556	7.74444	7.3	7.5	9.46667	11.2	13.0722	13.3	18.8333	19.2889
8/11/2010	6	8	2.4	3.8	8	9.9	6.2	8.4	5.51111	7.3	6.2	7.4	7.95556	10.1833	11.7944	13.0056	17.6556	18.8444
9/11/2010	6.8	7.3	3.1	3.7	8.4	9.3	6.6	7.8	6.12222	7.06667	6.7	7.7	7.77222	10.0444	12	12.55	18.0444	18.5778
10/11/2010	7.5	7.3	3.7	4	8.6	9.1	7.2	8	6.70556	7.25	6.9	7.7	8.06111	9.46667	12.3222	12.1722	18.6222	18.3778
11/11/2010	6.9	7	2.9	3.2	8.3	8.2	7	7.6	6.23889	6.72778	6.9	6.9	8.10556	9.23333	12.7	12.1667	18.6556	18.0111
12/11/2010	6.3	6.2	3.8	2.4	7.7	8	6.9	7	5.93333	5.84444	6.6	6.2	7.32222	8.64444	12.1056	11.3111	18.2889	16.8889
13/11/2010	7.2	6.1	5.4	1.8	8.6	7.5	7.3	6.7	6.36111	6.06667	7.4	6.1	7.3	8.32222	12.2833	11.0111	19.0333	16.2444
14/11/2010	7.4	5.9	3.7	2.3	8.6	7.9	7.7	6.6	6.81111	6.08889	7.3	6.1	8.27778	8.22222	12.6167	11.0556	18.9	16.5889
15/11/2010	7	6.8	3.6	2.7	8.6	8.3	7.4	6.7	6.93333	6.60556	7.5	6.6	8.73889	8.26667	12.8222	12.1444	18.7333	17.6667
16/11/2010	6.7	7.4	3	3	8.4	8.4	7.1	7.1	6.51667	6.96111	7	7.2	7.84444	8.47778	12.6389	12.2556	18.4111	17.8667
17/11/2010	5.9	5.2	2.9	1.1	7.6	6.5	6	6.1	5.6	5.16667	6.1	5.2	7.06111	7.18333	11.5944	10.8	17.6333	16.2
18/11/2010	5.8	5.7	2.7	1.8	7.1	7.2	6.3	6.1	5.35	5.66667	5.3	5.8	7.13333	7.32222	10.9667	10.9444	16.7333	16.4111
19/11/2010	5.1	5.5	2.4	1.8	6.8	6.8	6.1	6.2	4.83333	5.99444	5	5.4	6.68889	8.43333	10.5556	12.2111	16.3889	17.2333
20/11/2010	6.3	4.6	2.5	1.6	8.1	6	6.2	5.2	6.15	4.08889	6	4.4	7.96667	5.93889	11.5556	10.3556	16.9111	15.4222
21/11/2010	5	5.4	2.3	1.8	6.3	6.7	5.3	5.9	4.57222	5.11111	5	5.6	6.52778	7.37778	10.4444	10.6778	16.0111	15.6
22/11/2010	5.3	5.7	3.9	2.3	6.7	6.9	5.5	6	5.03333	5.58333	5.5	5.6	6.53333	7.76111	10.9778	10.3444	16.9667	15.6889
23/11/2010	6.5	5.1	4.9	1.1	7.6	6.7	6.5	5.6	5.78889	4.95556	6.8	5.1	6.93333	7.06111	12.1222	9.78889	18.2444	14.9
24/11/2010	6.5	4.1	4.4	0.9	7.4	5.5	6.5	4.5	6.28889	4.36667	6.7	4.2	7.59444	6.61111	12.2056	9.36667	18.3333	14.5889
25/11/2010	4.3	4.7	2.2	1.5	5.3	6.3	5	5.1	3.93889	5.02778	4.3	4.7	5.72222	7.08889	9.78889	9.97778	15.3222	15.2333
26/11/2010	3.9	4.8	1.6	1.2	4.8	6.3	4.6	4.9	3.57778	4.19444	3.8	4.6	5.43889	5.68333	9.44444	9.33889	15.3889	14.5556
27/11/2010	4.2	5.4	2.3	2.6	5.3	6.5	4.7	5.5	3.78333	4.93889	4.1	5.6	5.04444	5.96111	9.57778	10.1722	15.8667	15.3889
28/11/2010	4.1	6.2	2	3.1	5.1	7.6	4.6	6.2	3.85556	5.28333	4.3	5.8	5.51111	6.40556	9.59444	10.3722	15.4333	15.6778
29/11/2010	4.1	4.8	2.1	1.9	4.5	6.3	4.4	5.3	3.51111	5.69444	4.3	5.3	5.6	6.78333	9.3	#N/A	15.1556	16.0444
30/11/2010	3	2.9	2.3	0.9	3.9	4.3	3.6	3.6	2.52222	3.45556	3.6	3.6	4.03333	5.65556	8.43889	#N/A	14.6333	14.4444
1/12/2010	3.6	3.5	2.7	2.3	4.2	4.4	4.2	3.6	3.01111	4.01111	3.4	4	4.73889	5.77222	9.01667	8.66667	14.8444	13.7556
2/12/2010	4.9	3.5	2.6	1.9	5.3	4.5	5	3.9	4.15	3.50556	4.6	3.9	5.85	5.61111	9.69444	8.87222	15.2889	14.3
3/12/2010	4.8	4.3	2	1.4	5.6	5.4	5	4.3	3.98333	3.91111	5	4.2	6.31667	5.53889	10.1167	8.97222	15.4	14.2444
4/12/2010	4.8	4.7	2.1	0.8	6	6.2	4.7	5.2	4.27778	4.92222	4.7	4.7	6.2	6.52778	9.63889	9.92778	15.1111	15.1667
5/12/2010	5.3	3.5	2.4	-0.1	6.6	5.5	5.2	4	4.95	3.32222	5.2	3.3	6.82222	4.85	10.6667	9.21111	16.2333	14.2222
6/12/2010	4.8	4.3	2.1	1.3	5.6	5.1	4.7	4.2	4.63889	3.47778	4.9	4	6.64444	4.53889	10.35	9.25	15.8222	14.6556
7/12/2010	3.3	4.5	0.9	1.6	4	5.5	3.3	4.5	3.36667	4.38889	3.8	4.4	5.77778	5.5	9.72222	9.90556	14.7222	15.5556
8/12/2010	3.8	4.7	1.2	1.8	4.4	6	4	4.7	2.75	4.40556	3.9	4.4	4.27778	5.32778	8.53889	10.3	14.5556	16.0778
9/12/2010	3.5	5.4	0.4	2.3	3.9	6.8	4.1	5.4	2.66111	5.13889	3.5	5.4	4.72778	6.25556	8.83889	11.3667	14.7	17.3111
10/12/2010	2.5	6.2	0.6	3.3	3.8	7.5	3.2	5.9	2.12778	6.31111	2.8	6.4	3.50556	7.52778	8.08333	11.5222	13.9778	17.3222
11/12/2010	4.5	5.4	1.4	2.5	5.3	6.5	4.3	5.3	3.82778	5.68333	4.5	5.5	4.81667	7.15556	9.39444	11.4389	15	16.4556
12/12/2010	2.9	4.9	-0.7	2.1	4	6.5	3.8	5.2	2.88889	4.47778	3.2	4.9	4.86111	6.18889	8.7	10.7111	13.9111	15.8111
13/12/2010	2.8	5.5	-0.4	1	3.9	6.7	3.4	5.2	2.69444	4.85556	3	5.4	4.75556	6.13889	8.30556	10.7111	13.7333	15.6222
14/12/2010	2.3	4.2	-0.4	-0.1	3	5.9	3	4.6	2.21111	4.02222	2.2	4.3	4.56667	5.91111	7.67222	9.97778	12.9667	14.5889
15/12/2010	3.1	4.7	0.1	0.9	3.9	6.2	3.5	5	2.85	4.62778	3.3	5.1	4.86667	6.57222	7.9	9.79444	13.1778	14.9333
16/12/2010	3.6	3.3	0.7	-0.8	4.5	4.7	4.1	4.1	3.43889	3.15556	3.6	3.4	5.40556	5.25556	8.56111	8.89444	13.5667	14.0111
17/12/2010	3.9	2.3	-0.2	-1.2	4.5	4.2	4.5	3.4	3.26667	2.66667	3.3	2.9	5.5	4.58333	8.64444	8.48889	13.5667	13.3778
18/12/2010	2.7	3.3	-1.5	0.7	3.8	4.9	3.5	3.9	2.52222	3.25556	2.8	4	4.80556	4.52222	7.52222	9.06111	12.5222	14.1778
19/12/2010	1.5	5.3	-2	2.6	2.8	6.9	2.1	5.4	1.98333	4.76111	2.2	5.6	3.80556	5.80556	7.60556	9.75556	12.7889	15.0444
20/12/2010	2.4	5	-0.3	2.1	2.9	6.4	2.4	5.2	2.20556	5.4	2.5	5.7	3.36111	6.38333	7.97222	9.92222	13.2111	15.9111
21/12/2010	1.6	4.9	-1	1.9	2.2	6.2	2.1	5.1	1.3	4.97778	1.2	5.4	2.79444	6.55	7.40556	9.76111	13.1778	15.1111
22/12/2010	1.7	4.3	-0.4	1.9	2.2	5.5	2.2	4.9	1	3.78889	1.3	4.2	2.07222	5.5	7.02222	9.35	13.1	15.1556
23/12/2010	3.3	5.6	0.8	2.9	3.9	6.3	3.7	5.6	2.35556	4.96111	3.2	5.7	3.33333	6.36667	8.1	10.6222	13.9556	16.7
24/12/2010	3.6	5.3	1.5	2.4	4.4	6.2	3.7	5.4	3.41111	4.60556	3.5	5.7	4.65	5.93889	9.2	10.3278	14.9444	16.7556
25/12/2010	4.4	5.3	2.3	2.6	4.8	6.3	3.9	5.3	4.2	4.46667	4.9	5.5	5.05556	6.05	9.73889	10.3278	15.8111	16.1778
26/12/2010	4.1	3	1.6	-0.3	4.8	4.1	4.3	4.1	4.16111	2.58889	4.8	3.2	5.15	5.41667	10.1056	8.59444	16.0556	13.6
27/12/2010	4.3	2.7	1.9	-0.1	4.9	3.8	4.4	3.3	4.43333	1.48889	5.3	2.7	5.20556	3.03889	10.2111	7.52778	16.5556	13.6889
28/12/2010	5	3.7	1.6	0.8	5.7	4.7	4.8	4.3	4.83333	2.65	4.9	4	4.93889	4.32222	9.90556	7.78333	15.8444	14.0556
29/12/2010	3.6	3	-0.5	0.2	4.7	3.8	4.2	3.8	4.47778	2.07222	4	3.4	5.88333	3.99444	9.57778	7.14444	14.7889	13.5222
30/12/2010	4.4	1.6	1	-1.1	5.4	2.7	4.5	2.8	4.06111	1.63889	4.4	2.3	4.98333	3.48333	9.48889	#N/A	15.0222	12.7333
1/1/2011	5.1	1.1	1.4	-1.6	6.3	1.7	5.5	2.4	5.3	-0.111111	5.1	1	6.31667	1.71667	10.7389	5.93889	16.2889	11.6889
2/1/2011	3.9	1.1	0.3	-1.3	5.1	1.6	4.7	2	4.37778	-0.177778	4.4	0.6	5.68889	0.45	10.2444	5.83333	15.4778	11.9889
3/1/2011	4.6	1.4	0.7	-0.6	5.8	1.4	5	1.9	4.4	0.344444	4.8	0.7	5.98889	1.45	9.9	6.6	15.4111	13.2
4/1/2011	4.5	1.2	1.1	-0.7	5.5	1.5	5	1.9	5.02778	0.611111	4.9	1.4	7.27778	1.42778	10.7167	6.35556	16.4	12.6444
5/1/2011	4.1	0.2	0.8	-2.2	4.7	0.3	4.8	1.6	4.16667	-0.0722222	3.9	0.2	5.46667	1.49444	9.9	5.96111	15.5	11.3778
6/1/2011	3.3	-0.1	0.3	-2.7	4.6	0.4	4.1	0.7	3.05	-0.844444	3.3	0	4.2	0.244444	9.01111	5.10556	14.8222	10.3889
7/1/2011	4.5	0.6	1.7	-1.9	5.5	1.1	4.8	1.7	4.17778	-0.05	4.8	0.3	5.18333	1.20556	10.0667	5.53333	16.4333	10.7667
8/1/2011	5.3	2.6	2.3	-1.2	6	3.4	5.5	2.8	4.53889	2.03889	5.2	2.5	6.11667	3.68333	10.9111	7.11111	17.2222	12.6222
9/1/2011	4.8	2.2	2.3	-1.6	5.3	3.5	4.9	2.8	3.43889	2.17222	4.4	2.4	4.95556	3.93333	10.5444	7.19444	17.1222	11.9222
10/1/2011	4.9	2.7	1.6	-2	5.2	3.5	5.1	2.9	3.31667	2.47778	4.4	2.7	4.89444	4.82222	10.2	7.65556	16.4111	12.3889
11/1/2011	3.1	3.5	0.2	-0.3	4.1	4.6	4	3.6	2.59444	3.2	3.2	4	4.55556	4.27222	9.26667	8.21111	15.6889	13.1
12/1/2011	2.1	4.4	-1.3	1.1	2.9	5.3	3.1	4.2	1.44444	4.74444	2	5.6	4.15	6.30556	7.51111	10.2944	13.1	15.6222
13/1/2011	1.9	4.4	-1.1	1.9	3.9	4.7	3.1	4.4	1.43333	3.89444	1.8	4.6	3.2	5.18889	6.82778	10.2778	12.3667	16.3667
14/1/2011	2.1	5	-1.6	1.8	3.7	5.7	3.1	5	1.56111	4.18333	2	4.9	2.9	4.87778	7.08889	9.76111	12.5333	15.5667
15/1/2011	2.6	4.8	-1.6	1.2	3.9	5.8	3.1	4.7	2.11667	4.53889	2.4	4.8	3.99444	5.56111	7.33889	9.70556	12.2222	15.2444
16/1/2011	2.5	4.2	-1	0.7	3.5	5.4	2.9	4.3	2.37222	4.16667	2.4	4.6	3.89444	5.58333	7.62778	10.5278	13.2778	16.2333
17/1/2011	1.3	4.3	-1.4	0.7	2.7	5.7	2.2	4.6	0.922222	3.50556	1.3	4.3	2.78889	4.81111	6.65	9.87222	12.8	15.4444
18/1/2011	3	3.9	-0.7	0.7	3.9	5.4	3.6	4.5	2.15	3.48889	2.7	4.5	3.74444	5.24444	7.86667	9.77778	13.8667	15.6667
19/1/2011	3.8	5.2	1.4	2.3	4.8	6.5	3.9	5.1	2.67778	4.72778	4.1	5.5	3.82778	5.49444	8.30556	10.5667	14.6556	16.5556
20/1/2011	5	5.3	2.8	2.5	5.8	6.4	5	5.4	4.28889	4.55556	4.9	5.1	5.77222	5.33333	10.3167	10.5833	16.8778	16.8556
21/1/2011	4.4	4.1	2.7	0.3	5.3	5.5	4.8	5	4.06667	3.57778	4.7	4	5.20556	5.87222	10.6333	9.04444	16.8	14.5444
22/1/2011	4.5	3.7	2.7	-0.3	5	5.4	4.8	4.2	3.65556	3.58889	4.8	3.8	4.22778	5.88333	10.5389	8.48889	16.9778	13.5111
23/1/2011	5.5	2.8	3.4	-0.6	6.1	4.6	5.6	4	4.71111	3.26111	5.6	3.7	5.26111	5.31111	11.2	8.6	17.5889	14.4556
24/1/2011	6.1	2.9	3.1	-0.1	6.5	4	6.1	3.9	5.51111	2.01111	6.5	3.4	6.43889	4.17778	11.4056	8.14444	17.5889	13.9889
25/1/2011	5.6	3	2.5	0.4	6.3	4.3	5.7	4.1	4.32778	2.32778	5.5	3.4	6.22222	4.15	10.0333	8.41111	15.9778	14.4889
26/1/2011	4.5	2.8	1.1	-0.2	5.5	4.1	5.4	3.6	3.96667	1.94444	4.6	2.8	6.23889	4.58889	9.98889	8.01111	15.9111	14.0222
27/1/2011	3.3	3.3	0.4	-0.1	4.5	5	4.6	3.9	2.87222	2.68333	3.2	3.4	5.03889	4.52778	8.88333	8.38889	14.6	14.6222
28/1/2011	2.2	4.1	-0.5	0.5	4.1	5.3	3.7	4.3	1.97778	3.7	3	4.2	4.06667	6.28333	7.8	9.43889	13.8444	15.3444
29/1/2011	3.5	3.5	0.5	0.1	4.6	5.3	4	4.2	2.80556	3.43889	4	3.7	4.57778	5.96667	8.50556	9.75556	14.6778	15.2111
30/1/2011	4.4	4.1	0.9	0.6	5.6	5.7	5	4.7	4.21667	3.4	4.2	4.1	5.83889	5.57778	9.86667	#N/A	16.2444	15.1111
1/2/2011	3.8	1.4	0.1	-1.9	5.4	2.4	4.6	2.6	3.77778	0.855556	4.5	1.6	6.1	3.56111	9.75	6.92222	15.7444	12.5778
2/2/2011	4	1.4	0.3	-0.5	5.3	2.6	4.5	2.3	3.93333	1.01111	3.9	2	5.49444	2.65	9.82222	6.87778	15.9778	12.9444
3/2/2011	3.3	3.4	-0.6	1.1	5	4.6	4.2	3.8	3.47778	2.88889	3.5	3.8	6.07778	4.83889	9.65	8.47222	15.7556	14.7333
4/2/2011	3.6	4.5	0.1	1.3	5.2	5.7	4	4.7	3.25	3.56111	3.6	4.3	5.91111	5.85	9.2	9.24444	15.5556	15.5889
5/2/2011	4	4.6	0	0.7	5.8	6.2	4.4	5.1	4.10556	4.04444	4.3	4.9	5.91667	6.22222	9.45556	9.63333	15.5889	15.7667
6/2/2011	4.2	3.9	0.3	1.1	6.1	6	4.6	4.7	4.31111	3.57778	4.7	4.8	6.71111	5.81667	9.86667	9.78333	15.7667	16.6111
7/2/2011	4.5	4.4	0.4	2	6.6	6.1	4.7	4.7	4.65	4.45556	4.4	5.3	7.17222	5.91111	10.4944	10.3944	16.3444	17.3667
8/2/2011	4.5	4.1	-0.3	1.9	6.7	5.7	5	4.9	4.54444	3.71667	4.6	4.4	7.00556	5.72222	9.96111	9.45556	16.1333	16.1778
9/2/2011	3.9	4.6	-0.7	1.2	5.8	5.9	4.4	5.3	4.40556	3.87222	4.1	4.5	6.84444	6.17778	10.0333	9.52222	15.3556	15.4556
10/2/2011	3.8	4.7	-1.2	0.7	5.4	6.2	4.2	5.3	4.12778	4.17778	3.7	4.7	7.72222	6.59444	10.1333	10.1444	15.6222	16.5222
11/2/2011	4.1	3.6	-0.3	0	6.2	5.4	4.7	4.6	4.43333	3.23333	4.2	3.8	5.96111	5.6	9.86667	9.47222	15.7889	15.6556
12/2/2011	4.3	4.7	0.1	0.6	6.2	6.3	4.9	5.1	4.50556	3.82778	4.4	4.4	6.81667	5.26111	9.77778	9.67778	15.6111	16.0333
13/2/2011	4.8	5.4	-0.2	2.1	6.7	7	5.4	6.1	4.90556	4.93889	4.9	5.6	7	7.23333	10.4389	10.55	16.3333	16.7444
14/2/2011	3	4.6	-1.7	0.8	5.1	6.7	4.2	6	3.48333	4.61111	3.3	4.6	5.42222	7.20556	9.20556	10.1889	14.8778	15.8556
15/2/2011	5.2	4.1	0.5	-0.8	7.2	6	5.5	5.5	5.10556	3.41111	5.5	3.2	7.12778	5.75556	10.6111	9.08889	16.8889	14.5111
16/2/2011	6.4	4.4	1.4	-0.3	8.4	6.3	6.8	5.4	6.8	3.51111	6.6	3.9	8.86667	5.14444	11.8111	9.13889	18.3556	14.6
17/2/2011	5.6	4.8	0.2	0.3	7.7	6.4	5.8	5.9	5.89444	4.67222	5.4	4.7	7.86111	7.05	10.6556	10.2889	16.4222	16.2111
18/2/2011	5.5	4.7	1	0.6	7.6	6.7	5.9	6.1	5.67222	4.69444	5.8	4.9	7.93889	7.86667	10.8944	10.7944	17.2	16.8111
19/2/2011	5.5	5.1	0.7	0.5	7.8	7.1	6.3	6.3	6.48333	4.99444	5.4	4.7	8.86111	7.67778	11.2889	10.2333	17.1667	16.3
20/2/2011	4	4.2	-0.9	-0.1	6.9	6.7	4.8	6.1	5.01111	4.36667	4.3	4	7.63333	6.25556	10.7889	9.88889	16.4333	15.4667
21/2/2011	4.5	4.4	-0.3	-0.1	6.9	7.2	5.2	5.8	5.09444	4.43889	4.9	4.3	7.15	6.22778	10.4722	9.50556	16.4	15.3
22/2/2011	6.5	4.7	1.8	-0.1	8.7	7.2	6.7	6	6.88333	5.06111	6.9	4.7	8.86111	7.11667	11.6	9.76111	17.7222	15.2556
23/2/2011	5.9	4.7	1	-0.1	8.2	7.1	6.8	6.2	6.28333	5	6	4.5	8.89444	6.95	11.2333	10.2278	16.9	16.5889
24/2/2011	4.7	4.6	0.4	-0.6	6.9	6.8	6.2	6.2	4.92778	5.58889	5	4.8	7.32222	8.45	9.81667	10.5944	15.3333	16.5222
25/2/2011	5.1	4	0.4	-0.6	7.6	6.3	6.4	5.4	5.43889	4.48333	5.6	4.4	8.26111	7.3	10.5333	10.1556	16.2	15.7
26/2/2011	3.2	5.7	-1.4	1.4	5.7	7.7	5.1	6.6	3.6	5.56667	3.7	5.7	6.39444	7.61667	8.9	10.5889	14.8333	16.6667
27/2/2011	2.1	6.6	-2.2	2.2	4.8	8.7	3.9	7.6	2.74444	6.82222	2.7	6.8	5.89444	9.29444	8.33333	#N/A	13.8444	17.4444
28/2/2011	2.3	8	-2.3	3	4.8	10.2	4.1	8.6	2.35556	8.54444	2.7	8.3	4.78333	11.4833	7.88333	#N/A	12.9889	19.8556
1/3/2011	4	7.1	-0.3	2.5	6.5	9.5	5.4	8.3	3.85	7.46667	4.6	7.4	6.18333	9.42778	9.93333	12.3556	16.1667	18.9556
2/3/2011	5.7	6.6	2.2	2.4	7.9	9	6.1	7.6	5.65	7.22222	6.4	6.8	7.33333	10.0667	10.5889	12.1167	17.3	18.3333
3/3/2011	6.8	5.5	2.8	1.2	9.2	8	7.6	7.1	6.98333	6.26667	7	6	9.01111	9.38333	11.9	11.2222	18.3889	16.6889
4/3/2011	5.9	4.2	1.4	0.1	8.1	6.7	7.1	5.8	6.02222	5.06111	6.2	4.5	8.40556	7.82778	11.7278	9.98889	17.6667	15.3556
5/3/2011	5.5	4.5	1.4	0.1	7.9	6.8	7	5.8	5.56111	4.46667	5.9	4.5	8.07222	7.05	11.3667	9.49444	17.1222	15.2222
6/3/2011	5.3	4.5	0.4	-0.1	7.3	6.7	6.7	5.9	5.05556	5.10556	5.4	4.6	7.65556	8.05556	10.3	9.86111	16.2444	14.8
7/3/2011	4.1	3.6	-0.8	-1	6.1	6.1	5.1	5.1	4.48889	4.17222	4.1	4.1	6.97778	6.94444	10.5	9.23333	16.3111	14.2333
8/3/2011	2.3	4.7	-3.2	0.5	5	7.4	4.1	5.9	3.23889	4.90556	2.3	5.2	5.82222	7.4	8.79444	9.85556	14.4111	15.9556
9/3/2011	2.7	5.1	-1.8	0.4	5.3	7.4	4.1	6.3	3.14444	5.02222	2.8	5.3	5.27778	7.85556	8.27778	10.2889	14.1889	16.3111
10/3/2011	4.6	4.4	0.1	0.7	7.1	7.1	5.9	6.2	4.95	4.59444	4.8	5	6.76667	7.36667	10.0278	9.90556	16.1667	15.9333
11/3/2011	5.4	4.8	1	0.9	7.8	7.6	6.6	6.4	5.44444	5.66111	5.7	5.2	7.56111	7.97778	10.8833	10.8056	17.4778	16.7333
12/3/2011	5.3	5.1	0.8	1	7.8	7.7	6.5	6.4	5.82222	5.97222	5.6	5.4	8.41111	7.75556	11.0778	10.8444	17.4444	17.3667
13/3/2011	5.9	5.1	1.6	0.9	8.3	7.5	6.7	6.2	6.08889	5.48333	6	5.7	8.88333	8.53889	11.0611	11.2889	17.5333	17.9333
14/3/2011	7.1	5	3.2	0.9	9.8	7.5	8.1	6.3	7.51111	5.03889	7.7	5.4	10.3222	8.16667	12.4167	10.7556	19.1	16.8889
15/3/2011	7.8	4.8	3.4	1	10.3	7.6	9	6.2	8.05	4.93333	7.6	5.2	10.5111	7.92222	12.7444	10.0056	19.3556	16.0889
16/3/2011	6.6	5.8	1.9	1.9	9.2	8.4	8.3	6.8	7.40556	6	7	6	10.05	8.67222	11.8222	10.85	17.8333	17.4222
17/3/2011	5.2	6	0.3	1.5	7.9	8.4	6.7	7.3	5.97222	6.11111	5.3	6.3	8.72222	8.95	10.9056	11.3278	16.4778	17.6667
18/3/2011	6	5.6	1.3	1.6	8.6	8.3	7.3	7	6.3	6.05	6.4	6.2	9.32222	8.81111	11.3	11.1	17.3667	17.6111
19/3/2011	6.4	6.5	1.5	2.6	8.9	9.5	7.6	7.6	6.88889	6.48333	6.8	6.9	9.45556	8.85556	12.1889	11.5722	18.5778	18.6333
20/3/2011	5.7	8.1	1	3.7	8.2	10.5	6.6	8.9	6.11667	8.1	6	8.2	8.13889	10.4889	12.1889	13.0333	19.2556	20.0222
21/3/2011	7.1	8.1	3.3	3.2	9.2	10.5	8.1	9.2	7.01667	8.47222	7.5	8.2	9.35556	10.8722	13.1889	13.2778	20.2778	19.7778
22/3/2011	7.6	6.5	3.7	1.1	10	8.8	9.3	8.4	7.82222	7.43333	7.9	6.8	9.96667	10.0444	13.5333	12.5444	20.6667	18.6111
23/3/2011	7.7	4	3	-0.9	9.9	6.6	9.2	6.3	7.86111	4.16111	7.6	4.3	10.6222	7.57778	13.9833	10.5056	20.4778	16.4111
24/3/2011	5	4	0.3	-0.4	7.3	7.1	6.8	6.2	5.36667	4.17778	5.2	4.4	8.31667	7.12222	11.4278	9.68889	17.9111	16.0556
25/3/2011	6.3	4.9	1.4	0.7	8.7	7.6	7.8	6.4	5.63889	5.38333	6.2	5.7	7.86111	8.21111	11.1611	10.7111	17.2444	17.2111
26/3/2011	7.2	5.9	2.3	1.3	9.6	8.4	8.6	7.8	7.21111	6.22222	7.5	6.1	9.06111	8.97778	12.8111	11.3	18.9556	17.6333
27/3/2011	6.2	7.5	0.8	2.5	8.4	9.9	7.5	8.7	6.61667	7.33333	6.1	7.5	8.83889	9.06667	12.2944	12.2722	18.6667	18.9778
28/3/2011	4	7	-1.1	1.8	6.9	9.6	5.4	8.4	4.44444	7.62778	4.2	6.9	6.92222	9.43333	9.55556	13.1056	15.3222	19.2667
29/3/2011	4.5	6	-0.5	0	7.4	8.1	6.3	7.6	5.08333	6.58333	4.8	6.1	7.21667	9.54444	10.0333	12.1778	15.9556	18.0111
30/3/2011	5.1	4.2	-0.7	-1	7.8	6.8	6.4	5.8	5.79444	4.93889	5.2	4.6	7.76111	7.43889	10.4278	#N/A	16.3333	16.6778
1/4/2011	5.9	7	0.6	2.4	8.3	9.5	6.8	8.2	6.58333	7.08889	5.9	7.5	9.38333	9.06111	11.7444	12.0111	17.9111	18.3111
2/4/2011	6.3	6.7	1	1.6	8.6	9.2	7.2	8.2	7.58333	6.73889	6.6	6.7	9.90556	8.71667	13.0944	11.2944	19.3444	17.3889
3/4/2011	5.4	5.9	0.2	1.6	7.9	8.6	6.4	7.5	6	6.23333	5.7	6.2	8.38889	8.20556	11.5389	10.8389	17.9889	17.0889
4/4/2011	6.9	6	2.1	2.1	9.2	8.9	7.6	8	6.83889	6.42778	6.9	6.5	8.98333	8.57222	12.0889	11.1833	19.0444	17.5778
5/4/2011	7.4	7.7	2.7	2.9	10	10.2	8.6	9	7.25556	7.65556	7.6	7.6	9.15	9.82778	12.4944	11.7333	19.1333	17.6444
6/4/2011	7.9	6.9	3	1.8	10.6	9.1	9.1	8.3	8.18333	7.08889	8.2	7.1	9.92778	9.83333	12.8278	11.3889	19.3556	17.1778
7/4/2011	6.9	6.4	2.3	1.3	9.7	8.7	8.3	8	7.13333	6.09444	7.1	6.2	9.32222	8.62222	11.7667	10.8167	18.2333	16.6556
8/4/2011	8.2	6.1	4.1	1.3	10.8	8.7	9.2	8	8.14444	5.74444	8.6	6.4	10.2333	8.10556	12.6611	10.7667	19.4222	16.9889
9/4/2011	8.1	6.8	3.6	2.6	10.6	9.7	9.4	8.5	8.58889	7.14444	8.3	7.3	10.8667	9.20556	12.8667	12.0278	19.2444	18.7
10/4/2011	7.9	7.8	3.3	3.6	10.8	10.4	9.4	9.4	8.07778	7.92222	8.2	8.5	10.4222	10.2167	12.05	12.7611	18.5	19.9111
11/4/2011	8.3	8.7	3.7	4.9	11.2	11.2	9.8	10.1	8.22222	8.77778	8.3	9.1	10.3167	10.9444	12.4389	13.4611	19.1333	20.4778
12/4/2011	7.8	8.9	2.7	4.7	10.7	11.5	9.3	10.7	7.45556	8.87222	7.9	9.2	9.58333	11.1	11.8	12.9611	18.0444	19.3778
13/4/2011	7.7	8.6	2.8	4.6	10.8	11.4	9.3	10.6	7.86667	9.00556	7.7	9.2	9.57778	11.1111	11.6556	13.2278	17.8333	19.2444
14/4/2011	8.1	8.7	3.5	4.6	11	11.7	9.9	10.4	8.41111	9.15556	8.3	9.5	10.6722	11.8333	12.3944	14.2111	18.3333	20.7111
15/4/2011	9	7.8	4	3.4	11.6	10.9	10.6	9.9	9.27222	7.96667	9.1	8.2	11.4278	10.3389	13.1111	11.9611	19.6667	18.1
16/4/2011	7.5	7.3	2.5	2.6	9.9	10.5	9.1	9.3	8.06111	7.62778	7.5	7.7	10.8167	9.83889	12.7222	11.1889	19.0444	17.3667
17/4/2011	6.7	7.6	2	2.7	9.5	10.8	8	9.8	7.20556	7.87222	6.6	7.6	9.60556	10	11.6556	11.3722	18.1667	17.0444
18/4/2011	7.2	7.9	2	2.5	9.6	10.7	8.4	10.4	7.45556	7.57778	7.3	7.6	9.62222	10.2722	12.0667	12.1056	18.2667	18.1889
19/4/2011	7.3	8.3	2.1	3.9	10	11.5	8.9	10.3	8.13889	8.21667	7.7	8.3	10.1444	10.5222	12.0778	12.2056	18.2889	18.5889
20/4/2011	7.8	8.5	2.8	3.7	10.9	11.4	9.1	10.1	8.38333	8.74444	7.8	8.7	10.6389	11.2833	12.7944	13.0167	19.3444	19.5222
21/4/2011	8.6	7.4	3.4	3	11.1	10.7	9.9	9.2	9.05556	8	8.5	7.8	11.5222	10.1556	13.5778	12.5778	19.5778	19.1667
22/4/2011	8.4	7.9	3.6	3.7	11	11.3	9.8	9.8	8.98333	8.19444	8.3	8.5	11.6833	10.4	13.3111	12.5556	19.0333	19.4333
23/4/2011	9	9.3	4.6	4.8	11.7	12.2	10.5	10.6	9.53889	8.77222	8.7	9.3	11.6389	11.1	13.4222	13.6167	19.4444	20.5667
24/4/2011	8.5	10.2	4.3	5.7	11.7	13.4	10	12	9.12778	9.71111	9	10.1	11.5444	11.8278	13.4556	14.0056	19.4444	21
25/4/2011	9.1	9.9	4.3	5.3	11.3	13	10.1	11.4	9.33333	9.81667	8.9	9.8	11.8833	12.1278	13.4667	13.4833	19.8111	19.7222
26/4/2011	9	9.4	3.9	4.8	12	12.8	10.7	11	9.51667	9.32222	9.1	9.5	11.6333	11.7833	13.3056	13.45	18.8	19.5667
27/4/2011	9.6	10.5	4.2	6	12.6	13.7	10.5	11.4	9.6	10.2278	9.5	10.5	12.2056	12.2889	14.0222	14.4889	20.1111	21.0556
28/4/2011	10.2	11.5	4.7	7.3	12.9	14.6	10.7	12.9	10.9944	11.1722	10	11.5	13.2833	13.5889	15.3167	15.0722	22.3	21.8778
29/4/2011	10	12.5	4.6	8.4	12.8	15.8	11.3	14.1	11.25	12.1278	10	12.6	13.5778	14.1278	16.1556	#N/A	23.1778	23.0111
30/4/2011	10.5	12.6	5.5	8.4	13.4	15.7	11.4	13.7	11.6	12.4167	10.6	12.5	13.9444	14.5222	16.6611	#N/A	23.8222	23.7667
1/5/2011	11.2	12	6.6	8.1	14.1	15.2	11.7	13.7	11.8333	11.9111	11.1	12.1	14.7667	14.2611	16.3111	16.2833	23.2667	23.0333
2/5/2011	12.3	12.2	8.1	8	15.4	15.2	13.5	13.9	12.7667	12.0111	12	12	15.1056	14.6444	16.8389	15.6667	23.8778	22.4111
3/5/2011	12.9	12.1	8.6	7.4	16.1	15.2	13.9	13.9	13.4056	12.5111	13	12.2	16.1556	15	17.7778	16.0389	24.9222	22.8
4/5/2011	12.2	11.8	7.5	7	15.3	14.5	13.5	13.7	13.0556	12.45	12.1	11.6	15.6167	15.7333	17.5611	17.0889	24.3667	23.6556
5/5/2011	11.7	11.8	7.1	7	14.6	14.7	13	13.7	12.0889	12.8444	11.2	12.2	14.9	15.6333	16.6944	17.4111	23.7222	23.9778
6/5/2011	10.8	12	5.9	7.1	14	14.9	12.2	13.3	11.85	12.6667	10.7	12	14.5944	15.2778	16.5389	17.1278	23.6111	23.4111
7/5/2011	10.1	11.7	5.1	6.6	12.8	15.2	11.7	13.4	10.5278	12.1944	9.9	11.9	13.4833	15.3889	15.3111	16.7944	21.8778	22.8556
8/5/2011	10.4	11.1	5.4	7.2	13.8	14.7	11.7	13.2	10.9333	11.75	10.5	11.3	13.6222	14.4056	15.4611	16.0667	22.1333	23.1444
9/5/2011	10.9	12.5	6.3	8	14	15.6	12.5	14	11.6833	12.3111	11.1	12	14.1056	15.1833	16.2944	16.7167	22.7222	24.2333
10/5/2011	11.5	12.7	7.3	7.9	14.8	15.6	12.9	14.2	12.2222	12.2556	11.7	12.1	14.9889	14.9611	16.6167	16.3167	23.5111	23.4556
11/5/2011	12.5	11.4	8.5	6.5	15.5	14.7	13.4	13.3	13.1389	12.4778	12.7	11.4	15.8611	15.5056	17.3	16.6944	24.2222	23.5889
12/5/2011	12.8	9.6	7.7	3.9	15.7	12.2	13.6	10.9	13.0167	10.1111	12.6	9.4	16.2444	13.7333	17.4222	15.9667	24	22.2667
13/5/2011	13	10	8.2	4.7	15.6	12.9	13.3	10.5	13.0333	10.6944	12.7	10	16.1444	13.7556	17.3611	15.85	24.2333	22.7667
14/5/2011	12.8	10.9	8.2	6	15.7	14	13.2	11.5	13.9778	11.5333	12.8	10.9	17.0556	14.7222	17.9889	16.5111	24.6111	23.6222
15/5/2011	11.9	10.5	7	5.5	14.7	13.8	12.5	11.8	13.2611	10.6833	12	10.2	16.3667	13.9389	17.2611	15.8389	23.5667	22.3667
16/5/2011	10.2	11.1	4.4	6.6	12.7	14.2	11.3	12.1	11.3444	11.7333	10	10.9	14.8611	14.8	15.9944	16.4444	21.9111	23.3333
17/5/2011	9.3	12	3.7	7.4	12.3	15	10.2	12.8	10.2333	12.7278	9.2	11.5	13.3444	15.5056	15.5722	17.15	21.5222	23.6778
18/5/2011	10.3	11.7	5.2	6.9	13.4	14.5	11.1	12.6	10.6278	11.9667	10.1	11.2	12.9389	14.5889	15.0611	16.3167	21.3222	22.8667
19/5/2011	11.4	11.8	6.5	7.3	14.4	15	11.8	12.5	11.3722	12.1	11.3	11.7	13.6611	14.2722	15.6222	16.2389	22.0444	23.1111
20/5/2011	10.9	13.2	5.9	8.9	13.7	15.8	12	13.3	11.3556	13.0111	10.6	12.9	14.2222	15.5944	16.0667	17.1722	22.3	24.2889
21/5/2011	9.9	13.7	5	9.4	12.8	16.5	10.9	14.2	10.2167	13.7889	9.7	13.4	13.6833	16.1667	14.9556	17.45	21.0667	24.8889
22/5/2011	11.7	13.6	6.8	9	14.2	16.2	11.8	14.1	11.3056	13.4611	11.1	12.9	13.6944	15.8444	15.1167	17.4611	22.1	24.3778
23/5/2011	12.9	13.5	8.1	9.1	15.5	16.2	12.9	13.8	12.5111	13.3889	12	12.9	14.7611	16.2611	16.2	17.9333	23.0444	24.9556
24/5/2011	13	12.9	8.4	8.2	15.7	15.9	13.4	13.5	13.0222	13.3	12.8	12.7	15.3889	16.6611	16.1611	17.6889	22.4778	24.1889
25/5/2011	13.4	12.1	9.1	7	16.3	14.9	13.7	13	13.4944	12.3889	13.1	11.7	15.9611	15.8333	16.9944	17.1056	23.6556	23.3778
26/5/2011	13.1	10.9	9.1	5.9	16.2	13.7	13.6	11.9	13.5389	11.3611	13	10.7	16.1611	14.8778	17.2722	16.4389	24.0111	23.0222
27/5/2011	13.8	10.7	9.6	6.1	17.2	13.4	14.3	11.6	14.0278	11.4778	13.5	10.7	16.2833	14.8167	17.65	16.6667	24.2667	23.2556
28/5/2011	14.4	12.3	10.1	7.8	17.6	15	14.7	13	14.1722	12.3944	13.8	12	16.7667	15.0167	17.7944	16.3667	24.8667	22.4889
29/5/2011	15.3	13.8	10.6	9.4	18	16.2	15.6	13.8	14.4667	13.3333	14.1	13.1	16.8222	15.8389	18.0944	16.5556	25.4556	23.1667
30/5/2011	15.8	14.3	11.8	9.6	19	16.6	16.1	14.2	15.6333	14.2167	15.1	13.7	17.4833	16.7667	18.9778	#N/A	26.5556	24.0556
1/6/2011	16.9	13.5	13	8.9	20.2	15.9	17.3	13.7	16.9222	13.6167	16.1	13	18.8	16.2722	20.2278	18.0389	27.5333	25
2/6/2011	15.7	15.2	11.2	10.2	18.7	17.9	16.6	15.3	16.6278	14.9111	15.3	13.9	19.1389	16.7333	20.65	17.8833	27.7556	24.4111
3/6/2011	14.4	15	9.9	9.9	17.7	17.7	15.6	15.4	15.3056	16.0056	14.4	14	17.8889	17.8	18.95	18.35	25.3333	24.8444
4/6/2011	14.6	13.9	10.6	9.6	17.9	16.8	16.1	14.8	15.4556	15.3111	14.5	13.9	18.3889	17.6833	19.2611	18.5444	26.0444	25.3444
5/6/2011	15.1	14.4	10.7	9.8	17.9	17.2	16.1	15.1	15.2556	15.5333	14.5	14.1	18.1889	17.7333	19.1389	18.5056	26.2111	25.4222
6/6/2011	15.5	13.8	11.7	9	18.6	16.2	16.5	14.3	15.6	14.4278	15	13.4	18.5833	17.7389	19.15	18.6111	25.7333	25.6111
7/6/2011	16.3	13.8	12.7	9.1	19.4	16.1	17.1	14.2	16.6278	13.9778	16.1	13.1	19.2667	17.0611	20.25	18.25	27	25.4444
8/6/2011	16.2	15.2	12.2	10.7	19	18	17.4	15.1	16.3278	15.0222	15.7	14.3	19.3333	17.5889	19.8833	18.9333	26.3556	26.0667
9/6/2011	16.7	15.9	12.4	11.6	19.6	18.6	17.7	16.3	16.35	15.8056	15.7	15.3	19.2611	18.4444	19.8611	19.9389	26.5111	26.9222
10/6/2011	16.3	15.2	11.8	10.9	19	17.8	17.1	15.8	16.1722	15.2667	15.2	15	19.2389	18.6389	20.4889	20.0611	27.0667	27.1333
11/6/2011	15.9	15.7	10.9	11.5	18.3	18.5	17	16.4	16.1444	15.3667	15.3	15.1	19.5111	18.4611	20.4833	19.5333	27.1889	26.6333
12/6/2011	16.4	16.6	11.5	12.2	18.8	19.5	16.9	16.8	16.3222	15.9833	15.4	15.6	19.6222	18.7722	20.2889	19.8444	26.6444	26.7444
13/6/2011	17.2	16.7	12.9	12.5	19.8	19.2	17.4	16.9	16.7889	15.8944	16.2	15.6	19.7556	19.0833	20.4833	19.9222	27.4667	26.4667
14/6/2011	17.9	15.7	13.5	12.1	20.6	18.6	18.2	16.5	17.5722	16.2444	16.8	15.7	20.4667	19.2722	21.2167	20.5444	28.2667	27.8111
15/6/2011	17.9	16.1	13.6	12.5	20.8	18.9	18.6	16.6	18.1611	16.4222	17.3	16.3	21.3167	19.7778	22.0667	20.8111	29.1444	28.1444
16/6/2011	18	16.4	13.4	12.5	20.5	19.1	18.4	16.6	17.7944	16.7833	16.9	16.2	20.8556	19.8944	21.5833	20.7611	28.2889	27.7111
17/6/2011	18.4	17	14.4	12.5	21.2	19.7	18.6	17.2	18.4722	17.0389	17.3	15.8	21.4111	20.0167	22.0056	21.3167	29.0111	28.0556
18/6/2011	19.6	17.5	15.8	13.3	22.6	20.6	19.6	17.8	19.6167	17.6389	18.5	16.5	22.0278	20.1222	22.6833	21.3778	29.5222	28.6667
19/6/2011	19.6	17	15.2	12.6	22.5	19.7	19.6	17.8	20.2056	17.7889	18.2	16.3	22.3278	20.7222	23.3278	22.1611	30.5778	29.3111
20/6/2011	17.7	16.4	12.6	12	20.3	19.3	18.6	16.9	17.8444	17.3667	16.9	15.9	21.1944	20.4111	22.2556	21.7889	28.8333	28.7111
21/6/2011	17.4	16.4	13	12.6	20.3	19.5	18.3	16.5	17.1944	17.1389	16.4	16	20.7611	20.6889	21.75	21.8667	28.6444	29.3556
22/6/2011	17.8	16.7	14	12.9	20.9	19.8	18.6	16.8	17.8	17.7111	17	16.6	21.1222	21.1389	21.9	22.2278	28.2556	29.3
23/6/2011	18.5	17.3	14.6	13.5	21.9	19.9	19.6	16.9	18.5611	17.8444	17.8	16.7	21.5333	21.1889	22.1222	22.2333	28.4889	28.9556
24/6/2011	18.6	18.6	14.9	15	21.8	21.7	19.4	18.4	18.7778	19.1278	18.2	17.8	21.7944	21.75	22.3944	22.6278	28.9333	29.7333
25/6/2011	18.7	19.2	14.9	15.8	22	22	19.8	19.2	18.8889	19.6944	18.1	18.5	21.8611	22.2611	22.3778	23.0611	28.8889	30.3667
26/6/2011	19.8	19.9	15.9	16.5	22.8	22.6	20.6	19.6	19.4778	19.9389	18.7	19.2	22.1889	22.7889	22.5111	23.4222	29.0889	30.3556
27/6/2011	20.7	21	17.1	17.2	23.7	24.2	21.1	20.6	20.3	20.5333	19.7	19.7	23.1667	23.1667	23.6	23.8556	30.7333	30.9556
28/6/2011	20.6	20.7	16.7	16.3	23.6	23.2	21.1	20.1	20.1333	20.05	19.6	19.5	22.9611	23.1333	23.6444	24.1222	30.8	30.8111
29/6/2011	20.8	19	17.1	14.6	23.6	21.8	21.1	19	20.1611	18.9222	19.5	18.2	22.9944	22.4333	23.4056	#N/A	30.0889	29.8889
30/6/2011	21.5	19.4	17.5	15.3	24.4	22.1	21.5	20.1	20.5167	19.1778	19.9	18.4	23.0167	22.5889	23.5444	#N/A	30.6111	29.8111
1/7/2011	21.5	20.6	17.6	16.9	24.5	23.2	21.7	20.5	21.1778	19.95	19.9	19.5	23.4667	22.8167	24.3667	23.1556	32.1556	29.6556
2/7/2011	21	21.5	17.4	18.1	24.1	24.2	21.5	21.5	21.1778	20.7556	20.2	20.2	23.9444	23.5111	24.7167	23.6944	32.0333	30.2667
3/7/2011	21.1	21.8	17.2	18.3	24.1	24.6	21.3	21.6	20.7222	21.0778	20.3	20.4	23.8222	24.0944	24.3278	24.2167	31.1889	31.5222
4/7/2011	19.6	19.9	16	15.7	22.7	22.7	20.6	20.8	19.8667	20.1833	19	19.2	23.1278	23.6556	23.9667	24.5222	30.9111	31.4889
5/7/2011	18.3	18.8	14.9	14.6	21.4	21.8	19.8	19.6	19.25	17.9833	17.9	17.7	22.5	21.6889	23.5333	22.7889	30.0778	29.5444
6/7/2011	19.9	19.4	17	15.9	23.1	22.2	20.5	20	19.8	18.6333	19.3	18.5	23.1	21.7444	23.7667	22.8111	31.0778	29.6444
7/7/2011	22.6	19.8	20	16.5	25.2	22.7	22.3	20.2	21.7278	19.4833	21.1	18.6	24.45	22.7	24.6444	22.8889	32.3333	29.7667
8/7/2011	23.6	19.9	20.4	16.3	26.2	22.8	23.7	20.3	23.0611	19.6	22	19	25.2333	22.4389	25.3	22.7944	32.6556	29.6889
9/7/2011	22.3	20.4	19.2	16.5	24.6	23.1	23	20.3	22.5056	19.5944	21.2	19	25.2778	22.6611	25.8611	23.0667	32.8556	29.5222
10/7/2011	20.9	20.2	17.9	16	23.6	22.8	22	20.1	21.3111	20.05	20.4	18.7	24.3444	22.7889	24.9833	23.5056	31.6444	30.4444
11/7/2011	20	20.5	16.8	16.8	22.6	23	21.2	20.7	21.1278	20.5667	19.7	19.1	24.2722	23.1778	24.5444	23.9556	31.1889	31.4
12/7/2011	19.9	20	16.5	16.6	22.9	22.6	21.2	20.4	20.5278	20.8667	19.4	19.3	24.0056	23.9222	24.4278	24.8667	30.9778	32.2889
13/7/2011	21.1	20.6	17.7	18	24.1	23.2	21.8	20.8	20.8722	21.0222	20.2	19.7	24.3056	23.8444	24.5667	24.2889	31.2556	31.6556
14/7/2011	22.2	21.1	19.3	18.1	24.9	23.7	23.1	21.1	21.7667	21.8611	21.3	20.3	25.3222	24.5889	25.3278	25.1333	32.4222	32.4444
15/7/2011	22.2	21.1	19	18.3	24.8	23.7	22.8	21.5	21.8111	21.9667	21.1	20.4	24.9444	24.7778	25.4389	24.8778	32.2778	32.0333
16/7/2011	21.4	21.6	18.4	18.7	24.2	24.7	22.3	22.1	21.0889	21.8944	20.3	20.7	24.3333	24.4944	24.8222	24.9278	31.5444	32.0111
17/7/2011	21.9	22.5	18.5	19.2	24.6	25.1	22.9	22.6	21.35	21.8944	20.8	20.9	24.3556	24.8444	24.65	25.0222	31.1889	32.1556
18/7/2011	21.3	23.8	18.2	20.9	23.8	26.4	22.5	23.7	21.3278	22.8	20.7	22	24.5278	25.2889	24.9778	25.6389	31.6111	32.7889
19/7/2011	21.3	24.3	18.3	20.9	24.1	27	22.7	24.5	21.15	22.9167	20.5	22.5	24.4667	25.3056	24.7	25.4778	31.4222	32.4778
20/7/2011	22.4	24.2	19.5	21.2	25.1	27	23.4	24.6	21.6722	23.2611	21.2	22.5	24.8556	25.6667	24.7833	25.6889	31.4444	32.4444
21/7/2011	22.7	25.3	19.3	22.2	25.1	27.9	23.6	25.4	21.5333	24.25	21.1	23.4	24.6889	26.4722	24.8222	26.2333	31.3667	33.3556
22/7/2011	22.4	25.3	19.3	21.9	25	27.9	23.5	25.5	21.1611	24.3889	20.9	23.3	24.2167	26.9333	24.6722	26.6222	31.6778	33.9
23/7/2011	22.2	23.5	19.3	19.7	24.9	26.1	23.2	24.3	21.2611	23.4222	21	22.4	24.3889	26.2056	25.0056	26.3667	32.2333	33.3556
24/7/2011	22.7	21.8	19.5	18.6	25.4	24.4	23.4	23.3	21.9056	22.1667	21.5	20.8	25.2222	25.3556	25.4389	26.3056	32.4556	32.9556
25/7/2011	22.5	22	19.7	18.6	25.4	24.8	23.7	23.6	22.6278	22.2333	21.6	21.3	25.4833	25.5111	25.5944	25.7778	32.5333	32.7444
26/7/2011	23.4	23.1	20.4	19.7	26.4	25.8	24.6	24	22.9944	23.1722	22.2	22	25.8889	26.3333	25.8111	26.3722	32.6778	33.2333
27/7/2011	24.3	22.5	21.8	19.2	27.3	25	25.1	23.6	23.7278	22.8889	23.1	22	26.6889	26.1611	26.8444	26.6444	34.0667	33.7556
28/7/2011	24.7	22.1	22.2	18.9	27.7	24.8	25.3	23.6	24.0556	21.65	23.3	20.9	26.8889	25.0556	27.1111	25.5	34.4111	32.0556
29/7/2011	23.9	22.1	21.4	19.4	26.4	24.9	24.7	23.6	24.0222	21.7333	23.1	20.8	27.1667	25.0778	27.1444	25.2167	34.0778	31.9222
[truncated: 31,663 more rows]
